# Supplementary material for: Proteomic Blood Profiles Obtained by Totally Blind Biological Clustering in Stable and Exacerbated COPD Patients
Source: Cells. 2024 May 17;13(10):866. doi: 10.3390/cells13100866 (PMC11119172; doi:10.3390/cells13100866)
Supplement: Supplementary file 1 [file cells-13-00866-s001.zip › Clusters Supplementary Tables S1, S2, S3.xlsx]

## Sheet: Table S1 Identified...
Method	Protein group	Both Methods	Type	first_only	Gene	Entry	From	Entry	Entry Name	Protein names	Length	Keywords	Gene Ontology (biological process)
LC-MS/MS	IGLV4-69	FALSE	Ig peptide	TRUE	IGLV4-69	A0A075B6H9	A0A075B6H9	A0A075B6H9	LV469_HUMAN	Immunoglobulin lambda variable 4-69	119	Adaptive immunity;Cell membrane;Disulfide bond;Immunity;Immunoglobulin;Immunoglobulin domain;Membrane;Reference proteome;Secreted;Signal	adaptive immune response [GO:0002250]; immune response [GO:0006955]
LC-MS/MS	IGLV8-61	FALSE	Ig peptide	TRUE	IGLV8-61	A0A075B6I0	A0A075B6I0	A0A075B6I0	LV861_HUMAN	Immunoglobulin lambda variable 8-61	122	Adaptive immunity;Cell membrane;Disulfide bond;Immunity;Immunoglobulin;Immunoglobulin domain;Membrane;Reference proteome;Secreted;Signal	adaptive immune response [GO:0002250]; immune response [GO:0006955]
LC-MS/MS	IGLV7-46	FALSE	Ig peptide	TRUE	IGLV7-46	A0A075B6I9	A0A075B6I9	A0A075B6I9	LV746_HUMAN	Immunoglobulin lambda variable 7-46	117	Adaptive immunity;Cell membrane;Disulfide bond;Immunity;Immunoglobulin;Immunoglobulin domain;Membrane;Reference proteome;Secreted;Signal	adaptive immune response [GO:0002250]; immune response [GO:0006955]
LC-MS/MS	IGLV5-37	FALSE	Ig peptide	TRUE	IGLV5-37	A0A075B6J1	A0A075B6J1	A0A075B6J1	LV537_HUMAN	Immunoglobulin lambda variable 5-37	123	Adaptive immunity;Cell membrane;Disulfide bond;Immunity;Immunoglobulin;Immunoglobulin domain;Membrane;Reference proteome;Secreted;Signal	adaptive immune response [GO:0002250]; immune response [GO:0006955]
LC-MS/MS	IGLV2-18	FALSE	Ig peptide	TRUE	IGLV2-18	A0A075B6J9	A0A075B6J9	A0A075B6J9	LV218_HUMAN	Immunoglobulin lambda variable 2-18	118	Adaptive immunity;Cell membrane;Disulfide bond;Immunity;Immunoglobulin;Immunoglobulin domain;Membrane;Pyrrolidone carboxylic acid;Reference proteome;Secreted;Signal	adaptive immune response [GO:0002250]; immune response [GO:0006955]
LC-MS/MS	IGLV3-16	FALSE	Ig peptide	TRUE	IGLV3-16	A0A075B6K0	A0A075B6K0	A0A075B6K0	LV316_HUMAN	Immunoglobulin lambda variable 3-16	115	Adaptive immunity;Cell membrane;Disulfide bond;Immunity;Immunoglobulin;Immunoglobulin domain;Membrane;Reference proteome;Secreted;Signal	adaptive immune response [GO:0002250]; immune response [GO:0006955]
LC-MS/MS	IGLV3-12	FALSE	Ig peptide	TRUE	IGLV3-12	A0A075B6K2	A0A075B6K2	A0A075B6K2	LV312_HUMAN	Immunoglobulin lambda variable 3-12	115	Adaptive immunity;Cell membrane;Disulfide bond;Immunity;Immunoglobulin;Immunoglobulin domain;Membrane;Reference proteome;Secreted;Signal	adaptive immune response [GO:0002250]; immune response [GO:0006955]
LC-MS/MS	IGLV3-10	FALSE	Ig peptide	TRUE	IGLV3-10	A0A075B6K4	A0A075B6K4	A0A075B6K4	LV310_HUMAN	Immunoglobulin lambda variable 3-10	115	Adaptive immunity;Cell membrane;Disulfide bond;Immunity;Immunoglobulin;Immunoglobulin domain;Membrane;Reference proteome;Secreted;Signal	adaptive immune response [GO:0002250]; immune response [GO:0006955]
LC-MS/MS	IGLV3-9	FALSE	Ig peptide	TRUE	IGLV3-9	A0A075B6K5	A0A075B6K5	A0A075B6K5	LV39_HUMAN	Immunoglobulin lambda variable 3-9	115	Adaptive immunity;Cell membrane;Disulfide bond;Immunity;Immunoglobulin;Immunoglobulin domain;Membrane;Reference proteome;Secreted;Signal	adaptive immune response [GO:0002250]; immune response [GO:0006955]
LC-MS/MS	IGKV2[D]-28	FALSE	Ig peptide	TRUE	IGKV2-28	A0A075B6P5	A0A075B6P5	A0A075B6P5	KV228_HUMAN	Immunoglobulin kappa variable 2-28	120	Adaptive immunity;Cell membrane;Disulfide bond;Immunity;Immunoglobulin;Immunoglobulin domain;Membrane;Reference proteome;Secreted;Signal	adaptive immune response [GO:0002250]; immune response [GO:0006955]
LC-MS/MS	IGKV2[D]-28	FALSE	Ig peptide	FALSE	IGKV2D-28	P01615	P01615	P01615	KVD28_HUMAN	Immunoglobulin kappa variable 2D-28 (Ig kappa chain V-II region FR) (Ig kappa chain V-II region GM607) (Ig kappa chain V-II region MIL) (Ig kappa chain V-II region TEW)	120	Adaptive immunity;Cell membrane;Direct protein sequencing;Disulfide bond;Immunity;Immunoglobulin;Immunoglobulin domain;Membrane;Reference proteome;Secreted;Signal	adaptive immune response [GO:0002250]; immune response [GO:0006955]
LC-MS/MS	IGHV3-64	FALSE	Ig peptide	TRUE	IGHV3-64	A0A075B6Q5	A0A075B6Q5	A0A075B6Q5	HV364_HUMAN	Immunoglobulin heavy variable 3-64	118	Adaptive immunity;Cell membrane;Disulfide bond;Immunity;Immunoglobulin;Immunoglobulin domain;Membrane;Reference proteome;Secreted;Signal	immunoglobulin mediated immune response [GO:0016064]
LC-MS/MS	IGHV4-4	FALSE	Ig peptide	TRUE	IGHV4-4	A0A075B6R2	A0A075B6R2	A0A075B6R2	HV404_HUMAN	Immunoglobulin heavy variable 4-4	117	Adaptive immunity;Cell membrane;Disulfide bond;Immunity;Immunoglobulin;Immunoglobulin domain;Membrane;Reference proteome;Secreted;Signal	immunoglobulin mediated immune response [GO:0016064]
LC-MS/MS	IGKV2[D]-29	FALSE	Ig peptide	TRUE	IGKV2D-29	A0A075B6S2	A0A075B6S2	A0A075B6S2	KVD29_HUMAN	Immunoglobulin kappa variable 2D-29	120	Adaptive immunity;Cell membrane;Disulfide bond;Immunity;Immunoglobulin;Immunoglobulin domain;Membrane;Reference proteome;Secreted;Signal	adaptive immune response [GO:0002250]; immune response [GO:0006955]
LC-MS/MS	IGKV2[D]-29	FALSE	Ig peptide	FALSE	IGKV2D-26	A0A0A0MRZ7	A0A0A0MRZ7	A0A0A0MRZ7	KVD26_HUMAN	Immunoglobulin kappa variable 2D-26	120	Adaptive immunity;Cell membrane;Disulfide bond;Immunity;Immunoglobulin;Immunoglobulin domain;Membrane;Reference proteome;Secreted;Signal	adaptive immune response [GO:0002250]; immune response [GO:0006955]
LC-MS/MS	IGKV1-27	FALSE	Ig peptide	TRUE	IGKV1-27	A0A075B6S5	A0A075B6S5	A0A075B6S5	KV127_HUMAN	Immunoglobulin kappa variable 1-27	117	Adaptive immunity;Cell membrane;Disulfide bond;Immunity;Immunoglobulin;Immunoglobulin domain;Membrane;Reference proteome;Secreted;Signal	adaptive immune response [GO:0002250]; immune response [GO:0006955]
LC-MS/MS	IGKV2[D]-40	FALSE	Ig peptide	TRUE	IGKV2-40	A0A087WW87	A0A087WW87	A0A087WW87	KV240_HUMAN	Immunoglobulin kappa variable 2-40	121	Adaptive immunity;Cell membrane;Disulfide bond;Immunity;Immunoglobulin;Immunoglobulin domain;Membrane;Reference proteome;Secreted;Signal	adaptive immune response [GO:0002250]; immune response [GO:0006955]
LC-MS/MS	IGKV2[D]-40	FALSE	Ig peptide	FALSE	IGKV2D-40	P01614	P01614	P01614	KVD40_HUMAN	Immunoglobulin kappa variable 2D-40 (Ig kappa chain V-II region Cum)	121	Adaptive immunity;Cell membrane;Direct protein sequencing;Disulfide bond;Immunity;Immunoglobulin;Immunoglobulin domain;Membrane;Reference proteome;Secreted;Signal	adaptive immune response [GO:0002250]; immune response [GO:0006955]
LC-MS/MS	IGHV3-49	FALSE	Ig peptide	TRUE	IGHV3-49	A0A0A0MS15	A0A0A0MS15	A0A0A0MS15	HV349_HUMAN	Immunoglobulin heavy variable 3-49	119	Adaptive immunity;Cell membrane;Disulfide bond;Immunity;Immunoglobulin;Immunoglobulin domain;Membrane;Reference proteome;Secreted;Signal	immunoglobulin mediated immune response [GO:0016064]
LC-MS/MS	IGKV6D-21	FALSE	Ig peptide	TRUE	IGKV6D-21	A0A0A0MT36	A0A0A0MT36	A0A0A0MT36	KVD21_HUMAN	Immunoglobulin kappa variable 6D-21	114	Adaptive immunity;Cell membrane;Disulfide bond;Immunity;Immunoglobulin;Immunoglobulin domain;Membrane;Reference proteome;Secreted;Signal	adaptive immune response [GO:0002250]; immune response [GO:0006955]
LC-MS/MS	IGLV1-36	FALSE	Ig peptide	TRUE	IGLV1-36	A0A0B4J1U3	A0A0B4J1U3	A0A0B4J1U3	LV136_HUMAN	Immunoglobulin lambda variable 1-36	117	3D-structure;Adaptive immunity;Cell membrane;Disulfide bond;Immunity;Immunoglobulin;Immunoglobulin domain;Membrane;Reference proteome;Secreted;Signal	adaptive immune response [GO:0002250]; immune response [GO:0006955]
LC-MS/MS	IGHV6-1	FALSE	Ig peptide	TRUE	IGHV6-1	A0A0B4J1U7	A0A0B4J1U7	A0A0B4J1U7	HV601_HUMAN	Immunoglobulin heavy variable 6-1	121	Adaptive immunity;Cell membrane;Disulfide bond;Immunity;Immunoglobulin;Immunoglobulin domain;Membrane;Reference proteome;Secreted;Signal	immunoglobulin mediated immune response [GO:0016064]
LC-MS/MS	IGHV3-15	FALSE	Ig peptide	TRUE	IGHV3-15	A0A0B4J1V0	A0A0B4J1V0	A0A0B4J1V0	HV315_HUMAN	Immunoglobulin heavy variable 3-15	119	Adaptive immunity;Cell membrane;Disulfide bond;Immunity;Immunoglobulin;Immunoglobulin domain;Membrane;Reference proteome;Secreted;Signal	immunoglobulin mediated immune response [GO:0016064]
LC-MS/MS	IGHV3-[11,21,48]	FALSE	Ig peptide	TRUE	IGHV3-21	A0A0B4J1V1	A0A0B4J1V1	A0A0B4J1V1	HV321_HUMAN	Immunoglobulin heavy variable 3-21	117	3D-structure;Adaptive immunity;Cell membrane;Disease variant;Disulfide bond;Immunity;Immunoglobulin;Immunoglobulin domain;Membrane;Reference proteome;Secreted;Signal	immunoglobulin mediated immune response [GO:0016064]
LC-MS/MS	IGHV3-[11,21,48]	FALSE	Ig peptide	FALSE	IGHV3-48	P01763	P01763	P01763	HV348_HUMAN	Immunoglobulin heavy variable 3-48 (Ig heavy chain V-III region WEA)	117	Adaptive immunity;Cell membrane;Direct protein sequencing;Disulfide bond;Immunity;Immunoglobulin;Immunoglobulin domain;Membrane;Reference proteome;Secreted;Signal	immune response [GO:0006955]; immunoglobulin mediated immune response [GO:0016064]
LC-MS/MS	IGHV3-[11,21,48]	FALSE	Ig peptide	FALSE	IGHV3-11	P01762	P01762	P01762	HV311_HUMAN	Immunoglobulin heavy variable 3-11 (Ig heavy chain V-III region TRO)	117	Adaptive immunity;Cell membrane;Direct protein sequencing;Disulfide bond;Immunity;Immunoglobulin;Immunoglobulin domain;Membrane;Pyrrolidone carboxylic acid;Reference proteome;Secreted;Signal	immune response [GO:0006955]; immunoglobulin mediated immune response [GO:0016064]
LC-MS/MS	IGHV2-26	FALSE	Ig peptide	TRUE	IGHV2-26	A0A0B4J1V2	A0A0B4J1V2	A0A0B4J1V2	HV226_HUMAN	Immunoglobulin heavy variable 2-26	119	Adaptive immunity;Cell membrane;Disulfide bond;Immunity;Immunoglobulin;Immunoglobulin domain;Membrane;Pyrrolidone carboxylic acid;Reference proteome;Secreted;Signal	immunoglobulin mediated immune response [GO:0016064]
LC-MS/MS	IGHV3-73	FALSE	Ig peptide	TRUE	IGHV3-73	A0A0B4J1V6	A0A0B4J1V6	A0A0B4J1V6	HV373_HUMAN	Immunoglobulin heavy variable 3-73	119	Adaptive immunity;Cell membrane;Disulfide bond;Immunity;Immunoglobulin;Immunoglobulin domain;Membrane;Reference proteome;Secreted;Signal	immunoglobulin mediated immune response [GO:0016064]
LC-MS/MS	IGHV3-74	FALSE	Ig peptide	TRUE	IGHV3-74	A0A0B4J1X5	A0A0B4J1X5	A0A0B4J1X5	HV374_HUMAN	Immunoglobulin heavy variable 3-74	117	Adaptive immunity;Cell membrane;Disulfide bond;Immunity;Immunoglobulin;Immunoglobulin domain;Membrane;Reference proteome;Secreted;Signal	immunoglobulin mediated immune response [GO:0016064]
LC-MS/MS	IGHV3-43	FALSE	Ig peptide	TRUE	IGHV3-43	A0A0B4J1X8	A0A0B4J1X8	A0A0B4J1X8	HV343_HUMAN	Immunoglobulin heavy variable 3-43	118	Adaptive immunity;Cell membrane;Disulfide bond;Immunity;Immunoglobulin;Immunoglobulin domain;Membrane;Reference proteome;Secreted;Signal	immunoglobulin mediated immune response [GO:0016064]
LC-MS/MS	IGLV9-49	FALSE	Ig peptide	TRUE	IGLV9-49	A0A0B4J1Y8	A0A0B4J1Y8	A0A0B4J1Y8	LV949_HUMAN	Immunoglobulin lambda variable 9-49	123	Adaptive immunity;Cell membrane;Disulfide bond;Immunity;Immunoglobulin;Immunoglobulin domain;Membrane;Phosphoprotein;Reference proteome;Secreted;Signal	adaptive immune response [GO:0002250]; immune response [GO:0006955]
LC-MS/MS	IGHV3-72	FALSE	Ig peptide	TRUE	IGHV3-72	A0A0B4J1Y9	A0A0B4J1Y9	A0A0B4J1Y9	HV372_HUMAN	Immunoglobulin heavy variable 3-72	119	Adaptive immunity;Cell membrane;Disulfide bond;Immunity;Immunoglobulin;Immunoglobulin domain;Membrane;Reference proteome;Secreted;Signal	immunoglobulin mediated immune response [GO:0016064]
LC-MS/MS	IGHV1-69D	FALSE	Ig peptide	TRUE	IGHV1-69D	A0A0B4J2H0	A0A0B4J2H0	A0A0B4J2H0	HV69D_HUMAN	Immunoglobulin heavy variable 1-69D	117	3D-structure;Adaptive immunity;Cell membrane;Disulfide bond;Immunity;Immunoglobulin;Immunoglobulin domain;Membrane;Pyrrolidone carboxylic acid;Reference proteome;Secreted;Signal	immunoglobulin mediated immune response [GO:0016064]
LC-MS/MS	IGKV6-21	FALSE	Ig peptide	TRUE	IGKV6-21	A0A0C4DH24	A0A0C4DH24	A0A0C4DH24	KV621_HUMAN	Immunoglobulin kappa variable 6-21	114	Adaptive immunity;Cell membrane;Disulfide bond;Immunity;Immunoglobulin;Immunoglobulin domain;Membrane;Reference proteome;Secreted;Signal	adaptive immune response [GO:0002250]; immune response [GO:0006955]
LC-MS/MS	IGHV1-3	FALSE	Ig peptide	TRUE	IGHV1-3	A0A0C4DH29	A0A0C4DH29	A0A0C4DH29	HV103_HUMAN	Immunoglobulin heavy variable 1-3	117	Adaptive immunity;Cell membrane;Disulfide bond;Immunity;Immunoglobulin;Immunoglobulin domain;Membrane;Reference proteome;Secreted;Signal	immunoglobulin mediated immune response [GO:0016064]
LC-MS/MS	IGHV1-18	FALSE	Ig peptide	TRUE	IGHV1-18	A0A0C4DH31	A0A0C4DH31	A0A0C4DH31	HV118_HUMAN	Immunoglobulin heavy variable 1-18	117	Adaptive immunity;Cell membrane;Disulfide bond;Immunity;Immunoglobulin;Immunoglobulin domain;Membrane;Reference proteome;Secreted;Signal	immunoglobulin mediated immune response [GO:0016064]
LC-MS/MS	IGHV3-20	FALSE	Ig peptide	TRUE	IGHV3-20	A0A0C4DH32	A0A0C4DH32	A0A0C4DH32	HV320_HUMAN	Immunoglobulin heavy variable 3-20	117	Adaptive immunity;Cell membrane;Disulfide bond;Immunity;Immunoglobulin;Immunoglobulin domain;Membrane;Reference proteome;Secreted;Signal	immunoglobulin mediated immune response [GO:0016064]
LC-MS/MS	IGHV1-24	FALSE	Ig peptide	TRUE	IGHV1-24	A0A0C4DH33	A0A0C4DH33	A0A0C4DH33	HV124_HUMAN	Immunoglobulin heavy variable 1-24	117	Adaptive immunity;Cell membrane;Disulfide bond;Immunity;Immunoglobulin;Immunoglobulin domain;Membrane;Reference proteome;Secreted;Signal	immunoglobulin mediated immune response [GO:0016064]
LC-MS/MS	IGHV4-28	FALSE	Ig peptide	TRUE	IGHV4-28	A0A0C4DH34	A0A0C4DH34	A0A0C4DH34	HV428_HUMAN	Immunoglobulin heavy variable 4-28	117	Adaptive immunity;Cell membrane;Disulfide bond;Immunity;Immunoglobulin;Immunoglobulin domain;Membrane;Reference proteome;Secreted;Signal	immunoglobulin mediated immune response [GO:0016064]
LC-MS/MS	IGHV5-51	FALSE	Ig peptide	TRUE	IGHV5-51	A0A0C4DH38	A0A0C4DH38	A0A0C4DH38	HV551_HUMAN	Immunoglobulin heavy variable 5-51	117	Adaptive immunity;Cell membrane;Disulfide bond;Immunity;Immunoglobulin;Immunoglobulin domain;Membrane;Reference proteome;Secreted;Signal	immunoglobulin mediated immune response [GO:0016064]
LC-MS/MS	IGHV1-58	FALSE	Ig peptide	TRUE	IGHV1-58	A0A0C4DH39	A0A0C4DH39	A0A0C4DH39	HV158_HUMAN	Immunoglobulin heavy variable 1-58	117	Adaptive immunity;Cell membrane;Disulfide bond;Immunity;Immunoglobulin;Immunoglobulin domain;Membrane;Reference proteome;Secreted;Signal	immunoglobulin mediated immune response [GO:0016064]
LC-MS/MS	IGHV3-[53,66]	FALSE	Ig peptide	TRUE	IGHV3-66	A0A0C4DH42	A0A0C4DH42	A0A0C4DH42	HV366_HUMAN	Immunoglobulin heavy variable 3-66	116	Adaptive immunity;Cell membrane;Disulfide bond;Immunity;Immunoglobulin;Immunoglobulin domain;Membrane;Reference proteome;Secreted;Signal	immunoglobulin mediated immune response [GO:0016064]
LC-MS/MS	IGHV3-[53,66]	FALSE	Ig peptide	FALSE	IGHV3-53	P01767	P01767	P01767	HV353_HUMAN	Immunoglobulin heavy variable 3-53 (Ig heavy chain V-III region BUT)	116	Adaptive immunity;Cell membrane;Direct protein sequencing;Disulfide bond;Immunity;Immunoglobulin;Immunoglobulin domain;Membrane;Reference proteome;Secreted;Signal	immune response [GO:0006955]; immunoglobulin mediated immune response [GO:0016064]
LC-MS/MS	IGHV2-70D	FALSE	Ig peptide	TRUE	IGHV2-70D	A0A0C4DH43	A0A0C4DH43	A0A0C4DH43	HV70D_HUMAN	Immunoglobulin heavy variable 2-70D	119	Adaptive immunity;Cell membrane;Disulfide bond;Immunity;Immunoglobulin;Immunoglobulin domain;Membrane;Pyrrolidone carboxylic acid;Reference proteome;Secreted;Signal	immunoglobulin mediated immune response [GO:0016064]
LC-MS/MS	IGKV1-[8,9]	FALSE	Ig peptide	TRUE	IGKV1-8	A0A0C4DH67	A0A0C4DH67	A0A0C4DH67	KV108_HUMAN	Immunoglobulin kappa variable 1-8	115	Adaptive immunity;Cell membrane;Disulfide bond;Immunity;Immunoglobulin;Immunoglobulin domain;Membrane;Reference proteome;Secreted;Signal	adaptive immune response [GO:0002250]; immune response [GO:0006955]
LC-MS/MS	IGKV1-[8,9]	FALSE	Ig peptide	FALSE	IGKV1-9	A0A0C4DH69	A0A0C4DH69	A0A0C4DH69	KV109_HUMAN	Immunoglobulin kappa variable 1-9	117	Adaptive immunity;Cell membrane;Disulfide bond;Immunity;Immunoglobulin;Immunoglobulin domain;Membrane;Reference proteome;Secreted;Signal	adaptive immune response [GO:0002250]; immune response [GO:0006955]
LC-MS/MS	IGKV2-24	FALSE	Ig peptide	TRUE	IGKV2-24	A0A0C4DH68	A0A0C4DH68	A0A0C4DH68	KV224_HUMAN	Immunoglobulin kappa variable 2-24	120	Adaptive immunity;Cell membrane;Disulfide bond;Immunity;Immunoglobulin;Immunoglobulin domain;Membrane;Reference proteome;Secreted;Signal	adaptive immune response [GO:0002250]; immune response [GO:0006955]
LC-MS/MS	IGHA2	FALSE	Ig peptide	TRUE		P0DOX2	P0DOX2	P0DOX2	IGA2_HUMAN	Immunoglobulin alpha-2 heavy chain (Immunoglobulin alpha-2 heavy chain BUT)	455	Adaptive immunity;Cell membrane;Direct protein sequencing;Disulfide bond;Glycoprotein;Immunity;Immunoglobulin;Immunoglobulin domain;Membrane;Repeat;Secreted	adaptive immune response [GO:0002250]
LC-MS/MS	IGHA2	FALSE	Ig peptide	FALSE	IGHV7-4-1	A0A0J9YVY3	A0A0J9YVY3	A0A0J9YVY3	HV741_HUMAN	Immunoglobulin heavy variable 7-4-1	117	Adaptive immunity;Cell membrane;Disulfide bond;Immunity;Immunoglobulin;Immunoglobulin domain;Membrane;Reference proteome;Secreted;Signal	immunoglobulin mediated immune response [GO:0016064]
LC-MS/MS	IGHA2	FALSE	Ig peptide	FALSE	IGHA2	P01877	P01877	P01877	IGHA2_HUMAN	Immunoglobulin heavy constant alpha 2 (Ig alpha-2 chain C region) (Ig alpha-2 chain C region BUT) (Ig alpha-2 chain C region LAN)	391	3D-structure;Adaptive immunity;Alternative splicing;Cell membrane;Direct protein sequencing;Disulfide bond;Glycoprotein;Immunity;Immunoglobulin;Immunoglobulin domain;Membrane;Reference proteome;Repeat;Secreted;Transmembrane;Transmembrane helix	adaptive immune response [GO:0002250]; antibacterial humoral response [GO:0019731]; B cell receptor signaling pathway [GO:0050853]; complement activation, classical pathway [GO:0006958]; glomerular filtration [GO:0003094]; immune response [GO:0006955]; positive regulation of respiratory burst [GO:0060267]; retina homeostasis [GO:0001895]
LC-MS/MS	IGHV3-64D	FALSE	Ig peptide	TRUE	IGHV3-64D	A0A0J9YX35	A0A0J9YX35	A0A0J9YX35	HV64D_HUMAN	Immunoglobulin heavy variable 3-64D	117	Adaptive immunity;Cell membrane;Disulfide bond;Immunity;Immunoglobulin;Immunoglobulin domain;Membrane;Reference proteome;Secreted;Signal	immunoglobulin mediated immune response [GO:0016064]
LC-MS/MS	IGHV5-10-1	FALSE	Ig peptide	TRUE	IGHV5-10-1	A0A0J9YXX1	A0A0J9YXX1	A0A0J9YXX1	HV5X1_HUMAN	Immunoglobulin heavy variable 5-10-1	117	Adaptive immunity;Cell membrane;Disulfide bond;Immunity;Immunoglobulin;Immunoglobulin domain;Membrane;Reference proteome;Secreted;Signal	immunoglobulin mediated immune response [GO:0016064]
LC-MS/MS	IGKV2-29	FALSE	Ig peptide	TRUE	IGKV2-29	A2NJV5	A2NJV5	A2NJV5	KV229_HUMAN	Immunoglobulin kappa variable 2-29	120	Adaptive immunity;Cell membrane;Disulfide bond;Immunity;Immunoglobulin;Immunoglobulin domain;Membrane;Reference proteome;Secreted;Signal	adaptive immune response [GO:0002250]; immune response [GO:0006955]
LC-MS/MS	ALB	FALSE	Protein	TRUE	ALB	P02768	P02768	P02768	ALBU_HUMAN	Albumin	609	3D-structure;Alternative splicing;Calcium;Cleavage on pair of basic residues;Copper;Direct protein sequencing;Disease variant;Disulfide bond;Glycation;Glycoprotein;Lipid-binding;Metal-binding;Methylation;Phosphoprotein;Reference proteome;Repeat;Secreted;Signal;Zinc	cellular response to starvation [GO:0009267]; maintenance of mitochondrion location [GO:0051659]; negative regulation of apoptotic process [GO:0043066]; negative regulation of programmed cell death [GO:0043069]; retina homeostasis [GO:0001895]
LC-MS/MS	KRT[1,2,6B,77]	FALSE	Protein	TRUE	KRT1	P04264	P04264	P04264	K2C1_HUMAN	Keratin, type II cytoskeletal 1 (67 kDa cytokeratin) (Cytokeratin-1) (CK-1) (Hair alpha protein) (Keratin-1) (K1) (Type-II keratin Kb1)	644	3D-structure;Cell membrane;Citrullination;Coiled coil;Cytoplasm;Direct protein sequencing;Disease variant;Ichthyosis;Intermediate filament;Keratin;Membrane;Methylation;Palmoplantar keratoderma;Phosphoprotein;Reference proteome	complement activation, lectin pathway [GO:0001867]; establishment of skin barrier [GO:0061436]; fibrinolysis [GO:0042730]; intermediate filament organization [GO:0045109]; keratinization [GO:0031424]; negative regulation of inflammatory response [GO:0050728]; peptide cross-linking [GO:0018149]; protein heterotetramerization [GO:0051290]; regulation of angiogenesis [GO:0045765]; response to oxidat…
LC-MS/MS	KRT[1,2,6B,77]	FALSE	Protein	FALSE	KRT6B	P04259	P04259	P04259	K2C6B_HUMAN	Keratin, type II cytoskeletal 6B (Cytokeratin-6B) (CK-6B) (Keratin-6B) (K6B) (Type-II keratin Kb10)	564	Acetylation;Coiled coil;Direct protein sequencing;Disease variant;Ectodermal dysplasia;Intermediate filament;Keratin;Palmoplantar keratoderma;Reference proteome	ectoderm development [GO:0007398]; intermediate filament organization [GO:0045109]; keratinization [GO:0031424]
LC-MS/MS	KRT[1,2,6B,77]	FALSE	Protein	FALSE	KRT77	Q7Z794	Q7Z794	Q7Z794	K2C1B_HUMAN	Keratin, type II cytoskeletal 1b (Cytokeratin-1B) (CK-1B) (Keratin-77) (K77) (Type-II keratin Kb39)	578	Citrullination;Coiled coil;Intermediate filament;Keratin;Methylation;Reference proteome	intermediate filament organization [GO:0045109]; keratinization [GO:0031424]
LC-MS/MS	KRT[1,2,6B,77]	FALSE	Protein	FALSE	KRT2	P35908	P35908	P35908	K22E_HUMAN	Keratin, type II cytoskeletal 2 epidermal (Cytokeratin-2e) (CK-2e) (Epithelial keratin-2e) (Keratin-2 epidermis) (Keratin-2e) (K2e) (Type-II keratin Kb2)	639	Coiled coil;Cytoplasm;Disease variant;Ichthyosis;Intermediate filament;Keratin;Methylation;Phosphoprotein;Reference proteome	epidermis development [GO:0008544]; intermediate filament organization [GO:0045109]; keratinization [GO:0031424]; keratinocyte activation [GO:0032980]; keratinocyte development [GO:0003334]; keratinocyte migration [GO:0051546]; keratinocyte proliferation [GO:0043616]; peptide cross-linking [GO:0018149]; positive regulation of epidermis development [GO:0045684]
LC-MS/MS	KRT[10-3;15,17,19,24-5;27-8;31-2;35-8]	FALSE	Protein	TRUE	KRT10	P13645	P13645	P13645	K1C10_HUMAN	Keratin, type I cytoskeletal 10 (Cytokeratin-10) (CK-10) (Keratin-10) (K10)	584	3D-structure;Coiled coil;Cytoplasm;Direct protein sequencing;Disease variant;Disulfide bond;Ichthyosis;Intermediate filament;Keratin;Phosphoprotein;Reference proteome;Secreted	epidermis development [GO:0008544]; epithelial cell differentiation [GO:0030855]; intermediate filament organization [GO:0045109]; keratinocyte differentiation [GO:0030216]; peptide cross-linking [GO:0018149]; positive regulation of epidermis development [GO:0045684]; protein heterotetramerization [GO:0051290]
LC-MS/MS	KRT[10-3;15,17,19,24-5;27-8;31-2;35-8]	FALSE	Protein	FALSE	KRT19	P08727	P08727	P08727	K1C19_HUMAN	Keratin, type I cytoskeletal 19 (Cytokeratin-19) (CK-19) (Keratin-19) (K19)	400	Coiled coil;Direct protein sequencing;Host-virus interaction;Intermediate filament;Keratin;Methylation;Phosphoprotein;Reference proteome	cell differentiation involved in embryonic placenta development [GO:0060706]; epithelial cell differentiation [GO:0030855]; intermediate filament organization [GO:0045109]; Notch signaling pathway [GO:0007219]; response to estrogen [GO:0043627]; sarcomere organization [GO:0045214]
LC-MS/MS	KRT[10-3;15,17,19,24-5;27-8;31-2;35-8]	FALSE	Protein	FALSE	KRT17	Q04695	Q04695	Q04695	K1C17_HUMAN	Keratin, type I cytoskeletal 17 (39.1) (Cytokeratin-17) (CK-17) (Keratin-17) (K17)	432	Coiled coil;Cytoplasm;Disease variant;Ectodermal dysplasia;Intermediate filament;Isopeptide bond;Keratin;Palmoplantar keratoderma;Phosphoprotein;Reference proteome;Ubl conjugation	epithelial cell differentiation [GO:0030855]; hair follicle morphogenesis [GO:0031069]; intermediate filament organization [GO:0045109]; keratinization [GO:0031424]; positive regulation of cell growth [GO:0030307]; positive regulation of hair follicle development [GO:0051798]; positive regulation of translation [GO:0045727]
LC-MS/MS	KRT[10-3;15,17,19,24-5;27-8;31-2;35-8]	FALSE	Protein	FALSE	KRT15	P19012	P19012	P19012	K1C15_HUMAN	Keratin, type I cytoskeletal 15 (Cytokeratin-15) (CK-15) (Keratin-15) (K15)	456	Alternative splicing;Coiled coil;Intermediate filament;Isopeptide bond;Keratin;Phosphoprotein;Reference proteome;Ubl conjugation	epidermis development [GO:0008544]; epithelial cell differentiation [GO:0030855]; intermediate filament organization [GO:0045109]
LC-MS/MS	KRT[10-3;15,17,19,24-5;27-8;31-2;35-8]	FALSE	Protein	FALSE	KRT28	Q7Z3Y7	Q7Z3Y7	Q7Z3Y7	K1C28_HUMAN	Keratin, type I cytoskeletal 28 (Cytokeratin-28) (CK-28) (Keratin-25D) (K25D) (Keratin-28) (K28) (Type I inner root sheath-specific keratin-K25irs4)	464	Coiled coil;Cytoplasm;Intermediate filament;Keratin;Reference proteome	epithelial cell differentiation [GO:0030855]; hair follicle morphogenesis [GO:0031069]; intermediate filament organization [GO:0045109]
LC-MS/MS	KRT[10-3;15,17,19,24-5;27-8;31-2;35-8]	FALSE	Protein	FALSE	KRT31	Q15323	Q15323	Q15323	K1H1_HUMAN	Keratin, type I cuticular Ha1 (Hair keratin, type I Ha1) (Keratin-31) (K31)	416	Coiled coil;Intermediate filament;Keratin;Reference proteome	epidermis development [GO:0008544]; epithelial cell differentiation [GO:0030855]; intermediate filament organization [GO:0045109]
LC-MS/MS	KRT[10-3;15,17,19,24-5;27-8;31-2;35-8]	FALSE	Protein	FALSE	KRT35	Q92764	Q92764	Q92764	KRT35_HUMAN	Keratin, type I cuticular Ha5 (Hair keratin, type I Ha5) (Keratin-35) (K35)	455	Coiled coil;Intermediate filament;Keratin;Reference proteome	anatomical structure morphogenesis [GO:0009653]; epithelial cell differentiation [GO:0030855]; intermediate filament organization [GO:0045109]
LC-MS/MS	KRT[10-3;15,17,19,24-5;27-8;31-2;35-8]	FALSE	Protein	FALSE	KRT32	Q14532	Q14532	Q14532	K1H2_HUMAN	Keratin, type I cuticular Ha2 (Hair keratin, type I Ha2) (Keratin-32) (K32)	448	Coiled coil;Intermediate filament;Keratin;Reference proteome	epidermis development [GO:0008544]; epithelial cell differentiation [GO:0030855]; intermediate filament organization [GO:0045109]
LC-MS/MS	KRT[10-3;15,17,19,24-5;27-8;31-2;35-8]	FALSE	Protein	FALSE	KRT37	O76014	O76014	O76014	KRT37_HUMAN	Keratin, type I cuticular Ha7 (Hair keratin, type I Ha7) (Keratin-37) (K37)	449	Coiled coil;Intermediate filament;Keratin;Reference proteome	epithelial cell differentiation [GO:0030855]; intermediate filament organization [GO:0045109]
LC-MS/MS	KRT[10-3;15,17,19,24-5;27-8;31-2;35-8]	FALSE	Protein	FALSE	KRT25	Q7Z3Z0	Q7Z3Z0	Q7Z3Z0	K1C25_HUMAN	Keratin, type I cytoskeletal 25 (Cytokeratin-25) (CK-25) (Keratin-25) (K25) (Keratin-25A) (K25A) (Type I inner root sheath-specific keratin-K25irs1)	450	Coiled coil;Cytoplasm;Disease variant;Hypotrichosis;Intermediate filament;Keratin;Phosphoprotein;Reference proteome	cytoskeleton organization [GO:0007010]; epithelial cell differentiation [GO:0030855]; hair cycle [GO:0042633]; hair follicle morphogenesis [GO:0031069]; intermediate filament organization [GO:0045109]
LC-MS/MS	KRT[10-3;15,17,19,24-5;27-8;31-2;35-8]	FALSE	Protein	FALSE	KRT38	O76015	O76015	O76015	KRT38_HUMAN	Keratin, type I cuticular Ha8 (Hair keratin, type I Ha8) (Keratin-38) (K38)	456	Coiled coil;Intermediate filament;Keratin;Reference proteome	epithelial cell differentiation [GO:0030855]; intermediate filament organization [GO:0045109]
LC-MS/MS	KRT[10-3;15,17,19,24-5;27-8;31-2;35-8]	FALSE	Protein	FALSE	KRT13	P13646	P13646	P13646	K1C13_HUMAN	Keratin, type I cytoskeletal 13 (Cytokeratin-13) (CK-13) (Keratin-13) (K13)	458	Alternative splicing;Coiled coil;Direct protein sequencing;Disease variant;Glycoprotein;Intermediate filament;Keratin;Methylation;Phosphoprotein;Reference proteome	cytoskeleton organization [GO:0007010]; epithelial cell differentiation [GO:0030855]; intermediate filament organization [GO:0045109]; regulation of translation in response to stress [GO:0043555]
LC-MS/MS	KRT[10-3;15,17,19,24-5;27-8;31-2;35-8]	FALSE	Protein	FALSE	KRT27	Q7Z3Y8	Q7Z3Y8	Q7Z3Y8	K1C27_HUMAN	Keratin, type I cytoskeletal 27 (Cytokeratin-27) (CK-27) (Keratin-25C) (K25C) (Keratin-27) (K27) (Type I inner root sheath-specific keratin-K25irs3)	459	Coiled coil;Cytoplasm;Intermediate filament;Keratin;Reference proteome	epithelial cell differentiation [GO:0030855]; hair follicle morphogenesis [GO:0031069]; intermediate filament organization [GO:0045109]
LC-MS/MS	KRT[10-3;15,17,19,24-5;27-8;31-2;35-8]	FALSE	Protein	FALSE	KRT36	O76013	O76013	O76013	KRT36_HUMAN	Keratin, type I cuticular Ha6 (Hair keratin, type I Ha6) (Keratin-36) (K36)	467	Alternative splicing;Coiled coil;Intermediate filament;Keratin;Reference proteome	epithelial cell differentiation [GO:0030855]; intermediate filament organization [GO:0045109]; regulation of keratinocyte differentiation [GO:0045616]
LC-MS/MS	KRT[10-3;15,17,19,24-5;27-8;31-2;35-8]	FALSE	Protein	FALSE	KRT12	Q99456	Q99456	Q99456	K1C12_HUMAN	Keratin, type I cytoskeletal 12 (Cytokeratin-12) (CK-12) (Keratin-12) (K12)	494	Coiled coil;Corneal dystrophy;Direct protein sequencing;Disease variant;Intermediate filament;Keratin;Reference proteome	cornea development in camera-type eye [GO:0061303]; epithelial cell differentiation [GO:0030855]; intermediate filament organization [GO:0045109]; morphogenesis of an epithelium [GO:0002009]; visual perception [GO:0007601]
LC-MS/MS	KRT[10-3;15,17,19,24-5;27-8;31-2;35-8]	FALSE	Protein	FALSE	KRT24	Q2M2I5	Q2M2I5	Q2M2I5	K1C24_HUMAN	Keratin, type I cytoskeletal 24 (Cytokeratin-24) (CK-24) (Keratin-24) (K24) (Type I keratin-24)	525	Coiled coil;Intermediate filament;Keratin;Reference proteome	epithelial cell differentiation [GO:0030855]; intermediate filament organization [GO:0045109]
LC-MS/MS	KRT9	FALSE	Protein	TRUE	KRT9	P35527	P35527	P35527	K1C9_HUMAN	Keratin, type I cytoskeletal 9 (Cytokeratin-9) (CK-9) (Keratin-9) (K9)	623	Coiled coil;Direct protein sequencing;Disease variant;Intermediate filament;Keratin;Palmoplantar keratoderma;Phosphoprotein;Reference proteome	epidermis development [GO:0008544]; epithelial cell differentiation [GO:0030855]; intermediate filament organization [GO:0045109]; skin development [GO:0043588]; spermatogenesis [GO:0007283]
LC-MS/MS	PDLIM1	FALSE	Protein	TRUE	PDLIM1	O00151	O00151	O00151	PDLI1_HUMAN	PDZ and LIM domain protein 1 (C-terminal LIM domain protein 1) (Elfin) (LIM domain protein CLP-36)	329	3D-structure;Acetylation;Cytoplasm;Cytoskeleton;Direct protein sequencing;LIM domain;Metal-binding;Phosphoprotein;Reference proteome;Zinc	actin cytoskeleton organization [GO:0030036]; establishment or maintenance of actin cytoskeleton polarity [GO:0030950]; fibroblast migration [GO:0010761]; heart development [GO:0007507]; maintenance of cell polarity [GO:0030011]; muscle structure development [GO:0061061]; regulation of transcription by RNA polymerase II [GO:0006357]; response to hypoxia [GO:0001666]; response to oxidative stress …
LC-MS/MS	MASP2	FALSE	Protein	TRUE	MASP2	O00187	O00187	O00187	MASP2_HUMAN	Mannan-binding lectin serine protease 2 (EC 3.4.21.104) (MBL-associated serine protease 2) (Mannose-binding protein-associated serine protease 2) (MASP-2) [Cleaved into: Mannan-binding lectin serine protease 2 A chain; Mannan-binding lectin serine protease 2 B chain]	686	3D-structure;Alternative splicing;Autocatalytic cleavage;Calcium;Complement pathway;Direct protein sequencing;Disease variant;Disulfide bond;EGF-like domain;Hydrolase;Hydroxylation;Immunity;Innate immunity;Metal-binding;Protease;Reference proteome;Repeat;Secreted;Serine protease;Signal;Sushi	complement activation, classical pathway [GO:0006958]; complement activation, lectin pathway [GO:0001867]; proteolysis [GO:0006508]
LC-MS/MS	MPHOSPH10	FALSE	Protein	TRUE	MPHOSPH10	O00566	O00566	O00566	MPP10_HUMAN	U3 small nucleolar ribonucleoprotein protein MPP10 (M phase phosphoprotein 10)	681	3D-structure;Acetylation;Chromosome;Coiled coil;Isopeptide bond;Nucleus;Phosphoprotein;Reference proteome;Ribonucleoprotein;Ribosome biogenesis;rRNA processing;Ubl conjugation	maturation of SSU-rRNA [GO:0030490]; ribosomal small subunit biogenesis [GO:0042274]; RNA processing [GO:0006396]; RNA splicing [GO:0008380]; RNA splicing, via transesterification reactions [GO:0000375]
LC-MS/MS	APOL1	FALSE	Protein	TRUE	APOL1	O14791	O14791	O14791	APOL1_HUMAN	Apolipoprotein L1 (Apolipoprotein L) (Apo-L) (ApoL) (Apolipoprotein L-I) (ApoL-I)	398	3D-structure;Alternative splicing;Cholesterol metabolism;Direct protein sequencing;Disease variant;Glycoprotein;HDL;Lipid metabolism;Lipid transport;Phosphoprotein;Reference proteome;Secreted;Signal;Steroid metabolism;Sterol metabolism;Transport	chloride transmembrane transport [GO:1902476]; cholesterol metabolic process [GO:0008203]; cytolysis by host of symbiont cells [GO:0051838]; innate immune response [GO:0045087]; lipid transport [GO:0006869]; lipoprotein metabolic process [GO:0042157]
LC-MS/MS	TRIM66	FALSE	Protein	TRUE	TRIM66	O15016	O15016	O15016	TRI66_HUMAN	Tripartite motif-containing protein 66	1351	3D-structure;Alternative splicing;Bromodomain;Coiled coil;Metal-binding;Nucleus;Reference proteome;Repeat;Zinc;Zinc-finger
LC-MS/MS	CD5L	FALSE	Protein	TRUE	CD5L	O43866	O43866	O43866	CD5L_HUMAN	CD5 antigen-like (Apoptosis inhibitor expressed by macrophages) (hAIM) (CT-2) (IgM-associated peptide) (SP-alpha)	347	Apoptosis;Cytoplasm;Direct protein sequencing;Disulfide bond;Glycoprotein;Immunity;Inflammatory response;Reference proteome;Repeat;Secreted;Signal	apoptotic process [GO:0006915]; cellular defense response [GO:0006968]; immune system process [GO:0002376]; inflammatory response [GO:0006954]; positive regulation of complement-dependent cytotoxicity [GO:1903661]; regulation of complement activation [GO:0030449]; zymogen activation [GO:0031638]
LC-MS/MS	ERN1	FALSE	Protein	TRUE	ERN1	O75460	O75460	O75460	ERN1_HUMAN	Serine/threonine-protein kinase/endoribonuclease IRE1 (Endoplasmic reticulum-to-nucleus signaling 1) (Inositol-requiring protein 1) (hIRE1p) (Ire1-alpha) (IRE1a) [Includes: Serine/threonine-protein kinase (EC 2.7.11.1); Endoribonuclease (EC 3.1.26.-)]	977	3D-structure;ADP-ribosylation;Alternative splicing;Apoptosis;ATP-binding;Disulfide bond;Endoplasmic reticulum;Glycoprotein;Hydrolase;Kinase;Magnesium;Membrane;Metal-binding;Multifunctional enzyme;Nucleotide-binding;Phosphoprotein;Reference proteome;Serine/threonine-protein kinase;Signal;Transcription;Transcription regulation;Transferase;Transmembrane;Transmembrane helix;Unfolded protein response	cellular response to glucose stimulus [GO:0071333]; cellular response to hydrogen peroxide [GO:0070301]; cellular response to unfolded protein [GO:0034620]; cellular response to vascular endothelial growth factor stimulus [GO:0035924]; endothelial cell proliferation [GO:0001935]; insulin metabolic process [GO:1901142]; intrinsic apoptotic signaling pathway in response to endoplasmic reticulum str…
LC-MS/MS	FCN3	FALSE	Protein	TRUE	FCN3	O75636	O75636	O75636	FCN3_HUMAN	Ficolin-3 (Collagen/fibrinogen domain-containing lectin 3 p35) (Collagen/fibrinogen domain-containing protein 3) (Hakata antigen)	299	3D-structure;Alternative splicing;Calcium;Collagen;Complement activation lectin pathway;Direct protein sequencing;Disulfide bond;Glycoprotein;Hydroxylation;Immunity;Innate immunity;Lectin;Metal-binding;Reference proteome;Repeat;Secreted;Signal	cell surface pattern recognition receptor signaling pathway [GO:0002752]; complement activation [GO:0006956]; complement activation, lectin pathway [GO:0001867]; defense response to virus [GO:0051607]; negative regulation of RNA biosynthetic process [GO:1902679]; negative regulation of viral entry into host cell [GO:0046597]; positive regulation of opsonization [GO:1903028]; proteolysis [GO:00065…
LC-MS/MS	ATRN	FALSE	Protein	TRUE	ATRN	O75882	O75882	O75882	ATRN_HUMAN	Attractin (DPPT-L) (Mahogany homolog)	1429	Alternative splicing;Cell membrane;Direct protein sequencing;Disulfide bond;EGF-like domain;Glycoprotein;Inflammatory response;Kelch repeat;Laminin EGF-like domain;Lectin;Membrane;Receptor;Reference proteome;Repeat;Secreted;Signal;Transmembrane;Transmembrane helix	cerebellum development [GO:0021549]; inflammatory response [GO:0006954]; myelination [GO:0042552]; pigmentation [GO:0043473]; regulation of multicellular organism growth [GO:0040014]
LC-MS/MS	APOM	FALSE	Protein	TRUE	APOM	O95445	O95445	O95445	APOM_HUMAN	Apolipoprotein M (Apo-M) (ApoM) (Protein G3a)	188	3D-structure;Alternative splicing;Direct protein sequencing;Disulfide bond;Glycoprotein;HDL;Lipid transport;Reference proteome;Secreted;Signal;Transport	cholesterol efflux [GO:0033344]; cholesterol homeostasis [GO:0042632]; high-density lipoprotein particle assembly [GO:0034380]; high-density lipoprotein particle clearance [GO:0034384]; high-density lipoprotein particle remodeling [GO:0034375]; lipoprotein metabolic process [GO:0042157]; negative regulation of plasma lipoprotein oxidation [GO:0034445]; reverse cholesterol transport [GO:0043691]
LC-MS/MS	CP	FALSE	Protein	TRUE	CP	P00450	P00450	P00450	CERU_HUMAN	Ceruloplasmin (EC 1.16.3.1) (Ferroxidase)	1065	3D-structure;Copper;Copper transport;Direct protein sequencing;Disulfide bond;Glycoprotein;Ion transport;Metal-binding;Oxidoreductase;Phosphoprotein;Reference proteome;Repeat;Secreted;Signal;Transport	copper ion transport [GO:0006825]; intracellular iron ion homeostasis [GO:0006879]; iron ion transport [GO:0006826]
LC-MS/MS	F13A1	FALSE	Protein	TRUE	F13A1	P00488	P00488	P00488	F13A_HUMAN	Coagulation factor XIII A chain (Coagulation factor XIIIa) (EC 2.3.2.13) (Protein-glutamine gamma-glutamyltransferase A chain) (Transglutaminase A chain)	732	3D-structure;Acetylation;Acyltransferase;Blood coagulation;Calcium;Cytoplasm;Direct protein sequencing;Disease variant;Glycoprotein;Hemostasis;Metal-binding;Reference proteome;Secreted;Transferase;Zymogen	blood coagulation [GO:0007596]; blood coagulation, fibrin clot formation [GO:0072378]; peptide cross-linking [GO:0018149]
LC-MS/MS	F2	FALSE	Protein	TRUE	F2	P00734	P00734	P00734	THRB_HUMAN	Prothrombin (EC 3.4.21.5) (Coagulation factor II) [Cleaved into: Activation peptide fragment 1; Activation peptide fragment 2; Thrombin light chain; Thrombin heavy chain]	622	3D-structure;Acute phase;Blood coagulation;Calcium;Cleavage on pair of basic residues;Direct protein sequencing;Disease variant;Disulfide bond;Gamma-carboxyglutamic acid;Glycoprotein;Hemostasis;Hydrolase;Kringle;Pharmaceutical;Protease;Reference proteome;Repeat;Secreted;Serine protease;Signal;Thrombophilia;Zymogen	acute-phase response [GO:0006953]; antimicrobial humoral immune response mediated by antimicrobial peptide [GO:0061844]; blood coagulation [GO:0007596]; cell surface receptor signaling pathway [GO:0007166]; cytolysis by host of symbiont cells [GO:0051838]; fibrinolysis [GO:0042730]; G protein-coupled receptor signaling pathway [GO:0007186]; ligand-gated ion channel signaling pathway [GO:1990806];…
LC-MS/MS	C1R	FALSE	Protein	TRUE	C1R	P00736	P00736	P00736	C1R_HUMAN	Complement C1r subcomponent (EC 3.4.21.41) (Complement component 1 subcomponent r) [Cleaved into: Complement C1r subcomponent heavy chain; Complement C1r subcomponent light chain]	705	3D-structure;Complement pathway;Direct protein sequencing;Disease variant;Disulfide bond;EGF-like domain;Ehlers-Danlos syndrome;Glycoprotein;Hydrolase;Hydroxylation;Immunity;Innate immunity;Phosphoprotein;Protease;Reference proteome;Repeat;Secreted;Serine protease;Signal;Sushi	complement activation, classical pathway [GO:0006958]; immune response [GO:0006955]; innate immune response [GO:0045087]; zymogen activation [GO:0031638]
LC-MS/MS	HP	FALSE	Protein	TRUE	HP	P00738	P00738	P00738	HPT_HUMAN	Haptoglobin (Zonulin) [Cleaved into: Haptoglobin alpha chain; Haptoglobin beta chain]	406	3D-structure;Acute phase;Alternative splicing;Antibiotic;Antimicrobial;Antioxidant;Direct protein sequencing;Disease variant;Disulfide bond;Glycoprotein;Hemoglobin-binding;Immunity;Reference proteome;Repeat;Secreted;Serine protease homolog;Signal;Sushi	acute-phase response [GO:0006953]; defense response [GO:0006952]; defense response to bacterium [GO:0042742]; immune system process [GO:0002376]; negative regulation of hydrogen peroxide catabolic process [GO:2000296]; negative regulation of oxidoreductase activity [GO:0051354]; response to hydrogen peroxide [GO:0042542]
LC-MS/MS	HPR	FALSE	Protein	TRUE	HPR	P00739	P00739	P00739	HPTR_HUMAN	Haptoglobin-related protein	348	Alternative splicing;Disulfide bond;Hemoglobin-binding;Reference proteome;Secreted;Serine protease homolog;Signal;Sushi
LC-MS/MS	F9	FALSE	Protein	TRUE	F9	P00740	P00740	P00740	FA9_HUMAN	Coagulation factor IX (EC 3.4.21.22) (Christmas factor) (Plasma thromboplastin component) (PTC) [Cleaved into: Coagulation factor IXa light chain; Coagulation factor IXa heavy chain]	461	3D-structure;Alternative splicing;Blood coagulation;Calcium;Cleavage on pair of basic residues;Direct protein sequencing;Disease variant;Disulfide bond;EGF-like domain;Gamma-carboxyglutamic acid;Glycoprotein;Hemophilia;Hemostasis;Hydrolase;Hydroxylation;Magnesium;Metal-binding;Pharmaceutical;Phosphoprotein;Protease;Reference proteome;Repeat;Secreted;Serine protease;Signal;Sulfation;Thrombophilia;…	blood coagulation [GO:0007596]; proteolysis [GO:0006508]; zymogen activation [GO:0031638]
LC-MS/MS	F10	FALSE	Protein	TRUE	F10	P00742	P00742	P00742	FA10_HUMAN	Coagulation factor X (EC 3.4.21.6) (Stuart factor) (Stuart-Prower factor) [Cleaved into: Factor X light chain; Factor X heavy chain; Activated factor Xa heavy chain]	488	3D-structure;Blood coagulation;Calcium;Cleavage on pair of basic residues;Direct protein sequencing;Disease variant;Disulfide bond;EGF-like domain;Gamma-carboxyglutamic acid;Glycoprotein;Hemostasis;Hydrolase;Hydroxylation;Protease;Reference proteome;Repeat;Secreted;Serine protease;Signal;Zymogen	blood coagulation [GO:0007596]; positive regulation of cell migration [GO:0030335]; positive regulation of phosphatidylinositol 3-kinase signaling/protein kinase B signal transduction [GO:0051897]; proteolysis [GO:0006508]
LC-MS/MS	CFD	FALSE	Protein	TRUE	CFD	P00746	P00746	P00746	CFAD_HUMAN	Complement factor D (EC 3.4.21.46) (Adipsin) (C3 convertase activator) (Properdin factor D)	253	3D-structure;Complement alternate pathway;Direct protein sequencing;Disease variant;Disulfide bond;Hydrolase;Immunity;Innate immunity;Protease;Reference proteome;Secreted;Serine protease;Signal;Zymogen	complement activation [GO:0006956]; complement activation, alternative pathway [GO:0006957]; proteolysis [GO:0006508]; response to bacterium [GO:0009617]
LC-MS/MS	PLG	FALSE	Protein	TRUE	PLG	P00747	P00747	P00747	PLMN_HUMAN	Plasminogen (EC 3.4.21.7) [Cleaved into: Plasmin heavy chain A; Activation peptide; Angiostatin; Plasmin heavy chain A, short form; Plasmin light chain B]	810	3D-structure;Blood coagulation;Cleavage on pair of basic residues;Direct protein sequencing;Disease variant;Disulfide bond;Fibrinolysis;Glycoprotein;Hemostasis;Hydrolase;Kringle;Phosphoprotein;Protease;Reference proteome;Repeat;Secreted;Serine protease;Signal;Thrombophilia;Tissue remodeling;Zymogen	biological process involved in interaction with symbiont [GO:0051702]; blood coagulation [GO:0007596]; extracellular matrix disassembly [GO:0022617]; fibrinolysis [GO:0042730]; negative regulation of cell population proliferation [GO:0008285]; negative regulation of cell-cell adhesion mediated by cadherin [GO:2000048]; negative regulation of cell-substrate adhesion [GO:0010812]; negative regulati…
LC-MS/MS	PLG	FALSE	Protein	FALSE	PLGLB1	Q02325	Q02325	Q02325	PLGB_HUMAN	Plasminogen-like protein B (Plasminogen-related protein B)	96	Disulfide bond;Reference proteome;Secreted;Signal
LC-MS/MS	PLG	FALSE	Protein	FALSE	PLGLA	Q15195	Q15195	Q15195	PLGA_HUMAN	Plasminogen-like protein A (Plasminogen-like protein A1) (Plasminogen-related protein A)	96	Disulfide bond;Reference proteome;Secreted;Signal
LC-MS/MS	F12	FALSE	Protein	TRUE	F12	P00748	P00748	P00748	FA12_HUMAN	Coagulation factor XII (EC 3.4.21.38) (Hageman factor) (HAF) [Cleaved into: Coagulation factor XIIa heavy chain; Beta-factor XIIa part 1; Coagulation factor XIIa light chain (Beta-factor XIIa part 2)]	615	3D-structure;Blood coagulation;Direct protein sequencing;Disease variant;Disulfide bond;EGF-like domain;Fibrinolysis;Glycoprotein;Hemostasis;Hydrolase;Kringle;Protease;Reference proteome;Repeat;Secreted;Serine protease;Signal;Zymogen	blood coagulation [GO:0007596]; blood coagulation, intrinsic pathway [GO:0007597]; Factor XII activation [GO:0002542]; fibrinolysis [GO:0042730]; innate immune response [GO:0045087]; plasma kallikrein-kinin cascade [GO:0002353]; positive regulation of blood coagulation [GO:0030194]; positive regulation of fibrinolysis [GO:0051919]; positive regulation of plasminogen activation [GO:0010756]; prote…
LC-MS/MS	CFB	FALSE	Protein	TRUE	CFB	P00751	P00751	P00751	CFAB_HUMAN	Complement factor B (EC 3.4.21.47) (C3/C5 convertase) (Glycine-rich beta glycoprotein) (GBG) (PBF2) (Properdin factor B) [Cleaved into: Complement factor B Ba fragment; Complement factor B Bb fragment]	764	3D-structure;Age-related macular degeneration;Alternative splicing;Cleavage on pair of basic residues;Complement alternate pathway;Direct protein sequencing;Disease variant;Disulfide bond;Glycation;Glycoprotein;Hemolytic uremic syndrome;Hydrolase;Immunity;Innate immunity;Protease;Reference proteome;Repeat;Secreted;Serine protease;Signal;Sushi;Zymogen	complement activation [GO:0006956]; complement activation, alternative pathway [GO:0006957]; proteolysis [GO:0006508]; response to bacterium [GO:0009617]
LC-MS/MS	CA1	FALSE	Protein	TRUE	CA1	P00915	P00915	P00915	CAH1_HUMAN	Carbonic anhydrase 1 (EC 4.2.1.1) (Carbonate dehydratase I) (Carbonic anhydrase B) (CAB) (Carbonic anhydrase I) (CA-I) (Cyanamide hydratase CA1) (EC 4.2.1.69)	261	3D-structure;Acetylation;Cytoplasm;Direct protein sequencing;Lyase;Metal-binding;Reference proteome;Zinc	one-carbon metabolic process [GO:0006730]
LC-MS/MS	CA2	FALSE	Protein	TRUE	CA2	P00918	P00918	P00918	CAH2_HUMAN	Carbonic anhydrase 2 (EC 4.2.1.1) (Carbonate dehydratase II) (Carbonic anhydrase C) (CAC) (Carbonic anhydrase II) (CA-II) (Cyanamide hydratase CA2) (EC 4.2.1.69)	260	3D-structure;Acetylation;Cell membrane;Cytoplasm;Direct protein sequencing;Disease variant;Lyase;Membrane;Metal-binding;Osteopetrosis;Phosphoprotein;Reference proteome;Zinc	angiotensin-activated signaling pathway [GO:0038166]; carbon dioxide transport [GO:0015670]; morphogenesis of an epithelium [GO:0002009]; neuron cellular homeostasis [GO:0070050]; one-carbon metabolic process [GO:0006730]; positive regulation of cellular pH reduction [GO:0032849]; positive regulation of dipeptide transmembrane transport [GO:2001150]; positive regulation of synaptic transmission, …
LC-MS/MS	SERPINC1	FALSE	Protein	TRUE	SERPINC1	P01008	P01008	P01008	ANT3_HUMAN	Antithrombin-III (ATIII) (Serpin C1)	464	3D-structure;Blood coagulation;Direct protein sequencing;Disease variant;Disulfide bond;Glycoprotein;Hemostasis;Heparin-binding;Phosphoprotein;Protease inhibitor;Reference proteome;Secreted;Serine protease inhibitor;Signal;Thrombophilia	blood coagulation [GO:0007596]; regulation of blood coagulation [GO:0030193]
LC-MS/MS	SERPINA1	FALSE	Protein	TRUE	SERPINA1	P01009	P01009	P01009	A1AT_HUMAN	Alpha-1-antitrypsin (Alpha-1 protease inhibitor) (Alpha-1-antiproteinase) (Serpin A1) [Cleaved into: Short peptide from AAT (SPAAT)]	418	3D-structure;Acute phase;Alternative splicing;Blood coagulation;Direct protein sequencing;Endoplasmic reticulum;Extracellular matrix;Glycoprotein;Hemostasis;Phosphoprotein;Protease inhibitor;Reference proteome;Secreted;Serine protease inhibitor;Signal	acute-phase response [GO:0006953]; blood coagulation [GO:0007596]
LC-MS/MS	SERPINA3	FALSE	Protein	TRUE	SERPINA3	P01011	P01011	P01011	AACT_HUMAN	Alpha-1-antichymotrypsin (ACT) (Cell growth-inhibiting gene 24/25 protein) (Serpin A3) [Cleaved into: Alpha-1-antichymotrypsin His-Pro-less]	423	3D-structure;Acute phase;Alternative splicing;Direct protein sequencing;Disease variant;Glycoprotein;Protease inhibitor;Reference proteome;Secreted;Serine protease inhibitor;Signal	acute-phase response [GO:0006953]; inflammatory response [GO:0006954]; maintenance of gastrointestinal epithelium [GO:0030277]; regulation of lipid metabolic process [GO:0019216]
LC-MS/MS	AGT	FALSE	Protein	TRUE	AGT	P01019	P01019	P01019	ANGT_HUMAN	Angiotensinogen (Serpin A8) [Cleaved into: Angiotensin-1 (Angiotensin 1-10) (Angiotensin I) (Ang I); Angiotensin-2 (Angiotensin 1-8) (Angiotensin II) (Ang II); Angiotensin-3 (Angiotensin 2-8) (Angiotensin III) (Ang III) (Des-Asp[1]-angiotensin II); Angiotensin-4 (Angiotensin 3-8) (Angiotensin IV) (Ang IV); Angiotensin 1-9; Angiotensin 1-7; Angiotensin 1-5; Angiotensin 1-4]	485	3D-structure;Direct protein sequencing;Disease variant;Disulfide bond;Glycoprotein;Reference proteome;Secreted;Signal;Vasoactive;Vasoconstrictor	angiotensin-activated signaling pathway [GO:0038166]; blood vessel remodeling [GO:0001974]; cell-cell signaling [GO:0007267]; G protein-coupled receptor signaling pathway [GO:0007186]; G protein-coupled receptor signaling pathway coupled to cGMP nucleotide second messenger [GO:0007199]; kidney development [GO:0001822]; low-density lipoprotein particle remodeling [GO:0034374]; maintenance of blood…
LC-MS/MS	A2M	TRUE	Protein	TRUE	A2M	P01023	P01023	P01023	A2MG_HUMAN	Alpha-2-macroglobulin (Alpha-2-M) (C3 and PZP-like alpha-2-macroglobulin domain-containing protein 5)	1474	3D-structure;Bait region;Direct protein sequencing;Disulfide bond;Glycoprotein;Isopeptide bond;Protease inhibitor;Reference proteome;Secreted;Serine protease inhibitor;Signal;Thioester bond	acute inflammatory response to antigenic stimulus [GO:0002438]; acute-phase response [GO:0006953]; embryonic liver development [GO:1990402]; luteinization [GO:0001553]; negative regulation of complement activation, lectin pathway [GO:0001869]; response to carbon dioxide [GO:0010037]; response to glucocorticoid [GO:0051384]; response to nutrient [GO:0007584]; response to prostaglandin E [GO:003469…
LC-MS/MS	C3	FALSE	Protein	TRUE	C3	P01024	P01024	P01024	CO3_HUMAN	Complement C3 (C3 and PZP-like alpha-2-macroglobulin domain-containing protein 1) [Cleaved into: Complement C3 beta chain; C3-beta-c (C3bc); Complement C3 alpha chain; C3a anaphylatoxin; Acylation stimulating protein (ASP) (C3adesArg); Complement C3b alpha' chain; Complement C3c alpha' chain fragment 1; Complement C3dg fragment; Complement C3g fragment; Complement C3d fragment; Complement C3f fra…	1663	3D-structure;Age-related macular degeneration;Cleavage on pair of basic residues;Complement alternate pathway;Complement pathway;Direct protein sequencing;Disease variant;Disulfide bond;Fatty acid metabolism;Glycoprotein;Hemolytic uremic syndrome;Immunity;Inflammatory response;Innate immunity;Lipid metabolism;Phosphoprotein;Reference proteome;Secreted;Signal;Thioester bond	amyloid-beta clearance [GO:0097242]; cell surface receptor signaling pathway involved in cell-cell signaling [GO:1905114]; complement activation [GO:0006956]; complement activation, alternative pathway [GO:0006957]; complement activation, classical pathway [GO:0006958]; complement-dependent cytotoxicity [GO:0097278]; complement-mediated synapse pruning [GO:0150062]; fatty acid metabolic process […
LC-MS/MS	C3	FALSE	Protein	FALSE	METTL18	O95568	O95568	O95568	MET18_HUMAN	Histidine protein methyltransferase 1 homolog (EC 2.1.1.85) (Arsenic-transactivated protein 2) (AsTP2) (Methyltransferase-like protein 18)	372	3D-structure;Cytoplasm;Methylation;Methyltransferase;Nucleus;Phosphoprotein;Reference proteome;S-adenosyl-L-methionine;Transferase	peptidyl-lysine monomethylation [GO:0018026]; regulation of ribosome biogenesis [GO:0090069]; regulation of rRNA processing [GO:2000232]; regulation of translation [GO:0006417]; regulation of translational elongation [GO:0006448]
LC-MS/MS	C5	FALSE	Protein	TRUE	C5	P01031	P01031	P01031	CO5_HUMAN	Complement C5 (C3 and PZP-like alpha-2-macroglobulin domain-containing protein 4) [Cleaved into: Complement C5 beta chain; Complement C5 alpha chain; C5a anaphylatoxin; Complement C5 alpha' chain]	1676	3D-structure;Cleavage on pair of basic residues;Complement alternate pathway;Complement pathway;Cytolysis;Direct protein sequencing;Disulfide bond;Glycoprotein;Immunity;Inflammatory response;Innate immunity;Membrane attack complex;Reference proteome;Secreted;Signal	cell surface receptor signaling pathway [GO:0007166]; chemotaxis [GO:0006935]; complement activation, alternative pathway [GO:0006957]; complement activation, classical pathway [GO:0006958]; G protein-coupled receptor signaling pathway [GO:0007186]; inflammatory response [GO:0006954]; killing of cells of another organism [GO:0031640]; negative regulation of macrophage chemotaxis [GO:0010760]; pos…
LC-MS/MS	CST3	FALSE	Protein	TRUE	CST3	P01034	P01034	P01034	CYTC_HUMAN	Cystatin-C (Cystatin-3) (Gamma-trace) (Neuroendocrine basic polypeptide) (Post-gamma-globulin)	146	3D-structure;Age-related macular degeneration;Amyloid;Amyloidosis;Direct protein sequencing;Disease variant;Disulfide bond;Glycoprotein;Phosphoprotein;Protease inhibitor;Reference proteome;Secreted;Signal;Thiol protease inhibitor	defense response [GO:0006952]; negative regulation of blood vessel remodeling [GO:0060313]; negative regulation of collagen catabolic process [GO:0010711]; negative regulation of elastin catabolic process [GO:0060311]; negative regulation of extracellular matrix disassembly [GO:0010716]; negative regulation of peptidase activity [GO:0010466]; negative regulation of proteolysis [GO:0045861]; regul…
LC-MS/MS	KNG1	FALSE	Protein	TRUE	KNG1	P01042	P01042	P01042	KNG1_HUMAN	Kininogen-1 (Alpha-2-thiol proteinase inhibitor) (Fitzgerald factor) (High molecular weight kininogen) (HMWK) (Williams-Fitzgerald-Flaujeac factor) [Cleaved into: Kininogen-1 heavy chain; T-kinin (Ile-Ser-Bradykinin); Bradykinin (Kallidin I); Lysyl-bradykinin (Kallidin II); Kininogen-1 light chain; Low molecular weight growth-promoting factor]	644	3D-structure;Alternative splicing;Blood coagulation;Direct protein sequencing;Disease variant;Disulfide bond;Glycoprotein;Hemostasis;Hydroxylation;Inflammatory response;Phosphoprotein;Protease inhibitor;Pyrrolidone carboxylic acid;Reference proteome;Repeat;Secreted;Signal;Thiol protease inhibitor;Vasoactive;Vasodilator	blood coagulation [GO:0007596]; inflammatory response [GO:0006954]; negative regulation of blood coagulation [GO:0030195]; negative regulation of cell adhesion [GO:0007162]; negative regulation of proteolysis [GO:0045861]; positive regulation of apoptotic process [GO:0043065]; positive regulation of cytosolic calcium ion concentration [GO:0007204]; vasodilation [GO:0042311]
LC-MS/MS	IGF2	FALSE	Protein	TRUE	IGF2	P01344	P01344	P01344	IGF2_HUMAN	Insulin-like growth factor II (IGF-II) (Somatomedin-A) (T3M-11-derived growth factor) [Cleaved into: Insulin-like growth factor II; Insulin-like growth factor II Ala-25 Del; Preptin]	180	3D-structure;Alternative splicing;Carbohydrate metabolism;Cleavage on pair of basic residues;Direct protein sequencing;Disease variant;Disulfide bond;Dwarfism;Glucose metabolism;Glycoprotein;Growth factor;Hormone;Mitogen;Osteogenesis;Reference proteome;Secreted;Signal	animal organ morphogenesis [GO:0009887]; embryonic placenta development [GO:0001892]; embryonic placenta morphogenesis [GO:0060669]; exocrine pancreas development [GO:0031017]; glucose metabolic process [GO:0006006]; in utero embryonic development [GO:0001701]; insulin receptor signaling pathway [GO:0008286]; insulin receptor signaling pathway via phosphatidylinositol 3-kinase [GO:0038028]; insul…
LC-MS/MS	JCHAIN	FALSE	Ig peptide	TRUE	JCHAIN	P01591	P01591	P01591	IGJ_HUMAN	Immunoglobulin J chain (Joining chain of multimeric IgA and IgM)	159	3D-structure;Direct protein sequencing;Disulfide bond;Glycoprotein;Pyrrolidone carboxylic acid;Reference proteome;Secreted;Signal	adaptive immune response [GO:0002250]; antibacterial humoral response [GO:0019731]; glomerular filtration [GO:0003094]; humoral immune response [GO:0006959]; immune response [GO:0006955]; innate immune response [GO:0045087]; positive regulation of respiratory burst [GO:0060267]; protein-containing complex assembly [GO:0065003]; retina homeostasis [GO:0001895]
LC-MS/MS	IGKV1D-33	FALSE	Ig peptide	TRUE	IGKV1-33	P01594	P01594	P01594	KV133_HUMAN	Immunoglobulin kappa variable 1-33 (Ig kappa chain V-I region AU) (Ig kappa chain V-I region Ka)	117	3D-structure;Adaptive immunity;Bence-Jones protein;Cell membrane;Direct protein sequencing;Disulfide bond;Immunity;Immunoglobulin;Immunoglobulin domain;Membrane;Reference proteome;Secreted;Signal	adaptive immune response [GO:0002250]; immune response [GO:0006955]
LC-MS/MS	IGKV1D-33	FALSE	Ig peptide	FALSE	IGKV1D-33	P01593	P01593	P01593	KVD33_HUMAN	Immunoglobulin kappa variable 1D-33 (Ig kappa chain V-I region AG) (Ig kappa chain V-I region Bi) (Ig kappa chain V-I region Lay) (Ig kappa chain V-I region Ni) (Ig kappa chain V-I region Rei) (Ig kappa chain V-I region Roy) (Ig kappa chain V-I region Scw) (Ig kappa chain V-I region WAT)	117	3D-structure;Adaptive immunity;Cell membrane;Direct protein sequencing;Disulfide bond;Immunity;Immunoglobulin;Immunoglobulin domain;Membrane;Reference proteome;Secreted;Signal	adaptive immune response [GO:0002250]; immune response [GO:0006955]
LC-MS/MS	IGKV1-17	FALSE	Ig peptide	TRUE	IGKV1-17	P01599	P01599	P01599	KV117_HUMAN	Immunoglobulin kappa variable 1-17 (Ig kappa chain V-I region Gal) (Ig kappa chain V-I region WEA)	117	Adaptive immunity;Cell membrane;Direct protein sequencing;Disulfide bond;Immunity;Immunoglobulin;Immunoglobulin domain;Membrane;Reference proteome;Secreted;Signal	adaptive immune response [GO:0002250]; immune response [GO:0006955]
LC-MS/MS	IGKV1D-16	FALSE	Ig peptide	TRUE	IGKV1D-16	P01601	P01601	P01601	KVD16_HUMAN	Immunoglobulin kappa variable 1D-16 (Ig kappa chain V-I region HK146) (Ig kappa chain V-I region HK189)	117	Adaptive immunity;Cell membrane;Disulfide bond;Immunity;Immunoglobulin;Immunoglobulin domain;Membrane;Reference proteome;Secreted;Signal	adaptive immune response [GO:0002250]; immune response [GO:0006955]
LC-MS/MS	IGKV1-5	FALSE	Ig peptide	TRUE	IGKV1-5	P01602	P01602	P01602	KV105_HUMAN	Immunoglobulin kappa variable 1-5 (Ig kappa chain V-I region CAR) (Ig kappa chain V-I region EU) (Ig kappa chain V-I region HK102) (Ig kappa chain V-I region Kue)	117	Adaptive immunity;Cell membrane;Direct protein sequencing;Disulfide bond;Immunity;Immunoglobulin;Immunoglobulin domain;Membrane;Reference proteome;Secreted;Signal	adaptive immune response [GO:0002250]; immune response [GO:0006955]
LC-MS/MS	IGKV3[D]-20	FALSE	Ig peptide	TRUE	IGKV3-20	P01619	P01619	P01619	KV320_HUMAN	Immunoglobulin kappa variable 3-20 (Ig kappa chain V-III region B6) (Ig kappa chain V-III region GOL) (Ig kappa chain V-III region HAH) (Ig kappa chain V-III region HIC) (Ig kappa chain V-III region IARC/BL41) (Ig kappa chain V-III region NG9) (Ig kappa chain V-III region SIE) (Ig kappa chain V-III region Ti) (Ig kappa chain V-III region WOL)	116	3D-structure;Adaptive immunity;Cell membrane;Direct protein sequencing;Disulfide bond;Immunity;Immunoglobulin;Immunoglobulin domain;Membrane;Reference proteome;Secreted;Signal	adaptive immune response [GO:0002250]; antibacterial humoral response [GO:0019731]; glomerular filtration [GO:0003094]; immune response [GO:0006955]
LC-MS/MS	IGKV3[D]-20	FALSE	Ig peptide	FALSE	IGKV3D-20	A0A0C4DH25	A0A0C4DH25	A0A0C4DH25	KVD20_HUMAN	Immunoglobulin kappa variable 3D-20	116	Adaptive immunity;Cell membrane;Disulfide bond;Immunity;Immunoglobulin;Immunoglobulin domain;Membrane;Reference proteome;Secreted;Signal	adaptive immune response [GO:0002250]; immune response [GO:0006955]
LC-MS/MS	IGKV3[D]-15/7	FALSE	Ig peptide	TRUE	IGKV3-15	P01624	P01624	P01624	KV315_HUMAN	Immunoglobulin kappa variable 3-15 (Ig kappa chain V-III region CLL) (Ig kappa chain V-III region POM)	115	Adaptive immunity;Cell membrane;Direct protein sequencing;Disulfide bond;Immunity;Immunoglobulin;Immunoglobulin domain;Membrane;Reference proteome;Secreted;Signal	adaptive immune response [GO:0002250]; immune response [GO:0006955]
LC-MS/MS	IGKV3[D]-15/7	FALSE	Ig peptide	FALSE	IGKV3D-15	A0A087WSY6	A0A087WSY6	A0A087WSY6	KVD15_HUMAN	Immunoglobulin kappa variable 3D-15	115	Adaptive immunity;Cell membrane;Disulfide bond;Immunity;Immunoglobulin;Immunoglobulin domain;Membrane;Reference proteome;Secreted;Signal	adaptive immune response [GO:0002250]; immune response [GO:0006955]
LC-MS/MS	IGKV3[D]-15/7	FALSE	Ig peptide	FALSE	IGKV3D-7	A0A0C4DH55	A0A0C4DH55	A0A0C4DH55	KVD07_HUMAN	Immunoglobulin kappa variable 3D-7	119	Adaptive immunity;Cell membrane;Disulfide bond;Immunity;Immunoglobulin;Immunoglobulin domain;Membrane;Reference proteome;Secreted;Signal	adaptive immune response [GO:0002250]; immune response [GO:0006955]
LC-MS/MS	IGLV1-44	FALSE	Ig peptide	TRUE	IGLV1-44	P01699	P01699	P01699	LV144_HUMAN	Immunoglobulin lambda variable 1-44 (Ig lambda chain V-I region MEM) (Ig lambda chain V-I region VOR)	117	Adaptive immunity;Cell membrane;Direct protein sequencing;Disulfide bond;Immunity;Immunoglobulin;Immunoglobulin domain;Membrane;Pyrrolidone carboxylic acid;Reference proteome;Secreted;Signal	adaptive immune response [GO:0002250]; immune response [GO:0006955]
LC-MS/MS	IGLV1-47	FALSE	Ig peptide	TRUE	IGLV1-47	P01700	P01700	P01700	LV147_HUMAN	Immunoglobulin lambda variable 1-47 (Ig lambda chain V-I region HA) (Ig lambda chain V-I region WAH)	117	3D-structure;Adaptive immunity;Cell membrane;Direct protein sequencing;Disulfide bond;Immunity;Immunoglobulin;Immunoglobulin domain;Membrane;Pyrrolidone carboxylic acid;Reference proteome;Secreted;Signal	adaptive immune response [GO:0002250]; immune response [GO:0006955]
LC-MS/MS	IGLV1-51	FALSE	Ig peptide	TRUE	IGLV1-51	P01701	P01701	P01701	LV151_HUMAN	Immunoglobulin lambda variable 1-51 (Ig lambda chain V-I region BL2) (Ig lambda chain V-I region EPS) (Ig lambda chain V-I region NEW) (Ig lambda chain V-I region NIG-64)	117	Adaptive immunity;Cell membrane;Direct protein sequencing;Disulfide bond;Immunity;Immunoglobulin;Immunoglobulin domain;Membrane;Pyrrolidone carboxylic acid;Reference proteome;Secreted;Signal	adaptive immune response [GO:0002250]; immune response [GO:0006955]
LC-MS/MS	IGLV1-40	FALSE	Ig peptide	TRUE	IGLV1-40	P01703	P01703	P01703	LV140_HUMAN	Immunoglobulin lambda variable 1-40 (Ig lambda chain V-I region NEWM)	118	Adaptive immunity;Cell membrane;Direct protein sequencing;Disulfide bond;Immunity;Immunoglobulin;Immunoglobulin domain;Membrane;Pyrrolidone carboxylic acid;Reference proteome;Secreted;Signal	adaptive immune response [GO:0002250]; immune response [GO:0006955]
LC-MS/MS	IGLV2-11	FALSE	Ig peptide	TRUE	IGLV2-11	P01706	P01706	P01706	LV211_HUMAN	Immunoglobulin lambda variable 2-11 (Ig gamma lambda chain V-II region DOT) (Ig lambda chain V-II region BOH) (Ig lambda chain V-II region BUR) (Ig lambda chain V-II region NIG-58) (Ig lambda chain V-II region TRO) (Ig lambda chain V-II region WIN)	119	Adaptive immunity;Cell membrane;Direct protein sequencing;Disulfide bond;Immunity;Immunoglobulin;Immunoglobulin domain;Membrane;Pyrrolidone carboxylic acid;Reference proteome;Secreted;Signal	adaptive immune response [GO:0002250]; immune response [GO:0006955]
LC-MS/MS	IGLV3-19	FALSE	Ig peptide	TRUE	IGLV3-19	P01714	P01714	P01714	LV319_HUMAN	Immunoglobulin lambda variable 3-19 (Ig lambda chain V-III region SH)	112	3D-structure;Adaptive immunity;Cell membrane;Direct protein sequencing;Disulfide bond;Immunity;Immunoglobulin;Immunoglobulin domain;Membrane;Reference proteome;Secreted;Signal	adaptive immune response [GO:0002250]; immune response [GO:0006955]
LC-MS/MS	IGLV3-1	FALSE	Ig peptide	TRUE	IGLV3-1	P01715	P01715	P01715	LV301_HUMAN	Immunoglobulin lambda variable 3-1 (Ig lambda chain V-IV region Bau) (Ig lambda chain V-IV region MOL) (Ig lambda chain V-IV region X)	115	Adaptive immunity;Cell membrane;Direct protein sequencing;Disulfide bond;Immunity;Immunoglobulin;Immunoglobulin domain;Membrane;Reference proteome;Secreted;Signal	adaptive immune response [GO:0002250]; immune response [GO:0006955]
LC-MS/MS	IGLV3-25	FALSE	Ig peptide	TRUE	IGLV3-25	P01717	P01717	P01717	LV325_HUMAN	Immunoglobulin lambda variable 3-25 (Ig lambda chain V-IV region Hil)	112	Adaptive immunity;Cell membrane;Direct protein sequencing;Disulfide bond;Immunity;Immunoglobulin;Immunoglobulin domain;Membrane;Reference proteome;Secreted;Signal	adaptive immune response [GO:0002250]; immune response [GO:0006955]
LC-MS/MS	IGLV6-57	FALSE	Ig peptide	TRUE	IGLV6-57	P01721	P01721	P01721	LV657_HUMAN	Immunoglobulin lambda variable 6-57 (Ig lambda chain V-VI region AR) (Ig lambda chain V-VI region EB4) (Ig lambda chain V-VI region NIG-48) (Ig lambda chain V-VI region SUT) (Ig lambda chain V-VI region WLT)	117	3D-structure;Adaptive immunity;Cell membrane;Direct protein sequencing;Disulfide bond;Immunity;Immunoglobulin;Immunoglobulin domain;Membrane;Reference proteome;Secreted;Signal	adaptive immune response [GO:0002250]; immune response [GO:0006955]
LC-MS/MS	IGHV1-69	FALSE	Ig peptide	TRUE	IGHV1-69	P01742	P01742	P01742	HV169_HUMAN	Immunoglobulin heavy variable 1-69 (Ig heavy chain V-I region EU) (Ig heavy chain V-I region SIE) (Ig heavy chain V-I region WOL)	117	Adaptive immunity;Cell membrane;Direct protein sequencing;Disulfide bond;Immunity;Immunoglobulin;Immunoglobulin domain;Membrane;Pyrrolidone carboxylic acid;Reference proteome;Secreted;Signal	immune response [GO:0006955]; immunoglobulin mediated immune response [GO:0016064]
LC-MS/MS	IGHV1-46	FALSE	Ig peptide	TRUE	IGHV1-46	P01743	P01743	P01743	HV146_HUMAN	Immunoglobulin heavy variable 1-46 (Ig heavy chain V-I region DOT) (Ig heavy chain V-I region HG3) (Ig heavy chain V-I region Mot)	117	Adaptive immunity;Cell membrane;Direct protein sequencing;Disulfide bond;Immunity;Immunoglobulin;Immunoglobulin domain;Membrane;Reference proteome;Secreted;Signal	immune response [GO:0006955]; immunoglobulin mediated immune response [GO:0016064]
LC-MS/MS	IGHV3-23	FALSE	Ig peptide	TRUE	IGHV3-23	P01764	P01764	P01764	HV323_HUMAN	Immunoglobulin heavy variable 3-23 (Ig heavy chain V-III region LAY) (Ig heavy chain V-III region POM) (Ig heavy chain V-III region TEI) (Ig heavy chain V-III region TIL) (Ig heavy chain V-III region TUR) (Ig heavy chain V-III region VH26) (Ig heavy chain V-III region WAS) (Ig heavy chain V-III region ZAP)	117	3D-structure;Adaptive immunity;Cell membrane;Direct protein sequencing;Disulfide bond;Immunity;Immunoglobulin;Immunoglobulin domain;Membrane;Reference proteome;Secreted;Signal	immune response [GO:0006955]; immunoglobulin mediated immune response [GO:0016064]
LC-MS/MS	IGHV3-13	FALSE	Ig peptide	TRUE	IGHV3-13	P01766	P01766	P01766	HV313_HUMAN	Immunoglobulin heavy variable 3-13 (Ig heavy chain V-III region BRO)	116	Adaptive immunity;Cell membrane;Direct protein sequencing;Disulfide bond;Immunity;Immunoglobulin;Immunoglobulin domain;Membrane;Reference proteome;Secreted;Signal	immune response [GO:0006955]; immunoglobulin mediated immune response [GO:0016064]
LC-MS/MS	IGHV3-33	FALSE	Ig peptide	TRUE	IGHV3-33	P01772	P01772	P01772	HV333_HUMAN	Immunoglobulin heavy variable 3-33 (Ig heavy chain V-III region HIL) (Ig heavy chain V-III region KOL)	117	3D-structure;Adaptive immunity;Cell membrane;Direct protein sequencing;Disulfide bond;Immunity;Immunoglobulin;Immunoglobulin domain;Membrane;Pyrrolidone carboxylic acid;Reference proteome;Secreted;Signal	immune response [GO:0006955]; immunoglobulin mediated immune response [GO:0016064]
LC-MS/MS	IGHV3-7	FALSE	Ig peptide	TRUE	IGHV3-7	P01780	P01780	P01780	HV307_HUMAN	Immunoglobulin heavy variable 3-7 (Ig heavy chain V-III region GAL) (Ig heavy chain V-III region GAR) (Ig heavy chain V-III region JON)	117	3D-structure;Adaptive immunity;Cell membrane;Direct protein sequencing;Disulfide bond;Immunity;Immunoglobulin;Immunoglobulin domain;Membrane;Reference proteome;Secreted;Signal	immune response [GO:0006955]; immunoglobulin mediated immune response [GO:0016064]
LC-MS/MS	IGHV3-[9,43D]	FALSE	Ig peptide	TRUE	IGHV3-9	P01782	P01782	P01782	HV309_HUMAN	Immunoglobulin heavy variable 3-9 (Ig heavy chain V-III region DOB)	118	Adaptive immunity;Cell membrane;Direct protein sequencing;Disulfide bond;Immunity;Immunoglobulin;Immunoglobulin domain;Membrane;Reference proteome;Secreted;Signal	immune response [GO:0006955]; immunoglobulin mediated immune response [GO:0016064]
LC-MS/MS	IGHV3-[9,43D]	FALSE	Ig peptide	FALSE	IGHV3-43D	P0DP04	P0DP04	P0DP04	HV43D_HUMAN	Immunoglobulin heavy variable 3-43D	118	Adaptive immunity;Cell membrane;Disulfide bond;Immunity;Immunoglobulin;Immunoglobulin domain;Membrane;Reference proteome;Secreted;Signal	immunoglobulin mediated immune response [GO:0016064]
LC-MS/MS	IGHV2-5	FALSE	Ig peptide	TRUE	IGHV2-5	P01817	P01817	P01817	HV205_HUMAN	Immunoglobulin heavy variable 2-5 (Ig heavy chain V-II region HE) (Ig heavy chain V-II region MCE)	119	Adaptive immunity;Cell membrane;Direct protein sequencing;Disulfide bond;Immunity;Immunoglobulin;Immunoglobulin domain;Membrane;Pyrrolidone carboxylic acid;Reference proteome;Secreted;Signal	immune response [GO:0006955]; immunoglobulin mediated immune response [GO:0016064]
LC-MS/MS	PIGR	FALSE	Protein	TRUE	PIGR	P01833	P01833	P01833	PIGR_HUMAN	Polymeric immunoglobulin receptor (PIgR) (Poly-Ig receptor) (Hepatocellular carcinoma-associated protein TB6) [Cleaved into: Secretory component]	764	3D-structure;Cell membrane;Direct protein sequencing;Disulfide bond;Glycoprotein;Immunoglobulin domain;Membrane;Phosphoprotein;Reference proteome;Repeat;Secreted;Signal;Transmembrane;Transmembrane helix	detection of chemical stimulus involved in sensory perception of bitter taste [GO:0001580]; epidermal growth factor receptor signaling pathway [GO:0007173]; Fc receptor signaling pathway [GO:0038093]; immunoglobulin transcytosis in epithelial cells mediated by polymeric immunoglobulin receptor [GO:0002415]; receptor clustering [GO:0043113]; retina homeostasis [GO:0001895]
LC-MS/MS	IGK[C]	FALSE	Ig peptide	TRUE	IGKC	P01834	P01834	P01834	IGKC_HUMAN	Immunoglobulin kappa constant (Ig kappa chain C region) (Ig kappa chain C region AG) (Ig kappa chain C region CUM) (Ig kappa chain C region EU) (Ig kappa chain C region OU) (Ig kappa chain C region ROY) (Ig kappa chain C region TI)	107	3D-structure;Adaptive immunity;Cell membrane;Direct protein sequencing;Disease variant;Disulfide bond;Immunity;Immunoglobulin;Immunoglobulin domain;Membrane;Reference proteome;Secreted	adaptive immune response [GO:0002250]; B cell receptor signaling pathway [GO:0050853]; immune response [GO:0006955]; immunoglobulin mediated immune response [GO:0016064]; retina homeostasis [GO:0001895]
LC-MS/MS	IGK[C]	FALSE	Ig peptide	FALSE		P0DOX7	P0DOX7	P0DOX7	IGK_HUMAN	Immunoglobulin kappa light chain (Immunoglobulin kappa light chain EU)	214	3D-structure;Adaptive immunity;Cell membrane;Direct protein sequencing;Disulfide bond;Immunity;Immunoglobulin;Immunoglobulin domain;Membrane;Repeat;Secreted	adaptive immune response [GO:0002250]
LC-MS/MS	IGHG2	FALSE	Ig peptide	TRUE	IGHG2	P01859	P01859	P01859	IGHG2_HUMAN	Immunoglobulin heavy constant gamma 2 (Ig gamma-2 chain C region) (Ig gamma-2 chain C region DOT) (Ig gamma-2 chain C region TIL) (Ig gamma-2 chain C region ZIE)	395	3D-structure;Adaptive immunity;Alternative splicing;Cell membrane;Direct protein sequencing;Disulfide bond;Glycoprotein;Immunity;Immunoglobulin;Immunoglobulin domain;Membrane;Reference proteome;Secreted;Transmembrane;Transmembrane helix	adaptive immune response [GO:0002250]; antibacterial humoral response [GO:0019731]; B cell receptor signaling pathway [GO:0050853]; complement activation, classical pathway [GO:0006958]
LC-MS/MS	IGHG3	FALSE	Ig peptide	TRUE	IGHG3	P01860	P01860	P01860	IGHG3_HUMAN	Immunoglobulin heavy constant gamma 3 (HDC) (Heavy chain disease protein) (Ig gamma-3 chain C region)	446	3D-structure;Adaptive immunity;Alternative splicing;Cell membrane;Direct protein sequencing;Disulfide bond;Glycoprotein;Immunity;Immunoglobulin;Immunoglobulin domain;Membrane;Reference proteome;Repeat;Secreted;Transmembrane;Transmembrane helix	adaptive immune response [GO:0002250]; antibacterial humoral response [GO:0019731]; B cell receptor signaling pathway [GO:0050853]; complement activation, classical pathway [GO:0006958]; retina homeostasis [GO:0001895]
LC-MS/MS	IGHG4	FALSE	Ig peptide	TRUE	IGHG4	P01861	P01861	P01861	IGHG4_HUMAN	Immunoglobulin heavy constant gamma 4 (Ig gamma-4 chain C region)	396	3D-structure;Adaptive immunity;Alternative splicing;Cell membrane;Direct protein sequencing;Disulfide bond;Glycoprotein;Immunity;Immunoglobulin;Immunoglobulin domain;Membrane;Reference proteome;Secreted;Transmembrane;Transmembrane helix	adaptive immune response [GO:0002250]; antibacterial humoral response [GO:0019731]; B cell receptor signaling pathway [GO:0050853]; complement activation, classical pathway [GO:0006958]
LC-MS/MS	IG[H]M	FALSE	Ig peptide	TRUE	IGHM	P01871	P01871	P01871	IGHM_HUMAN	Immunoglobulin heavy constant mu (Ig mu chain C region) (Ig mu chain C region BOT) (Ig mu chain C region GAL) (Ig mu chain C region OU)	474	3D-structure;Adaptive immunity;Alternative splicing;Cell membrane;Direct protein sequencing;Disulfide bond;Glycoprotein;Immunity;Immunoglobulin;Immunoglobulin domain;Membrane;Reference proteome;Secreted;Transmembrane;Transmembrane helix	adaptive immune response [GO:0002250]; antibacterial humoral response [GO:0019731]; B cell receptor signaling pathway [GO:0050853]; complement activation, classical pathway [GO:0006958]; defense response to Gram-negative bacterium [GO:0050829]; innate immune response [GO:0045087]
LC-MS/MS	IG[H]M	FALSE	Ig peptide	FALSE		P0DOX6	P0DOX6	P0DOX6	IGM_HUMAN	Immunoglobulin mu heavy chain (Immunoglobulin mu heavy chain OU)	576	Adaptive immunity;Cell membrane;Direct protein sequencing;Disulfide bond;Glycoprotein;Immunity;Immunoglobulin;Immunoglobulin domain;Membrane;Pyrrolidone carboxylic acid;Repeat;Secreted	adaptive immune response [GO:0002250]
LC-MS/MS	IGHA1	FALSE	Ig peptide	TRUE	IGHA1	P01876	P01876	P01876	IGHA1_HUMAN	Immunoglobulin heavy constant alpha 1 (Ig alpha-1 chain C region) (Ig alpha-1 chain C region BUR) (Ig alpha-1 chain C region TRO)	398	3D-structure;Adaptive immunity;Alternative splicing;Cell membrane;Chromophore;Chromosomal rearrangement;Direct protein sequencing;Disulfide bond;Glycoprotein;Immunity;Immunoglobulin;Immunoglobulin domain;Membrane;Reference proteome;Secreted;Transmembrane;Transmembrane helix	adaptive immune response [GO:0002250]; antibacterial humoral response [GO:0019731]; B cell receptor signaling pathway [GO:0050853]; complement activation, classical pathway [GO:0006958]; glomerular filtration [GO:0003094]; immune response [GO:0006955]; positive regulation of respiratory burst [GO:0060267]; retina homeostasis [GO:0001895]
LC-MS/MS	IG[H]D	FALSE	Ig peptide	TRUE	IGHD	P01880	P01880	P01880	IGHD_HUMAN	Immunoglobulin heavy constant delta (Ig delta chain C region) (Ig delta chain C region NIG-65) (Ig delta chain C region WAH)	430	3D-structure;Adaptive immunity;Alternative splicing;Cell membrane;Direct protein sequencing;Disulfide bond;Glycoprotein;Immunity;Immunoglobulin;Immunoglobulin domain;Membrane;Reference proteome;Secreted;Transmembrane;Transmembrane helix	adaptive immune response [GO:0002250]; B cell receptor signaling pathway [GO:0050853]; immune response [GO:0006955]; immunoglobulin mediated immune response [GO:0016064]; positive regulation of interleukin-1 production [GO:0032732]
LC-MS/MS	IG[H]D	FALSE	Ig peptide	FALSE		P0DOX3	P0DOX3	P0DOX3	IGD_HUMAN	Immunoglobulin delta heavy chain (Immunoglobulin delta heavy chain WAH)	512	3D-structure;Adaptive immunity;Cell membrane;Direct protein sequencing;Disulfide bond;Glycoprotein;Immunity;Immunoglobulin;Immunoglobulin domain;Membrane;Secreted	adaptive immune response [GO:0002250]; monocyte activation [GO:0042117]; positive regulation of interleukin-1 beta production [GO:0032731]; positive regulation of interleukin-1 production [GO:0032732]; positive regulation of tumor necrosis factor production [GO:0032760]
LC-MS/MS	HB[D,E1]	FALSE	Protein	TRUE	HBD	P02042	P02042	P02042	HBD_HUMAN	Hemoglobin subunit delta (Delta-globin) (Hemoglobin delta chain)	147	3D-structure;Acetylation;Direct protein sequencing;Heme;Iron;Metal-binding;Oxygen transport;Phosphoprotein;Reference proteome;Transport	carbon dioxide transport [GO:0015670]; cellular oxidant detoxification [GO:0098869]; hydrogen peroxide catabolic process [GO:0042744]; oxygen transport [GO:0015671]
LC-MS/MS	HB[D,E1]	FALSE	Protein	FALSE	HBE1	P02100	P02100	P02100	HBE_HUMAN	Hemoglobin subunit epsilon (Epsilon-globin) (Hemoglobin epsilon chain)	147	3D-structure;Direct protein sequencing;Heme;Iron;Metal-binding;Oxygen transport;Phosphoprotein;Reference proteome;Transport	carbon dioxide transport [GO:0015670]; cellular oxidant detoxification [GO:0098869]; hydrogen peroxide catabolic process [GO:0042744]; oxygen transport [GO:0015671]; response to organic cyclic compound [GO:0014070]
LC-MS/MS	APOA1	FALSE	Protein	TRUE	APOA1	P02647	P02647	P02647	APOA1_HUMAN	Apolipoprotein A-I (Apo-AI) (ApoA-I) (Apolipoprotein A1) [Cleaved into: Proapolipoprotein A-I (ProapoA-I); Truncated apolipoprotein A-I (Apolipoprotein A-I(1-242))]	267	3D-structure;Amyloid;Amyloidosis;Atherosclerosis;Cholesterol metabolism;Direct protein sequencing;Disease variant;Glycation;Glycoprotein;HDL;Lipid metabolism;Lipid transport;Lipoprotein;Neuropathy;Oxidation;Palmitate;Phosphoprotein;Reference proteome;Repeat;Secreted;Signal;Steroid metabolism;Sterol metabolism;Transport	adrenal gland development [GO:0030325]; blood vessel endothelial cell migration [GO:0043534]; cholesterol biosynthetic process [GO:0006695]; cholesterol efflux [GO:0033344]; cholesterol homeostasis [GO:0042632]; cholesterol import [GO:0070508]; cholesterol metabolic process [GO:0008203]; cholesterol transport [GO:0030301]; endothelial cell proliferation [GO:0001935]; G protein-coupled receptor si…
LC-MS/MS	APOE	FALSE	Protein	TRUE	APOE	P02649	P02649	P02649	APOE_HUMAN	Apolipoprotein E (Apo-E)	317	3D-structure;Alzheimer disease;Amyloidosis;Cholesterol metabolism;Chylomicron;Direct protein sequencing;Disease variant;Endosome;Extracellular matrix;Glycation;Glycoprotein;HDL;Heparin-binding;Host-virus interaction;Hyperlipidemia;Lipid metabolism;Lipid transport;Lipid-binding;Neurodegeneration;Oxidation;Phosphoprotein;Reference proteome;Repeat;Secreted;Signal;Steroid metabolism;Sterol metabolism…	AMPA glutamate receptor clustering [GO:0097113]; amyloid precursor protein metabolic process [GO:0042982]; artery morphogenesis [GO:0048844]; cGMP-mediated signaling [GO:0019934]; cholesterol catabolic process [GO:0006707]; cholesterol efflux [GO:0033344]; cholesterol homeostasis [GO:0042632]; cholesterol metabolic process [GO:0008203]; chylomicron remnant clearance [GO:0034382]; cytoskeleton org…
LC-MS/MS	APOA2	FALSE	Protein	TRUE	APOA2	P02652	P02652	P02652	APOA2_HUMAN	Apolipoprotein A-II (Apo-AII) (ApoA-II) (Apolipoprotein A2) [Cleaved into: Proapolipoprotein A-II (ProapoA-II); Truncated apolipoprotein A-II (Apolipoprotein A-II(1-76))]	100	Cleavage on pair of basic residues;Direct protein sequencing;Disulfide bond;Glycoprotein;HDL;Host-virus interaction;Lipid transport;Oxidation;Phosphoprotein;Pyrrolidone carboxylic acid;Reference proteome;Secreted;Signal;Transport	animal organ regeneration [GO:0031100]; cholesterol efflux [GO:0033344]; cholesterol homeostasis [GO:0042632]; cholesterol metabolic process [GO:0008203]; cholesterol transport [GO:0030301]; diacylglycerol catabolic process [GO:0046340]; high-density lipoprotein particle assembly [GO:0034380]; high-density lipoprotein particle clearance [GO:0034384]; high-density lipoprotein particle remodeling […
LC-MS/MS	APOC1	FALSE	Protein	TRUE	APOC1	P02654	P02654	P02654	APOC1_HUMAN	Apolipoprotein C-I (Apo-CI) (ApoC-I) (Apolipoprotein C1) [Cleaved into: Truncated apolipoprotein C-I]	83	3D-structure;Direct protein sequencing;Lipid transport;Reference proteome;Secreted;Signal;Transport;VLDL	cholesterol efflux [GO:0033344]; cholesterol metabolic process [GO:0008203]; chylomicron remnant clearance [GO:0034382]; high-density lipoprotein particle remodeling [GO:0034375]; lipid metabolic process [GO:0006629]; lipoprotein metabolic process [GO:0042157]; negative regulation of cholesterol transport [GO:0032375]; negative regulation of fatty acid biosynthetic process [GO:0045717]; negative …
LC-MS/MS	APOC2	FALSE	Protein	TRUE	APOC2	P02655	P02655	P02655	APOC2_HUMAN	Apolipoprotein C-II (Apo-CII) (ApoC-II) (Apolipoprotein C2) [Cleaved into: Proapolipoprotein C-II (ProapoC-II)]	101	3D-structure;Chylomicron;Direct protein sequencing;Disease variant;Glycoprotein;HDL;Hyperlipidemia;LDL;Lipid degradation;Lipid metabolism;Lipid transport;Reference proteome;Secreted;Sialic acid;Signal;Transport;VLDL	cholesterol efflux [GO:0033344]; cholesterol homeostasis [GO:0042632]; chylomicron remnant clearance [GO:0034382]; chylomicron remodeling [GO:0034371]; high-density lipoprotein particle clearance [GO:0034384]; lipid catabolic process [GO:0016042]; negative regulation of cholesterol transport [GO:0032375]; negative regulation of lipid metabolic process [GO:0045833]; negative regulation of receptor…
LC-MS/MS	APOC3	FALSE	Protein	TRUE	APOC3	P02656	P02656	P02656	APOC3_HUMAN	Apolipoprotein C-III (Apo-CIII) (ApoC-III) (Apolipoprotein C3)	99	3D-structure;Chylomicron;Direct protein sequencing;Disease variant;Glycoprotein;Lipid degradation;Lipid metabolism;Lipid transport;Reference proteome;Secreted;Sialic acid;Signal;Transport;VLDL	cholesterol efflux [GO:0033344]; cholesterol homeostasis [GO:0042632]; chylomicron remnant clearance [GO:0034382]; G protein-coupled receptor signaling pathway [GO:0007186]; high-density lipoprotein particle remodeling [GO:0034375]; lipoprotein metabolic process [GO:0042157]; negative regulation of cholesterol import [GO:0060621]; negative regulation of fatty acid biosynthetic process [GO:0045717…
LC-MS/MS	FGA	TRUE	Protein	TRUE	FGA	P02671	P02671	P02671	FIBA_HUMAN	Fibrinogen alpha chain [Cleaved into: Fibrinopeptide A; Fibrinogen alpha chain]	866	3D-structure;Adaptive immunity;Alternative splicing;Amyloid;Amyloidosis;Blood coagulation;Calcium;Coiled coil;Direct protein sequencing;Disease variant;Disulfide bond;Glycoprotein;Hemostasis;Hydroxylation;Immunity;Innate immunity;Isopeptide bond;Metal-binding;Phosphoprotein;Reference proteome;Secreted;Signal	adaptive immune response [GO:0002250]; blood coagulation, common pathway [GO:0072377]; blood coagulation, fibrin clot formation [GO:0072378]; cell-matrix adhesion [GO:0007160]; fibrinolysis [GO:0042730]; induction of bacterial agglutination [GO:0043152]; innate immune response [GO:0045087]; negative regulation of endothelial cell apoptotic process [GO:2000352]; negative regulation of extrinsic ap…
LC-MS/MS	FGB	TRUE	Protein	TRUE	FGB	P02675	P02675	P02675	FIBB_HUMAN	Fibrinogen beta chain [Cleaved into: Fibrinopeptide B; Fibrinogen beta chain]	491	3D-structure;Adaptive immunity;Blood coagulation;Coiled coil;Direct protein sequencing;Disease variant;Disulfide bond;Glycoprotein;Hemostasis;Immunity;Innate immunity;Pyrrolidone carboxylic acid;Reference proteome;Secreted;Signal	adaptive immune response [GO:0002250]; blood coagulation, fibrin clot formation [GO:0072378]; cell-matrix adhesion [GO:0007160]; cellular response to interleukin-1 [GO:0071347]; cellular response to leptin stimulus [GO:0044320]; fibrinolysis [GO:0042730]; induction of bacterial agglutination [GO:0043152]; innate immune response [GO:0045087]; negative regulation of endothelial cell apoptotic proce…
LC-MS/MS	FGG	TRUE	Protein	TRUE	FGG	P02679	P02679	P02679	FIBG_HUMAN	Fibrinogen gamma chain	453	3D-structure;Alternative splicing;Blood coagulation;Calcium;Coiled coil;Direct protein sequencing;Disease variant;Disulfide bond;Glycoprotein;Hemostasis;Isopeptide bond;Metal-binding;Phosphoprotein;Reference proteome;Secreted;Signal;Sulfation	blood coagulation, fibrin clot formation [GO:0072378]; cell-matrix adhesion [GO:0007160]; cellular response to interleukin-1 [GO:0071347]; cellular response to interleukin-6 [GO:0071354]; fibrinolysis [GO:0042730]; negative regulation of endothelial cell apoptotic process [GO:2000352]; negative regulation of extrinsic apoptotic signaling pathway via death domain receptors [GO:1902042]; plasminoge…
LC-MS/MS	CRP	TRUE	Protein	TRUE	CRP	P02741	P02741	P02741	CRP_HUMAN	C-reactive protein [Cleaved into: C-reactive protein(1-205)]	224	3D-structure;Acute phase;Alternative splicing;Calcium;Direct protein sequencing;Disulfide bond;Metal-binding;Pyrrolidone carboxylic acid;Reference proteome;Secreted;Signal	acute-phase response [GO:0006953]; defense response to Gram-positive bacterium [GO:0050830]; inflammatory response [GO:0006954]; innate immune response [GO:0045087]; negative regulation of lipid storage [GO:0010888]; negative regulation of macrophage derived foam cell differentiation [GO:0010745]; negative regulation of mononuclear cell proliferation [GO:0032945]; opsonization [GO:0008228]; posit…
LC-MS/MS	APCS	TRUE	Protein	TRUE	APCS	P02743	P02743	P02743	SAMP_HUMAN	Serum amyloid P-component (SAP) (9.5S alpha-1-glycoprotein) [Cleaved into: Serum amyloid P-component(1-203)]	223	3D-structure;Amyloid;Calcium;Direct protein sequencing;Disulfide bond;Glycoprotein;Lectin;Metal-binding;Reference proteome;Secreted;Signal	acute-phase response [GO:0006953]; chaperone-mediated protein complex assembly [GO:0051131]; innate immune response [GO:0045087]; negative regulation by host of viral exo-alpha-sialidase activity [GO:0044869]; negative regulation by host of viral glycoprotein metabolic process [GO:0044871]; negative regulation of acute inflammatory response [GO:0002674]; negative regulation of exo-alpha-sialidase…
LC-MS/MS	C1QA	FALSE	Protein	TRUE	C1QA	P02745	P02745	P02745	C1QA_HUMAN	Complement C1q subcomponent subunit A	245	3D-structure;Collagen;Complement pathway;Direct protein sequencing;Disulfide bond;Glycoprotein;Host-virus interaction;Hydroxylation;Immunity;Innate immunity;Reference proteome;Repeat;Secreted;Signal	astrocyte activation [GO:0048143]; cell-cell signaling [GO:0007267]; complement activation [GO:0006956]; complement activation, classical pathway [GO:0006958]; complement-mediated synapse pruning [GO:0150062]; innate immune response [GO:0045087]; microglial cell activation [GO:0001774]; neuron remodeling [GO:0016322]; synapse organization [GO:0050808]; synapse pruning [GO:0098883]; vertebrate eye…
LC-MS/MS	C1QB	FALSE	Protein	TRUE	C1QB	P02746	P02746	P02746	C1QB_HUMAN	Complement C1q subcomponent subunit B	253	3D-structure;Collagen;Complement pathway;Direct protein sequencing;Disease variant;Disulfide bond;Glycoprotein;Hydroxylation;Immunity;Innate immunity;Pyrrolidone carboxylic acid;Reference proteome;Repeat;Secreted;Signal	complement activation [GO:0006956]; complement activation, classical pathway [GO:0006958]; innate immune response [GO:0045087]; synapse pruning [GO:0098883]
LC-MS/MS	C1QC	FALSE	Protein	TRUE	C1QC	P02747	P02747	P02747	C1QC_HUMAN	Complement C1q subcomponent subunit C	245	3D-structure;Collagen;Complement pathway;Direct protein sequencing;Disease variant;Disulfide bond;Glycoprotein;Hydroxylation;Immunity;Innate immunity;Reference proteome;Repeat;Secreted;Signal	complement activation, classical pathway [GO:0006958]; immune response [GO:0006955]; innate immune response [GO:0045087]; negative regulation of granulocyte differentiation [GO:0030853]; negative regulation of macrophage differentiation [GO:0045650]; synapse pruning [GO:0098883]
LC-MS/MS	C9	FALSE	Protein	TRUE	C9	P02748	P02748	P02748	CO9_HUMAN	Complement component C9 [Cleaved into: Complement component C9a; Complement component C9b]	559	3D-structure;Age-related macular degeneration;Complement alternate pathway;Complement pathway;Cytolysis;Direct protein sequencing;Disease variant;Disulfide bond;EGF-like domain;Glycoprotein;Immunity;Innate immunity;Membrane;Membrane attack complex;Phosphoprotein;Reference proteome;Secreted;Signal;Target cell membrane;Target membrane;Transmembrane;Transmembrane beta strand	cell killing [GO:0001906]; complement activation [GO:0006956]; complement activation, alternative pathway [GO:0006957]; complement activation, classical pathway [GO:0006958]; killing of cells of another organism [GO:0031640]; positive regulation of immune response [GO:0050778]; protein homooligomerization [GO:0051260]
LC-MS/MS	APOH	FALSE	Protein	TRUE	APOH	P02749	P02749	P02749	APOH_HUMAN	Beta-2-glycoprotein 1 (APC inhibitor) (Activated protein C-binding protein) (Anticardiolipin cofactor) (Apolipoprotein H) (Apo-H) (Beta-2-glycoprotein I) (B2GPI) (Beta(2)GPI)	345	3D-structure;Direct protein sequencing;Disulfide bond;Glycoprotein;Heparin-binding;Reference proteome;Repeat;Secreted;Signal;Sushi	blood coagulation, intrinsic pathway [GO:0007597]; negative regulation of angiogenesis [GO:0016525]; negative regulation of blood coagulation [GO:0030195]; negative regulation of endothelial cell migration [GO:0010596]; negative regulation of endothelial cell proliferation [GO:0001937]; negative regulation of fibrinolysis [GO:0051918]; negative regulation of myeloid cell apoptotic process [GO:003…
LC-MS/MS	LRG1	FALSE	Protein	TRUE	LRG1	P02750	P02750	P02750	A2GL_HUMAN	Leucine-rich alpha-2-glycoprotein (LRG)	347	3D-structure;Direct protein sequencing;Disulfide bond;Glycoprotein;Leucine-rich repeat;Reference proteome;Repeat;Secreted;Signal	brown fat cell differentiation [GO:0050873]; keratinocyte migration [GO:0051546]; leukocyte adhesion to vascular endothelial cell [GO:0061756]; positive regulation of angiogenesis [GO:0045766]; positive regulation of endothelial cell proliferation [GO:0001938]; positive regulation of epithelial cell proliferation involved in wound healing [GO:0060054]; positive regulation of epithelial to mesench…
LC-MS/MS	FN1	FALSE	Protein	TRUE	FN1	P02751	P02751	P02751	FINC_HUMAN	Fibronectin (FN) (Cold-insoluble globulin) (CIG) [Cleaved into: Anastellin; Ugl-Y1; Ugl-Y2; Ugl-Y3]	2477	3D-structure;Acute phase;Alternative splicing;Angiogenesis;Cell adhesion;Cell shape;Direct protein sequencing;Disease variant;Disulfide bond;Dwarfism;Extracellular matrix;Glycoprotein;Heparin-binding;Isopeptide bond;Oxidation;Phosphoprotein;Pyrrolidone carboxylic acid;Reference proteome;Repeat;Secreted;Signal;Sulfation	acute-phase response [GO:0006953]; angiogenesis [GO:0001525]; biological process involved in interaction with symbiont [GO:0051702]; calcium-independent cell-matrix adhesion [GO:0007161]; cell adhesion [GO:0007155]; cell-matrix adhesion [GO:0007160]; cell-substrate junction assembly [GO:0007044]; endodermal cell differentiation [GO:0035987]; heart development [GO:0007507]; integrin activation [GO…
LC-MS/MS	RBP4	FALSE	Protein	TRUE	RBP4	P02753	P02753	P02753	RET4_HUMAN	Retinol-binding protein 4 (Plasma retinol-binding protein) (PRBP) (RBP) [Cleaved into: Plasma retinol-binding protein(1-182); Plasma retinol-binding protein(1-181); Plasma retinol-binding protein(1-179); Plasma retinol-binding protein(1-176)]	201	3D-structure;Direct protein sequencing;Disease variant;Disulfide bond;Methylation;Microphthalmia;Reference proteome;Retinol-binding;Secreted;Sensory transduction;Signal;Transport;Vision;Vitamin A	cardiac muscle tissue development [GO:0048738]; embryonic organ morphogenesis [GO:0048562]; embryonic retina morphogenesis in camera-type eye [GO:0060059]; embryonic skeletal system development [GO:0048706]; eye development [GO:0001654]; female genitalia morphogenesis [GO:0048807]; gluconeogenesis [GO:0006094]; glucose homeostasis [GO:0042593]; heart development [GO:0007507]; heart trabecula form…
LC-MS/MS	AMBP	FALSE	Protein	TRUE	AMBP	P02760	P02760	P02760	AMBP_HUMAN	Protein AMBP (Protein HC) [Cleaved into: Alpha-1-microglobulin (EC 1.6.2.-) (Alpha-1 microglycoprotein) (Complex-forming glycoprotein heterogeneous in charge); Inter-alpha-trypsin inhibitor light chain (ITI-LC) (Bikunin) (EDC1) (HI-30) (Uronic-acid-rich protein); Trypstatin]	352	3D-structure;Cell membrane;Chromophore;Cleavage on pair of basic residues;Cytoplasm;Direct protein sequencing;Disulfide bond;Endoplasmic reticulum;Extracellular matrix;Glycoprotein;Host-virus interaction;Membrane;Mitochondrion;Mitochondrion inner membrane;Nucleus;Oxidoreductase;Protease inhibitor;Proteoglycan;Reference proteome;Repeat;Secreted;Serine protease inhibitor;Signal	cell adhesion [GO:0007155]; female pregnancy [GO:0007565]; heme catabolic process [GO:0042167]; negative regulation of immune response [GO:0050777]; negative regulation of JNK cascade [GO:0046329]
LC-MS/MS	ORM1	FALSE	Protein	TRUE	ORM1	P02763	P02763	P02763	A1AG1_HUMAN	Alpha-1-acid glycoprotein 1 (AGP 1) (Orosomucoid-1) (OMD 1)	201	3D-structure;Acute phase;Direct protein sequencing;Disulfide bond;Glycoprotein;Pyrrolidone carboxylic acid;Reference proteome;Secreted;Signal;Transport	acute-phase response [GO:0006953]; inflammatory response [GO:0006954]; negative regulation of interleukin-6 production [GO:0032715]; negative regulation of tumor necrosis factor production [GO:0032720]; positive regulation of interleukin-1 beta production [GO:0032731]; positive regulation of interleukin-1 production [GO:0032732]; positive regulation of tumor necrosis factor production [GO:0032760…
LC-MS/MS	AHSG	FALSE	Protein	TRUE	AHSG	P02765	P02765	P02765	FETUA_HUMAN	Alpha-2-HS-glycoprotein (Alpha-2-Z-globulin) (Ba-alpha-2-glycoprotein) (Fetuin-A) [Cleaved into: Alpha-2-HS-glycoprotein chain A; Alpha-2-HS-glycoprotein chain B]	367	Direct protein sequencing;Disease variant;Disulfide bond;Glycoprotein;Hypotrichosis;Intellectual disability;Mineral balance;Phosphoprotein;Reference proteome;Repeat;Secreted;Signal	acute-phase response [GO:0006953]; negative regulation of bone mineralization [GO:0030502]; negative regulation of insulin receptor signaling pathway [GO:0046627]; ossification [GO:0001503]; pinocytosis [GO:0006907]; positive regulation of phagocytosis [GO:0050766]; regulation of bone mineralization [GO:0030500]; regulation of inflammatory response [GO:0050727]; skeletal system development [GO:00…
LC-MS/MS	TTR	FALSE	Protein	TRUE	TTR	P02766	P02766	P02766	TTHY_HUMAN	Transthyretin (ATTR) (Prealbumin) (TBPA)	147	3D-structure;Amyloid;Amyloidosis;Cytoplasm;Direct protein sequencing;Disease variant;Gamma-carboxyglutamic acid;Glycoprotein;Hormone;Neuropathy;Phosphoprotein;Reference proteome;Secreted;Signal;Sulfation;Thyroid hormone;Transport	purine nucleobase metabolic process [GO:0006144]
LC-MS/MS	GC	FALSE	Protein	TRUE	GC	P02774	P02774	P02774	VTDB_HUMAN	Vitamin D-binding protein (DBP) (VDB) (Gc protein-derived macrophage activating factor) (Gc-MAF) (GcMAF) (Gc-globulin) (Group-specific component) (Gc) (Vitamin D-binding protein-macrophage activating factor) (DBP-maf)	474	3D-structure;Actin-binding;Alternative splicing;Direct protein sequencing;Disulfide bond;Glycoprotein;Reference proteome;Repeat;Secreted;Signal;Transport;Vitamin D	vitamin D metabolic process [GO:0042359]; vitamin transport [GO:0051180]
LC-MS/MS	PPBP	FALSE	Protein	TRUE	PPBP	P02775	P02775	P02775	CXCL7_HUMAN	Platelet basic protein (PBP) (C-X-C motif chemokine 7) (Leukocyte-derived growth factor) (LDGF) (Macrophage-derived growth factor) (MDGF) (Small-inducible cytokine B7) [Cleaved into: Connective tissue-activating peptide III (CTAP-III) (LA-PF4) (Low-affinity platelet factor IV); TC-2; Connective tissue-activating peptide III(1-81) (CTAP-III(1-81)); Beta-thromboglobulin (Beta-TG); Neutrophil-activa…	128	3D-structure;Antibiotic;Antimicrobial;Chemotaxis;Cleavage on pair of basic residues;Cytokine;Direct protein sequencing;Disulfide bond;Growth factor;Mitogen;Reference proteome;Secreted;Signal	antimicrobial humoral immune response mediated by antimicrobial peptide [GO:0061844]; cellular response to lipopolysaccharide [GO:0071222]; chemokine-mediated signaling pathway [GO:0070098]; defense response to bacterium [GO:0042742]; glucose transmembrane transport [GO:1904659]; inflammatory response [GO:0006954]; neutrophil chemotaxis [GO:0030593]; positive regulation of cell division [GO:00517…
LC-MS/MS	PF4	FALSE	Protein	TRUE	PF4	P02776	P02776	P02776	PLF4_HUMAN	Platelet factor 4 (PF-4) (C-X-C motif chemokine 4) (Iroplact) (Oncostatin-A) [Cleaved into: Platelet factor 4, short form (Endothelial cell growth inhibitor)]	101	3D-structure;Chemotaxis;Cytokine;Direct protein sequencing;Disulfide bond;Heparin-binding;Phosphoprotein;Reference proteome;Secreted;Signal	adenylate cyclase-activating G protein-coupled receptor signaling pathway [GO:0007189]; antimicrobial humoral immune response mediated by antimicrobial peptide [GO:0061844]; cellular response to lipopolysaccharide [GO:0071222]; chemokine-mediated signaling pathway [GO:0070098]; cytokine-mediated signaling pathway [GO:0019221]; defense response to protozoan [GO:0042832]; inflammatory response [GO:…
LC-MS/MS	PF4	FALSE	Protein	FALSE	PF4V1	P10720	P10720	P10720	PF4V_HUMAN	Platelet factor 4 variant (C-X-C motif chemokine 4 variant) (CXCL4L1) (PF4alt) (PF4var1) [Cleaved into: Platelet factor 4 variant(4-74); Platelet factor 4 variant(5-74); Platelet factor 4 variant(6-74)]	104	3D-structure;Cytokine;Direct protein sequencing;Disulfide bond;Glycoprotein;Heparin-binding;Proteoglycan;Reference proteome;Secreted;Signal	antimicrobial humoral immune response mediated by antimicrobial peptide [GO:0061844]; cellular response to lipopolysaccharide [GO:0071222]; chemokine-mediated signaling pathway [GO:0070098]; inflammatory response [GO:0006954]; neutrophil chemotaxis [GO:0030593]
LC-MS/MS	TF	FALSE	Protein	TRUE	TF	P02787	P02787	P02787	TRFE_HUMAN	Serotransferrin (Transferrin) (Beta-1 metal-binding globulin) (Siderophilin)	698	3D-structure;Direct protein sequencing;Disease variant;Disulfide bond;Glycoprotein;Ion transport;Iron;Iron transport;Metal-binding;Methylation;Phosphoprotein;Reference proteome;Repeat;Secreted;Signal;Transport	actin filament organization [GO:0007015]; antibacterial humoral response [GO:0019731]; cellular response to iron ion [GO:0071281]; ERK1 and ERK2 cascade [GO:0070371]; intracellular iron ion homeostasis [GO:0006879]; iron ion transmembrane transport [GO:0034755]; iron ion transport [GO:0006826]; osteoclast differentiation [GO:0030316]; positive regulation of bone resorption [GO:0045780]; positive …
LC-MS/MS	LTF	FALSE	Protein	TRUE	LTF	P02788	P02788	P02788	TRFL_HUMAN	Lactotransferrin (Lactoferrin) (EC 3.4.21.-) (Growth-inhibiting protein 12) (Talalactoferrin) [Cleaved into: Lactoferricin-H (Lfcin-H); Kaliocin-1; Lactoferroxin-A; Lactoferroxin-B; Lactoferroxin-C]	710	3D-structure;Alternative promoter usage;Antibiotic;Antimicrobial;Cytoplasm;Direct protein sequencing;Disulfide bond;DNA-binding;Glycoprotein;Heparin-binding;Hydrolase;Immunity;Ion transport;Iron;Iron transport;Isopeptide bond;Metal-binding;Nucleus;Osteogenesis;Protease;Reference proteome;Repeat;Secreted;Serine protease;Signal;Transcription;Transcription regulation;Transport;Ubl conjugation	antibacterial humoral response [GO:0019731]; antifungal humoral response [GO:0019732]; antimicrobial humoral immune response mediated by antimicrobial peptide [GO:0061844]; bone morphogenesis [GO:0060349]; defense response to Gram-negative bacterium [GO:0050829]; humoral immune response [GO:0006959]; innate immune response in mucosa [GO:0002227]; iron ion transmembrane transport [GO:0034755]; iro…
LC-MS/MS	HPX	FALSE	Protein	TRUE	HPX	P02790	P02790	P02790	HEMO_HUMAN	Hemopexin (Beta-1B-glycoprotein)	462	Direct protein sequencing;Disulfide bond;Glycoprotein;Heme;Host-virus interaction;Iron;Metal-binding;Reference proteome;Repeat;Secreted;Signal;Transport	heme metabolic process [GO:0042168]; heme transport [GO:0015886]; hemoglobin metabolic process [GO:0020027]; intracellular iron ion homeostasis [GO:0006879]; positive regulation of humoral immune response mediated by circulating immunoglobulin [GO:0002925]; positive regulation of immunoglobulin production [GO:0002639]; positive regulation of type II interferon-mediated signaling pathway [GO:00603…
LC-MS/MS	F11	FALSE	Protein	TRUE	F11	P03951	P03951	P03951	FA11_HUMAN	Coagulation factor XI (FXI) (EC 3.4.21.27) (Plasma thromboplastin antecedent) (PTA) [Cleaved into: Coagulation factor XIa heavy chain; Coagulation factor XIa light chain]	625	3D-structure;Alternative splicing;Blood coagulation;Direct protein sequencing;Disease variant;Disulfide bond;Glycoprotein;Hemostasis;Heparin-binding;Hydrolase;Protease;Reference proteome;Repeat;Secreted;Serine protease;Signal	blood coagulation [GO:0007596]; plasminogen activation [GO:0031639]; positive regulation of fibrinolysis [GO:0051919]
LC-MS/MS	GZMH	FALSE	Protein	TRUE	KLKB1	P03952	P03952	P03952	KLKB1_HUMAN	Plasma kallikrein (EC 3.4.21.34) (Fletcher factor) (Kininogenin) (Plasma prekallikrein) (PKK) [Cleaved into: Plasma kallikrein heavy chain; Plasma kallikrein light chain]	638	3D-structure;Blood coagulation;Direct protein sequencing;Disease variant;Disulfide bond;Fibrinolysis;Glycoprotein;Hemostasis;Hydrolase;Inflammatory response;Protease;Reference proteome;Repeat;Secreted;Serine protease;Signal;Zymogen	blood coagulation [GO:0007596]; Factor XII activation [GO:0002542]; fibrinolysis [GO:0042730]; plasminogen activation [GO:0031639]; positive regulation of fibrinolysis [GO:0051919]; proteolysis [GO:0006508]; zymogen activation [GO:0031638]
LC-MS/MS	GZMH	FALSE	Protein	FALSE	GZMH	P20718	P20718	P20718	GRAH_HUMAN	Granzyme H (EC 3.4.21.-) (CCP-X) (Cathepsin G-like 2) (CTSGL2) (Cytotoxic T-lymphocyte proteinase) (Cytotoxic serine protease C) (CSP-C)	246	3D-structure;Alternative splicing;Cytolysis;Disulfide bond;Glycoprotein;Hydrolase;Lysosome;Protease;Reference proteome;Serine protease;Signal;Zymogen	apoptotic process [GO:0006915]; killing of cells of another organism [GO:0031640]; proteolysis [GO:0006508]
LC-MS/MS	C4BPA	FALSE	Protein	TRUE	C4BPA	P04003	P04003	P04003	C4BPA_HUMAN	C4b-binding protein alpha chain (C4bp) (Proline-rich protein) (PRP)	597	3D-structure;Complement pathway;Direct protein sequencing;Disulfide bond;Glycoprotein;Immunity;Innate immunity;Reference proteome;Repeat;Secreted;Signal;Sushi	complement activation, classical pathway [GO:0006958]; innate immune response [GO:0045087]; negative regulation of complement activation, classical pathway [GO:0045959]; positive regulation of protein catabolic process [GO:0045732]; regulation of opsonization [GO:1903027]; response to symbiotic bacterium [GO:0009609]; T cell mediated immunity [GO:0002456]
LC-MS/MS	VTN	FALSE	Protein	TRUE	VTN	P04004	P04004	P04004	VTNC_HUMAN	Vitronectin (VN) (S-protein) (Serum-spreading factor) (V75) [Cleaved into: Vitronectin V65 subunit; Vitronectin V10 subunit; Somatomedin-B]	478	3D-structure;Cell adhesion;Direct protein sequencing;Disulfide bond;Glycoprotein;Heparin-binding;Phosphoprotein;Reference proteome;Repeat;Secreted;Signal;Sulfation	cell adhesion [GO:0007155]; cell adhesion mediated by integrin [GO:0033627]; cell migration [GO:0016477]; cell-matrix adhesion [GO:0007160]; endodermal cell differentiation [GO:0035987]; extracellular matrix organization [GO:0030198]; immune response [GO:0006955]; liver regeneration [GO:0097421]; negative regulation of blood coagulation [GO:0030195]; negative regulation of endopeptidase activity …
LC-MS/MS	CAT	FALSE	Protein	TRUE	CAT	P04040	P04040	P04040	CATA_HUMAN	Catalase (EC 1.11.1.6)	527	3D-structure;Acetylation;Direct protein sequencing;Heme;Hydrogen peroxide;Iron;Metal-binding;Mitogen;NADP;Oxidoreductase;Peroxidase;Peroxisome;Phosphoprotein;Reference proteome	aerobic respiration [GO:0009060]; cellular detoxification of hydrogen peroxide [GO:0061692]; cellular response to growth factor stimulus [GO:0071363]; cholesterol metabolic process [GO:0008203]; hemoglobin metabolic process [GO:0020027]; hydrogen peroxide catabolic process [GO:0042744]; negative regulation of apoptotic process [GO:0043066]; osteoblast differentiation [GO:0001649]; positive regula…
LC-MS/MS	PROC	FALSE	Protein	TRUE	PROC	P04070	P04070	P04070	PROC_HUMAN	Vitamin K-dependent protein C (EC 3.4.21.69) (Anticoagulant protein C) (Autoprothrombin IIA) (Blood coagulation factor XIV) [Cleaved into: Vitamin K-dependent protein C light chain; Vitamin K-dependent protein C heavy chain; Activation peptide]	461	3D-structure;Alternative splicing;Blood coagulation;Calcium;Cleavage on pair of basic residues;Direct protein sequencing;Disease variant;Disulfide bond;EGF-like domain;Endoplasmic reticulum;Gamma-carboxyglutamic acid;Glycoprotein;Golgi apparatus;Hemostasis;Hydrolase;Hydroxylation;Phosphoprotein;Protease;Reference proteome;Repeat;Secreted;Serine protease;Signal;Thrombophilia;Zymogen	blood coagulation [GO:0007596]; negative regulation of apoptotic process [GO:0043066]; negative regulation of blood coagulation [GO:0030195]; negative regulation of coagulation [GO:0050819]; negative regulation of inflammatory response [GO:0050728]; positive regulation of establishment of endothelial barrier [GO:1903142]; proteolysis [GO:0006508]
LC-MS/MS	APOB	FALSE	Protein	TRUE	APOB	P04114	P04114	P04114	APOB_HUMAN	Apolipoprotein B-100 (Apo B-100) [Cleaved into: Apolipoprotein B-48 (Apo B-48)]	4563	Acetylation;Atherosclerosis;Cholesterol metabolism;Chylomicron;Cytoplasm;Direct protein sequencing;Disease variant;Disulfide bond;Glycoprotein;Heparin-binding;LDL;Lipid droplet;Lipid metabolism;Lipid transport;Lipoprotein;Palmitate;Phosphoprotein;Reference proteome;RNA editing;Secreted;Signal;Steroid metabolism;Sterol metabolism;Transport;VLDL	artery morphogenesis [GO:0048844]; cholesterol efflux [GO:0033344]; cholesterol homeostasis [GO:0042632]; cholesterol metabolic process [GO:0008203]; cholesterol transport [GO:0030301]; establishment of localization in cell [GO:0051649]; fertilization [GO:0009566]; flagellated sperm motility [GO:0030317]; in utero embryonic development [GO:0001701]; lipoprotein biosynthetic process [GO:0042158]; …
LC-MS/MS	LCAT	FALSE	Protein	TRUE	LCAT	P04180	P04180	P04180	LCAT_HUMAN	Phosphatidylcholine-sterol acyltransferase (EC 2.3.1.43) (1-alkyl-2-acetylglycerophosphocholine esterase) (EC 3.1.1.47) (Lecithin-cholesterol acyltransferase) (Phospholipid-cholesterol acyltransferase) (Platelet-activating factor acetylhydrolase) (PAF acetylhydrolase)	440	3D-structure;Acyltransferase;Cholesterol metabolism;Corneal dystrophy;Direct protein sequencing;Disease variant;Disulfide bond;Glycoprotein;Hydrolase;Lipid metabolism;Reference proteome;Secreted;Signal;Steroid metabolism;Sterol metabolism;Transferase	cholesterol homeostasis [GO:0042632]; cholesterol metabolic process [GO:0008203]; cholesterol transport [GO:0030301]; high-density lipoprotein particle remodeling [GO:0034375]; lipid metabolic process [GO:0006629]; lipoprotein biosynthetic process [GO:0042158]; phosphatidylcholine biosynthetic process [GO:0006656]; phosphatidylcholine metabolic process [GO:0046470]; phospholipid metabolic process…
LC-MS/MS	HRG	FALSE	Protein	TRUE	HRG	P04196	P04196	P04196	HRG_HUMAN	Histidine-rich glycoprotein (Histidine-proline-rich glycoprotein) (HPRG)	525	Angiogenesis;Blood coagulation;Chemotaxis;Cleavage on pair of basic residues;Copper;Direct protein sequencing;Disease variant;Disulfide bond;Fibrinolysis;Glycoprotein;Hemostasis;Heparin-binding;Metal-binding;Reference proteome;Repeat;Secreted;Signal;Thrombophilia;Zinc	angiogenesis [GO:0001525]; antimicrobial humoral immune response mediated by antimicrobial peptide [GO:0061844]; chemotaxis [GO:0006935]; cytolysis by host of symbiont cells [GO:0051838]; defense response to fungus [GO:0050832]; fibrinolysis [GO:0042730]; heme transport [GO:0015886]; negative regulation of angiogenesis [GO:0016525]; negative regulation of blood vessel endothelial cell migration […
LC-MS/MS	IGLV7-43	FALSE	Ig peptide	TRUE	IGLV7-43	P04211	P04211	P04211	LV743_HUMAN	Immunoglobulin lambda variable 7-43 (Ig lambda chain V region 4A)	117	Adaptive immunity;Cell membrane;Disulfide bond;Immunity;Immunoglobulin;Immunoglobulin domain;Membrane;Reference proteome;Secreted;Signal	adaptive immune response [GO:0002250]; immune response [GO:0006955]
LC-MS/MS	A1BG	FALSE	Protein	TRUE	A1BG	P04217	P04217	P04217	A1BG_HUMAN	Alpha-1B-glycoprotein (Alpha-1-B glycoprotein)	495	Alternative splicing;Direct protein sequencing;Disulfide bond;Glycoprotein;Immunoglobulin domain;Reference proteome;Repeat;Secreted;Signal
LC-MS/MS	VWF	FALSE	Protein	TRUE	VWF	P04275	P04275	P04275	VWF_HUMAN	von Willebrand factor (vWF) [Cleaved into: von Willebrand antigen 2 (von Willebrand antigen II)]	2813	3D-structure;Alternative splicing;Blood coagulation;Cell adhesion;Cleavage on pair of basic residues;Direct protein sequencing;Disease variant;Disulfide bond;Extracellular matrix;Glycoprotein;Hemostasis;Reference proteome;Repeat;Secreted;Signal;von Willebrand disease	blood coagulation [GO:0007596]; cell adhesion [GO:0007155]; cell-substrate adhesion [GO:0031589]; hemostasis [GO:0007599]; platelet activation [GO:0030168]; positive regulation of intracellular signal transduction [GO:1902533]; response to wounding [GO:0009611]
LC-MS/MS	SHBG	FALSE	Protein	TRUE	SHBG	P04278	P04278	P04278	SHBG_HUMAN	Sex hormone-binding globulin (SHBG) (Sex steroid-binding protein) (SBP) (Testis-specific androgen-binding protein) (ABP) (Testosterone-estradiol-binding globulin) (TeBG) (Testosterone-estrogen-binding globulin)	402	3D-structure;Alternative splicing;Direct protein sequencing;Disulfide bond;Glycoprotein;Lipid-binding;Reference proteome;Repeat;Secreted;Signal;Steroid-binding
LC-MS/MS	GAPDH	FALSE	Protein	TRUE	GAPDH	P04406	P04406	P04406	G3P_HUMAN	Glyceraldehyde-3-phosphate dehydrogenase (GAPDH) (EC 1.2.1.12) (Peptidyl-cysteine S-nitrosylase GAPDH) (EC 2.6.99.-)	335	3D-structure;Acetylation;ADP-ribosylation;Alternative splicing;Apoptosis;Cytoplasm;Cytoskeleton;Direct protein sequencing;Glycolysis;Glycoprotein;Immunity;Innate immunity;Isopeptide bond;Membrane;Methylation;NAD;Nucleus;Oxidation;Oxidoreductase;Phosphoprotein;Reference proteome;S-nitrosylation;Transferase;Translation regulation;Ubl conjugation	antimicrobial humoral immune response mediated by antimicrobial peptide [GO:0061844]; cellular response to type II interferon [GO:0071346]; defense response to fungus [GO:0050832]; glucose metabolic process [GO:0006006]; glycolytic process [GO:0006096]; killing by host of symbiont cells [GO:0051873]; killing of cells of another organism [GO:0031640]; microtubule cytoskeleton organization [GO:0000…
LC-MS/MS	IGKV1-16	FALSE	Ig peptide	TRUE	IGKV1-16	P04430	P04430	P04430	KV116_HUMAN	Immunoglobulin kappa variable 1-16 (Ig kappa chain V-I region BAN)	117	Adaptive immunity;Cell membrane;Direct protein sequencing;Disulfide bond;Immunity;Immunoglobulin;Immunoglobulin domain;Membrane;Reference proteome;Secreted;Signal	adaptive immune response [GO:0002250]; immune response [GO:0006955]
LC-MS/MS	IGKV1[D]-39	FALSE	Ig peptide	TRUE	IGKV1D-39	P04432	P04432	P04432	KVD39_HUMAN	Immunoglobulin kappa variable 1D-39 (Ig kappa chain V-I region Daudi)	117	Adaptive immunity;Cell membrane;Disulfide bond;Immunity;Immunoglobulin;Immunoglobulin domain;Membrane;Reference proteome;Secreted;Signal	adaptive immune response [GO:0002250]; immune response [GO:0006955]
LC-MS/MS	IGKV1[D]-39	FALSE	Ig peptide	FALSE	IGKV1-39	P01597	P01597	P01597	KV139_HUMAN	Immunoglobulin kappa variable 1-39 (Ig kappa chain V-I region DEE) (Ig kappa chain V-I region Hau) (Ig kappa chain V-I region Mev) (Ig kappa chain V-I region OU) (Ig kappa chain V-I region Walker)	117	3D-structure;Adaptive immunity;Cell membrane;Direct protein sequencing;Disulfide bond;Immunity;Immunoglobulin;Immunoglobulin domain;Membrane;Reference proteome;Secreted;Signal	adaptive immune response [GO:0002250]; immune response [GO:0006955]
LC-MS/MS	IGKV3[D]-11	FALSE	Ig peptide	TRUE	IGKV3-11	P04433	P04433	P04433	KV311_HUMAN	Immunoglobulin kappa variable 3-11 (Ig kappa chain V-III region VG)	115	3D-structure;Adaptive immunity;Cell membrane;Disulfide bond;Immunity;Immunoglobulin;Immunoglobulin domain;Membrane;Reference proteome;Secreted;Signal	adaptive immune response [GO:0002250]; immune response [GO:0006955]
LC-MS/MS	IGKV3[D]-11	FALSE	Ig peptide	FALSE	IGKV3D-11	A0A0A0MRZ8	A0A0A0MRZ8	A0A0A0MRZ8	KVD11_HUMAN	Immunoglobulin kappa variable 3D-11	115	Adaptive immunity;Cell membrane;Disulfide bond;Immunity;Immunoglobulin;Immunoglobulin domain;Membrane;Reference proteome;Secreted;Signal	adaptive immune response [GO:0002250]; immune response [GO:0006955]
LC-MS/MS	APOD	FALSE	Protein	TRUE	APOD	P05090	P05090	P05090	APOD_HUMAN	Apolipoprotein D (Apo-D) (ApoD)	189	3D-structure;Direct protein sequencing;Disulfide bond;Glycoprotein;Lipid-binding;Pyrrolidone carboxylic acid;Reference proteome;Secreted;Signal;Transport	angiogenesis [GO:0001525]; brain development [GO:0007420]; glucose metabolic process [GO:0006006]; lipid metabolic process [GO:0006629]; negative regulation of cytokine production involved in inflammatory response [GO:1900016]; negative regulation of focal adhesion assembly [GO:0051895]; negative regulation of lipoprotein lipid oxidation [GO:0060588]; negative regulation of monocyte chemotactic p…
LC-MS/MS	ITGB3	FALSE	Protein	TRUE	ITGB3	P05106	P05106	P05106	ITB3_HUMAN	Integrin beta-3 (Platelet membrane glycoprotein IIIa) (GPIIIa) (CD antigen CD61)	788	3D-structure;Alternative splicing;Calcium;Cell adhesion;Cell junction;Cell membrane;Cell projection;Direct protein sequencing;Disease variant;Disulfide bond;EGF-like domain;Glycoprotein;Host cell receptor for virus entry;Host-virus interaction;Integrin;Magnesium;Membrane;Metal-binding;Phosphoprotein;Postsynaptic cell membrane;Receptor;Reference proteome;Repeat;Signal;Synapse;Transmembrane;Transme…	activation of protein kinase activity [GO:0032147]; angiogenesis involved in wound healing [GO:0060055]; apolipoprotein A-I-mediated signaling pathway [GO:0038027]; apoptotic cell clearance [GO:0043277]; blood coagulation [GO:0007596]; blood coagulation, fibrin clot formation [GO:0072378]; cell adhesion [GO:0007155]; cell adhesion mediated by integrin [GO:0033627]; cell-matrix adhesion [GO:000716…
LC-MS/MS	S100A8	FALSE	Protein	TRUE	S100A8	P05109	P05109	P05109	S10A8_HUMAN	Protein S100-A8 (Calgranulin-A) (Calprotectin L1L subunit) (Cystic fibrosis antigen) (CFAG) (Leukocyte L1 complex light chain) (Migration inhibitory factor-related protein 8) (MRP-8) (p8) (S100 calcium-binding protein A8) (Urinary stone protein band A)	93	3D-structure;Antimicrobial;Apoptosis;Autophagy;Calcium;Cell membrane;Chemotaxis;Cytoplasm;Cytoskeleton;Direct protein sequencing;Immunity;Inflammatory response;Innate immunity;Membrane;Metal-binding;Reference proteome;Repeat;S-nitrosylation;Secreted;Zinc	activation of cysteine-type endopeptidase activity involved in apoptotic process [GO:0006919]; apoptotic process [GO:0006915]; astrocyte development [GO:0014002]; autocrine signaling [GO:0035425]; autophagy [GO:0006914]; chronic inflammatory response [GO:0002544]; defense response to bacterium [GO:0042742]; defense response to fungus [GO:0050832]; inflammatory response [GO:0006954]; innate immune…
LC-MS/MS	SERPINA5	FALSE	Protein	TRUE	SERPINA5	P05154	P05154	P05154	IPSP_HUMAN	Plasma serine protease inhibitor (Acrosomal serine protease inhibitor) (Plasminogen activator inhibitor 3) (PAI-3) (PAI3) (Protein C inhibitor) (PCI) (Serpin A5)	406	3D-structure;Direct protein sequencing;Fertilization;Glycoprotein;Heparin-binding;Lipid transport;Protease inhibitor;Reference proteome;Secreted;Serine protease inhibitor;Signal;Transport	fusion of sperm to egg plasma membrane involved in single fertilization [GO:0007342]; lipid transport [GO:0006869]; negative regulation of hydrolase activity [GO:0051346]; spermatogenesis [GO:0007283]
LC-MS/MS	SERPING1	FALSE	Protein	TRUE	SERPING1	P05155	P05155	P05155	IC1_HUMAN	Plasma protease C1 inhibitor (C1 Inh) (C1Inh) (C1 esterase inhibitor) (C1-inhibiting factor) (Serpin G1)	500	3D-structure;Alternative splicing;Blood coagulation;Complement pathway;Direct protein sequencing;Disease variant;Disulfide bond;Fibrinolysis;Glycoprotein;Hemostasis;Immunity;Innate immunity;Protease inhibitor;Reference proteome;Repeat;Secreted;Serine protease inhibitor;Signal	blood circulation [GO:0008015]; blood coagulation [GO:0007596]; complement activation, classical pathway [GO:0006958]; fibrinolysis [GO:0042730]; innate immune response [GO:0045087]; negative regulation of complement activation, lectin pathway [GO:0001869]
LC-MS/MS	CFI	FALSE	Protein	TRUE	CFI	P05156	P05156	P05156	CFAI_HUMAN	Complement factor I (EC 3.4.21.45) (C3B/C4B inactivator) [Cleaved into: Complement factor I heavy chain; Complement factor I light chain]	583	3D-structure;Age-related macular degeneration;Calcium;Cleavage on pair of basic residues;Complement pathway;Direct protein sequencing;Disease variant;Disulfide bond;Glycoprotein;Hemolytic uremic syndrome;Host-virus interaction;Hydrolase;Immunity;Innate immunity;Metal-binding;Protease;Reference proteome;Repeat;Secreted;Serine protease;Signal	complement activation, classical pathway [GO:0006958]; innate immune response [GO:0045087]; proteolysis [GO:0006508]
LC-MS/MS	F13B	FALSE	Protein	TRUE	F13B	P05160	P05160	P05160	F13B_HUMAN	Coagulation factor XIII B chain (Fibrin-stabilizing factor B subunit) (Protein-glutamine gamma-glutamyltransferase B chain) (Transglutaminase B chain)	661	Blood coagulation;Direct protein sequencing;Disease variant;Disulfide bond;Glycoprotein;Hemostasis;Reference proteome;Repeat;Secreted;Signal;Sushi	blood coagulation [GO:0007596]; blood coagulation, fibrin clot formation [GO:0072378]
LC-MS/MS	CLEC3B	FALSE	Protein	TRUE	CLEC3B	P05452	P05452	P05452	TETN_HUMAN	Tetranectin (TN) (C-type lectin domain family 3 member B) (Plasminogen kringle 4-binding protein)	202	3D-structure;Direct protein sequencing;Disease variant;Disulfide bond;Glycoprotein;Lectin;Reference proteome;Secreted;Signal	bone mineralization [GO:0030282]; cellular response to organic substance [GO:0071310]; cellular response to transforming growth factor beta stimulus [GO:0071560]; ossification [GO:0001503]; positive regulation of plasminogen activation [GO:0010756]
LC-MS/MS	SERPINA7	FALSE	Protein	TRUE	SERPINA7	P05543	P05543	P05543	THBG_HUMAN	Thyroxine-binding globulin (Serpin A7) (T4-binding globulin)	415	3D-structure;Direct protein sequencing;Glycoprotein;Reference proteome;Secreted;Signal	thyroid hormone transport [GO:0070327]
LC-MS/MS	SERPIND1	FALSE	Protein	TRUE	SERPIND1	P05546	P05546	P05546	HEP2_HUMAN	Heparin cofactor 2 (Heparin cofactor II) (HC-II) (Protease inhibitor leuserpin-2) (HLS2) (Serpin D1)	499	3D-structure;Blood coagulation;Chemotaxis;Direct protein sequencing;Disease variant;Glycoprotein;Hemostasis;Heparin-binding;Phosphoprotein;Protease inhibitor;Reference proteome;Repeat;Serine protease inhibitor;Signal;Sulfation;Thrombophilia	blood coagulation [GO:0007596]; chemotaxis [GO:0006935]
LC-MS/MS	BCHE	FALSE	Protein	TRUE	BCHE	P06276	P06276	P06276	CHLE_HUMAN	Cholinesterase (EC 3.1.1.8) (Acylcholine acylhydrolase) (Butyrylcholine esterase) (Choline esterase II) (Pseudocholinesterase)	602	3D-structure;Direct protein sequencing;Disease variant;Disulfide bond;Glycoprotein;Hydrolase;Phosphoprotein;Reference proteome;Secreted;Serine esterase;Sialic acid;Signal	acetylcholine catabolic process [GO:0006581]; choline metabolic process [GO:0019695]; cocaine metabolic process [GO:0050783]; learning [GO:0007612]; negative regulation of cell population proliferation [GO:0008285]; negative regulation of synaptic transmission [GO:0050805]; neuroblast differentiation [GO:0014016]; peptide hormone processing [GO:0016486]; response to alkaloid [GO:0043279]; respons…
LC-MS/MS	IGKV2-30	FALSE	Ig peptide	TRUE	IGKV2-30	P06310	P06310	P06310	KV230_HUMAN	Immunoglobulin kappa variable 2-30 (Ig kappa chain V-II region RPMI 6410)	120	Adaptive immunity;Cell membrane;Disulfide bond;Immunity;Immunoglobulin;Immunoglobulin domain;Membrane;Reference proteome;Secreted;Signal	adaptive immune response [GO:0002250]; immune response [GO:0006955]
LC-MS/MS	IGKV4-1	FALSE	Ig peptide	TRUE	IGKV4-1	P06312	P06312	P06312	KV401_HUMAN	Immunoglobulin kappa variable 4-1 (Ig kappa chain V-IV region B17) (Ig kappa chain V-IV region JI) (Ig kappa chain V-IV region Len) (Ig kappa chain V-IV region STH)	121	3D-structure;Adaptive immunity;Cell membrane;Direct protein sequencing;Disulfide bond;Immunity;Immunoglobulin;Immunoglobulin domain;Membrane;Reference proteome;Secreted;Signal	adaptive immune response [GO:0002250]; immune response [GO:0006955]
LC-MS/MS	IGHV4-[30-4,30-2,31,34,39,59,61]	FALSE	Ig peptide	TRUE	IGHV4-34	P06331	P06331	P06331	HV434_HUMAN	Immunoglobulin heavy variable 4-34 (Ig heavy chain V-II region ARH-77)	123	Adaptive immunity;Cell membrane;Direct protein sequencing;Disulfide bond;Glycoprotein;Immunity;Immunoglobulin;Immunoglobulin domain;Membrane;Reference proteome;Secreted;Signal	immune response [GO:0006955]; immunoglobulin mediated immune response [GO:0016064]
LC-MS/MS	IGHV4-[30-4,30-2,31,34,39,59,61]	FALSE	Ig peptide	FALSE	IGHV4-30-4	P0DP06	P0DP06	P0DP06	HVD34_HUMAN	Immunoglobulin heavy variable 4-30-4	118	Adaptive immunity;Cell membrane;Disulfide bond;Immunity;Immunoglobulin;Immunoglobulin domain;Membrane;Reference proteome;Secreted;Signal	immunoglobulin mediated immune response [GO:0016064]
LC-MS/MS	IGHV4-[30-4,30-2,31,34,39,59,61]	FALSE	Ig peptide	FALSE	IGHV4-61	A0A0C4DH41	A0A0C4DH41	A0A0C4DH41	HV461_HUMAN	Immunoglobulin heavy variable 4-61	118	3D-structure;Adaptive immunity;Cell membrane;Disulfide bond;Immunity;Immunoglobulin;Immunoglobulin domain;Membrane;Reference proteome;Secreted;Signal	immunoglobulin mediated immune response [GO:0016064]
LC-MS/MS	IGHV4-[30-4,30-2,31,34,39,59,61]	FALSE	Ig peptide	FALSE	IGHV4-59	P01825	P01825	P01825	HV459_HUMAN	Immunoglobulin heavy variable 4-59 (Ig heavy chain V-II region NEWM)	116	3D-structure;Adaptive immunity;Cell membrane;Direct protein sequencing;Disulfide bond;Immunity;Immunoglobulin;Immunoglobulin domain;Membrane;Pyrrolidone carboxylic acid;Reference proteome;Secreted;Signal	immune response [GO:0006955]; immunoglobulin mediated immune response [GO:0016064]
LC-MS/MS	IGHV4-[30-4,30-2,31,34,39,59,61]	FALSE	Ig peptide	FALSE	IGHV4-39	P01824	P01824	P01824	HV439_HUMAN	Immunoglobulin heavy variable 4-39 (Ig heavy chain V-II region WAH)	125	3D-structure;Adaptive immunity;Cell membrane;Direct protein sequencing;Disulfide bond;Immunity;Immunoglobulin;Immunoglobulin domain;Membrane;Reference proteome;Secreted;Signal	immune response [GO:0006955]; immunoglobulin mediated immune response [GO:0016064]
LC-MS/MS	IGHV4-[30-4,30-2,31,34,39,59,61]	FALSE	Ig peptide	FALSE	IGHV4-31	P0DP07	P0DP07	P0DP07	HV431_HUMAN	Immunoglobulin heavy variable 4-31	118	Adaptive immunity;Cell membrane;Disulfide bond;Immunity;Immunoglobulin;Immunoglobulin domain;Membrane;Reference proteome;Secreted;Signal	immunoglobulin mediated immune response [GO:0016064]
LC-MS/MS	IGHV4-[30-4,30-2,31,34,39,59,61]	FALSE	Ig peptide	FALSE	IGHV4-30-2	A0A087WSY4	A0A087WSY4	A0A087WSY4	HV432_HUMAN	Immunoglobulin heavy variable 4-30-2	118	Adaptive immunity;Cell membrane;Disulfide bond;Immunity;Immunoglobulin;Immunoglobulin domain;Membrane;Reference proteome;Secreted;Signal	immunoglobulin mediated immune response [GO:0016064]
LC-MS/MS	GSN	FALSE	Protein	TRUE	GSN	P06396	P06396	P06396	GELS_HUMAN	Gelsolin (AGEL) (Actin-depolymerizing factor) (ADF) (Brevin)	782	3D-structure;Acetylation;Actin capping;Actin-binding;Alternative initiation;Alternative splicing;Amyloid;Amyloidosis;Calcium;Cilium biogenesis/degradation;Corneal dystrophy;Cytoplasm;Cytoskeleton;Direct protein sequencing;Disease variant;Disulfide bond;Metal-binding;Phosphoprotein;Reference proteome;Repeat;Secreted;Signal	actin filament capping [GO:0051693]; actin filament depolymerization [GO:0030042]; actin filament organization [GO:0007015]; actin filament polymerization [GO:0030041]; actin filament severing [GO:0051014]; actin polymerization or depolymerization [GO:0008154]; amyloid fibril formation [GO:1990000]; barbed-end actin filament capping [GO:0051016]; cardiac muscle cell contraction [GO:0086003]; cell…
LC-MS/MS	C2	FALSE	Protein	TRUE	C2	P06681	P06681	P06681	CO2_HUMAN	Complement C2 (EC 3.4.21.43) (C3/C5 convertase) [Cleaved into: Complement C2b fragment; Complement C2a fragment]	752	3D-structure;Age-related macular degeneration;Alternative splicing;Complement pathway;Direct protein sequencing;Disease variant;Disulfide bond;Glycoprotein;Hydrolase;Immunity;Innate immunity;Metal-binding;Protease;Reference proteome;Repeat;Secreted;Serine protease;Signal;Sushi	complement activation [GO:0006956]; complement activation, classical pathway [GO:0006958]; innate immune response [GO:0045087]; positive regulation of apoptotic cell clearance [GO:2000427]; proteolysis [GO:0006508]; response to bacterium [GO:0009617]; response to lipopolysaccharide [GO:0032496]; response to nutrient [GO:0007584]; response to thyroid hormone [GO:0097066]
LC-MS/MS	S100A9	FALSE	Protein	TRUE	S100A9	P06702	P06702	P06702	S10A9_HUMAN	Protein S100-A9 (Calgranulin-B) (Calprotectin L1H subunit) (Leukocyte L1 complex heavy chain) (Migration inhibitory factor-related protein 14) (MRP-14) (p14) (S100 calcium-binding protein A9)	114	3D-structure;Antimicrobial;Antioxidant;Apoptosis;Autophagy;Calcium;Cell membrane;Chemotaxis;Cytoplasm;Cytoskeleton;Direct protein sequencing;Immunity;Inflammatory response;Innate immunity;Membrane;Metal-binding;Methylation;Phosphoprotein;Reference proteome;Repeat;S-nitrosylation;Secreted;Zinc	activation of cysteine-type endopeptidase activity involved in apoptotic process [GO:0006919]; antimicrobial humoral immune response mediated by antimicrobial peptide [GO:0061844]; apoptotic process [GO:0006915]; astrocyte development [GO:0014002]; autocrine signaling [GO:0035425]; autophagy [GO:0006914]; cell-cell signaling [GO:0007267]; chronic inflammatory response [GO:0002544]; defense respon…
LC-MS/MS	APOA4	FALSE	Protein	TRUE	APOA4	P06727	P06727	P06727	APOA4_HUMAN	Apolipoprotein A-IV (Apo-AIV) (ApoA-IV) (Apolipoprotein A4)	396	3D-structure;Chylomicron;HDL;Lipid transport;Phosphoprotein;Reference proteome;Repeat;Secreted;Signal;Transport	cholesterol efflux [GO:0033344]; cholesterol homeostasis [GO:0042632]; cholesterol metabolic process [GO:0008203]; chylomicron assembly [GO:0034378]; chylomicron remodeling [GO:0034371]; high-density lipoprotein particle remodeling [GO:0034375]; hydrogen peroxide catabolic process [GO:0042744]; innate immune response in mucosa [GO:0002227]; leukocyte cell-cell adhesion [GO:0007159]; lipid catabol…
LC-MS/MS	ENO[1-3]	FALSE	Protein	TRUE	ENO1	P06733	P06733	P06733	ENOA_HUMAN	Alpha-enolase (EC 4.2.1.11) (2-phospho-D-glycerate hydro-lyase) (C-myc promoter-binding protein) (Enolase 1) (MBP-1) (MPB-1) (Non-neural enolase) (NNE) (Phosphopyruvate hydratase) (Plasminogen-binding protein)	434	3D-structure;Acetylation;Alternative initiation;Cell membrane;Cytoplasm;Direct protein sequencing;DNA-binding;Glycolysis;Hydroxylation;Isopeptide bond;Lyase;Magnesium;Membrane;Metal-binding;Nucleus;Phosphoprotein;Plasminogen activation;Reference proteome;Repressor;Transcription;Transcription regulation;Ubl conjugation	canonical glycolysis [GO:0061621]; gluconeogenesis [GO:0006094]; glycolytic process [GO:0006096]; negative regulation of cell growth [GO:0030308]; negative regulation of DNA-templated transcription [GO:0045892]; negative regulation of hypoxia-induced intrinsic apoptotic signaling pathway [GO:1903298]; negative regulation of transcription by RNA polymerase II [GO:0000122]; positive regulation of A…
LC-MS/MS	ENO[1-3]	FALSE	Protein	FALSE	ENO3	P13929	P13929	P13929	ENOB_HUMAN	Beta-enolase (EC 4.2.1.11) (2-phospho-D-glycerate hydro-lyase) (Enolase 3) (Muscle-specific enolase) (MSE) (Skeletal muscle enolase)	434	3D-structure;Acetylation;Alternative splicing;Cytoplasm;Disease variant;Glycogen storage disease;Glycolysis;Lyase;Magnesium;Metal-binding;Phosphoprotein;Reference proteome	canonical glycolysis [GO:0061621]; gluconeogenesis [GO:0006094]; glycolytic process [GO:0006096]
LC-MS/MS	ENO[1-3]	FALSE	Protein	FALSE	ENO2	P09104	P09104	P09104	ENOG_HUMAN	Gamma-enolase (EC 4.2.1.11) (2-phospho-D-glycerate hydro-lyase) (Enolase 2) (Neural enolase) (Neuron-specific enolase) (NSE)	434	3D-structure;Acetylation;Alternative splicing;Cell membrane;Cytoplasm;Direct protein sequencing;Glycolysis;Hydroxylation;Isopeptide bond;Lyase;Magnesium;Membrane;Metal-binding;Phosphoprotein;Reference proteome;Ubl conjugation	canonical glycolysis [GO:0061621]; gluconeogenesis [GO:0006094]; glycolytic process [GO:0006096]
LC-MS/MS	PROS1	FALSE	Protein	TRUE	PROS1	P07225	P07225	P07225	PROS_HUMAN	Vitamin K-dependent protein S	676	3D-structure;Blood coagulation;Calcium;Cleavage on pair of basic residues;Disease variant;Disulfide bond;EGF-like domain;Fibrinolysis;Gamma-carboxyglutamic acid;Glycoprotein;Hemostasis;Hydroxylation;Reference proteome;Repeat;Secreted;Signal;Thrombophilia;Zymogen	blood coagulation [GO:0007596]; fibrinolysis [GO:0042730]
LC-MS/MS	C8A	FALSE	Protein	TRUE	C8A	P07357	P07357	P07357	CO8A_HUMAN	Complement component C8 alpha chain (Complement component 8 subunit alpha)	584	3D-structure;Cell membrane;Cleavage on pair of basic residues;Complement alternate pathway;Complement pathway;Cytolysis;Direct protein sequencing;Disulfide bond;EGF-like domain;Glycoprotein;Immunity;Innate immunity;Membrane;Membrane attack complex;Reference proteome;Repeat;Secreted;Signal;Transmembrane;Transmembrane beta strand	complement activation [GO:0006956]; complement activation, alternative pathway [GO:0006957]; complement activation, classical pathway [GO:0006958]; immune response [GO:0006955]; killing of cells of another organism [GO:0031640]; positive regulation of immune response [GO:0050778]
LC-MS/MS	C8B	FALSE	Protein	TRUE	C8B	P07358	P07358	P07358	CO8B_HUMAN	Complement component C8 beta chain (Complement component 8 subunit beta)	591	3D-structure;Complement alternate pathway;Complement pathway;Cytolysis;Direct protein sequencing;Disulfide bond;EGF-like domain;Glycoprotein;Immunity;Innate immunity;Membrane attack complex;Phosphoprotein;Reference proteome;Repeat;Secreted;Signal	complement activation [GO:0006956]; complement activation, alternative pathway [GO:0006957]; complement activation, classical pathway [GO:0006958]; immune response [GO:0006955]; killing of cells of another organism [GO:0031640]; positive regulation of immune response [GO:0050778]
LC-MS/MS	C8G	FALSE	Protein	TRUE	C8G	P07360	P07360	P07360	CO8G_HUMAN	Complement component C8 gamma chain	202	3D-structure;Complement alternate pathway;Complement pathway;Cytolysis;Direct protein sequencing;Disulfide bond;Immunity;Innate immunity;Membrane attack complex;Pyrrolidone carboxylic acid;Reference proteome;Retinol-binding;Secreted;Signal	complement activation, alternative pathway [GO:0006957]; complement activation, classical pathway [GO:0006958]; killing of cells of another organism [GO:0031640]; positive regulation of immune response [GO:0050778]
LC-MS/MS	TUBB[2A-B;3;4A-B;()]	FALSE	Protein	TRUE	TUBB	P07437	P07437	P07437	TBB5_HUMAN	Tubulin beta chain (Tubulin beta-5 chain)	444	3D-structure;Acetylation;Cytoplasm;Cytoskeleton;Direct protein sequencing;Disease variant;GTP-binding;Isopeptide bond;Magnesium;Metal-binding;Methylation;Microtubule;Nucleotide-binding;Phosphoprotein;Reference proteome;Ubl conjugation	cell division [GO:0051301]; cytoskeleton-dependent intracellular transport [GO:0030705]; microtubule cytoskeleton organization [GO:0000226]; microtubule-based process [GO:0007017]; mitotic cell cycle [GO:0000278]; natural killer cell mediated cytotoxicity [GO:0042267]; odontoblast differentiation [GO:0071895]; regulation of synapse organization [GO:0050807]; spindle assembly [GO:0051225]
LC-MS/MS	TUBB[2A-B;3;4A-B;()]	FALSE	Protein	FALSE	TUBB2B	Q9BVA1	Q9BVA1	Q9BVA1	TBB2B_HUMAN	Tubulin beta-2B chain	445	3D-structure;Acetylation;Cytoplasm;Cytoskeleton;Direct protein sequencing;Disease variant;GTP-binding;Intellectual disability;Isopeptide bond;Magnesium;Metal-binding;Methylation;Microtubule;Neurogenesis;Nucleotide-binding;Phosphoprotein;Reference proteome;Ubl conjugation	cerebral cortex development [GO:0021987]; embryonic brain development [GO:1990403]; microtubule cytoskeleton organization [GO:0000226]; microtubule-based process [GO:0007017]; mitotic cell cycle [GO:0000278]; modulation of chemical synaptic transmission [GO:0050804]; neuron migration [GO:0001764]; positive regulation of axon guidance [GO:1902669]
LC-MS/MS	TUBB[2A-B;3;4A-B;()]	FALSE	Protein	FALSE	TUBB2A	Q13885	Q13885	Q13885	TBB2A_HUMAN	Tubulin beta-2A chain (Tubulin beta class IIa)	445	3D-structure;Acetylation;Cytoplasm;Cytoskeleton;Direct protein sequencing;Disease variant;GTP-binding;Isopeptide bond;Magnesium;Metal-binding;Methylation;Microtubule;Nucleotide-binding;Phosphoprotein;Reference proteome;Ubl conjugation	cerebral cortex development [GO:0021987]; microtubule cytoskeleton organization [GO:0000226]; mitotic cell cycle [GO:0000278]
LC-MS/MS	TUBB[2A-B;3;4A-B;()]	FALSE	Protein	FALSE	TUBB4B	P68371	P68371	P68371	TBB4B_HUMAN	Tubulin beta-4B chain (Tubulin beta-2 chain) (Tubulin beta-2C chain)	445	3D-structure;Acetylation;Cytoplasm;Cytoskeleton;Deafness;Disease variant;GTP-binding;Isopeptide bond;Leber congenital amaurosis;Magnesium;Metal-binding;Microtubule;Nucleotide-binding;Phosphoprotein;Reference proteome	microtubule cytoskeleton organization [GO:0000226]; mitotic cell cycle [GO:0000278]; natural killer cell mediated cytotoxicity [GO:0042267]
LC-MS/MS	TUBB[2A-B;3;4A-B;()]	FALSE	Protein	FALSE	TUBB4A	P04350	P04350	P04350	TBB4A_HUMAN	Tubulin beta-4A chain (Tubulin 5 beta) (Tubulin beta-4 chain)	444	Cytoplasm;Cytoskeleton;Direct protein sequencing;Disease variant;Dystonia;GTP-binding;Isopeptide bond;Leukodystrophy;Magnesium;Metal-binding;Microtubule;Nucleotide-binding;Phosphoprotein;Reference proteome	microtubule cytoskeleton organization [GO:0000226]; mitotic cell cycle [GO:0000278]; negative regulation of microtubule polymerization [GO:0031115]
LC-MS/MS	TUBB[2A-B;3;4A-B;()]	FALSE	Protein	FALSE	TUBB3	Q13509	Q13509	Q13509	TBB3_HUMAN	Tubulin beta-3 chain (Tubulin beta-4 chain) (Tubulin beta-III)	450	3D-structure;Alternative splicing;Cell projection;Cytoplasm;Cytoskeleton;Direct protein sequencing;Disease variant;GTP-binding;Intellectual disability;Isopeptide bond;Magnesium;Metal-binding;Microtubule;Nucleotide-binding;Phosphoprotein;Reference proteome	axon guidance [GO:0007411]; dorsal root ganglion development [GO:1990791]; microtubule cytoskeleton organization [GO:0000226]; mitotic cell cycle [GO:0000278]
LC-MS/MS	PFN1	FALSE	Protein	TRUE	PFN1	P07737	P07737	P07737	PROF1_HUMAN	Profilin-1 (Epididymis tissue protein Li 184a) (Profilin I)	140	3D-structure;Acetylation;Actin-binding;Amyotrophic lateral sclerosis;Cytoplasm;Cytoskeleton;Direct protein sequencing;Disease variant;Isopeptide bond;Neurodegeneration;Phosphoprotein;Reference proteome;Ubl conjugation	actin cytoskeleton organization [GO:0030036]; modification of postsynaptic actin cytoskeleton [GO:0098885]; modulation of chemical synaptic transmission [GO:0050804]; negative regulation of actin filament bundle assembly [GO:0032232]; negative regulation of actin filament polymerization [GO:0030837]; negative regulation of stress fiber assembly [GO:0051497]; neural tube closure [GO:0001843]; posi…
LC-MS/MS	THBS1	FALSE	Protein	TRUE	THBS1	P07996	P07996	P07996	TSP1_HUMAN	Thrombospondin-1 (Glycoprotein G)	1170	3D-structure;Alternative splicing;Angiogenesis;Apoptosis;Calcium;Cell adhesion;Disulfide bond;EGF-like domain;Endoplasmic reticulum;Extracellular matrix;Glycoprotein;Heparin-binding;Inflammatory response;Reference proteome;Repeat;Sarcoplasmic reticulum;Secreted;Signal;Unfolded protein response	apoptotic process [GO:0006915]; behavioral response to pain [GO:0048266]; cell adhesion [GO:0007155]; cell migration [GO:0016477]; cellular response to growth factor stimulus [GO:0071363]; cellular response to heat [GO:0034605]; cellular response to tumor necrosis factor [GO:0071356]; chronic inflammatory response [GO:0002544]; engulfment of apoptotic cell [GO:0043652]; immune response [GO:000695…
LC-MS/MS	RNASE1	FALSE	Protein	TRUE	RNASE1	P07998	P07998	P07998	RNAS1_HUMAN	Ribonuclease pancreatic (EC 4.6.1.18) (HP-RNase) (RIB-1) (RNase UpI-1) (Ribonuclease 1) (RNase 1) (Ribonuclease A) (RNase A)	156	3D-structure;Direct protein sequencing;Disulfide bond;Endonuclease;Glycoprotein;Hydrolase;Lyase;Nuclease;Reference proteome;Secreted;Signal	defense response to Gram-positive bacterium [GO:0050830]
LC-MS/MS	SERPINA6	FALSE	Protein	TRUE	SERPINA6	P08185	P08185	P08185	CBG_HUMAN	Corticosteroid-binding globulin (CBG) (Serpin A6) (Transcortin)	405	3D-structure;Direct protein sequencing;Disease variant;Glycoprotein;Lipid-binding;Reference proteome;Secreted;Signal;Steroid-binding;Transport	glucocorticoid metabolic process [GO:0008211]
LC-MS/MS	ITGA2B	FALSE	Protein	TRUE	ITGA2B	P08514	P08514	P08514	ITA2B_HUMAN	Integrin alpha-IIb (GPalpha IIb) (GPIIb) (Platelet membrane glycoprotein IIb) (CD antigen CD41) [Cleaved into: Integrin alpha-IIb heavy chain; Integrin alpha-IIb light chain, form 1; Integrin alpha-IIb light chain, form 2]	1039	3D-structure;Alternative splicing;Calcium;Cell adhesion;Cleavage on pair of basic residues;Direct protein sequencing;Disease variant;Disulfide bond;Glycoprotein;Integrin;Membrane;Metal-binding;Pyrrolidone carboxylic acid;Receptor;Reference proteome;Repeat;Signal;Transmembrane;Transmembrane helix	angiogenesis [GO:0001525]; cell adhesion mediated by integrin [GO:0033627]; cell-cell adhesion [GO:0098609]; cell-matrix adhesion [GO:0007160]; integrin-mediated signaling pathway [GO:0007229]; positive regulation of leukocyte migration [GO:0002687]
LC-MS/MS	LPA	FALSE	Protein	TRUE	LPA	P08519	P08519	P08519	APOA_HUMAN	Apolipoprotein(a) (Apo(a)) (Lp(a)) (EC 3.4.21.-)	2040	3D-structure;Atherosclerosis;Autocatalytic cleavage;Disulfide bond;Glycoprotein;Hydrolase;Kringle;Lipid transport;Protease;Reference proteome;Repeat;Serine protease;Signal;Transport	blood circulation [GO:0008015]; lipid metabolic process [GO:0006629]; lipid transport [GO:0006869]; proteolysis [GO:0006508]
LC-MS/MS	LPA	FALSE	Protein	FALSE	LPAL2	Q16609	Q16609	Q16609	LPAL2_HUMAN	Putative apolipoprotein(a)-like protein 2 (Apo(a)-like protein 2) (Lp(a)-liker protein 2) (Apolipoprotein a-related gene C protein) (Apo(a)rg-C)	132	Disulfide bond;Glycoprotein;Kringle;Reference proteome;Secreted;Signal
LC-MS/MS	PLEK	FALSE	Protein	TRUE	PLEK	P08567	P08567	P08567	PLEK_HUMAN	Pleckstrin (Platelet 47 kDa protein) (p47)	350	3D-structure;Acetylation;Phosphoprotein;Reference proteome;Repeat	actin cytoskeleton organization [GO:0030036]; cell projection organization [GO:0030030]; cortical actin cytoskeleton organization [GO:0030866]; hematopoietic progenitor cell differentiation [GO:0002244]; integrin-mediated signaling pathway [GO:0007229]; negative regulation of calcium-mediated signaling [GO:0050849]; negative regulation of G protein-coupled receptor signaling pathway [GO:0045744];…
LC-MS/MS	CD14	FALSE	Protein	TRUE	CD14	P08571	P08571	P08571	CD14_HUMAN	Monocyte differentiation antigen CD14 (Myeloid cell-specific leucine-rich glycoprotein) (CD antigen CD14) [Cleaved into: Monocyte differentiation antigen CD14, urinary form; Monocyte differentiation antigen CD14, membrane-bound form]	375	3D-structure;Cell membrane;Direct protein sequencing;Disulfide bond;Glycoprotein;Golgi apparatus;GPI-anchor;Immunity;Inflammatory response;Innate immunity;Leucine-rich repeat;Lipoprotein;Membrane;Reference proteome;Repeat;Secreted;Signal	apoptotic process [GO:0006915]; cell surface pattern recognition receptor signaling pathway [GO:0002752]; cell surface receptor signaling pathway [GO:0007166]; cellular response to diacyl bacterial lipopeptide [GO:0071726]; cellular response to lipopolysaccharide [GO:0071222]; cellular response to lipoteichoic acid [GO:0071223]; cellular response to molecule of bacterial origin [GO:0071219]; cell…
LC-MS/MS	CFH	FALSE	Protein	TRUE	CFH	P08603	P08603	P08603	CFAH_HUMAN	Complement factor H (H factor 1)	1231	3D-structure;Age-related macular degeneration;Alternative splicing;Complement alternate pathway;Direct protein sequencing;Disease variant;Disulfide bond;Glycoprotein;Hemolytic uremic syndrome;Host-virus interaction;Immunity;Innate immunity;Reference proteome;Repeat;Secreted;Signal;Sulfation;Sushi	complement activation [GO:0006956]; complement activation, alternative pathway [GO:0006957]; proteolysis [GO:0006508]; regulation of complement activation [GO:0030449]; regulation of complement activation, alternative pathway [GO:0030451]; regulation of complement-dependent cytotoxicity [GO:1903659]
LC-MS/MS	FCGR3[A-B]	FALSE	Protein	TRUE	FCGR3A	P08637	P08637	P08637	FCG3A_HUMAN	Low affinity immunoglobulin gamma Fc region receptor III-A (IgG Fc receptor III-A) (CD16-II) (CD16a antigen) (Fc-gamma RIII-alpha) (Fc-gamma RIII) (Fc-gamma RIIIa) (FcRIII) (FcRIIIa) (FcgammaRIIIA) (FcR-10) (IgG Fc receptor III-2) (CD antigen CD16a)	254	3D-structure;Cell membrane;Disulfide bond;Glycoprotein;IgG-binding protein;Immunity;Immunoglobulin domain;Membrane;Phosphoprotein;Receptor;Reference proteome;Repeat;Secreted;Signal;Transmembrane;Transmembrane helix	antibody-dependent cellular cytotoxicity [GO:0001788]; calcium-mediated signaling [GO:0019722]; cell surface receptor signaling pathway [GO:0007166]; Fc-gamma receptor signaling pathway [GO:0038094]; immune response [GO:0006955]; macrophage activation [GO:0042116]; natural killer cell activation [GO:0030101]; natural killer cell degranulation [GO:0043320]; natural killer cell mediated cytotoxicit…
LC-MS/MS	FCGR3[A-B]	FALSE	Protein	FALSE	FCGR3B	O75015	O75015	O75015	FCG3B_HUMAN	Low affinity immunoglobulin gamma Fc region receptor III-B (Fc-gamma RIII-beta) (CD16-I) (Fc-gamma RIII) (Fc-gamma RIIIb) (FcRIII) (FcRIIIb) (FcR-10) (IgG Fc receptor III-1) (CD antigen CD16b)	233	3D-structure;Cell membrane;Disulfide bond;Glycoprotein;GPI-anchor;IgG-binding protein;Immunoglobulin domain;Lipoprotein;Membrane;Receptor;Reference proteome;Repeat;Secreted;Signal	cell surface receptor signaling pathway [GO:0007166]; immune response [GO:0006955]; regulation of immune response [GO:0050776]
LC-MS/MS	SERPINF2	FALSE	Protein	TRUE	SERPINF2	P08697	P08697	P08697	A2AP_HUMAN	Alpha-2-antiplasmin (Alpha-2-AP) (Alpha-2-plasmin inhibitor) (Alpha-2-PI) (Serpin F2)	491	Acute phase;Alternative splicing;Direct protein sequencing;Disease variant;Disulfide bond;Glycoprotein;Isopeptide bond;Protease inhibitor;Reference proteome;Secreted;Serine protease inhibitor;Signal;Sulfation	acute-phase response [GO:0006953]; blood vessel morphogenesis [GO:0048514]; collagen fibril organization [GO:0030199]; fibrinolysis [GO:0042730]; maintenance of blood vessel diameter homeostasis by renin-angiotensin [GO:0002034]; negative regulation of fibrinolysis [GO:0051918]; negative regulation of plasminogen activation [GO:0010757]; positive regulation of cell differentiation [GO:0045597]; p…
LC-MS/MS	PKHD1	FALSE	Protein	TRUE	PKHD1	P08F94	P08F94	P08F94	PKHD1_HUMAN	Fibrocystin (Polycystic kidney and hepatic disease 1 protein) (Polyductin) (Tigmin)	4074	Alternative splicing;Cell membrane;Cell projection;Centromere;Chromosome;Ciliopathy;Cilium;Cytoplasm;Cytoskeleton;Disease variant;Endoplasmic reticulum;Glycoprotein;Golgi apparatus;Membrane;Nucleus;Receptor;Reference proteome;Repeat;Secreted;Signal;Transmembrane;Transmembrane helix	branching morphogenesis of an epithelial tube [GO:0048754]; cell-cell adhesion [GO:0098609]; cell-cell junction organization [GO:0045216]; cilium assembly [GO:0060271]; epithelial cell morphogenesis [GO:0003382]; establishment of centrosome localization [GO:0051660]; establishment of mitotic spindle orientation [GO:0000132]; homeostatic process [GO:0042592]; intracellular calcium ion homeostasis …
LC-MS/MS	C1S	FALSE	Protein	TRUE	C1S	P09871	P09871	P09871	C1S_HUMAN	Complement C1s subcomponent (EC 3.4.21.42) (C1 esterase) (Complement component 1 subcomponent s) [Cleaved into: Complement C1s subcomponent heavy chain; Complement C1s subcomponent light chain]	688	3D-structure;Calcium;Complement pathway;Direct protein sequencing;Disease variant;Disulfide bond;EGF-like domain;Ehlers-Danlos syndrome;Glycoprotein;Hydrolase;Hydroxylation;Immunity;Innate immunity;Metal-binding;Protease;Reference proteome;Repeat;Serine protease;Signal;Sushi	complement activation, classical pathway [GO:0006958]; innate immune response [GO:0045087]; proteolysis [GO:0006508]
LC-MS/MS	C4A	FALSE	Protein	TRUE	C4A	P0C0L4	P0C0L4	P0C0L4	CO4A_HUMAN	Complement C4-A (Acidic complement C4) (C3 and PZP-like alpha-2-macroglobulin domain-containing protein 2) [Cleaved into: Complement C4 beta chain; Complement C4-A alpha chain; C4a anaphylatoxin; C4b-A; C4d-A; Complement C4 gamma chain]	1744	3D-structure;Alternative splicing;Blood group antigen;Cell projection;Cleavage on pair of basic residues;Complement pathway;Direct protein sequencing;Disease variant;Disulfide bond;Glycoprotein;Immunity;Inflammatory response;Innate immunity;Phosphoprotein;Reference proteome;Secreted;Signal;Sulfation;Synapse;Systemic lupus erythematosus;Thioester bond	complement activation [GO:0006956]; complement activation, classical pathway [GO:0006958]; inflammatory response [GO:0006954]; innate immune response [GO:0045087]; positive regulation of apoptotic cell clearance [GO:2000427]
LC-MS/MS	C4B	FALSE	Protein	TRUE	C4B	P0C0L5	P0C0L5	P0C0L5	CO4B_HUMAN	Complement C4-B (Basic complement C4) (C3 and PZP-like alpha-2-macroglobulin domain-containing protein 3) [Cleaved into: Complement C4 beta chain; Complement C4-B alpha chain; C4a anaphylatoxin; C4b-B; C4d-B; Complement C4 gamma chain]	1744	3D-structure;Blood group antigen;Cell projection;Cleavage on pair of basic residues;Complement pathway;Direct protein sequencing;Disulfide bond;Glycoprotein;Immunity;Inflammatory response;Innate immunity;Phosphoprotein;Reference proteome;Secreted;Signal;Sulfation;Synapse;Systemic lupus erythematosus;Thioester bond	complement activation [GO:0006956]; complement activation, classical pathway [GO:0006958]; detection of molecule of bacterial origin [GO:0032490]; inflammatory response [GO:0006954]; innate immune response [GO:0045087]; opsonization [GO:0008228]; positive regulation of apoptotic cell clearance [GO:2000427]
LC-MS/MS	SAA1	TRUE	Protein	TRUE	SAA1	P0DJI8	P0DJI8	P0DJI8	SAA1_HUMAN	Serum amyloid A-1 protein (SAA) [Cleaved into: Amyloid protein A (Amyloid fibril protein AA); Serum amyloid protein A(2-104); Serum amyloid protein A(3-104); Serum amyloid protein A(2-103); Serum amyloid protein A(2-102); Serum amyloid protein A(4-101)]	122	3D-structure;Acute phase;Amyloid;Amyloidosis;Direct protein sequencing;HDL;Heparin-binding;Methylation;Reference proteome;Secreted;Signal	acute-phase response [GO:0006953]; lymphocyte chemotaxis [GO:0048247]; macrophage chemotaxis [GO:0048246]; negative regulation of inflammatory response [GO:0050728]; neutrophil chemotaxis [GO:0030593]; platelet activation [GO:0030168]; positive regulation of cell adhesion [GO:0045785]; positive regulation of cytokine production [GO:0001819]; positive regulation of cytosolic calcium ion concentrat…
LC-MS/MS	SAA2	TRUE	Protein	TRUE	SAA2	P0DJI9	P0DJI9	P0DJI9	SAA2_HUMAN	Serum amyloid A-2 protein (SAA2) [Cleaved into: Amyloid A2 protein (AA2)]	122	Acute phase;Alternative splicing;Amyloid;Amyloidosis;Direct protein sequencing;HDL;Reference proteome;Secreted;Signal	acute-phase response [GO:0006953]
LC-MS/MS	IG[H]E	FALSE	Ig peptide	TRUE	IGE	P0DOX4	P0DOX4	P0DOX4	IGE_HUMAN	Immunoglobulin epsilon heavy chain (Immunoglobulin epsilon heavy chain ND)	547	Adaptive immunity;Cell membrane;Direct protein sequencing;Disulfide bond;Glycoprotein;Immunity;Immunoglobulin;Immunoglobulin domain;Membrane;Pyrrolidone carboxylic acid;Repeat;Secreted	adaptive immune response [GO:0002250]
LC-MS/MS	IG[H]E	FALSE	Ig peptide	FALSE	IGHE	P01854	P01854	P01854	IGHE_HUMAN	Immunoglobulin heavy constant epsilon (Ig epsilon chain C region) (Ig epsilon chain C region ND)	546	3D-structure;Adaptive immunity;Alternative splicing;Cell membrane;Direct protein sequencing;Disulfide bond;Glycoprotein;Immunity;Immunoglobulin;Immunoglobulin domain;Inflammatory response;Membrane;Reference proteome;Repeat;Secreted;Transmembrane;Transmembrane helix	adaptive immune memory response [GO:0090716]; adaptive immune response [GO:0002250]; antibacterial humoral response [GO:0019731]; antibody-dependent cellular cytotoxicity [GO:0001788]; B cell antigen processing and presentation [GO:0002450]; B cell proliferation [GO:0042100]; B cell receptor signaling pathway [GO:0050853]; complement activation, classical pathway [GO:0006958]; eosinophil degranul…
LC-MS/MS	IG[H]G1	FALSE	Ig peptide	TRUE	IGG1	P0DOX5	P0DOX5	P0DOX5	IGG1_HUMAN	Immunoglobulin gamma-1 heavy chain (Immunoglobulin gamma-1 heavy chain NIE)	449	3D-structure;Adaptive immunity;Cell membrane;Direct protein sequencing;Disulfide bond;Glycoprotein;Immunity;Immunoglobulin;Immunoglobulin domain;Membrane;Pyrrolidone carboxylic acid;Repeat;Secreted	adaptive immune response [GO:0002250]
LC-MS/MS	IG[H]G1	FALSE	Ig peptide	FALSE	IGHG1	P01857	P01857	P01857	IGHG1_HUMAN	Immunoglobulin heavy constant gamma 1 (Ig gamma-1 chain C region) (Ig gamma-1 chain C region EU) (Ig gamma-1 chain C region KOL) (Ig gamma-1 chain C region NIE)	399	3D-structure;Adaptive immunity;Alternative splicing;Cell membrane;Chromosomal rearrangement;Direct protein sequencing;Disulfide bond;Glycoprotein;Immunity;Immunoglobulin;Immunoglobulin domain;Membrane;Reference proteome;Secreted;Transmembrane;Transmembrane helix	adaptive immune response [GO:0002250]; antibacterial humoral response [GO:0019731]; antibody-dependent cellular cytotoxicity [GO:0001788]; B cell receptor signaling pathway [GO:0050853]; complement activation, classical pathway [GO:0006958]; complement-dependent cytotoxicity [GO:0097278]
LC-MS/MS	IGL[1,C1,L5]	FALSE	Ig peptide	TRUE	IGL1	P0DOX8	P0DOX8	P0DOX8	IGL1_HUMAN	Immunoglobulin lambda-1 light chain (Immunoglobulin lambda-1 light chain MCG)	216	3D-structure;Adaptive immunity;Cell membrane;Direct protein sequencing;Disulfide bond;Immunity;Immunoglobulin;Immunoglobulin domain;Membrane;Pyrrolidone carboxylic acid;Secreted	adaptive immune response [GO:0002250]
LC-MS/MS	IGL[1,C1,L5]	FALSE	Ig peptide	FALSE	IGLL5	B9A064	B9A064	B9A064	IGLL5_HUMAN	Immunoglobulin lambda-like polypeptide 5 (G lambda-1) (Germline immunoglobulin lambda 1)	214	3D-structure;Alternative splicing;Disulfide bond;Immunoglobulin domain;Reference proteome;Secreted;Signal	immunoglobulin mediated immune response [GO:0016064]
LC-MS/MS	IGL[1,C1,L5]	FALSE	Ig peptide	FALSE	IGLC1	P0CG04	P0CG04	P0CG04	IGLC1_HUMAN	Immunoglobulin lambda constant 1 (Ig lambda chain C region MGC) (Ig lambda-1 chain C region)	106	3D-structure;Adaptive immunity;Bence-Jones protein;Cell membrane;Direct protein sequencing;Disulfide bond;Immunity;Immunoglobulin;Immunoglobulin domain;Membrane;Reference proteome;Secreted	adaptive immune response [GO:0002250]; B cell receptor signaling pathway [GO:0050853]; immune response [GO:0006955]; immunoglobulin mediated immune response [GO:0016064]
LC-MS/MS	IGL[1,C1,L5]	FALSE	Ig peptide	FALSE	IGLV2-8	P01709	P01709	P01709	LV208_HUMAN	Immunoglobulin lambda variable 2-8 (Ig lambda chain V-II region BO) (Ig lambda chain V-II region MGC)	118	3D-structure;Adaptive immunity;Cell membrane;Direct protein sequencing;Disulfide bond;Immunity;Immunoglobulin;Immunoglobulin domain;Membrane;Pyrrolidone carboxylic acid;Reference proteome;Secreted;Signal	adaptive immune response [GO:0002250]; immune response [GO:0006955]
LC-MS/MS	IGLC[2,3,6,7]	FALSE	Ig peptide	TRUE	IGLC2	P0DOY2	P0DOY2	P0DOY2	IGLC2_HUMAN	Immunoglobulin lambda constant 2 (Ig lambda chain C region Kern) (Ig lambda chain C region NIG-64) (Ig lambda chain C region SH) (Ig lambda chain C region X) (Ig lambda-2 chain C region)	106	3D-structure;Adaptive immunity;Bence-Jones protein;Cell membrane;Direct protein sequencing;Disulfide bond;Immunity;Immunoglobulin;Immunoglobulin domain;Membrane;Reference proteome;Secreted	immunoglobulin mediated immune response [GO:0016064]
LC-MS/MS	IGLC[2,3,6,7]	FALSE	Ig peptide	FALSE	IGLC3	P0DOY3	P0DOY3	P0DOY3	IGLC3_HUMAN	Immunoglobulin lambda constant 3 (Ig lambda chain C region DOT) (Ig lambda chain C region NEWM) (Ig lambda-3 chain C regions)	106	3D-structure;Adaptive immunity;Bence-Jones protein;Cell membrane;Direct protein sequencing;Disulfide bond;Immunity;Immunoglobulin;Immunoglobulin domain;Membrane;Reference proteome;Secreted	adaptive immune response [GO:0002250]; B cell receptor signaling pathway [GO:0050853]; immunoglobulin mediated immune response [GO:0016064]
LC-MS/MS	IGLC[2,3,6,7]	FALSE	Ig peptide	FALSE	IGLC6	P0CF74	P0CF74	P0CF74	IGLC6_HUMAN	Immunoglobulin lambda constant 6 (Ig lambda-6 chain C region)	106	Adaptive immunity;Cell membrane;Disulfide bond;Immunity;Immunoglobulin;Immunoglobulin domain;Membrane;Reference proteome;Secreted	adaptive immune response [GO:0002250]; B cell receptor signaling pathway [GO:0050853]; immunoglobulin mediated immune response [GO:0016064]
LC-MS/MS	IGLC[2,3,6,7]	FALSE	Ig peptide	FALSE	IGLC7	A0M8Q6	A0M8Q6	A0M8Q6	IGLC7_HUMAN	Immunoglobulin lambda constant 7 (Ig lambda-7 chain C region)	106	Adaptive immunity;Cell membrane;Disulfide bond;Immunity;Immunoglobulin;Immunoglobulin domain;Membrane;Reference proteome;Secreted	adaptive immune response [GO:0002250]; B cell receptor signaling pathway [GO:0050853]; immunoglobulin mediated immune response [GO:0016064]
LC-MS/MS	IGHV1-8	FALSE	Ig peptide	TRUE	IGHV1-8	P0DP01	P0DP01	P0DP01	HV108_HUMAN	Immunoglobulin heavy variable 1-8	117	3D-structure;Adaptive immunity;Cell membrane;Disulfide bond;Glycoprotein;Immunity;Immunoglobulin;Immunoglobulin domain;Membrane;Reference proteome;Secreted;Signal	immunoglobulin mediated immune response [GO:0016064]
LC-MS/MS	IGKV1[D]-13	FALSE	Ig peptide	TRUE	IGKV1-13	P0DP09	P0DP09	P0DP09	KV113_HUMAN	Immunoglobulin kappa variable 1-13	117	Adaptive immunity;Cell membrane;Disulfide bond;Immunity;Immunoglobulin;Immunoglobulin domain;Membrane;Reference proteome;Secreted;Signal	adaptive immune response [GO:0002250]; immune response [GO:0006955]
LC-MS/MS	IGKV1[D]-13	FALSE	Ig peptide	FALSE	IGKV1D-13	A0A0B4J2D9	A0A0B4J2D9	A0A0B4J2D9	KVD13_HUMAN	Immunoglobulin kappa variable 1D-13	117	Adaptive immunity;Cell membrane;Disulfide bond;Immunity;Immunoglobulin;Immunoglobulin domain;Membrane;Reference proteome;Secreted;Signal	adaptive immune response [GO:0002250]; immune response [GO:0006955]
LC-MS/MS	HLA-[A-c]	FALSE	Protein	TRUE	HLA-C	P10321	P10321	P10321	HLAC_HUMAN	HLA class I histocompatibility antigen, C alpha chain (HLA-C) (HLA-Cw) (Human leukocyte antigen C)	366	3D-structure;Adaptive immunity;Alternative splicing;Cell membrane;Disulfide bond;Endoplasmic reticulum;Glycoprotein;Host-virus interaction;Immunity;Innate immunity;Membrane;MHC I;Phosphoprotein;Reference proteome;Signal;Transmembrane;Transmembrane helix	adaptive immune response [GO:0002250]; antigen processing and presentation of endogenous peptide antigen via MHC class I via ER pathway, TAP-independent [GO:0002486]; antigen processing and presentation of endogenous peptide antigen via MHC class Ib [GO:0002476]; immune response [GO:0006955]; innate immune response [GO:0045087]; positive regulation of T cell mediated cytotoxicity [GO:0001916]
LC-MS/MS	HLA-[A-c]	FALSE	Protein	FALSE	HLA-B	P01889	P01889	P01889	HLAB_HUMAN	HLA class I histocompatibility antigen, B alpha chain (Human leukocyte antigen B) (HLA-B)	362	3D-structure;Adaptive immunity;Cell membrane;Direct protein sequencing;Disulfide bond;Endoplasmic reticulum;Glycoprotein;Host-virus interaction;Immunity;Innate immunity;Membrane;MHC I;Phosphoprotein;Reference proteome;Signal;Transmembrane;Transmembrane helix	adaptive immune response [GO:0002250]; antigen processing and presentation of endogenous peptide antigen via MHC class I via ER pathway, TAP-independent [GO:0002486]; antigen processing and presentation of endogenous peptide antigen via MHC class Ib [GO:0002476]; defense response [GO:0006952]; detection of bacterium [GO:0016045]; immune response [GO:0006955]; innate immune response [GO:0045087]; …
LC-MS/MS	HLA-[A-c]	FALSE	Protein	FALSE	HLA-A	P04439	P04439	P04439	HLAA_HUMAN	HLA class I histocompatibility antigen, A alpha chain (Human leukocyte antigen A) (HLA-A)	365	3D-structure;Adaptive immunity;Alternative splicing;Cell membrane;Direct protein sequencing;Disulfide bond;Endoplasmic reticulum;Glycoprotein;Host-virus interaction;Immunity;Immunoglobulin domain;Innate immunity;Membrane;MHC I;Phosphoprotein;Reference proteome;Signal;Sulfation;Transmembrane;Transmembrane helix;Ubl conjugation	antibacterial humoral response [GO:0019731]; antigen processing and presentation of endogenous peptide antigen via MHC class I [GO:0019885]; antigen processing and presentation of endogenous peptide antigen via MHC class I via ER pathway, TAP-dependent [GO:0002485]; antigen processing and presentation of endogenous peptide antigen via MHC class I via ER pathway, TAP-independent [GO:0002486]; anti…
LC-MS/MS	PTPRF	FALSE	Protein	TRUE	PTPRF	P10586	P10586	P10586	PTPRF_HUMAN	Receptor-type tyrosine-protein phosphatase F (EC 3.1.3.48) (Leukocyte common antigen related) (LAR)	1907	3D-structure;Alternative splicing;Cell adhesion;Disulfide bond;Glycoprotein;Heparin-binding;Hydrolase;Immunoglobulin domain;Membrane;Phosphoprotein;Protein phosphatase;Receptor;Reference proteome;Repeat;Signal;Transmembrane;Transmembrane helix	cell adhesion [GO:0007155]; cell migration [GO:0016477]; negative regulation of receptor binding [GO:1900121]; neuron projection regeneration [GO:0031102]; peptidyl-tyrosine dephosphorylation [GO:0035335]; regulation of axon regeneration [GO:0048679]; synaptic membrane adhesion [GO:0099560]; transmembrane receptor protein tyrosine phosphatase signaling pathway [GO:0007185]
LC-MS/MS	C7	FALSE	Protein	TRUE	C7	P10643	P10643	P10643	CO7_HUMAN	Complement component C7	843	3D-structure;Complement alternate pathway;Complement pathway;Cytolysis;Direct protein sequencing;Disease variant;Disulfide bond;EGF-like domain;Glycoprotein;Immunity;Innate immunity;Membrane attack complex;Reference proteome;Repeat;Secreted;Signal;Sushi	complement activation [GO:0006956]; complement activation, alternative pathway [GO:0006957]; complement activation, classical pathway [GO:0006958]; killing of cells of another organism [GO:0031640]; positive regulation of immune response [GO:0050778]
LC-MS/MS	C7	FALSE	Protein	FALSE	FAP	Q12884	Q12884	Q12884	SEPR_HUMAN	Prolyl endopeptidase FAP (EC 3.4.21.26) (170 kDa melanoma membrane-bound gelatinase) (Dipeptidyl peptidase FAP) (EC 3.4.14.5) (Fibroblast activation protein alpha) (FAPalpha) (Gelatine degradation protease FAP) (EC 3.4.21.-) (Integral membrane serine protease) (Post-proline cleaving enzyme) (Serine integral membrane protease) (SIMP) (Surface-expressed protease) (Seprase) [Cleaved into: Antiplasmi…	760	3D-structure;Alternative splicing;Angiogenesis;Apoptosis;Cell adhesion;Cell junction;Cell membrane;Cell projection;Cleavage on pair of basic residues;Cytoplasm;Direct protein sequencing;Disulfide bond;Glycoprotein;Hydrolase;Membrane;Protease;Reference proteome;Secreted;Serine protease;Signal-anchor;Transmembrane;Transmembrane helix	angiogenesis [GO:0001525]; cell adhesion [GO:0007155]; endothelial cell migration [GO:0043542]; melanocyte apoptotic process [GO:1902362]; melanocyte proliferation [GO:0097325]; negative regulation of cell proliferation involved in contact inhibition [GO:0060244]; negative regulation of extracellular matrix disassembly [GO:0010716]; negative regulation of extracellular matrix organization [GO:190…
LC-MS/MS	CHGA	FALSE	Protein	TRUE	CHGA	P10645	P10645	P10645	CMGA_HUMAN	Chromogranin-A (CgA) (Pituitary secretory protein I) (SP-I) [Cleaved into: Vasostatin-1 (Vasostatin I); Vasostatin-2 (Vasostatin II); EA-92; ES-43; Pancreastatin; SS-18; WA-8; WE-14; LF-19; Catestatin (SL21); AL-11; GV-19; GR-44; ER-37; GE-25; Serpinin-RRG; Serpinin; p-Glu serpinin precursor]	457	3D-structure;Amidation;Antibiotic;Antimicrobial;Calcium;Cleavage on pair of basic residues;Cytoplasmic vesicle;Direct protein sequencing;Disulfide bond;Fungicide;Glycoprotein;Oxidation;Phosphoprotein;Proteoglycan;Reference proteome;Secreted;Signal;Sulfation	adenylate cyclase-activating adrenergic receptor signaling pathway involved in cardiac muscle relaxation [GO:0086030]; defense response to bacterium [GO:0042742]; defense response to fungus [GO:0050832]; defense response to Gram-negative bacterium [GO:0050829]; defense response to Gram-positive bacterium [GO:0050830]; innate immune response [GO:0045087]; killing of cells of another organism [GO:0…
LC-MS/MS	HSPD1	FALSE	Protein	TRUE	HSPD1	P10809	P10809	P10809	CH60_HUMAN	60 kDa heat shock protein, mitochondrial (EC 5.6.1.7) (60 kDa chaperonin) (Chaperonin 60) (CPN60) (Heat shock protein 60) (HSP-60) (Hsp60) (HuCHA60) (Mitochondrial matrix protein P1) (P60 lymphocyte protein)	573	3D-structure;Acetylation;Alternative splicing;ATP-binding;Chaperone;Direct protein sequencing;Disease variant;Hereditary spastic paraplegia;Host-virus interaction;Isomerase;Isopeptide bond;Leukodystrophy;Mitochondrion;Neurodegeneration;Nucleotide-binding;Phosphoprotein;Reference proteome;Transit peptide;Ubl conjugation	'de novo' protein folding [GO:0006458]; activation of cysteine-type endopeptidase activity involved in apoptotic process [GO:0006919]; apoptotic mitochondrial changes [GO:0008637]; B cell activation [GO:0042113]; B cell proliferation [GO:0042100]; biological process involved in interaction with symbiont [GO:0051702]; cellular response to interleukin-7 [GO:0098761]; chaperone-mediated protein comp…
LC-MS/MS	CLU	FALSE	Protein	TRUE	CLU	P10909	P10909	P10909	CLUS_HUMAN	Clusterin (Aging-associated gene 4 protein) (Apolipoprotein J) (Apo-J) (Complement cytolysis inhibitor) (CLI) (Complement-associated protein SP-40,40) (Ku70-binding protein 1) (NA1/NA2) (Sulfated glycoprotein 2) (SGP-2) (Testosterone-repressed prostate message 2) (TRPM-2) [Cleaved into: Clusterin beta chain (ApoJalpha) (Complement cytolysis inhibitor a chain) (SP-40,40 beta-chain); Clusterin alph…	449	Alternative splicing;Apoptosis;Chaperone;Complement pathway;Cytoplasm;Cytoplasmic vesicle;Direct protein sequencing;Disulfide bond;Endoplasmic reticulum;Glycoprotein;Immunity;Innate immunity;Membrane;Microsome;Mitochondrion;Nucleus;Phosphoprotein;Reference proteome;Secreted;Signal;Ubl conjugation	cell morphogenesis [GO:0000902]; central nervous system myelin maintenance [GO:0032286]; chaperone-mediated protein complex assembly [GO:0051131]; chaperone-mediated protein folding [GO:0061077]; complement activation [GO:0006956]; complement activation, classical pathway [GO:0006958]; immune complex clearance [GO:0002434]; innate immune response [GO:0045087]; intrinsic apoptotic signaling pathwa…
LC-MS/MS	HSPA[2,8]	FALSE	Protein	TRUE	HSPA8	P11142	P11142	P11142	HSP7C_HUMAN	Heat shock cognate 71 kDa protein (EC 3.6.4.10) (Heat shock 70 kDa protein 8) (Lipopolysaccharide-associated protein 1) (LAP-1) (LPS-associated protein 1)	646	3D-structure;Acetylation;Alternative splicing;ATP-binding;Autophagy;Cell membrane;Chaperone;Cytoplasm;Direct protein sequencing;Host-virus interaction;Hydrolase;Isopeptide bond;Lysosome;Membrane;Methylation;mRNA processing;mRNA splicing;Nucleotide-binding;Nucleus;Phosphoprotein;Reference proteome;Repressor;Spliceosome;Stress response;Transcription;Transcription regulation;Ubl conjugation	ATP metabolic process [GO:0046034]; cellular response to starvation [GO:0009267]; cellular response to steroid hormone stimulus [GO:0071383]; chaperone cofactor-dependent protein refolding [GO:0051085]; chaperone-mediated autophagy [GO:0061684]; chaperone-mediated autophagy translocation complex disassembly [GO:1904764]; clathrin coat disassembly [GO:0072318]; late endosomal microautophagy [GO:00…
LC-MS/MS	HSPA[2,8]	FALSE	Protein	FALSE	HSPA2	P54652	P54652	P54652	HSP72_HUMAN	Heat shock-related 70 kDa protein 2 (Heat shock 70 kDa protein 2)	639	3D-structure;ATP-binding;Chaperone;Cytoplasm;Cytoskeleton;Differentiation;Methylation;Nucleotide-binding;Phosphoprotein;Reference proteome;Spermatogenesis;Stress response	chaperone cofactor-dependent protein refolding [GO:0051085]; male meiosis I [GO:0007141]; male meiotic nuclear division [GO:0007140]; negative regulation of inclusion body assembly [GO:0090084]; positive regulation of G2/M transition of mitotic cell cycle [GO:0010971]; positive regulation of protein phosphorylation [GO:0001934]; protein refolding [GO:0042026]; response to cold [GO:0009409]; respo…
LC-MS/MS	MBL2	FALSE	Protein	TRUE	MBL2	P11226	P11226	P11226	MBL2_HUMAN	Mannose-binding protein C (MBP-C) (Collectin-1) (MBP1) (Mannan-binding protein) (Mannose-binding lectin)	248	3D-structure;Calcium;Coiled coil;Collagen;Complement activation lectin pathway;Complement pathway;Direct protein sequencing;Disulfide bond;Hydroxylation;Immunity;Innate immunity;Lectin;Mannose-binding;Reference proteome;Repeat;Secreted;Signal	acute-phase response [GO:0006953]; antiviral innate immune response [GO:0140374]; cell surface pattern recognition receptor signaling pathway [GO:0002752]; complement activation, classical pathway [GO:0006958]; complement activation, lectin pathway [GO:0001867]; defense response to bacterium [GO:0042742]; defense response to Gram-positive bacterium [GO:0050830]; innate immune response [GO:0045087…
LC-MS/MS	F5	FALSE	Protein	TRUE	F5	P12259	P12259	P12259	FA5_HUMAN	Coagulation factor V (Activated protein C cofactor) (Proaccelerin, labile factor) [Cleaved into: Coagulation factor V heavy chain; Coagulation factor V light chain]	2224	3D-structure;Blood coagulation;Calcium;Copper;Disease variant;Disulfide bond;Glycoprotein;Hemostasis;Metal-binding;Phosphoprotein;Reference proteome;Repeat;Secreted;Signal;Sulfation;Thrombophilia;Zymogen	blood circulation [GO:0008015]; blood coagulation [GO:0007596]; response to vitamin K [GO:0032571]
LC-MS/MS	ACTN[1-4]	FALSE	Protein	TRUE	ACTN1	P12814	P12814	P12814	ACTN1_HUMAN	Alpha-actinin-1 (Alpha-actinin cytoskeletal isoform) (F-actin cross-linking protein) (Non-muscle alpha-actinin-1)	892	3D-structure;Acetylation;Actin-binding;Alternative splicing;Calcium;Cell junction;Cell membrane;Cell projection;Cytoplasm;Cytoskeleton;Direct protein sequencing;Disease variant;Membrane;Metal-binding;Phosphoprotein;Reference proteome;Repeat	actin cytoskeleton organization [GO:0030036]; actin filament bundle assembly [GO:0051017]; actin filament network formation [GO:0051639]; actin filament organization [GO:0007015]; focal adhesion assembly [GO:0048041]; muscle cell development [GO:0055001]; platelet formation [GO:0030220]; platelet morphogenesis [GO:0036344]; regulation of apoptotic process [GO:0042981]
LC-MS/MS	ACTN[1-4]	FALSE	Protein	FALSE	ACTN4	O43707	O43707	O43707	ACTN4_HUMAN	Alpha-actinin-4 (Non-muscle alpha-actinin 4)	911	3D-structure;Acetylation;Actin-binding;Alternative splicing;Calcium;Cell junction;Cytoplasm;Cytoskeleton;Disease variant;Metal-binding;Nucleus;Phosphoprotein;Protein transport;Reference proteome;Repeat;Transport	actin cytoskeleton organization [GO:0030036]; muscle cell development [GO:0055001]; negative regulation of substrate adhesion-dependent cell spreading [GO:1900025]; peroxisome proliferator activated receptor signaling pathway [GO:0035357]; positive regulation of cell migration [GO:0030335]; positive regulation of non-canonical NF-kappaB signal transduction [GO:1901224]; positive regulation of sod…
LC-MS/MS	C6	FALSE	Protein	TRUE	C6	P13671	P13671	P13671	CO6_HUMAN	Complement component C6	934	3D-structure;Complement pathway;Cytolysis;Direct protein sequencing;Disulfide bond;EGF-like domain;Glycoprotein;Immunity;Innate immunity;Membrane attack complex;Reference proteome;Repeat;Secreted;Signal;Sushi	complement activation [GO:0006956]; complement activation, classical pathway [GO:0006958]; in utero embryonic development [GO:0001701]; innate immune response [GO:0045087]; killing of cells of another organism [GO:0031640]; positive regulation of immune response [GO:0050778]
LC-MS/MS	SELL	FALSE	Protein	TRUE	SELL	P14151	P14151	P14151	LYAM1_HUMAN	L-selectin (CD62 antigen-like family member L) (Leukocyte adhesion molecule 1) (LAM-1) (Leukocyte surface antigen Leu-8) (Leukocyte-endothelial cell adhesion molecule 1) (LECAM1) (Lymph node homing receptor) (TQ1) (gp90-MEL) (CD antigen CD62L)	372	3D-structure;Alternative initiation;Calcium;Cell adhesion;Cell membrane;Disulfide bond;EGF-like domain;Glycoprotein;Lectin;Membrane;Metal-binding;Reference proteome;Repeat;Signal;Sushi;Transmembrane;Transmembrane helix	calcium-dependent cell-cell adhesion via plasma membrane cell adhesion molecules [GO:0016339]; cell adhesion [GO:0007155]; heterophilic cell-cell adhesion via plasma membrane cell adhesion molecules [GO:0007157]; leukocyte cell-cell adhesion [GO:0007159]; leukocyte tethering or rolling [GO:0050901]; response to cytokine [GO:0034097]
LC-MS/MS	PKM	FALSE	Protein	TRUE	PKM	P14618	P14618	P14618	KPYM_HUMAN	Pyruvate kinase PKM (EC 2.7.1.40) (Cytosolic thyroid hormone-binding protein) (CTHBP) (Opa-interacting protein 3) (OIP-3) (Pyruvate kinase 2/3) (Pyruvate kinase muscle isozyme) (Threonine-protein kinase PKM2) (EC 2.7.11.1) (Thyroid hormone-binding protein 1) (THBP1) (Tumor M2-PK) (Tyrosine-protein kinase PKM2) (EC 2.7.10.2) (p58)	531	3D-structure;Acetylation;Allosteric enzyme;Alternative splicing;ATP-binding;Cytoplasm;Direct protein sequencing;Glycolysis;Hydroxylation;Isopeptide bond;Kinase;Magnesium;Metal-binding;Methylation;Nucleotide-binding;Nucleus;Phosphoprotein;Potassium;Pyruvate;Reference proteome;Transferase;Translation regulation;Ubl conjugation	canonical glycolysis [GO:0061621]; cellular response to insulin stimulus [GO:0032869]; glycolytic process [GO:0006096]; phosphorylation [GO:0016310]; positive regulation of cytoplasmic translation [GO:2000767]; positive regulation of sprouting angiogenesis [GO:1903672]; positive regulation of transcription by RNA polymerase II [GO:0045944]; programmed cell death [GO:0012501]
LC-MS/MS	CPN1	FALSE	Protein	TRUE	CPN1	P15169	P15169	P15169	CBPN_HUMAN	Carboxypeptidase N catalytic chain (CPN) (EC 3.4.17.3) (Anaphylatoxin inactivator) (Arginine carboxypeptidase) (Carboxypeptidase N polypeptide 1) (Carboxypeptidase N small subunit) (Kininase-1) (Lysine carboxypeptidase) (Plasma carboxypeptidase B) (Serum carboxypeptidase N) (SCPN)	458	3D-structure;Carboxypeptidase;Direct protein sequencing;Disease variant;Disulfide bond;Glycoprotein;Hydrolase;Metal-binding;Metalloprotease;Protease;Reference proteome;Secreted;Signal;Zinc	bradykinin catabolic process [GO:0010815]; peptide metabolic process [GO:0006518]; protein catabolic process [GO:0030163]; protein processing [GO:0016485]; response to glucocorticoid [GO:0051384]
LC-MS/MS	IGLL1	FALSE	Ig peptide	TRUE	IGLL1	P15814	P15814	P15814	IGLL1_HUMAN	Immunoglobulin lambda-like polypeptide 1 (CD179 antigen-like family member B) (Ig lambda-5) (Immunoglobulin omega polypeptide) (Immunoglobulin-related protein 14.1) (CD antigen CD179b)	213	3D-structure;Alternative splicing;Disease variant;Disulfide bond;Endoplasmic reticulum;Immunoglobulin domain;Reference proteome;Secreted;Signal	immune response [GO:0006955]; immunoglobulin mediated immune response [GO:0016064]
LC-MS/MS	IGFBP2	FALSE	Protein	TRUE	IGFBP2	P18065	P18065	P18065	IBP2_HUMAN	Insulin-like growth factor-binding protein 2 (IBP-2) (IGF-binding protein 2) (IGFBP-2)	325	3D-structure;Direct protein sequencing;Disulfide bond;Glycoprotein;Growth factor binding;Growth regulation;Reference proteome;Secreted;Signal	cellular response to hormone stimulus [GO:0032870]; female pregnancy [GO:0007565]; negative regulation of canonical Wnt signaling pathway [GO:0090090]; positive regulation of activated T cell proliferation [GO:0042104]; regulation of insulin-like growth factor receptor signaling pathway [GO:0043567]; response to estradiol [GO:0032355]; response to estrogen [GO:0043627]; response to glucocorticoid…
LC-MS/MS	VCL	FALSE	Protein	TRUE	VCL	P18206	P18206	P18206	VINC_HUMAN	Vinculin (Metavinculin) (MV)	1134	3D-structure;Acetylation;Actin-binding;Alternative splicing;Cardiomyopathy;Cell adhesion;Cell junction;Cell membrane;Cell projection;Cytoplasm;Cytoskeleton;Direct protein sequencing;Disease variant;Lipoprotein;Membrane;Palmitate;Phosphoprotein;Reference proteome;Repeat	adherens junction assembly [GO:0034333]; apical junction assembly [GO:0043297]; axon extension [GO:0048675]; cell adhesion [GO:0007155]; cell-matrix adhesion [GO:0007160]; epithelial cell-cell adhesion [GO:0090136]; lamellipodium assembly [GO:0030032]; maintenance of blood-brain barrier [GO:0035633]; morphogenesis of an epithelium [GO:0002009]; negative regulation of cell migration [GO:0030336]; …
LC-MS/MS	LBP	FALSE	Protein	TRUE	LBP	P18428	P18428	P18428	LBP_HUMAN	Lipopolysaccharide-binding protein (LBP)	481	Antibiotic;Antimicrobial;Direct protein sequencing;Disulfide bond;Glycoprotein;Immunity;Innate immunity;Lipid transport;Membrane;Reference proteome;Secreted;Signal;Transport	acute-phase response [GO:0006953]; cell surface pattern recognition receptor signaling pathway [GO:0002752]; cellular defense response [GO:0006968]; cellular response to lipopolysaccharide [GO:0071222]; cellular response to lipoteichoic acid [GO:0071223]; defense response to Gram-negative bacterium [GO:0050829]; defense response to Gram-positive bacterium [GO:0050830]; detection of molecule of ba…
LC-MS/MS	ORM2	FALSE	Protein	TRUE	ORM2	P19652	P19652	P19652	A1AG2_HUMAN	Alpha-1-acid glycoprotein 2 (AGP 2) (Orosomucoid-2) (OMD 2)	201	3D-structure;Acute phase;Disulfide bond;Glycoprotein;Pyrrolidone carboxylic acid;Reference proteome;Secreted;Signal;Transport	acute-phase response [GO:0006953]; positive regulation of interleukin-1 beta production [GO:0032731]; positive regulation of interleukin-1 production [GO:0032732]; positive regulation of tumor necrosis factor production [GO:0032760]; regulation of immune system process [GO:0002682]
LC-MS/MS	ITIH2	FALSE	Protein	TRUE	ITIH2	P19823	P19823	P19823	ITIH2_HUMAN	Inter-alpha-trypsin inhibitor heavy chain H2 (ITI heavy chain H2) (ITI-HC2) (Inter-alpha-inhibitor heavy chain 2) (Inter-alpha-trypsin inhibitor complex component II) (Serum-derived hyaluronan-associated protein) (SHAP)	946	Direct protein sequencing;Disulfide bond;Gamma-carboxyglutamic acid;Glycoprotein;Phosphoprotein;Protease inhibitor;Proteoglycan;Reference proteome;Secreted;Serine protease inhibitor;Signal	hyaluronan metabolic process [GO:0030212]
LC-MS/MS	ITIH1	FALSE	Protein	TRUE	ITIH1	P19827	P19827	P19827	ITIH1_HUMAN	Inter-alpha-trypsin inhibitor heavy chain H1 (ITI heavy chain H1) (ITI-HC1) (Inter-alpha-inhibitor heavy chain 1) (Inter-alpha-trypsin inhibitor complex component III) (Serum-derived hyaluronan-associated protein) (SHAP)	911	3D-structure;Alternative splicing;Direct protein sequencing;Disulfide bond;Glycoprotein;Phosphoprotein;Protease inhibitor;Proteoglycan;Reference proteome;Secreted;Serine protease inhibitor;Signal	hyaluronan metabolic process [GO:0030212]
LC-MS/MS	PZP	FALSE	Protein	TRUE	PZP	P20742	P20742	P20742	PZP_HUMAN	Pregnancy zone protein (C3 and PZP-like alpha-2-macroglobulin domain-containing protein 6)	1482	Alternative splicing;Bait region;Direct protein sequencing;Disulfide bond;Glycoprotein;Protease inhibitor;Reference proteome;Secreted;Serine protease inhibitor;Signal;Thioester bond	female pregnancy [GO:0007565]
LC-MS/MS	C4BPB	FALSE	Protein	TRUE	C4BPB	P20851	P20851	P20851	C4BPB_HUMAN	C4b-binding protein beta chain	252	Alternative splicing;Complement pathway;Disulfide bond;Glycoprotein;Immunity;Innate immunity;Reference proteome;Repeat;Secreted;Signal;Sushi	blood coagulation [GO:0007596]; complement activation, classical pathway [GO:0006958]; innate immune response [GO:0045087]; negative regulation of complement activation, classical pathway [GO:0045959]; positive regulation of protein catabolic process [GO:0045732]; regulation of opsonization [GO:1903027]; response to symbiotic bacterium [GO:0009609]
LC-MS/MS	FLNA	FALSE	Protein	TRUE	FLNA	P21333	P21333	P21333	FLNA_HUMAN	Filamin-A (FLN-A) (Actin-binding protein 280) (ABP-280) (Alpha-filamin) (Endothelial actin-binding protein) (Filamin-1) (Non-muscle filamin)	2647	3D-structure;Acetylation;Actin-binding;Alternative splicing;Cell projection;Cilium biogenesis/degradation;Cytoplasm;Cytoskeleton;Deafness;Direct protein sequencing;Disease variant;Isopeptide bond;Phosphoprotein;Reference proteome;Repeat;Ubl conjugation	actin crosslink formation [GO:0051764]; actin cytoskeleton organization [GO:0030036]; adenylate cyclase-inhibiting dopamine receptor signaling pathway [GO:0007195]; angiogenesis [GO:0001525]; blood coagulation, intrinsic pathway [GO:0007597]; blood vessel remodeling [GO:0001974]; cell-cell junction organization [GO:0045216]; cerebral cortex development [GO:0021987]; cilium assembly [GO:0060271]; …
LC-MS/MS	GPX3	FALSE	Protein	TRUE	GPX3	P22352	P22352	P22352	GPX3_HUMAN	Glutathione peroxidase 3 (GPx-3) (GSHPx-3) (EC 1.11.1.9) (Extracellular glutathione peroxidase) (Plasma glutathione peroxidase) (GPx-P) (GSHPx-P)	226	3D-structure;Direct protein sequencing;Oxidoreductase;Peroxidase;Reference proteome;Secreted;Selenocysteine;Signal	hydrogen peroxide catabolic process [GO:0042744]; response to lipid hydroperoxide [GO:0006982]
LC-MS/MS	CPN2	FALSE	Protein	TRUE	CPN2	P22792	P22792	P22792	CPN2_HUMAN	Carboxypeptidase N subunit 2 (Carboxypeptidase N 83 kDa chain) (Carboxypeptidase N large subunit) (Carboxypeptidase N polypeptide 2) (Carboxypeptidase N regulatory subunit)	545	Direct protein sequencing;Disulfide bond;Glycoprotein;Leucine-rich repeat;Reference proteome;Repeat;Secreted;Signal	protein stabilization [GO:0050821]
LC-MS/MS	PROZ	FALSE	Protein	TRUE	PROZ	P22891	P22891	P22891	PROZ_HUMAN	Vitamin K-dependent protein Z	400	3D-structure;Alternative splicing;Blood coagulation;Calcium;Cleavage on pair of basic residues;Direct protein sequencing;Disulfide bond;EGF-like domain;Gamma-carboxyglutamic acid;Glycoprotein;Hemostasis;Hydroxylation;Reference proteome;Repeat;Secreted;Serine protease homolog;Signal	blood coagulation [GO:0007596]; proteolysis [GO:0006508]
LC-MS/MS	IGHV1-2	FALSE	Ig peptide	TRUE	IGHV1-2	P23083	P23083	P23083	HV102_HUMAN	Immunoglobulin heavy variable 1-2 (Ig heavy chain V-I region ND) (Ig heavy chain V-I region V35)	117	3D-structure;Adaptive immunity;Cell membrane;Direct protein sequencing;Disulfide bond;Immunity;Immunoglobulin;Immunoglobulin domain;Membrane;Pyrrolidone carboxylic acid;Reference proteome;Secreted;Signal	immune response [GO:0006955]; immunoglobulin mediated immune response [GO:0016064]
LC-MS/MS	FBLN1	FALSE	Protein	TRUE	FBLN1	P23142	P23142	P23142	FBLN1_HUMAN	Fibulin-1 (FIBL-1)	703	Alternative splicing;Calcium;Chromosomal rearrangement;Direct protein sequencing;Disulfide bond;EGF-like domain;Extracellular matrix;Glycoprotein;Host-virus interaction;Reference proteome;Repeat;Secreted;Signal	blood coagulation, fibrin clot formation [GO:0072378]; embryo implantation [GO:0007566]; extracellular matrix organization [GO:0030198]; negative regulation of cell adhesion [GO:0007162]; negative regulation of cell motility [GO:2000146]; negative regulation of ERK1 and ERK2 cascade [GO:0070373]; negative regulation of protein phosphorylation [GO:0001933]; negative regulation of stem cell prolife…
LC-MS/MS	CFL[1-2]	FALSE	Protein	TRUE	CFL1	P23528	P23528	P23528	COF1_HUMAN	Cofilin-1 (18 kDa phosphoprotein) (p18) (Cofilin, non-muscle isoform)	166	3D-structure;Acetylation;Actin-binding;Cell membrane;Cell projection;Cytoplasm;Cytoskeleton;Direct protein sequencing;Host-virus interaction;Isopeptide bond;Membrane;Nucleus;Phosphoprotein;Reference proteome;Ubl conjugation	actin cytoskeleton organization [GO:0030036]; actin filament depolymerization [GO:0030042]; actin filament fragmentation [GO:0030043]; actin filament severing [GO:0051014]; cytoskeleton organization [GO:0007010]; establishment of spindle localization [GO:0051293]; mitotic cytokinesis [GO:0000281]; negative regulation of apoptotic process [GO:0043066]; positive regulation by host of viral process …
LC-MS/MS	CFL[1-2]	FALSE	Protein	FALSE	CFL2	Q9Y281	Q9Y281	Q9Y281	COF2_HUMAN	Cofilin-2 (Cofilin, muscle isoform)	166	3D-structure;Acetylation;Actin-binding;Alternative splicing;Cytoplasm;Cytoskeleton;Direct protein sequencing;Disease variant;Nemaline myopathy;Nucleus;Phosphoprotein;Reference proteome	actin filament depolymerization [GO:0030042]; actin filament fragmentation [GO:0030043]; actin filament severing [GO:0051014]; muscle cell cellular homeostasis [GO:0046716]; positive regulation of actin filament depolymerization [GO:0030836]; sarcomere organization [GO:0045214]; skeletal muscle tissue development [GO:0007519]
LC-MS/MS	AZGP1	FALSE	Protein	TRUE	AZGP1	P25311	P25311	P25311	ZA2G_HUMAN	Zinc-alpha-2-glycoprotein (Zn-alpha-2-GP) (Zn-alpha-2-glycoprotein)	298	3D-structure;Direct protein sequencing;Disulfide bond;Glycoprotein;Pyrrolidone carboxylic acid;Reference proteome;Secreted;Signal	cell adhesion [GO:0007155]; detection of chemical stimulus involved in sensory perception of bitter taste [GO:0001580]; immune response [GO:0006955]; negative regulation of cell population proliferation [GO:0008285]; retina homeostasis [GO:0001895]
LC-MS/MS	MST1	FALSE	Protein	TRUE	MST1	P26927	P26927	P26927	HGFL_HUMAN	Hepatocyte growth factor-like protein (Macrophage stimulatory protein) (Macrophage-stimulating protein) (MSP) [Cleaved into: Hepatocyte growth factor-like protein alpha chain; Hepatocyte growth factor-like protein beta chain]	711	3D-structure;Direct protein sequencing;Disulfide bond;Glycoprotein;Kringle;Reference proteome;Repeat;Secreted;Serine protease homolog;Signal	negative regulation of gluconeogenesis [GO:0045721]; proteolysis [GO:0006508]; regulation of cAMP-dependent protein kinase activity [GO:2000479]; regulation of receptor signaling pathway via JAK-STAT [GO:0046425]
LC-MS/MS	MST1	FALSE	Protein	FALSE	MST1L	Q2TV78	Q2TV78	Q2TV78	MST1L_HUMAN	Putative macrophage stimulating 1-like protein (Brain rescue factor 1) (BRF-1) (Hepatocyte growth factor-like protein homolog)	715	Alternative splicing;Disulfide bond;Hydrolase;Kringle;Protease;Reference proteome;Repeat;Secreted;Serine protease homolog;Signal	proteolysis [GO:0006508]; regulation of receptor signaling pathway via JAK-STAT [GO:0046425]
LC-MS/MS	PON1	FALSE	Protein	TRUE	PON1	P27169	P27169	P27169	PON1_HUMAN	Serum paraoxonase/arylesterase 1 (PON 1) (EC 3.1.1.2) (EC 3.1.1.81) (EC 3.1.8.1) (Aromatic esterase 1) (A-esterase 1) (K-45) (Serum aryldialkylphosphatase 1)	355	3D-structure;Calcium;Direct protein sequencing;Disulfide bond;Glycoprotein;HDL;Hydrolase;Metal-binding;Reference proteome;Secreted;Signal	aromatic compound catabolic process [GO:0019439]; carboxylic acid catabolic process [GO:0046395]; cholesterol metabolic process [GO:0008203]; organophosphate catabolic process [GO:0046434]; phosphatidylcholine metabolic process [GO:0046470]; positive regulation of binding [GO:0051099]; positive regulation of cholesterol efflux [GO:0010875]; positive regulation of transporter activity [GO:0032411]…
LC-MS/MS	CFP	FALSE	Protein	TRUE	CFP	P27918	P27918	P27918	PROP_HUMAN	Properdin (Complement factor P)	469	3D-structure;Complement alternate pathway;Disease variant;Disulfide bond;Glycoprotein;Immunity;Innate immunity;Reference proteome;Repeat;Secreted;Signal	complement activation [GO:0006956]; complement activation, alternative pathway [GO:0006957]; defense response to bacterium [GO:0042742]; immune response [GO:0006955]; positive regulation of immune response [GO:0050778]; positive regulation of opsonization [GO:1903028]
LC-MS/MS	SERPINA4	FALSE	Protein	TRUE	SERPINA4	P29622	P29622	P29622	KAIN_HUMAN	Kallistatin (Kallikrein inhibitor) (Peptidase inhibitor 4) (PI-4) (Serpin A4)	427	3D-structure;Direct protein sequencing;Glycoprotein;Protease inhibitor;Reference proteome;Secreted;Serine protease inhibitor;Signal
LC-MS/MS	PRDX[1-2]	FALSE	Protein	TRUE	PRDX2	P32119	P32119	P32119	PRDX2_HUMAN	Peroxiredoxin-2 (EC 1.11.1.24) (Natural killer cell-enhancing factor B) (NKEF-B) (PRP) (Thiol-specific antioxidant protein) (TSA) (Thioredoxin peroxidase 1) (Thioredoxin-dependent peroxide reductase 1) (Thioredoxin-dependent peroxiredoxin 2)	198	3D-structure;Acetylation;Alternative splicing;Antioxidant;Cytoplasm;Direct protein sequencing;Disulfide bond;Oxidoreductase;Peroxidase;Phosphoprotein;Redox-active center;Reference proteome	cell redox homeostasis [GO:0045454]; cellular response to oxidative stress [GO:0034599]; defense response to tumor cell [GO:0002357]; extrinsic apoptotic signaling pathway [GO:0097191]; hydrogen peroxide catabolic process [GO:0042744]; leukocyte activation [GO:0045321]; negative regulation of apoptotic process [GO:0043066]; negative regulation of extrinsic apoptotic signaling pathway in absence o…
LC-MS/MS	PRDX[1-2]	FALSE	Protein	FALSE	PRDX1	Q06830	Q06830	Q06830	PRDX1_HUMAN	Peroxiredoxin-1 (EC 1.11.1.24) (Natural killer cell-enhancing factor A) (NKEF-A) (Proliferation-associated gene protein) (PAG) (Thioredoxin peroxidase 2) (Thioredoxin-dependent peroxide reductase 2) (Thioredoxin-dependent peroxiredoxin 1)	199	3D-structure;Acetylation;Antioxidant;Cytoplasm;Direct protein sequencing;Disulfide bond;Isopeptide bond;Oxidoreductase;Peroxidase;Phosphoprotein;Redox-active center;Reference proteome;Ubl conjugation	cell population proliferation [GO:0008283]; cell redox homeostasis [GO:0045454]; erythrocyte homeostasis [GO:0034101]; fibroblast proliferation [GO:0048144]; hydrogen peroxide catabolic process [GO:0042744]; leukocyte activation [GO:0045321]; natural killer cell activation [GO:0030101]; natural killer cell mediated cytotoxicity [GO:0042267]; regulation of non-canonical NF-kappaB signal transducti…
LC-MS/MS	CTNNB1	FALSE	Protein	TRUE	CTNNB1	P35222	P35222	P35222	CTNB1_HUMAN	Catenin beta-1 (Beta-catenin)	781	3D-structure;Acetylation;Activator;Cell adhesion;Cell junction;Cell membrane;Cell projection;Chromosomal rearrangement;Cytoplasm;Cytoskeleton;Disease variant;Glycoprotein;Host-virus interaction;Intellectual disability;Membrane;Neurogenesis;Nucleus;Phosphoprotein;Reference proteome;Repeat;S-nitrosylation;Synapse;Transcription;Transcription regulation;Ubl conjugation;Wnt signaling pathway	acinar cell differentiation [GO:0090425]; adherens junction assembly [GO:0034333]; anterior/posterior axis specification [GO:0009948]; apoptotic signaling pathway [GO:0097190]; astrocyte-dopaminergic neuron signaling [GO:0036520]; bone resorption [GO:0045453]; branching involved in blood vessel morphogenesis [GO:0001569]; branching involved in ureteric bud morphogenesis [GO:0001658]; canonical NF…
LC-MS/MS	SAA4	TRUE	Protein	TRUE	SAA4	P35542	P35542	P35542	SAA4_HUMAN	Serum amyloid A-4 protein (Constitutively expressed serum amyloid A protein) (C-SAA)	130	Acute phase;Direct protein sequencing;Glycoprotein;HDL;Reference proteome;Secreted;Signal	acute-phase response [GO:0006953]
LC-MS/MS	MYH[9-11]	FALSE	Protein	TRUE	MYH9	P35579	P35579	P35579	MYH9_HUMAN	Myosin-9 (Cellular myosin heavy chain, type A) (Myosin heavy chain 9) (Myosin heavy chain, non-muscle IIa) (Non-muscle myosin heavy chain A) (NMMHC-A) (Non-muscle myosin heavy chain IIa) (NMMHC II-a) (NMMHC-IIA)	1960	3D-structure;Acetylation;Actin-binding;Alport syndrome;Alternative splicing;ATP-binding;Calmodulin-binding;Cataract;Cell adhesion;Cell shape;Coiled coil;Cytoplasm;Cytoplasmic vesicle;Cytoskeleton;Deafness;Direct protein sequencing;Disease variant;Methylation;Motor protein;Myosin;Non-syndromic deafness;Nucleotide-binding;Phosphoprotein;Reference proteome;Ubl conjugation	actin cytoskeleton organization [GO:0030036]; actin filament-based movement [GO:0030048]; actomyosin structure organization [GO:0031032]; angiogenesis [GO:0001525]; blood vessel endothelial cell migration [GO:0043534]; cortical granule exocytosis [GO:0060471]; cytokinetic process [GO:0032506]; establishment of meiotic spindle localization [GO:0051295]; establishment of T cell polarity [GO:0001768…
LC-MS/MS	MYH[9-11]	FALSE	Protein	FALSE	MYH11	P35749	P35749	P35749	MYH11_HUMAN	Myosin-11 (Myosin heavy chain 11) (Myosin heavy chain, smooth muscle isoform) (SMMHC)	1972	Actin-binding;Alternative splicing;Aortic aneurysm;ATP-binding;Calmodulin-binding;Chromosomal rearrangement;Coiled coil;Disease variant;Methylation;Motor protein;Muscle protein;Myosin;Nucleotide-binding;Phosphoprotein;Proto-oncogene;Reference proteome;Thick filament	actomyosin structure organization [GO:0031032]; cardiac muscle cell development [GO:0055013]; elastic fiber assembly [GO:0048251]; skeletal muscle myosin thick filament assembly [GO:0030241]; smooth muscle contraction [GO:0006939]
LC-MS/MS	IGFALS	FALSE	Protein	TRUE	IGFALS	P35858	P35858	P35858	ALS_HUMAN	Insulin-like growth factor-binding protein complex acid labile subunit (ALS)	605	3D-structure;Alternative splicing;Cell adhesion;Direct protein sequencing;Disease variant;Glycoprotein;Leucine-rich repeat;Reference proteome;Repeat;Secreted;Signal	cell adhesion [GO:0007155]; signal transduction [GO:0007165]
LC-MS/MS	SERPINF1	FALSE	Protein	TRUE	SERPINF1	P36955	P36955	P36955	PEDF_HUMAN	Pigment epithelium-derived factor (PEDF) (Cell proliferation-inducing gene 35 protein) (EPC-1) (Serpin F1)	418	3D-structure;Direct protein sequencing;Dwarfism;Glycoprotein;Osteogenesis imperfecta;Phosphoprotein;Pyrrolidone carboxylic acid;Reference proteome;Secreted;Signal	cellular response to cobalt ion [GO:0071279]; cellular response to dexamethasone stimulus [GO:0071549]; cellular response to glucose stimulus [GO:0071333]; cellular response to retinoic acid [GO:0071300]; epithelial cell proliferation involved in prostate gland development [GO:0060767]; kidney development [GO:0001822]; negative regulation of angiogenesis [GO:0016525]; negative regulation of endot…
LC-MS/MS	CFHR2	FALSE	Protein	TRUE	CFHR2	P36980	P36980	P36980	FHR2_HUMAN	Complement factor H-related protein 2 (FHR-2) (DDESK59) (H factor-like 3) (H factor-like protein 2)	270	3D-structure;Alternative splicing;Direct protein sequencing;Disulfide bond;Glycoprotein;Reference proteome;Repeat;Secreted;Signal;Sushi	complement activation [GO:0006956]; cytolysis by host of symbiont cells [GO:0051838]; negative regulation of protein binding [GO:0032091]
LC-MS/MS	TAGLN[2-3]	FALSE	Protein	TRUE	TAGLN2	P37802	P37802	P37802	TAGL2_HUMAN	Transgelin-2 (Epididymis tissue protein Li 7e) (SM22-alpha homolog)	199	3D-structure;Acetylation;Alternative splicing;Direct protein sequencing;Isopeptide bond;Methylation;Phosphoprotein;Reference proteome;Ubl conjugation	actin filament organization [GO:0007015]; epithelial cell differentiation [GO:0030855]
LC-MS/MS	TAGLN[2-3]	FALSE	Protein	FALSE	TAGLN3	Q9UI15	Q9UI15	Q9UI15	TAGL3_HUMAN	Transgelin-3 (Neuronal protein 22) (NP22) (Neuronal protein NP25)	199	Direct protein sequencing;Phosphoprotein;Reference proteome	actin filament organization [GO:0007015]; central nervous system development [GO:0007417]; negative regulation of transcription by RNA polymerase II [GO:0000122]
LC-MS/MS	PTGDS	FALSE	Protein	TRUE	PTGDS	P41222	P41222	P41222	PTGDS_HUMAN	Prostaglandin-H2 D-isomerase (EC 5.3.99.2) (Beta-trace protein) (Cerebrin-28) (Glutathione-independent PGD synthase) (Lipocalin-type prostaglandin-D synthase) (L-PGDS) (Prostaglandin-D2 synthase) (PGD2 synthase) (PGDS) (PGDS2)	190	3D-structure;Cytoplasm;Direct protein sequencing;Disulfide bond;Endoplasmic reticulum;Fatty acid biosynthesis;Fatty acid metabolism;Glycoprotein;Golgi apparatus;Isomerase;Lipid biosynthesis;Lipid metabolism;Mast cell degranulation;Membrane;Nucleus;Prostaglandin biosynthesis;Prostaglandin metabolism;Reference proteome;Secreted;Signal;Transport	cyclooxygenase pathway [GO:0019371]; gene expression [GO:0010467]; mast cell degranulation [GO:0043303]; negative regulation of male germ cell proliferation [GO:2000255]; prostaglandin biosynthetic process [GO:0001516]; regulation of circadian sleep/wake cycle, sleep [GO:0045187]; response to glucocorticoid [GO:0051384]
LC-MS/MS	BTD	FALSE	Protein	TRUE	BTD	P43251	P43251	P43251	BTD_HUMAN	Biotinidase (Biotinase) (EC 3.5.1.12)	543	Alternative splicing;Direct protein sequencing;Disease variant;Glycoprotein;Hydrolase;Reference proteome;Secreted;Signal	biotin metabolic process [GO:0006768]; central nervous system development [GO:0007417]
LC-MS/MS	AFM	FALSE	Protein	TRUE	AFM	P43652	P43652	P43652	AFAM_HUMAN	Afamin (Alpha-albumin) (Alpha-Alb)	599	3D-structure;Direct protein sequencing;Disulfide bond;Glycoprotein;Protein transport;Reference proteome;Repeat;Secreted;Signal;Transport	protein stabilization [GO:0050821]; protein transport within extracellular region [GO:0071693]; vitamin transport [GO:0051180]
LC-MS/MS	MASP1	FALSE	Protein	TRUE	MASP1	P48740	P48740	P48740	MASP1_HUMAN	Mannan-binding lectin serine protease 1 (EC 3.4.21.-) (Complement factor MASP-3) (Complement-activating component of Ra-reactive factor) (Mannose-binding lectin-associated serine protease 1) (MASP-1) (Mannose-binding protein-associated serine protease) (Ra-reactive factor serine protease p100) (RaRF) (Serine protease 5) [Cleaved into: Mannan-binding lectin serine protease 1 heavy chain; Mannan-bi…	699	3D-structure;Alternative splicing;Autocatalytic cleavage;Calcium;Complement activation lectin pathway;Direct protein sequencing;Disease variant;Disulfide bond;EGF-like domain;Glycoprotein;Hydrolase;Hydroxylation;Immunity;Innate immunity;Metal-binding;Protease;Reference proteome;Repeat;Secreted;Serine protease;Signal;Sushi	complement activation, lectin pathway [GO:0001867]; negative regulation of complement activation [GO:0045916]; zymogen activation [GO:0031638]
LC-MS/MS	COMP;THBS4	FALSE	Protein	TRUE	COMP	P49747	P49747	P49747	COMP_HUMAN	Cartilage oligomeric matrix protein (COMP) (Thrombospondin-5) (TSP5)	757	3D-structure;Alternative splicing;Apoptosis;Calcium;Cell adhesion;Direct protein sequencing;Disease variant;Disulfide bond;Dwarfism;EGF-like domain;Extracellular matrix;Glycoprotein;Heparin-binding;Reference proteome;Repeat;Secreted;Signal	animal organ morphogenesis [GO:0009887]; apoptotic process [GO:0006915]; artery morphogenesis [GO:0048844]; BMP signaling pathway [GO:0030509]; bone mineralization [GO:0030282]; cartilage homeostasis [GO:1990079]; cellular senescence [GO:0090398]; chondrocyte development [GO:0002063]; chondrocyte proliferation [GO:0035988]; collagen fibril organization [GO:0030199]; growth plate cartilage develop…
LC-MS/MS	COMP;THBS4	FALSE	Protein	FALSE	THBS4	P35443	P35443	P35443	TSP4_HUMAN	Thrombospondin-4	961	Calcium;Cell adhesion;Disulfide bond;EGF-like domain;Endoplasmic reticulum;Extracellular matrix;Glycoprotein;Growth factor;Mitogen;Reference proteome;Repeat;Sarcoplasmic reticulum;Secreted;Signal;Tissue remodeling;Unfolded protein response	behavioral response to pain [GO:0048266]; endothelial cell-cell adhesion [GO:0071603]; myoblast migration [GO:0051451]; negative regulation of angiogenesis [GO:0016525]; positive regulation of cell division [GO:0051781]; positive regulation of endothelial cell proliferation [GO:0001938]; positive regulation of neutrophil chemotaxis [GO:0090023]; positive regulation of peptidyl-tyrosine phosphoryl…
LC-MS/MS	SELENOP	FALSE	Protein	TRUE	SELENOP	P49908	P49908	P49908	SEPP1_HUMAN	Selenoprotein P (SeP)	381	Direct protein sequencing;Glycoprotein;Phosphoprotein;Reference proteome;Secreted;Selenium;Selenocysteine;Signal	brain development [GO:0007420]; locomotory behavior [GO:0007626]; post-embryonic development [GO:0009791]; regulation of growth [GO:0040008]; response to oxidative stress [GO:0006979]; selenium compound metabolic process [GO:0001887]; sexual reproduction [GO:0019953]
LC-MS/MS	CAMP	FALSE	Protein	TRUE	CAMP	P49913	P49913	P49913	CAMP_HUMAN	Cathelicidin antimicrobial peptide (18 kDa cationic antimicrobial protein) (CAP-18) (hCAP-18) [Cleaved into: Antibacterial peptide FALL-39 (FALL-39 peptide antibiotic); Antibacterial peptide LL-37; Antibacterial peptide KR-20; Antibacterial peptide LL-23; Antibacterial peptide LL-29; Antibacterial peptide KS-30; Antibacterial peptide RK-31; Antibacterial peptide FF-33]	170	3D-structure;Antibiotic;Antimicrobial;Cleavage on pair of basic residues;Direct protein sequencing;Disulfide bond;Immunity;Innate immunity;Pharmaceutical;Reference proteome;Secreted;Signal	amyloid fibril formation [GO:1990000]; antibacterial humoral response [GO:0019731]; antimicrobial humoral immune response mediated by antimicrobial peptide [GO:0061844]; cellular response to interleukin-1 [GO:0071347]; cellular response to interleukin-6 [GO:0071354]; cellular response to lipopolysaccharide [GO:0071222]; cellular response to peptidoglycan [GO:0071224]; cellular response to tumor n…
LC-MS/MS	VASP	FALSE	Protein	TRUE	VASP	P50552	P50552	P50552	VASP_HUMAN	Vasodilator-stimulated phosphoprotein (VASP)	380	3D-structure;Acetylation;Actin-binding;Cell junction;Cell membrane;Cell projection;Coiled coil;Cytoplasm;Cytoskeleton;Direct protein sequencing;Membrane;Phosphoprotein;Reference proteome;Repeat;SH3-binding;Tight junction	actin cytoskeleton organization [GO:0030036]; actin polymerization or depolymerization [GO:0008154]; axon guidance [GO:0007411]; neural tube closure [GO:0001843]; positive regulation of actin filament polymerization [GO:0030838]; protein homotetramerization [GO:0051289]
LC-MS/MS	LUM	FALSE	Protein	TRUE	LUM	P51884	P51884	P51884	LUM_HUMAN	Lumican (Keratan sulfate proteoglycan lumican) (KSPG lumican)	338	Direct protein sequencing;Disulfide bond;Extracellular matrix;Glycoprotein;Leucine-rich repeat;Phosphoprotein;Proteoglycan;Pyrrolidone carboxylic acid;Reference proteome;Repeat;Secreted;Signal;Sulfation	collagen fibril organization [GO:0030199]; positive regulation of transcription by RNA polymerase II [GO:0045944]; positive regulation of transforming growth factor beta1 production [GO:0032914]; visual perception [GO:0007601]
LC-MS/MS	ARHGDIB	FALSE	Protein	TRUE	ARHGDIB	P52566	P52566	P52566	GDIR2_HUMAN	Rho GDP-dissociation inhibitor 2 (Rho GDI 2) (Ly-GDI) (Rho-GDI beta)	201	3D-structure;Acetylation;Cytoplasm;Direct protein sequencing;GTPase activation;Phosphoprotein;Reference proteome	cellular response to redox state [GO:0071461]; negative regulation of trophoblast cell migration [GO:1901164]; regulation of Rho protein signal transduction [GO:0035023]; Rho protein signal transduction [GO:0007266]
LC-MS/MS	CRISP3	FALSE	Protein	TRUE	CRISP3	P54108	P54108	P54108	CRIS3_HUMAN	Cysteine-rich secretory protein 3 (CRISP-3) (Specific granule protein of 28 kDa) (SGP28)	245	Alternative splicing;Disulfide bond;Glycoprotein;Reference proteome;Secreted;Signal	defense response [GO:0006952]; innate immune response [GO:0045087]
LC-MS/MS	PLTP	FALSE	Protein	TRUE	PLTP	P55058	P55058	P55058	PLTP_HUMAN	Phospholipid transfer protein (Lipid transfer protein II)	493	Alternative splicing;Direct protein sequencing;Disulfide bond;Glycoprotein;Lipid transport;Nucleus;Reference proteome;Secreted;Signal;Transport	ceramide transport [GO:0035627]; flagellated sperm motility [GO:0030317]; glycolipid transport [GO:0046836]; high-density lipoprotein particle remodeling [GO:0034375]; lipid metabolic process [GO:0006629]; lipid transport [GO:0006869]; phospholipid transport [GO:0015914]; positive regulation of cholesterol efflux [GO:0010875]; vitamin E biosynthetic process [GO:0010189]
LC-MS/MS	TPI1	FALSE	Protein	TRUE	TPI1	P60174	P60174	P60174	TPIS_HUMAN	Triosephosphate isomerase (TIM) (EC 5.3.1.1) (Methylglyoxal synthase) (EC 4.2.3.3) (Triose-phosphate isomerase)	249	3D-structure;Acetylation;Alternative promoter usage;Alternative splicing;Cytoplasm;Direct protein sequencing;Disease variant;Gluconeogenesis;Glycolysis;Hereditary hemolytic anemia;Isomerase;Isopeptide bond;Lyase;Methylation;Nitration;Phosphoprotein;Reference proteome;Ubl conjugation	canonical glycolysis [GO:0061621]; gluconeogenesis [GO:0006094]; glyceraldehyde-3-phosphate biosynthetic process [GO:0046166]; glycerol catabolic process [GO:0019563]; glycolytic process [GO:0006096]; methylglyoxal biosynthetic process [GO:0019242]
LC-MS/MS	MYL6	FALSE	Protein	TRUE	MYL6	P60660	P60660	P60660	MYL6_HUMAN	Myosin light polypeptide 6 (17 kDa myosin light chain) (LC17) (Myosin light chain 3) (MLC-3) (Myosin light chain alkali 3) (Myosin light chain A3) (Smooth muscle and nonmuscle myosin light chain alkali 6)	151	Acetylation;Alternative splicing;Direct protein sequencing;Motor protein;Muscle protein;Myosin;Phosphoprotein;Reference proteome;Repeat	muscle contraction [GO:0006936]; muscle filament sliding [GO:0030049]; skeletal muscle tissue development [GO:0007519]
LC-MS/MS	MYL6	FALSE	Protein	FALSE	MYL6B	P14649	P14649	P14649	MYL6B_HUMAN	Myosin light chain 6B (Myosin light chain 1 slow-twitch muscle A isoform) (MLC1sa) (Smooth muscle and nonmuscle myosin light chain alkali 6B)	208	3D-structure;Motor protein;Muscle protein;Myosin;Reference proteome;Repeat	muscle contraction [GO:0006936]; muscle filament sliding [GO:0030049]; skeletal muscle tissue development [GO:0007519]
LC-MS/MS	ACTB	FALSE	Protein	TRUE	ACTB	P60709	P60709	P60709	ACTB_HUMAN	Actin, cytoplasmic 1 (EC 3.6.4.-) (Beta-actin) [Cleaved into: Actin, cytoplasmic 1, N-terminally processed]	375	3D-structure;Acetylation;ATP-binding;Cytoplasm;Cytoskeleton;Deafness;Direct protein sequencing;Disease variant;Dystonia;Hydrolase;Intellectual disability;Isopeptide bond;Methylation;Nucleotide-binding;Nucleus;Oxidation;Reference proteome;Ubl conjugation	adherens junction assembly [GO:0034333]; apical protein localization [GO:0045176]; axonogenesis [GO:0007409]; cell motility [GO:0048870]; cellular response to cytochalasin B [GO:0072749]; chromatin remodeling [GO:0006338]; establishment or maintenance of cell polarity [GO:0007163]; maintenance of blood-brain barrier [GO:0035633]; morphogenesis of a polarized epithelium [GO:0001738]; negative regu…
LC-MS/MS	ACTB	FALSE	Protein	FALSE	POTEF	A5A3E0	A5A3E0	A5A3E0	POTEF_HUMAN	POTE ankyrin domain family member F (ANKRD26-like family C member 1B) (Chimeric POTE-actin protein)	1075	ANK repeat;Coiled coil;Cytoplasm;Reference proteome;Repeat	axonogenesis [GO:0007409]; cell motility [GO:0048870]; retina homeostasis [GO:0001895]
LC-MS/MS	ACTB	FALSE	Protein	FALSE	POTEKP	Q9BYX7	Q9BYX7	Q9BYX7	ACTBM_HUMAN	Putative beta-actin-like protein 3 (Kappa-actin) (POTE ankyrin domain family member K)	375	ATP-binding;Cytoplasm;Cytoskeleton;Methylation;Nucleotide-binding;Oxidation;Reference proteome	axonogenesis [GO:0007409]; cell motility [GO:0048870]
LC-MS/MS	ACTB	FALSE	Protein	FALSE	POTEI	P0CG38	P0CG38	P0CG38	POTEI_HUMAN	POTE ankyrin domain family member I	1075	ANK repeat;Coiled coil;Reference proteome;Repeat	axonogenesis [GO:0007409]; cell motility [GO:0048870]; retina homeostasis [GO:0001895]
LC-MS/MS	ACTB	FALSE	Protein	FALSE	POTEJ	P0CG39	P0CG39	P0CG39	POTEJ_HUMAN	POTE ankyrin domain family member J	1038	ANK repeat;Coiled coil;Reference proteome;Repeat	axonogenesis [GO:0007409]; cell motility [GO:0048870]; retina homeostasis [GO:0001895]
LC-MS/MS	LYZ	FALSE	Protein	TRUE	LYZ	P61626	P61626	P61626	LYSC_HUMAN	Lysozyme C (EC 3.2.1.17) (1,4-beta-N-acetylmuramidase C)	148	3D-structure;Amyloid;Amyloidosis;Antimicrobial;Bacteriolytic enzyme;Direct protein sequencing;Disease variant;Disulfide bond;Glycosidase;Hydrolase;Reference proteome;Secreted;Signal	antimicrobial humoral response [GO:0019730]; defense response to bacterium [GO:0042742]; defense response to Gram-negative bacterium [GO:0050829]; defense response to Gram-positive bacterium [GO:0050830]; inflammatory response [GO:0006954]; killing of cells of another organism [GO:0031640]; metabolic process [GO:0008152]; retina homeostasis [GO:0001895]
LC-MS/MS	B2M	FALSE	Protein	TRUE	B2M	P61769	P61769	P61769	B2MG_HUMAN	Beta-2-microglobulin [Cleaved into: Beta-2-microglobulin form pI 5.3]	119	3D-structure;Amyloid;Amyloidosis;Direct protein sequencing;Disease variant;Disulfide bond;Glycation;Glycoprotein;Immunity;Immunoglobulin domain;MHC I;Pyrrolidone carboxylic acid;Reference proteome;Secreted;Signal	amyloid fibril formation [GO:1990000]; antigen processing and presentation of endogenous peptide antigen via MHC class I [GO:0019885]; antigen processing and presentation of exogenous peptide antigen via MHC class II [GO:0019886]; antigen processing and presentation of exogenous protein antigen via MHC class Ib, TAP-dependent [GO:0002481]; cellular response to iron ion [GO:0071281]; cellular resp…
LC-MS/MS	H4C1	FALSE	Protein	TRUE	H4C1	P62805	P62805	P62805	H4_HUMAN	Histone H4	103	3D-structure;Acetylation;Chromosomal rearrangement;Chromosome;Citrullination;Direct protein sequencing;Disease variant;DNA-binding;Hydroxylation;Intellectual disability;Isopeptide bond;Methylation;Nucleosome core;Nucleus;Phosphoprotein;Reference proteome;Ubl conjugation	chromatin organization [GO:0006325]; negative regulation of megakaryocyte differentiation [GO:0045653]; nucleosome assembly [GO:0006334]; protein localization to CENP-A containing chromatin [GO:0061644]; telomere organization [GO:0032200]
LC-MS/MS	PPIA	FALSE	Protein	TRUE	PPIA	P62937	P62937	P62937	PPIA_HUMAN	Peptidyl-prolyl cis-trans isomerase A (PPIase A) (EC 5.2.1.8) (Cyclophilin A) (Cyclosporin A-binding protein) (Rotamase A) [Cleaved into: Peptidyl-prolyl cis-trans isomerase A, N-terminally processed]	165	3D-structure;Acetylation;Alternative splicing;Apoptosis;Cytoplasm;Direct protein sequencing;Glycoprotein;Host-virus interaction;Isomerase;Isopeptide bond;Nucleus;Phosphoprotein;Reference proteome;Rotamase;Secreted;Ubl conjugation	activation of protein kinase B activity [GO:0032148]; apoptotic process [GO:0006915]; cell adhesion molecule production [GO:0060352]; cellular response to oxidative stress [GO:0034599]; endothelial cell activation [GO:0042118]; leukocyte chemotaxis [GO:0030595]; lipid droplet organization [GO:0034389]; negative regulation of oxidative stress-induced intrinsic apoptotic signaling pathway [GO:19021…
LC-MS/MS	PPIA	FALSE	Protein	FALSE	PPIAL4C	A0A0B4J2A2	A0A0B4J2A2	A0A0B4J2A2	PAL4C_HUMAN	Peptidyl-prolyl cis-trans isomerase A-like 4C (PPIase A-like 4C) (EC 5.2.1.8)	164	Cytoplasm;Isomerase;Reference proteome;Rotamase	protein folding [GO:0006457]
LC-MS/MS	PPIA	FALSE	Protein	FALSE	PPIAL4A	Q9Y536	Q9Y536	Q9Y536	PAL4A_HUMAN	Peptidyl-prolyl cis-trans isomerase A-like 4A (PPIase A-like 4A) (EC 5.2.1.8) (Chromosome one-amplified sequence 2) (COAS-2) (Cyclophilin homolog overexpressed in liver cancer)	164	Cytoplasm;Isomerase;Reference proteome;Rotamase	protein folding [GO:0006457]
LC-MS/MS	RPS27A;UB[A52,C,B]	FALSE	Protein	TRUE	UBA52	P62987	P62987	P62987	RL40_HUMAN	Ubiquitin-ribosomal protein eL40 fusion protein (CEP52) (Ubiquitin A-52 residue ribosomal protein fusion product 1) [Cleaved into: Ubiquitin; Large ribosomal subunit protein eL40 (60S ribosomal protein L40)]	128	3D-structure;ADP-ribosylation;Cytoplasm;Direct protein sequencing;Isopeptide bond;Methylation;Nucleus;Phosphoprotein;Reference proteome;Ribonucleoprotein;Ribosomal protein;Ubl conjugation	cytoplasmic translation [GO:0002181]; modification-dependent protein catabolic process [GO:0019941]; protein modification process [GO:0036211]; protein ubiquitination [GO:0016567]
LC-MS/MS	RPS27A;UB[A52,C,B]	FALSE	Protein	FALSE	RPS27A	P62979	P62979	P62979	RS27A_HUMAN	Ubiquitin-ribosomal protein eS31 fusion protein (Ubiquitin carboxyl extension protein 80) [Cleaved into: Ubiquitin; Small ribosomal subunit protein eS31 (40S ribosomal protein S27a)]	156	3D-structure;Acetylation;ADP-ribosylation;Cytoplasm;Direct protein sequencing;Isopeptide bond;Metal-binding;Nucleus;Phosphoprotein;Reference proteome;Ribonucleoprotein;Ribosomal protein;Ubl conjugation;Zinc;Zinc-finger	cytoplasmic translation [GO:0002181]; modification-dependent protein catabolic process [GO:0019941]; protein ubiquitination [GO:0016567]; translation [GO:0006412]
LC-MS/MS	RPS27A;UB[A52,C,B]	FALSE	Protein	FALSE	UBB	P0CG47	P0CG47	P0CG47	UBB_HUMAN	Polyubiquitin-B [Cleaved into: Ubiquitin]	229	3D-structure;ADP-ribosylation;Cytoplasm;Direct protein sequencing;Isopeptide bond;Membrane;Mitochondrion;Mitochondrion outer membrane;Nucleus;Phosphoprotein;Reference proteome;Repeat;Ubl conjugation	energy homeostasis [GO:0097009]; fat pad development [GO:0060613]; female gonad development [GO:0008585]; female meiosis I [GO:0007144]; hypothalamus gonadotrophin-releasing hormone neuron development [GO:0021888]; male meiosis I [GO:0007141]; mitochondrion transport along microtubule [GO:0047497]; modification-dependent protein catabolic process [GO:0019941]; neuron projection morphogenesis [GO:…
LC-MS/MS	RPS27A;UB[A52,C,B]	FALSE	Protein	FALSE	UBC	P0CG48	P0CG48	P0CG48	UBC_HUMAN	Polyubiquitin-C [Cleaved into: Ubiquitin]	685	3D-structure;ADP-ribosylation;Cytoplasm;Direct protein sequencing;Isopeptide bond;Membrane;Mitochondrion;Mitochondrion outer membrane;Nucleus;Phosphoprotein;Reference proteome;Repeat;Ubl conjugation	modification-dependent protein catabolic process [GO:0019941]; protein ubiquitination [GO:0016567]
LC-MS/MS	YWHAZ	FALSE	Protein	TRUE	YWHAZ	P63104	P63104	P63104	1433Z_HUMAN	14-3-3 protein zeta/delta (Protein kinase C inhibitor protein 1) (KCIP-1)	245	3D-structure;Acetylation;Alternative splicing;Cytoplasm;Direct protein sequencing;Disease variant;Host-virus interaction;Phosphoprotein;Reference proteome	cellular response to glucose starvation [GO:0042149]; establishment of Golgi localization [GO:0051683]; Golgi reassembly [GO:0090168]; negative regulation of apoptotic process [GO:0043066]; negative regulation of innate immune response [GO:0045824]; negative regulation of protein localization to nucleus [GO:1900181]; negative regulation of TORC1 signaling [GO:1904262]; negative regulation of tran…
LC-MS/MS	TPM[1-4]	FALSE	Protein	TRUE	TPM4	P67936	P67936	P67936	TPM4_HUMAN	Tropomyosin alpha-4 chain (TM30p1) (Tropomyosin-4)	248	Acetylation;Actin-binding;Alternative splicing;Calcium;Coiled coil;Cytoplasm;Cytoskeleton;Direct protein sequencing;Metal-binding;Muscle protein;Phosphoprotein;Reference proteome	actin filament organization [GO:0007015]; muscle contraction [GO:0006936]; osteoblast differentiation [GO:0001649]
LC-MS/MS	TPM[1-4]	FALSE	Protein	FALSE	TPM1	P09493	P09493	P09493	TPM1_HUMAN	Tropomyosin alpha-1 chain (Alpha-tropomyosin) (Tropomyosin-1)	284	3D-structure;Acetylation;Actin-binding;Alternative splicing;Cardiomyopathy;Coiled coil;Cytoplasm;Cytoskeleton;Direct protein sequencing;Disease variant;Muscle protein;Phosphoprotein;Reference proteome	actin filament organization [GO:0007015]; cardiac muscle contraction [GO:0060048]; cellular response to reactive oxygen species [GO:0034614]; cytoskeleton organization [GO:0007010]; muscle filament sliding [GO:0030049]; negative regulation of cell migration [GO:0030336]; negative regulation of vascular associated smooth muscle cell migration [GO:1904753]; negative regulation of vascular associate…
LC-MS/MS	TPM[1-4]	FALSE	Protein	FALSE	TPM2	P07951	P07951	P07951	TPM2_HUMAN	Tropomyosin beta chain (Beta-tropomyosin) (Tropomyosin-2)	284	Acetylation;Actin-binding;Alternative splicing;Coiled coil;Cytoplasm;Cytoskeleton;Direct protein sequencing;Disease variant;Muscle protein;Nemaline myopathy;Phosphoprotein;Reference proteome	actin filament organization [GO:0007015]; muscle contraction [GO:0006936]; regulation of ATP-dependent activity [GO:0043462]
LC-MS/MS	TPM[1-4]	FALSE	Protein	FALSE	TPM3	P06753	P06753	P06753	TPM3_HUMAN	Tropomyosin alpha-3 chain (Gamma-tropomyosin) (Tropomyosin-3) (Tropomyosin-5) (hTM5)	285	3D-structure;Acetylation;Actin-binding;Alternative splicing;Chromosomal rearrangement;Coiled coil;Cytoplasm;Cytoskeleton;Direct protein sequencing;Disease variant;Muscle protein;Nemaline myopathy;Phosphoprotein;Proto-oncogene;Reference proteome	actin filament organization [GO:0007015]; muscle contraction [GO:0006936]
LC-MS/MS	ACT[A1-2,C1,G2]	FALSE	Protein	TRUE	ACTA1	P68133	P68133	P68133	ACTS_HUMAN	Actin, alpha skeletal muscle (EC 3.6.4.-) (Alpha-actin-1) [Cleaved into: Actin, alpha skeletal muscle, intermediate form]	377	3D-structure;Acetylation;ATP-binding;Cytoplasm;Cytoskeleton;Disease variant;Hydrolase;Isopeptide bond;Methylation;Muscle protein;Nemaline myopathy;Nucleotide-binding;Oxidation;Reference proteome	cellular response to organonitrogen compound [GO:0071417]; mesenchyme migration [GO:0090131]; muscle contraction [GO:0006936]; positive regulation of gene expression [GO:0010628]; response to extracellular stimulus [GO:0009991]; response to mechanical stimulus [GO:0009612]; response to steroid hormone [GO:0048545]; skeletal muscle fiber adaptation [GO:0043503]; skeletal muscle fiber development […
LC-MS/MS	ACT[A1-2,C1,G2]	FALSE	Protein	FALSE	ACTC1	P68032	P68032	P68032	ACTC_HUMAN	Actin, alpha cardiac muscle 1 (EC 3.6.4.-) (Alpha-cardiac actin) [Cleaved into: Actin, alpha cardiac muscle 1, intermediate form]	377	3D-structure;Acetylation;ATP-binding;Atrial septal defect;Cardiomyopathy;Cytoplasm;Cytoskeleton;Disease variant;Hydrolase;Isopeptide bond;Methylation;Muscle protein;Nucleotide-binding;Oxidation;Reference proteome	actin filament organization [GO:0007015]; actin filament-based movement [GO:0030048]; actin-myosin filament sliding [GO:0033275]; actomyosin structure organization [GO:0031032]; cardiac muscle tissue morphogenesis [GO:0055008]; cardiac myofibril assembly [GO:0055003]; heart contraction [GO:0060047]; mesenchyme migration [GO:0090131]; negative regulation of apoptotic process [GO:0043066]; positive…
LC-MS/MS	ACT[A1-2,C1,G2]	FALSE	Protein	FALSE	ACTG2	P63267	P63267	P63267	ACTH_HUMAN	Actin, gamma-enteric smooth muscle (EC 3.6.4.-) (Alpha-actin-3) (Gamma-2-actin) (Smooth muscle gamma-actin) [Cleaved into: Actin, gamma-enteric smooth muscle, intermediate form]	376	3D-structure;Acetylation;Alternative splicing;ATP-binding;Cytoplasm;Cytoskeleton;Disease variant;Hydrolase;Isopeptide bond;Methylation;Muscle protein;Nucleotide-binding;Oxidation;Reference proteome	mesenchyme migration [GO:0090131]; positive regulation of gene expression [GO:0010628]
LC-MS/MS	ACT[A1-2,C1,G2]	FALSE	Protein	FALSE	ACTA2	P62736	P62736	P62736	ACTA_HUMAN	Actin, aortic smooth muscle (EC 3.6.4.-) (Alpha-actin-2) (Cell growth-inhibiting gene 46 protein) [Cleaved into: Actin, aortic smooth muscle, intermediate form]	377	Acetylation;Aortic aneurysm;ATP-binding;Cytoplasm;Cytoskeleton;Disease variant;Hydrolase;Isopeptide bond;Methylation;Muscle protein;Nucleotide-binding;Oxidation;Reference proteome	cellular response to transforming growth factor beta stimulus [GO:0071560]; glomerular mesangial cell development [GO:0072144]; juxtaglomerular apparatus development [GO:0072051]; mesenchyme migration [GO:0090131]; positive regulation of ERK1 and ERK2 cascade [GO:0070374]; positive regulation of gene expression [GO:0010628]; positive regulation of hepatic stellate cell activation [GO:2000491]; po…
LC-MS/MS	TUBA[1A-C,3E]	FALSE	Protein	TRUE	TUBA1B	P68363	P68363	P68363	TBA1B_HUMAN	Tubulin alpha-1B chain (EC 3.6.5.-) (Alpha-tubulin ubiquitous) (Tubulin K-alpha-1) (Tubulin alpha-ubiquitous chain) [Cleaved into: Detyrosinated tubulin alpha-1B chain]	451	3D-structure;Acetylation;Alternative splicing;Cytoplasm;Cytoskeleton;Direct protein sequencing;GTP-binding;Hydrolase;Isopeptide bond;Methylation;Microtubule;Nitration;Nucleotide-binding;Phosphoprotein;Reference proteome;Ubl conjugation	cell division [GO:0051301]; cellular response to interleukin-4 [GO:0071353]; cytoskeleton-dependent intracellular transport [GO:0030705]; microtubule cytoskeleton organization [GO:0000226]; microtubule-based process [GO:0007017]; mitotic cell cycle [GO:0000278]
LC-MS/MS	TUBA[1A-C,3E]	FALSE	Protein	FALSE	TUBA1C	Q9BQE3	Q9BQE3	Q9BQE3	TBA1C_HUMAN	Tubulin alpha-1C chain (EC 3.6.5.-) (Alpha-tubulin 6) (Tubulin alpha-6 chain) [Cleaved into: Detyrosinated tubulin alpha-1C chain]	449	Acetylation;Cytoplasm;Cytoskeleton;Direct protein sequencing;GTP-binding;Hydrolase;Magnesium;Metal-binding;Methylation;Microtubule;Nitration;Nucleotide-binding;Phosphoprotein;Reference proteome	cell division [GO:0051301]; cytoskeleton-dependent intracellular transport [GO:0030705]; microtubule cytoskeleton organization [GO:0000226]; microtubule-based process [GO:0007017]; mitotic cell cycle [GO:0000278]
LC-MS/MS	TUBA[1A-C,3E]	FALSE	Protein	FALSE	TUBA3E	Q6PEY2	Q6PEY2	Q6PEY2	TBA3E_HUMAN	Tubulin alpha-3E chain (EC 3.6.5.-) (Alpha-tubulin 3E) [Cleaved into: Detyrosinated tubulin alpha-3E chain]	450	Acetylation;Cytoplasm;Cytoskeleton;GTP-binding;Hydrolase;Magnesium;Metal-binding;Methylation;Microtubule;Nitration;Nucleotide-binding;Phosphoprotein;Reference proteome	microtubule cytoskeleton organization [GO:0000226]; mitotic cell cycle [GO:0000278]
LC-MS/MS	TUBA[1A-C,3E]	FALSE	Protein	FALSE	TUBA3C	P0DPH7	P0DPH7	P0DPH7	TBA3C_HUMAN	Tubulin alpha-3C chain (EC 3.6.5.-) (Alpha-tubulin 2) (Alpha-tubulin 3C) (Tubulin alpha-2 chain) [Cleaved into: Detyrosinated tubulin alpha-3C chain]	450	Acetylation;Alternative splicing;Cytoplasm;Cytoskeleton;GTP-binding;Hydrolase;Isopeptide bond;Magnesium;Metal-binding;Methylation;Microtubule;Nitration;Nucleotide-binding;Phosphoprotein;Reference proteome	male germ-line stem cell population maintenance [GO:0036098]; microtubule cytoskeleton organization [GO:0000226]; mitotic cell cycle [GO:0000278]
LC-MS/MS	TUBA[1A-C,3E]	FALSE	Protein	FALSE	TUBA3D	P0DPH8	P0DPH8	P0DPH8	TBA3D_HUMAN	Tubulin alpha-3D chain (EC 3.6.5.-) (Alpha-tubulin 3D) [Cleaved into: Detyrosinated tubulin alpha-3D chain]	450	Acetylation;Cytoplasm;Cytoskeleton;Disease variant;GTP-binding;Hydrolase;Isopeptide bond;Magnesium;Metal-binding;Methylation;Microtubule;Nitration;Nucleotide-binding;Phosphoprotein;Reference proteome	microtubule cytoskeleton organization [GO:0000226]; mitotic cell cycle [GO:0000278]
LC-MS/MS	TUBA[1A-C,3E]	FALSE	Protein	FALSE	TUBA1A	Q71U36	Q71U36	Q71U36	TBA1A_HUMAN	Tubulin alpha-1A chain (EC 3.6.5.-) (Alpha-tubulin 3) (Tubulin B-alpha-1) (Tubulin alpha-3 chain) [Cleaved into: Detyrosinated tubulin alpha-1A chain]	451	3D-structure;Acetylation;Alternative splicing;Cytoplasm;Cytoskeleton;Direct protein sequencing;Disease variant;GTP-binding;Hydrolase;Isopeptide bond;Lissencephaly;Magnesium;Metal-binding;Methylation;Microtubule;Nitration;Nucleotide-binding;Phosphoprotein;Reference proteome	adult locomotory behavior [GO:0008344]; cell division [GO:0051301]; cellular response to calcium ion [GO:0071277]; centrosome cycle [GO:0007098]; cerebellar cortex morphogenesis [GO:0021696]; cerebral cortex development [GO:0021987]; cytoskeleton-dependent intracellular transport [GO:0030705]; dentate gyrus development [GO:0021542]; forebrain morphogenesis [GO:0048853]; gene expression [GO:001046…
LC-MS/MS	TUBA4A	FALSE	Protein	TRUE	TUBA4A	P68366	P68366	P68366	TBA4A_HUMAN	Tubulin alpha-4A chain (EC 3.6.5.-) (Alpha-tubulin 1) (Testis-specific alpha-tubulin) (Tubulin H2-alpha) (Tubulin alpha-1 chain)	448	Acetylation;Alternative splicing;Amyotrophic lateral sclerosis;Cytoplasm;Cytoskeleton;Direct protein sequencing;GTP-binding;Hydrolase;Magnesium;Metal-binding;Methylation;Microtubule;Neurodegeneration;Nitration;Nucleotide-binding;Phosphoprotein;Reference proteome	microtubule cytoskeleton organization [GO:0000226]; mitotic cell cycle [GO:0000278]
LC-MS/MS	HBB	FALSE	Protein	TRUE	HBB	P68871	P68871	P68871	HBB_HUMAN	Hemoglobin subunit beta (Beta-globin) (Hemoglobin beta chain) [Cleaved into: LVV-hemorphin-7; Spinorphin]	147	3D-structure;Acetylation;Congenital dyserythropoietic anemia;Direct protein sequencing;Disease variant;Glycation;Glycoprotein;Heme;Hereditary hemolytic anemia;Hypotensive agent;Iron;Metal-binding;Oxygen transport;Phosphoprotein;Pyruvate;Reference proteome;S-nitrosylation;Transport;Vasoactive	blood vessel diameter maintenance [GO:0097746]; carbon dioxide transport [GO:0015670]; cellular oxidant detoxification [GO:0098869]; hydrogen peroxide catabolic process [GO:0042744]; nitric oxide transport [GO:0030185]; oxygen transport [GO:0015671]; platelet aggregation [GO:0070527]; positive regulation of nitric oxide biosynthetic process [GO:0045429]; regulation of blood pressure [GO:0008217];…
LC-MS/MS	HBG[1,2]	FALSE	Protein	TRUE	HBG2	P69892	P69892	P69892	HBG2_HUMAN	Hemoglobin subunit gamma-2 (Gamma-2-globin) (Hb F Ggamma) (Hemoglobin gamma-2 chain) (Hemoglobin gamma-G chain)	147	3D-structure;Acetylation;Direct protein sequencing;Disease variant;Heme;Iron;Metal-binding;Oxygen transport;Phosphoprotein;Reference proteome;S-nitrosylation;Transport	carbon dioxide transport [GO:0015670]; cellular oxidant detoxification [GO:0098869]; hydrogen peroxide catabolic process [GO:0042744]; oxygen transport [GO:0015671]
LC-MS/MS	HBG[1,2]	FALSE	Protein	FALSE	HBG1	P69891	P69891	P69891	HBG1_HUMAN	Hemoglobin subunit gamma-1 (Gamma-1-globin) (Hb F Agamma) (Hemoglobin gamma-1 chain) (Hemoglobin gamma-A chain)	147	3D-structure;Acetylation;Direct protein sequencing;Disease variant;Heme;Iron;Metal-binding;Oxygen transport;Phosphoprotein;Reference proteome;S-nitrosylation;Transport	carbon dioxide transport [GO:0015670]; cellular oxidant detoxification [GO:0098869]; hydrogen peroxide catabolic process [GO:0042744]; oxygen transport [GO:0015671]
LC-MS/MS		FALSE	Protein	TRUE	HBA1;	P69905	P69905	P69905	HBA_HUMAN	Hemoglobin subunit alpha (Alpha-globin) (Hemoglobin alpha chain) [Cleaved into: Hemopressin]	142	3D-structure;Acetylation;Direct protein sequencing;Disease variant;Glycation;Glycoprotein;Heme;Hereditary hemolytic anemia;Iron;Metal-binding;Oxygen transport;Phosphoprotein;Reference proteome;Transport	carbon dioxide transport [GO:0015670]; cellular oxidant detoxification [GO:0098869]; hydrogen peroxide catabolic process [GO:0042744]; nitric oxide transport [GO:0030185]; oxygen transport [GO:0015671]; response to hydrogen peroxide [GO:0042542]
LC-MS/MS		FALSE	Protein	FALSE	HBZ	P02008	P02008	P02008	HBAZ_HUMAN	Hemoglobin subunit zeta (HBAZ) (Hemoglobin zeta chain) (Zeta-globin)	142	3D-structure;Acetylation;Direct protein sequencing;Heme;Iron;Metal-binding;Oxygen transport;Phosphoprotein;Reference proteome;Transport	carbon dioxide transport [GO:0015670]; cellular oxidant detoxification [GO:0098869]; hydrogen peroxide catabolic process [GO:0042744]; oxygen transport [GO:0015671]
LC-MS/MS	GPLD1	FALSE	Protein	TRUE	GPLD1	P80108	P80108	P80108	PHLD_HUMAN	Phosphatidylinositol-glycan-specific phospholipase D (PI-G PLD) (EC 3.1.4.50) (Glycoprotein phospholipase D) (Glycosyl-phosphatidylinositol-specific phospholipase D) (GPI-PLD) (GPI-specific phospholipase D)	840	Alternative splicing;Direct protein sequencing;Glycoprotein;Hydrolase;Lipid metabolism;Reference proteome;Repeat;Secreted;Signal	cell migration involved in sprouting angiogenesis [GO:0002042]; cellular response to calcium ion [GO:0071277]; cellular response to cholesterol [GO:0071397]; cellular response to insulin stimulus [GO:0032869]; cellular response to pH [GO:0071467]; cellular response to triglyceride [GO:0071401]; cellular response to xenobiotic stimulus [GO:0071466]; chondrocyte differentiation [GO:0002062]; comple…
LC-MS/MS	IGLV3-21	FALSE	Ig peptide	TRUE	IGLV3-21	P80748	P80748	P80748	LV321_HUMAN	Immunoglobulin lambda variable 3-21 (Ig lambda chain V-III region LOI) (Ig lambda chain V-V region DEL) (Ig lambda chain V-VII region MOT)	117	Adaptive immunity;Cell membrane;Direct protein sequencing;Disulfide bond;Immunity;Immunoglobulin;Immunoglobulin domain;Membrane;Reference proteome;Secreted;Signal	adaptive immune response [GO:0002250]; immune response [GO:0006955]
LC-MS/MS	HNRNPU	FALSE	Protein	TRUE	HNRNPU	Q00839	Q00839	Q00839	HNRPU_HUMAN	Heterogeneous nuclear ribonucleoprotein U (hnRNP U) (GRIP120) (Nuclear p120 ribonucleoprotein) (Scaffold-attachment factor A) (SAF-A) (p120) (pp120)	825	3D-structure;Acetylation;Activator;ADP-ribosylation;Alternative splicing;ATP-binding;Biological rhythms;Cell cycle;Cell division;Centromere;Chromatin regulator;Chromosome;Citrullination;Cytoplasm;Cytoskeleton;Developmental protein;Differentiation;Direct protein sequencing;Disease variant;DNA-binding;Epilepsy;Host-virus interaction;Isopeptide bond;Kinetochore;Methylation;Mitosis;mRNA processing;mR…	adaptive thermogenesis [GO:1990845]; cardiac muscle cell development [GO:0055013]; cell cycle [GO:0007049]; cell division [GO:0051301]; cellular response to glucocorticoid stimulus [GO:0071385]; cellular response to leukemia inhibitory factor [GO:1990830]; chromatin organization [GO:0006325]; circadian regulation of gene expression [GO:0032922]; CRD-mediated mRNA stabilization [GO:0070934]; dendr…
LC-MS/MS	H1-[6,1-3]	FALSE	Protein	TRUE	H1-1	Q02539	Q02539	Q02539	H11_HUMAN	Histone H1.1 (Histone H1a)	215	Acetylation;Chromosome;Citrullination;DNA-binding;Hydroxylation;Nucleus;Phosphoprotein;Reference proteome	chromosome condensation [GO:0030261]; negative regulation of DNA recombination [GO:0045910]; nucleosome assembly [GO:0006334]; positive regulation of receptor-mediated endocytosis [GO:0048260]; spermatogenesis [GO:0007283]
LC-MS/MS	H1-[6,1-3]	FALSE	Protein	FALSE	H1-6	P22492	P22492	P22492	H1T_HUMAN	Histone H1t (Testicular H1 histone)	207	Chromosome;Citrullination;Developmental protein;Differentiation;DNA-binding;Nucleus;Phosphoprotein;Reference proteome;Spermatogenesis	cell differentiation [GO:0030154]; chromosome condensation [GO:0030261]; negative regulation of DNA recombination [GO:0045910]; nucleosome assembly [GO:0006334]; spermatogenesis [GO:0007283]
LC-MS/MS	H1-[6,1-3]	FALSE	Protein	FALSE	H1-2	P16403	P16403	P16403	H12_HUMAN	Histone H1.2 (Histone H1c) (Histone H1d) (Histone H1s-1)	213	3D-structure;Acetylation;ADP-ribosylation;Chromosome;Citrullination;Direct protein sequencing;DNA-binding;Hydroxylation;Methylation;Nucleus;Phosphoprotein;Reference proteome	chromosome condensation [GO:0030261]; negative regulation of DNA recombination [GO:0045910]; negative regulation of transcription by RNA polymerase II [GO:0000122]; nucleosome assembly [GO:0006334]
LC-MS/MS	H1-[6,1-3]	FALSE	Protein	FALSE	H1-3	P16402	P16402	P16402	H13_HUMAN	Histone H1.3 (Histone H1c) (Histone H1s-2)	221	3D-structure;Acetylation;Chromosome;Citrullination;Direct protein sequencing;DNA-binding;Hydroxylation;Nucleus;Phosphoprotein;Reference proteome	chromosome condensation [GO:0030261]; negative regulation of DNA recombination [GO:0045910]; negative regulation of transcription by RNA polymerase II [GO:0000122]; nucleosome assembly [GO:0006334]
LC-MS/MS	CFHR3	FALSE	Protein	TRUE	CFHR3	Q02985	Q02985	Q02985	FHR3_HUMAN	Complement factor H-related protein 3 (FHR-3) (DOWN16) (H factor-like protein 3)	330	Alternative splicing;Disulfide bond;Glycoprotein;Hemolytic uremic syndrome;Reference proteome;Repeat;Secreted;Signal;Sushi	complement activation [GO:0006956]
LC-MS/MS	CFHR1	FALSE	Protein	TRUE	CFHR1	Q03591	Q03591	Q03591	FHR1_HUMAN	Complement factor H-related protein 1 (FHR-1) (H factor-like protein 1) (FHL-1) (H-factor-like 1) (H36)	330	3D-structure;Disulfide bond;Glycoprotein;Hemolytic uremic syndrome;Reference proteome;Repeat;Secreted;Signal;Sushi	complement activation [GO:0006956]; cytolysis by host of symbiont cells [GO:0051838]; negative regulation of protein binding [GO:0032091]
LC-MS/MS	HGFAC	FALSE	Protein	TRUE	HGFAC	Q04756	Q04756	Q04756	HGFA_HUMAN	Hepatocyte growth factor activator (HGF activator) (HGFA) (EC 3.4.21.-) [Cleaved into: Hepatocyte growth factor activator short chain; Hepatocyte growth factor activator long chain]	655	3D-structure;Direct protein sequencing;Disulfide bond;EGF-like domain;Glycoprotein;Hydrolase;Kringle;Protease;Reference proteome;Repeat;Secreted;Serine protease;Signal;Zymogen	blood coagulation [GO:0007596]; proteolysis [GO:0006508]; zymogen activation [GO:0031638]
LC-MS/MS	ITIH3	FALSE	Protein	TRUE	ITIH3	Q06033	Q06033	Q06033	ITIH3_HUMAN	Inter-alpha-trypsin inhibitor heavy chain H3 (ITI heavy chain H3) (ITI-HC3) (Inter-alpha-inhibitor heavy chain 3) (Serum-derived hyaluronan-associated protein) (SHAP)	890	Alternative splicing;Direct protein sequencing;Glycoprotein;Protease inhibitor;Proteoglycan;Reference proteome;Secreted;Serine protease inhibitor;Signal	hyaluronan metabolic process [GO:0030212]
LC-MS/MS	PTPN11	FALSE	Protein	TRUE	PTPN11	Q06124	Q06124	Q06124	PTN11_HUMAN	Tyrosine-protein phosphatase non-receptor type 11 (EC 3.1.3.48) (Protein-tyrosine phosphatase 1D) (PTP-1D) (Protein-tyrosine phosphatase 2C) (PTP-2C) (SH-PTP2) (SHP-2) (Shp2) (SH-PTP3)	593	3D-structure;Acetylation;Alternative splicing;Cytoplasm;Deafness;Disease variant;Hydrolase;Nucleus;Phosphoprotein;Protein phosphatase;Reference proteome;Repeat;SH2 domain	atrioventricular canal development [GO:0036302]; axonogenesis [GO:0007409]; Bergmann glial cell differentiation [GO:0060020]; brain development [GO:0007420]; cellular response to epidermal growth factor stimulus [GO:0071364]; cerebellar cortex formation [GO:0021697]; cytokine-mediated signaling pathway [GO:0019221]; DNA damage checkpoint signaling [GO:0000077]; ephrin receptor signaling pathway […
LC-MS/MS	LGALS3BP	FALSE	Protein	TRUE	LGALS3BP	Q08380	Q08380	Q08380	LG3BP_HUMAN	Galectin-3-binding protein (Basement membrane autoantigen p105) (Lectin galactoside-binding soluble 3-binding protein) (Mac-2-binding protein) (MAC2BP) (Mac-2 BP) (Tumor-associated antigen 90K)	585	3D-structure;Cell adhesion;Direct protein sequencing;Disulfide bond;Extracellular matrix;Glycoprotein;Reference proteome;Secreted;Signal	cell adhesion [GO:0007155]; cellular defense response [GO:0006968]; signal transduction [GO:0007165]
LC-MS/MS	EFEMP1	FALSE	Protein	TRUE	EFEMP1	Q12805	Q12805	Q12805	FBLN3_HUMAN	EGF-containing fibulin-like extracellular matrix protein 1 (Extracellular protein S1-5) (Fibrillin-like protein) (Fibulin-3) (FIBL-3)	493	Alternative splicing;Calcium;Disease variant;Disulfide bond;EGF-like domain;Extracellular matrix;Glycoprotein;Growth factor;Reference proteome;Repeat;Secreted;Signal	camera-type eye development [GO:0043010]; embryonic eye morphogenesis [GO:0048048]; epidermal growth factor receptor signaling pathway [GO:0007173]; negative regulation of chondrocyte differentiation [GO:0032331]; peptidyl-tyrosine phosphorylation [GO:0018108]; post-embryonic eye morphogenesis [GO:0048050]; regulation of DNA-templated transcription [GO:0006355]; visual perception [GO:0007601]
LC-MS/MS	SPP2	FALSE	Protein	TRUE	SPP2	Q13103	Q13103	Q13103	SPP24_HUMAN	Secreted phosphoprotein 24 (Spp-24) (Secreted phosphoprotein 2)	211	Disulfide bond;Phosphoprotein;Reference proteome;Secreted;Signal	bone remodeling [GO:0046849]; skeletal system development [GO:0001501]
LC-MS/MS	PPFIA1	FALSE	Protein	TRUE	PPFIA1	Q13136	Q13136	Q13136	LIPA1_HUMAN	Liprin-alpha-1 (LAR-interacting protein 1) (LIP-1) (Protein tyrosine phosphatase receptor type f polypeptide-interacting protein alpha-1) (PTPRF-interacting protein alpha-1)	1202	3D-structure;Alternative splicing;Coiled coil;Cytoplasm;Phosphoprotein;Reference proteome;Repeat	cell-matrix adhesion [GO:0007160]; negative regulation of protein localization to plasma membrane [GO:1903077]; negative regulation of stress fiber assembly [GO:0051497]; regulation of postsynaptic membrane neurotransmitter receptor levels [GO:0099072]; signal transduction [GO:0007165]; synapse organization [GO:0050808]
LC-MS/MS	MMRN1	FALSE	Protein	TRUE	MMRN1	Q13201	Q13201	Q13201	MMRN1_HUMAN	Multimerin-1 (EMILIN-4) (Elastin microfibril interface located protein 4) (Elastin microfibril interfacer 4) (Endothelial cell multimerin) [Cleaved into: Platelet glycoprotein Ia*; 155 kDa platelet multimerin (p-155) (p155)]	1228	Alternative splicing;Coiled coil;Direct protein sequencing;Disulfide bond;EGF-like domain;Glycoprotein;Reference proteome;Secreted;Signal	blood coagulation [GO:0007596]; cell adhesion [GO:0007155]; cell adhesion mediated by integrin [GO:0033627]; negative regulation of wound healing [GO:0061045]; positive regulation of platelet aggregation [GO:1901731]
LC-MS/MS	APOF	FALSE	Protein	TRUE	APOF	Q13790	Q13790	Q13790	APOF_HUMAN	Apolipoprotein F (Apo-F) (Lipid transfer inhibitor protein) (LTIP)	326	Cholesterol metabolism;Direct protein sequencing;Glycoprotein;HDL;LDL;Lipid metabolism;Lipid transport;Phosphoprotein;Reference proteome;Secreted;Signal;Steroid metabolism;Sterol metabolism;Transport	cholesterol metabolic process [GO:0008203]; lipid metabolic process [GO:0006629]; lipid transport [GO:0006869]
LC-MS/MS	HABP2	FALSE	Protein	TRUE	HABP2	Q14520	Q14520	Q14520	HABP2_HUMAN	Hyaluronan-binding protein 2 (EC 3.4.21.-) (Factor VII-activating protease) (Factor seven-activating protease) (FSAP) (Hepatocyte growth factor activator-like protein) (Plasma hyaluronan-binding protein) [Cleaved into: Hyaluronan-binding protein 2 50 kDa heavy chain; Hyaluronan-binding protein 2 50 kDa heavy chain alternate form; Hyaluronan-binding protein 2 27 kDa light chain; Hyaluronan-binding…	560	Alternative splicing;Cleavage on pair of basic residues;Direct protein sequencing;Disulfide bond;EGF-like domain;Glycoprotein;Hydrolase;Kringle;Protease;Reference proteome;Repeat;Secreted;Serine protease;Signal	cell adhesion [GO:0007155]; proteolysis [GO:0006508]
LC-MS/MS	ITIH4	FALSE	Protein	TRUE	ITIH4	Q14624	Q14624	Q14624	ITIH4_HUMAN	Inter-alpha-trypsin inhibitor heavy chain H4 (ITI heavy chain H4) (ITI-HC4) (Inter-alpha-inhibitor heavy chain 4) (Inter-alpha-trypsin inhibitor family heavy chain-related protein) (IHRP) (Plasma kallikrein sensitive glycoprotein 120) (Gp120) (PK-120) [Cleaved into: 70 kDa inter-alpha-trypsin inhibitor heavy chain H4; 35 kDa inter-alpha-trypsin inhibitor heavy chain H4]	930	Acute phase;Alternative splicing;Direct protein sequencing;Disulfide bond;Glycoprotein;Protease inhibitor;Reference proteome;Secreted;Serine protease inhibitor;Signal	acute-phase response [GO:0006953]; hyaluronan metabolic process [GO:0030212]; response to cytokine [GO:0034097]
LC-MS/MS	MDC1	FALSE	Protein	TRUE	MDC1	Q14676	Q14676	Q14676	MDC1_HUMAN	Mediator of DNA damage checkpoint protein 1 (Nuclear factor with BRCT domains 1)	2089	3D-structure;Acetylation;Alternative splicing;Cell cycle;Chromosome;DNA damage;DNA repair;Isopeptide bond;Methylation;Nucleus;Phosphoprotein;Reference proteome;Repeat;Ubl conjugation	DNA repair [GO:0006281]; mitotic intra-S DNA damage checkpoint signaling [GO:0031573]; positive regulation of transcription initiation by RNA polymerase II [GO:0060261]
LC-MS/MS	PCOLCE	FALSE	Protein	TRUE	PCOLCE	Q15113	Q15113	Q15113	PCOC1_HUMAN	Procollagen C-endopeptidase enhancer 1 (Procollagen COOH-terminal proteinase enhancer 1) (PCPE-1) (Procollagen C-proteinase enhancer 1) (Type 1 procollagen C-proteinase enhancer protein) (Type I procollagen COOH-terminal proteinase enhancer)	449	3D-structure;Direct protein sequencing;Disulfide bond;Glycoprotein;Phosphoprotein;Reference proteome;Repeat;Secreted;Signal	collagen biosynthetic process [GO:0032964]; proteolysis [GO:0006508]
LC-MS/MS	ADIPOQ	FALSE	Protein	TRUE	ADIPOQ	Q15848	Q15848	Q15848	ADIPO_HUMAN	Adiponectin (30 kDa adipocyte complement-related protein) (Adipocyte complement-related 30 kDa protein) (ACRP30) (Adipocyte, C1q and collagen domain-containing protein) (Adipose most abundant gene transcript 1 protein) (apM-1) (Gelatin-binding protein)	244	3D-structure;Collagen;Diabetes mellitus;Direct protein sequencing;Disease variant;Disulfide bond;Glycoprotein;Hormone;Hydroxylation;Obesity;Pharmaceutical;Reference proteome;Repeat;Secreted;Signal	brown fat cell differentiation [GO:0050873]; cellular response to cAMP [GO:0071320]; cellular response to epinephrine stimulus [GO:0071872]; cellular response to insulin stimulus [GO:0032869]; cellular response to xenobiotic stimulus [GO:0071466]; circadian rhythm [GO:0007623]; detection of oxidative stress [GO:0070994]; fatty acid beta-oxidation [GO:0006635]; fatty acid oxidation [GO:0019395]; g…
LC-MS/MS	ZYX	FALSE	Protein	TRUE	ZYX	Q15942	Q15942	Q15942	ZYX_HUMAN	Zyxin (Zyxin-2)	572	Acetylation;Alternative splicing;Cell adhesion;Cell junction;Cytoplasm;Cytoskeleton;Direct protein sequencing;Host-virus interaction;LIM domain;Metal-binding;Methylation;Nucleus;Phosphoprotein;Reference proteome;Repeat;Zinc	cell-cell signaling [GO:0007267]; cell-matrix adhesion [GO:0007160]; cellular response to type II interferon [GO:0071346]; integrin-mediated signaling pathway [GO:0007229]; stress fiber assembly [GO:0043149]; transforming growth factor beta receptor signaling pathway [GO:0007179]
LC-MS/MS	ECM1	FALSE	Protein	TRUE	ECM1	Q16610	Q16610	Q16610	ECM1_HUMAN	Extracellular matrix protein 1 (Secretory component p85)	540	Alternative splicing;Angiogenesis;Biomineralization;Disease variant;Extracellular matrix;Glycoprotein;Mineral balance;Osteogenesis;Reference proteome;Repeat;Secreted;Signal	angiogenesis [GO:0001525]; biomineral tissue development [GO:0031214]; chondrocyte development [GO:0002063]; endochondral bone growth [GO:0003416]; inflammatory response [GO:0006954]; negative regulation of bone mineralization [GO:0030502]; negative regulation of cytokine-mediated signaling pathway [GO:0001960]; negative regulation of peptidase activity [GO:0010466]; ossification [GO:0001503]; po…
LC-MS/MS	ACTBL2	FALSE	Protein	TRUE	ACTBL2	Q562R1	Q562R1	Q562R1	ACTBL_HUMAN	Beta-actin-like protein 2 (Kappa-actin)	376	ATP-binding;Cytoplasm;Cytoskeleton;Nucleotide-binding;Oxidation;Reference proteome	axonogenesis [GO:0007409]; cell motility [GO:0048870]
LC-MS/MS	STXBP5	FALSE	Protein	TRUE	STXBP5	Q5T5C0	Q5T5C0	Q5T5C0	STXB5_HUMAN	Syntaxin-binding protein 5 (Lethal(2) giant larvae protein homolog 3) (Tomosyn-1)	1151	Alternative splicing;Cell membrane;Coiled coil;Cytoplasm;Cytoplasmic vesicle;Exocytosis;Membrane;Phosphoprotein;Protein transport;Reference proteome;Repeat;Synapse;Transport;WD repeat	exocytosis [GO:0006887]; positive regulation of exocytosis [GO:0045921]; protein transport [GO:0015031]; regulation of exocytosis [GO:0017157]; regulation of protein secretion [GO:0050708]; regulation of synaptic vesicle exocytosis [GO:2000300]; regulation of synaptic vesicle priming [GO:0010807]
LC-MS/MS	H3[C1,C15;-3A,4,5]	FALSE	Protein	TRUE	H3-5	Q6NXT2	Q6NXT2	Q6NXT2	H3C_HUMAN	Histone H3.3C (Histone H3.5)	135	3D-structure;Acetylation;ADP-ribosylation;Chromosome;Citrullination;DNA-binding;Hydroxylation;Methylation;Nucleosome core;Nucleus;Phosphoprotein;Reference proteome;Ubl conjugation	positive regulation of cell growth [GO:0030307]
LC-MS/MS	H3[C1,C15;-3A,4,5]	FALSE	Protein	FALSE	H3C15	Q71DI3	Q71DI3	Q71DI3	H32_HUMAN	Histone H3.2 (H3-clustered histone 13) (H3-clustered histone 14) (H3-clustered histone 15) (Histone H3/m) (Histone H3/o)	136	3D-structure;Acetylation;ADP-ribosylation;Chromosome;Citrullination;Direct protein sequencing;DNA-binding;Hydroxylation;Lipoprotein;Methylation;Nucleosome core;Nucleus;Palmitate;Phosphoprotein;Reference proteome;Ubl conjugation	chromatin organization [GO:0006325]; nucleosome assembly [GO:0006334]
LC-MS/MS	H3[C1,C15;-3A,4,5]	FALSE	Protein	FALSE	H3-4	Q16695	Q16695	Q16695	H31T_HUMAN	Histone H3.1t (H3/t) (H3t) (H3/g) (Histone H3.4)	136	3D-structure;Acetylation;ADP-ribosylation;Chromosome;Citrullination;DNA-binding;Hydroxylation;Methylation;Nucleosome core;Nucleus;Phosphoprotein;Reference proteome;Ubl conjugation	chromatin organization [GO:0006325]; nucleosome assembly [GO:0006334]
LC-MS/MS	H3[C1,C15;-3A,4,5]	FALSE	Protein	FALSE	H3-3A	P84243	P84243	P84243	H33_HUMAN	Histone H3.3	136	3D-structure;Acetylation;ADP-ribosylation;Chromosome;Citrullination;Direct protein sequencing;Disease variant;DNA-binding;Hydroxylation;Intellectual disability;Lipoprotein;Methylation;Nucleosome core;Nucleus;Phosphoprotein;Reference proteome;Ubl conjugation	cell population proliferation [GO:0008283]; embryo implantation [GO:0007566]; male gonad development [GO:0008584]; multicellular organism growth [GO:0035264]; muscle cell differentiation [GO:0042692]; negative regulation of chromosome condensation [GO:1902340]; nucleosome assembly [GO:0006334]; nucleus organization [GO:0006997]; oocyte maturation [GO:0001556]; osteoblast differentiation [GO:00016…
LC-MS/MS	H3[C1,C15;-3A,4,5]	FALSE	Protein	FALSE	H3C1	P68431	P68431	P68431	H31_HUMAN	Histone H3.1 (Histone H3/a) (Histone H3/b) (Histone H3/c) (Histone H3/d) (Histone H3/f) (Histone H3/h) (Histone H3/i) (Histone H3/j) (Histone H3/k) (Histone H3/l)	136	3D-structure;Acetylation;ADP-ribosylation;Chromosome;Citrullination;Direct protein sequencing;Disease variant;DNA-binding;Hydroxylation;Lipoprotein;Methylation;Nucleosome core;Nucleus;Phosphoprotein;Reference proteome;Ubl conjugation	chromatin organization [GO:0006325]; epigenetic regulation of gene expression [GO:0040029]; gene expression [GO:0010467]; nucleosome assembly [GO:0006334]; telomere organization [GO:0032200]
LC-MS/MS	PI16	FALSE	Protein	TRUE	PI16	Q6UXB8	Q6UXB8	Q6UXB8	PI16_HUMAN	Peptidase inhibitor 16 (PI-16) (Cysteine-rich secretory protein 9) (CRISP-9) (PSP94-binding protein) (CD antigen CD364)	463	Alternative splicing;Direct protein sequencing;Glycoprotein;Protease inhibitor;Reference proteome;Secreted;Signal	negative regulation of cell growth involved in cardiac muscle cell development [GO:0061052]
LC-MS/MS	WDR87	FALSE	Protein	TRUE	WDR87	Q6ZQQ6	Q6ZQQ6	Q6ZQQ6	WDR87_HUMAN	WD repeat-containing protein 87 (Testis development protein NYD-SP11)	2873	Alternative splicing;Reference proteome;Repeat;WD repeat
LC-MS/MS	CCDC73	FALSE	Protein	TRUE	CCDC73	Q6ZRK6	Q6ZRK6	Q6ZRK6	CCD73_HUMAN	Coiled-coil domain-containing protein 73 (Sarcoma antigen NY-SAR-79)	1079	Alternative splicing;Coiled coil;Reference proteome
LC-MS/MS	CFAP20DC	FALSE	Protein	TRUE	CFAP20DC	Q6ZVT6	Q6ZVT6	Q6ZVT6	CF20D_HUMAN	Protein CFAP20DC (Uncharacterized protein C3orf67)	689	Alternative splicing;Reference proteome
LC-MS/MS	MYH14	FALSE	Protein	TRUE	MYH14	Q7Z406	Q7Z406	Q7Z406	MYH14_HUMAN	Myosin-14 (Myosin heavy chain 14) (Myosin heavy chain, non-muscle IIc) (Non-muscle myosin heavy chain IIc) (NMHC II-C)	1995	3D-structure;Acetylation;Actin-binding;Alternative splicing;ATP-binding;Calmodulin-binding;Cell shape;Coiled coil;Deafness;Direct protein sequencing;Disease variant;Motor protein;Myosin;Neuropathy;Non-syndromic deafness;Nucleotide-binding;Phosphoprotein;Reference proteome	actin filament-based movement [GO:0030048]; actomyosin structure organization [GO:0031032]; mitochondrion morphogenesis [GO:0070584]; neuronal action potential [GO:0019228]; regulation of cell shape [GO:0008360]; sensory perception of sound [GO:0007605]; skeletal muscle contraction [GO:0003009]; skeletal muscle tissue development [GO:0007519]; vocalization behavior [GO:0071625]
LC-MS/MS	FERMT3	FALSE	Protein	TRUE	FERMT3	Q86UX7	Q86UX7	Q86UX7	URP2_HUMAN	Fermitin family homolog 3 (Kindlin-3) (MIG2-like protein) (Unc-112-related protein 2)	667	3D-structure;Alternative splicing;Cell adhesion;Cell junction;Cell projection;Direct protein sequencing;Disease variant;Phosphoprotein;Reference proteome	cell-matrix adhesion [GO:0007160]; integrin activation [GO:0033622]; integrin-mediated signaling pathway [GO:0007229]; leukocyte cell-cell adhesion [GO:0007159]; platelet aggregation [GO:0070527]; positive regulation of cell migration [GO:0030335]; regulation of cell-cell adhesion mediated by integrin [GO:0033632]; substrate adhesion-dependent cell spreading [GO:0034446]
LC-MS/MS	ZSWIM9	FALSE	Protein	TRUE	ZSWIM9	Q86XI8	Q86XI8	Q86XI8	ZSWM9_HUMAN	Uncharacterized protein ZSWIM9	627	Alternative splicing;Isopeptide bond;Reference proteome;Ubl conjugation
LC-MS/MS	SLC2A[3,14]	FALSE	Protein	TRUE	SLC2A14	Q8TDB8	Q8TDB8	Q8TDB8	GTR14_HUMAN	Solute carrier family 2, facilitated glucose transporter member 14 (Glucose transporter type 14) (GLUT-14)	520	Alternative splicing;Cell membrane;Developmental protein;Differentiation;Glycoprotein;Membrane;Reference proteome;Spermatogenesis;Sugar transport;Transmembrane;Transmembrane helix;Transport	cell differentiation [GO:0030154]; dehydroascorbic acid transport [GO:0070837]; glucose import [GO:0046323]; glucose transmembrane transport [GO:1904659]; spermatogenesis [GO:0007283]
LC-MS/MS	SLC2A[3,14]	FALSE	Protein	FALSE	SLC2A3	P11169	P11169	P11169	GTR3_HUMAN	Solute carrier family 2, facilitated glucose transporter member 3 (Glucose transporter type 3, brain) (GLUT-3)	496	3D-structure;Cell membrane;Cell projection;Glycoprotein;Membrane;Phosphoprotein;Reference proteome;Sugar transport;Transmembrane;Transmembrane helix;Transport	carbohydrate metabolic process [GO:0005975]; dehydroascorbic acid transport [GO:0070837]; galactose transmembrane transport [GO:0015757]; glucose import [GO:0046323]; glucose import across plasma membrane [GO:0098708]; glucose transmembrane transport [GO:1904659]; L-ascorbic acid metabolic process [GO:0019852]; transport across blood-brain barrier [GO:0150104]
LC-MS/MS	WHAMM	FALSE	Protein	TRUE	WHAMM	Q8TF30	Q8TF30	Q8TF30	WHAMM_HUMAN	WASP homolog-associated protein with actin, membranes and microtubules (WAS protein homology region 2 domain-containing protein 1) (WH2 domain-containing protein 1)	809	3D-structure;Actin-binding;Coiled coil;Cytoplasm;Cytoplasmic vesicle;Golgi apparatus;Membrane;Microtubule;Phosphoprotein;Reference proteome;Repeat	actin filament organization [GO:0007015]; Arp2/3 complex-mediated actin nucleation [GO:0034314]; endoplasmic reticulum to Golgi vesicle-mediated transport [GO:0006888]; focal adhesion assembly [GO:0048041]; lamellipodium assembly [GO:0030032]; plasma membrane tubulation [GO:0097320]; positive regulation of actin nucleation [GO:0051127]
LC-MS/MS	SLC5A11	FALSE	Protein	TRUE	SLC5A11	Q8WWX8	Q8WWX8	Q8WWX8	SC5AB_HUMAN	Sodium/myo-inositol cotransporter 2 (Na(+)/myo-inositol cotransporter 2) (Sodium-dependent glucose cotransporter) (Sodium/glucose cotransporter KST1) (Sodium/myo-inositol transporter 2) (SMIT2) (Solute carrier family 5 member 11)	675	Alternative splicing;Apoptosis;Cell membrane;Ion transport;Membrane;Reference proteome;Sodium;Sodium transport;Sugar transport;Symport;Transmembrane;Transmembrane helix;Transport	apoptotic process [GO:0006915]; myo-inositol transport [GO:0015798]
LC-MS/MS	ADGRV1	FALSE	Protein	TRUE	ADGRV1	Q8WXG9	Q8WXG9	Q8WXG9	AGRV1_HUMAN	Adhesion G-protein coupled receptor V1 (ADGRV1) (EC 3.4.-.-) (G-protein coupled receptor 98) (Monogenic audiogenic seizure susceptibility protein 1 homolog) (Usher syndrome type-2C protein) (Very large G-protein coupled receptor 1) [Cleaved into: ADGRV1 subunit alpha; ADGRV1 subunit beta]	6306	Alternative splicing;Calcium;Cell membrane;Cell projection;Deafness;G-protein coupled receptor;Hydrolase;Membrane;Receptor;Reference proteome;Repeat;Retinitis pigmentosa;Sensory transduction;Signal;Transducer;Transmembrane;Transmembrane helix;Usher syndrome;Vision	cell surface receptor signaling pathway [GO:0007166]; cell-cell adhesion [GO:0098609]; cellular response to calcium ion [GO:0071277]; detection of mechanical stimulus involved in sensory perception of sound [GO:0050910]; establishment of protein localization [GO:0045184]; G protein-coupled receptor signaling pathway [GO:0007186]; inner ear development [GO:0048839]; inner ear receptor cell differe…
LC-MS/MS	CFHR4	FALSE	Protein	TRUE	CFHR4	Q92496	Q92496	Q92496	FHR4_HUMAN	Complement factor H-related protein 4 (FHR-4)	578	Alternative splicing;Direct protein sequencing;Disulfide bond;Glycoprotein;Reference proteome;Repeat;Secreted;Signal;Sushi	complement activation [GO:0006956]
LC-MS/MS	DPF2	FALSE	Protein	TRUE	DPF2	Q92785	Q92785	Q92785	REQU_HUMAN	Zinc finger protein ubi-d4 (Apoptosis response zinc finger protein) (BRG1-associated factor 45D) (BAF45D) (D4, zinc and double PHD fingers family 2) (Protein requiem)	391	3D-structure;Acetylation;Alternative splicing;Apoptosis;Chromatin regulator;Cytoplasm;Disease variant;Intellectual disability;Isopeptide bond;Metal-binding;Nucleus;Phosphoprotein;Reference proteome;Repeat;Transcription;Transcription regulation;Ubl conjugation;Zinc;Zinc-finger	apoptotic process [GO:0006915]; apoptotic signaling pathway [GO:0097190]; chromatin remodeling [GO:0006338]; negative regulation of myeloid progenitor cell differentiation [GO:1905454]; negative regulation of transcription by RNA polymerase II [GO:0000122]; nervous system development [GO:0007399]; positive regulation of double-strand break repair [GO:2000781]; positive regulation of stem cell pop…
LC-MS/MS	PRG4	FALSE	Protein	TRUE	PRG4	Q92954	Q92954	Q92954	PRG4_HUMAN	Proteoglycan 4 (Lubricin) (Megakaryocyte-stimulating factor) (Superficial zone proteoglycan) [Cleaved into: Proteoglycan 4 C-terminal part]	1404	Alternative splicing;Disulfide bond;Glycoprotein;Proteoglycan;Reference proteome;Repeat;Secreted;Signal	immune response [GO:0006955]
LC-MS/MS	CPB2	FALSE	Protein	TRUE	CPB2	Q96IY4	Q96IY4	Q96IY4	CBPB2_HUMAN	Carboxypeptidase B2 (EC 3.4.17.20) (Carboxypeptidase U) (CPU) (Plasma carboxypeptidase B) (pCPB) (Thrombin-activable fibrinolysis inhibitor) (TAFI)	423	3D-structure;Alternative splicing;Blood coagulation;Carboxypeptidase;Direct protein sequencing;Disulfide bond;Fibrinolysis;Glycoprotein;Hemostasis;Hydrolase;Metal-binding;Metalloprotease;Protease;Reference proteome;Secreted;Signal;Zinc;Zymogen	blood coagulation [GO:0007596]; cellular response to glucose stimulus [GO:0071333]; fibrinolysis [GO:0042730]; liver regeneration [GO:0097421]; negative regulation of fibrinolysis [GO:0051918]; negative regulation of hepatocyte proliferation [GO:2000346]; negative regulation of plasminogen activation [GO:0010757]; positive regulation of extracellular matrix constituent secretion [GO:0003331]; pro…
LC-MS/MS	GARIN1B	FALSE	Protein	TRUE	GARIN1B	Q96KD3	Q96KD3	Q96KD3	GAR1B_HUMAN	Golgi-associated RAB2 interactor protein 1B (Testis development protein NYD-SP18)	344	Alternative splicing;Golgi apparatus;Reference proteome	acrosome assembly [GO:0001675]; acrosome reaction [GO:0007340]
LC-MS/MS	CNDP1	FALSE	Protein	TRUE	CNDP1	Q96KN2	Q96KN2	Q96KN2	CNDP1_HUMAN	Beta-Ala-His dipeptidase (EC 3.4.13.20) (CNDP dipeptidase 1) (Carnosine dipeptidase 1) (Glutamate carboxypeptidase-like protein 2) (Serum carnosinase)	507	3D-structure;Carboxypeptidase;Glycoprotein;Hydrolase;Metal-binding;Metalloprotease;Phosphoprotein;Protease;Reference proteome;Secreted;Signal;Zinc	proteolysis [GO:0006508]; regulation of protein metabolic process [GO:0051246]
LC-MS/MS	TNIP3	FALSE	Protein	TRUE	TNIP3	Q96KP6	Q96KP6	Q96KP6	TNIP3_HUMAN	TNFAIP3-interacting protein 3 (A20-binding inhibitor of NF-kappa-B activation 3) (ABIN-3) (Listeria-induced gene protein)	325	Alternative splicing;Coiled coil;Inflammatory response;Reference proteome	cellular response to lipopolysaccharide [GO:0071222]; inflammatory response [GO:0006954]; MyD88-independent toll-like receptor signaling pathway [GO:0002756]; negative regulation of canonical NF-kappaB signal transduction [GO:0043124]; regulation of transcription by RNA polymerase II [GO:0006357]; toll-like receptor 4 signaling pathway [GO:0034142]
LC-MS/MS	PGLYRP2	FALSE	Protein	TRUE	PGLYRP2	Q96PD5	Q96PD5	Q96PD5	PGRP2_HUMAN	N-acetylmuramoyl-L-alanine amidase (EC 3.5.1.28) (Peptidoglycan recognition protein 2) (Peptidoglycan recognition protein long) (PGRP-L)	576	Alternative splicing;Direct protein sequencing;Disulfide bond;Glycoprotein;Hydrolase;Immunity;Membrane;Metal-binding;Phosphoprotein;Reference proteome;Secreted;Signal;Zinc	biological process involved in interaction with host [GO:0051701]; defense response to Gram-positive bacterium [GO:0050830]; detection of bacterium [GO:0016045]; innate immune response [GO:0045087]; negative regulation of natural killer cell differentiation involved in immune response [GO:0032827]; negative regulation of type II interferon production [GO:0032689]; peptide amidation [GO:0001519]; …
LC-MS/MS	OR5M11	FALSE	Protein	TRUE	OR5M11	Q96RB7	Q96RB7	Q96RB7	OR5MB_HUMAN	Olfactory receptor 5M11	305	Cell membrane;Disulfide bond;G-protein coupled receptor;Glycoprotein;Membrane;Olfaction;Receptor;Reference proteome;Sensory transduction;Transducer;Transmembrane;Transmembrane helix	G protein-coupled receptor signaling pathway [GO:0007186]; sensory perception of smell [GO:0007608]
LC-MS/MS	TCF12	FALSE	Protein	TRUE	TCF12	Q99081	Q99081	Q99081	HTF4_HUMAN	Transcription factor 12 (TCF-12) (Class B basic helix-loop-helix protein 20) (bHLHb20) (DNA-binding protein HTF4) (E-box-binding protein) (Transcription factor HTF-4)	682	3D-structure;Alternative splicing;Craniosynostosis;Developmental protein;Differentiation;Disease variant;DNA-binding;Hypogonadotropic hypogonadism;Isopeptide bond;Kallmann syndrome;Neurogenesis;Nucleus;Phosphoprotein;Reference proteome;Transcription;Transcription regulation;Ubl conjugation	cell differentiation [GO:0030154]; gene expression [GO:0010467]; immune response [GO:0006955]; muscle organ development [GO:0007517]; nervous system development [GO:0007399]; positive regulation of gene expression [GO:0010628]; positive regulation of neuron differentiation [GO:0045666]; positive regulation of transcription by RNA polymerase II [GO:0045944]; regulation of transcription by RNA poly…
LC-MS/MS	H2A	FALSE	Protein	TRUE	H2AC14	Q99878	Q99878	Q99878	H2A1J_HUMAN	Histone H2A type 1-J (Histone H2A/e)	128	Acetylation;Chromosome;Citrullination;DNA-binding;Hydroxylation;Isopeptide bond;Methylation;Nucleosome core;Nucleus;Phosphoprotein;Reference proteome;Ubl conjugation
LC-MS/MS	H2A	FALSE	Protein	FALSE	H2AC12	Q96KK5	Q96KK5	Q96KK5	H2A1H_HUMAN	Histone H2A type 1-H (H2A-clustered histone 12) (Histone H2A/s)	128	Acetylation;Chromosome;Citrullination;DNA-binding;Hydroxylation;Isopeptide bond;Methylation;Nucleosome core;Nucleus;Phosphoprotein;Reference proteome;Ubl conjugation
LC-MS/MS	H2A	FALSE	Protein	FALSE	H2AJ	Q9BTM1	Q9BTM1	Q9BTM1	H2AJ_HUMAN	Histone H2A.J (H2a/j)	129	3D-structure;Acetylation;Alternative splicing;Chromosome;DNA-binding;Isopeptide bond;Methylation;Nucleosome core;Nucleus;Phosphoprotein;Reference proteome;Ubl conjugation
LC-MS/MS	H2A	FALSE	Protein	FALSE	H2AC20	Q16777	Q16777	Q16777	H2A2C_HUMAN	Histone H2A type 2-C (H2A-clustered histone 20) (Histone H2A-GL101) (Histone H2A/q)	129	3D-structure;Acetylation;Chromosome;Citrullination;DNA-binding;Hydroxylation;Isopeptide bond;Methylation;Nucleosome core;Nucleus;Phosphoprotein;Reference proteome;Ubl conjugation
LC-MS/MS	H2A	FALSE	Protein	FALSE	H2AC6	Q93077	Q93077	Q93077	H2A1C_HUMAN	Histone H2A type 1-C (H2A-clustered histone 6) (Histone H2A/l)	130	3D-structure;Acetylation;Chromosome;Citrullination;DNA-binding;Hydroxylation;Isopeptide bond;Methylation;Nucleosome core;Nucleus;Phosphoprotein;Reference proteome;Ubl conjugation	negative regulation of cell population proliferation [GO:0008285]
LC-MS/MS	H2A	FALSE	Protein	FALSE	H2AC25	Q7L7L0	Q7L7L0	Q7L7L0	H2A3_HUMAN	Histone H2A type 3 (H2A-clustered histone 25)	130	Acetylation;Chromosome;Citrullination;DNA-binding;Hydroxylation;Isopeptide bond;Methylation;Nucleosome core;Nucleus;Phosphoprotein;Reference proteome;Ubl conjugation	nucleosome disassembly [GO:0006337]; UV-damage excision repair [GO:0070914]
LC-MS/MS	H2A	FALSE	Protein	FALSE	H2AC18	Q6FI13	Q6FI13	Q6FI13	H2A2A_HUMAN	Histone H2A type 2-A (H2A-clustered histone 18) (H2A-clustered histone 19) (Histone H2A.2) (Histone H2A/o)	130	3D-structure;Acetylation;Chromosome;Citrullination;DNA-binding;Hydroxylation;Isopeptide bond;Methylation;Nucleosome core;Nucleus;Phosphoprotein;Reference proteome;Ubl conjugation
LC-MS/MS	H2A	FALSE	Protein	FALSE	H2AC7	P20671	P20671	P20671	H2A1D_HUMAN	Histone H2A type 1-D (Histone H2A.3) (Histone H2A/g)	130	3D-structure;Acetylation;Chromosome;Citrullination;DNA-binding;Hydroxylation;Isopeptide bond;Methylation;Nucleosome core;Nucleus;Phosphoprotein;Reference proteome;Ubl conjugation
LC-MS/MS	H2A	FALSE	Protein	FALSE	H2AC11	P0C0S8	P0C0S8	P0C0S8	H2A1_HUMAN	Histone H2A type 1 (H2A.1) (Histone H2A/ptl)	130	3D-structure;Acetylation;Chromosome;Citrullination;DNA-binding;Hydroxylation;Isopeptide bond;Methylation;Nucleosome core;Nucleus;Phosphoprotein;Reference proteome;Ubl conjugation
LC-MS/MS	H2A	FALSE	Protein	FALSE	H2AC4	P04908	P04908	P04908	H2A1B_HUMAN	Histone H2A type 1-B/E (Histone H2A.2) (Histone H2A/a) (Histone H2A/m)	130	3D-structure;Acetylation;Chromosome;Citrullination;DNA-binding;Hydroxylation;Isopeptide bond;Methylation;Nucleosome core;Nucleus;Phosphoprotein;Reference proteome;Ubl conjugation	chromatin organization [GO:0006325]; negative regulation of cell population proliferation [GO:0008285]; protein localization to CENP-A containing chromatin [GO:0061644]
LC-MS/MS	H2A	FALSE	Protein	FALSE	H2AC1	Q96QV6	Q96QV6	Q96QV6	H2A1A_HUMAN	Histone H2A type 1-A (H2A-clustered histone 1) (Histone H2A/r)	131	3D-structure;Acetylation;Chromosome;Citrullination;DNA-binding;Hydroxylation;Isopeptide bond;Methylation;Nucleosome core;Nucleus;Phosphoprotein;Reference proteome;Ubl conjugation	chromatin organization [GO:0006325]
LC-MS/MS	H2A	FALSE	Protein	FALSE	H2AX	P16104	P16104	P16104	H2AX_HUMAN	Histone H2AX (H2a/x) (Histone H2A.X)	143	3D-structure;Acetylation;Cell cycle;Chromosome;DNA damage;DNA recombination;DNA repair;DNA-binding;Host-virus interaction;Isopeptide bond;Meiosis;Nucleosome core;Nucleus;Phosphoprotein;Reference proteome;Ubl conjugation	cellular response to gamma radiation [GO:0071480]; cellular senescence [GO:0090398]; cerebral cortex development [GO:0021987]; DNA damage checkpoint signaling [GO:0000077]; DNA damage response [GO:0006974]; double-strand break repair [GO:0006302]; double-strand break repair via homologous recombination [GO:0000724]; meiotic cell cycle [GO:0051321]; nucleosome assembly [GO:0006334]; positive regul…
LC-MS/MS	H2B	FALSE	Protein	TRUE	H2BC13	Q99880	Q99880	Q99880	H2B1L_HUMAN	Histone H2B type 1-L (Histone H2B.c) (H2B/c)	126	Acetylation;ADP-ribosylation;Chromosome;Direct protein sequencing;DNA-binding;Glycoprotein;Hydroxylation;Isopeptide bond;Methylation;Nucleosome core;Nucleus;Phosphoprotein;Reference proteome;Ubl conjugation	nucleosome assembly [GO:0006334]
LC-MS/MS	H2B	FALSE	Protein	FALSE	H2BC14	Q99879	Q99879	Q99879	H2B1M_HUMAN	Histone H2B type 1-M (Histone H2B.e) (H2B/e)	126	Acetylation;ADP-ribosylation;Chromosome;Direct protein sequencing;DNA-binding;Glycoprotein;Hydroxylation;Isopeptide bond;Methylation;Nucleosome core;Nucleus;Phosphoprotein;Reference proteome;Ubl conjugation	nucleosome assembly [GO:0006334]
LC-MS/MS	H2B	FALSE	Protein	FALSE	H2BC15	Q99877	Q99877	Q99877	H2B1N_HUMAN	Histone H2B type 1-N (Histone H2B.d) (H2B/d)	126	Acetylation;ADP-ribosylation;Chromosome;Direct protein sequencing;DNA-binding;Glycoprotein;Hydroxylation;Isopeptide bond;Methylation;Nucleosome core;Nucleus;Phosphoprotein;Reference proteome;Ubl conjugation	nucleosome assembly [GO:0006334]
LC-MS/MS	H2B	FALSE	Protein	FALSE	H2BC9	Q93079	Q93079	Q93079	H2B1H_HUMAN	Histone H2B type 1-H (H2B-clustered histone 9) (Histone H2B.j) (H2B/j)	126	Acetylation;ADP-ribosylation;Chromosome;Direct protein sequencing;DNA-binding;Glycoprotein;Hydroxylation;Isopeptide bond;Methylation;Nucleosome core;Nucleus;Phosphoprotein;Reference proteome;Ubl conjugation	nucleosome assembly [GO:0006334]
LC-MS/MS	H2B	FALSE	Protein	FALSE	H2BC26	Q8N257	Q8N257	Q8N257	H2B3B_HUMAN	Histone H2B type 3-B (H2B type 12) (H2B-clustered histone 26) (H2B.U histone 1)	126	3D-structure;Acetylation;ADP-ribosylation;Chromosome;Direct protein sequencing;DNA-binding;Glycoprotein;Hydroxylation;Isopeptide bond;Methylation;Nucleosome core;Nucleus;Phosphoprotein;Reference proteome;Ubl conjugation
LC-MS/MS	H2B	FALSE	Protein	FALSE	H2BC18	Q5QNW6	Q5QNW6	Q5QNW6	H2B2F_HUMAN	Histone H2B type 2-F (H2B-clustered histone 18)	126	3D-structure;Acetylation;ADP-ribosylation;Alternative splicing;Chromosome;DNA-binding;Glycoprotein;Hydroxylation;Isopeptide bond;Methylation;Nucleosome core;Nucleus;Phosphoprotein;Reference proteome;Ubl conjugation
LC-MS/MS	H2B	FALSE	Protein	FALSE	H2BC21	Q16778	Q16778	Q16778	H2B2E_HUMAN	Histone H2B type 2-E (H2B-clustered histone 21) (Histone H2B-GL105) (Histone H2B.q) (H2B/q)	126	3D-structure;Acetylation;ADP-ribosylation;Antibiotic;Antimicrobial;Chromosome;Direct protein sequencing;DNA-binding;Glycoprotein;Hydroxylation;Isopeptide bond;Methylation;Nucleosome core;Nucleus;Phosphoprotein;Reference proteome;Ubl conjugation	antibacterial humoral response [GO:0019731]; antimicrobial humoral immune response mediated by antimicrobial peptide [GO:0061844]; defense response to Gram-positive bacterium [GO:0050830]; innate immune response in mucosa [GO:0002227]; nucleosome assembly [GO:0006334]
LC-MS/MS	H2B	FALSE	Protein	FALSE	H2BC4	P62807	P62807	P62807	H2B1C_HUMAN	Histone H2B type 1-C/E/F/G/I (Histone H2B.1 A) (Histone H2B.a) (H2B/a) (Histone H2B.g) (H2B/g) (Histone H2B.h) (H2B/h) (Histone H2B.k) (H2B/k) (Histone H2B.l) (H2B/l)	126	3D-structure;Acetylation;ADP-ribosylation;Antibiotic;Antimicrobial;Chromosome;Direct protein sequencing;DNA-binding;Glycoprotein;Hydroxylation;Isopeptide bond;Methylation;Nucleosome core;Nucleus;Phosphoprotein;Reference proteome;Ubl conjugation	antibacterial humoral response [GO:0019731]; antimicrobial humoral immune response mediated by antimicrobial peptide [GO:0061844]; defense response to Gram-positive bacterium [GO:0050830]; innate immune response in mucosa [GO:0002227]; nucleosome assembly [GO:0006334]
LC-MS/MS	H2B	FALSE	Protein	FALSE	H2BC5	P58876	P58876	P58876	H2B1D_HUMAN	Histone H2B type 1-D (H2B-clustered histone 5) (HIRA-interacting protein 2) (Histone H2B.1 B) (Histone H2B.b) (H2B/b)	126	Acetylation;ADP-ribosylation;Chromosome;Direct protein sequencing;DNA-binding;Glycoprotein;Hydroxylation;Isopeptide bond;Methylation;Nucleosome core;Nucleus;Phosphoprotein;Reference proteome;Ubl conjugation
LC-MS/MS	H2B	FALSE	Protein	FALSE	H2BC12L	P57053	P57053	P57053	H2BFS_HUMAN	Histone H2B type F-S (H2B-clustered histone 12 like) (H2B.S histone 1) (Histone H2B.s) (H2B/s)	126	Acetylation;ADP-ribosylation;Antibiotic;Antimicrobial;Chromosome;Direct protein sequencing;DNA-binding;Glycoprotein;Hydroxylation;Isopeptide bond;Methylation;Nucleosome core;Nucleus;Phosphoprotein;Reference proteome;Ubl conjugation	antibacterial humoral response [GO:0019731]; antimicrobial humoral immune response mediated by antimicrobial peptide [GO:0061844]; defense response to Gram-positive bacterium [GO:0050830]; innate immune response in mucosa [GO:0002227]; substantia nigra development [GO:0021762]
LC-MS/MS	H2B	FALSE	Protein	FALSE	H2BC3	P33778	P33778	P33778	H2B1B_HUMAN	Histone H2B type 1-B (H2B-clustered histone 3) (Histone H2B.1) (Histone H2B.f) (H2B/f)	126	3D-structure;Acetylation;ADP-ribosylation;Chromosome;DNA-binding;Glycoprotein;Hydroxylation;Isopeptide bond;Methylation;Nucleosome core;Nucleus;Phosphoprotein;Reference proteome;Ubl conjugation	nucleosome assembly [GO:0006334]
LC-MS/MS	H2B	FALSE	Protein	FALSE	H2BC17	P23527	P23527	P23527	H2B1O_HUMAN	Histone H2B type 1-O (H2B-clustered histone 17) (Histone H2B.2) (Histone H2B.n) (H2B/n)	126	3D-structure;Acetylation;ADP-ribosylation;Chromosome;Direct protein sequencing;DNA-binding;Glycoprotein;Hydroxylation;Isopeptide bond;Methylation;Nucleosome core;Nucleus;Phosphoprotein;Reference proteome;Ubl conjugation	nucleosome assembly [GO:0006334]
LC-MS/MS	H2B	FALSE	Protein	FALSE	H2BC11	P06899	P06899	P06899	H2B1J_HUMAN	Histone H2B type 1-J (Histone H2B.1) (Histone H2B.r) (H2B/r)	126	3D-structure;Acetylation;ADP-ribosylation;Antibiotic;Antimicrobial;Chromosome;Direct protein sequencing;DNA-binding;Glycoprotein;Hydroxylation;Isopeptide bond;Methylation;Nucleosome core;Nucleus;Phosphoprotein;Reference proteome;Ubl conjugation	antibacterial humoral response [GO:0019731]; antimicrobial humoral immune response mediated by antimicrobial peptide [GO:0061844]; chromatin organization [GO:0006325]; defense response to Gram-negative bacterium [GO:0050829]; defense response to Gram-positive bacterium [GO:0050830]; innate immune response in mucosa [GO:0002227]; killing of cells of another organism [GO:0031640]; negative regulati…
LC-MS/MS	H2B	FALSE	Protein	FALSE	H2BC12	O60814	O60814	O60814	H2B1K_HUMAN	Histone H2B type 1-K (H2B K) (HIRA-interacting protein 1)	126	3D-structure;Acetylation;ADP-ribosylation;Antibiotic;Antimicrobial;Chromosome;Direct protein sequencing;DNA-binding;Glycoprotein;Hydroxylation;Isopeptide bond;Methylation;Nucleosome core;Nucleus;Phosphoprotein;Reference proteome;Ubl conjugation	antibacterial humoral response [GO:0019731]; antimicrobial humoral immune response mediated by antimicrobial peptide [GO:0061844]; defense response to Gram-negative bacterium [GO:0050829]; defense response to Gram-positive bacterium [GO:0050830]; innate immune response in mucosa [GO:0002227]; killing of cells of another organism [GO:0031640]
LC-MS/MS	H2B	FALSE	Protein	FALSE	H2BC1	Q96A08	Q96A08	Q96A08	H2B1A_HUMAN	Histone H2B type 1-A (Histone H2B, testis) (TSH2B.1) (hTSH2B) (Testis-specific histone H2B)	127	3D-structure;Acetylation;Chromosome;DNA-binding;Isopeptide bond;Methylation;Nucleosome core;Nucleus;Phosphoprotein;Reference proteome;Ubl conjugation	chromosome organization [GO:0051276]; inflammatory response [GO:0006954]; mononuclear cell migration [GO:0071674]; nucleosome assembly [GO:0006334]; nucleosome disassembly [GO:0006337]; plasminogen activation [GO:0031639]; sperm DNA condensation [GO:0035092]
LC-MS/MS	CARD9	FALSE	Protein	TRUE	CARD9	Q9H257	Q9H257	Q9H257	CARD9_HUMAN	Caspase recruitment domain-containing protein 9 (hCARD9)	536	3D-structure;Adaptive immunity;Alternative splicing;Coiled coil;Cytoplasm;Disease variant;Immunity;Innate immunity;Isopeptide bond;Metal-binding;Phosphoprotein;Reference proteome;Ubl conjugation;Zinc	antifungal innate immune response [GO:0061760]; canonical NF-kappaB signal transduction [GO:0007249]; defense response to Gram-positive bacterium [GO:0050830]; defense response to virus [GO:0051607]; host-mediated regulation of intestinal microbiota composition [GO:0048874]; immunoglobulin mediated immune response [GO:0016064]; JNK cascade [GO:0007254]; neutrophil mediated immunity [GO:0002446]; …
LC-MS/MS	SH3BGRL3	FALSE	Protein	TRUE	SH3BGRL3	Q9H299	Q9H299	Q9H299	SH3L3_HUMAN	SH3 domain-binding glutamic acid-rich-like protein 3 (SH3 domain-binding protein 1) (SH3BP-1) (TNF inhibitory protein B1) (TIP-B1)	93	3D-structure;Acetylation;Cell membrane;Cell projection;Cytoplasm;Direct protein sequencing;Glycoprotein;Membrane;Nucleus;Reference proteome	cytoskeleton organization [GO:0007010]
LC-MS/MS	TUBB[1,8,7¡8b]	FALSE	Protein	TRUE	TUBB1	Q9H4B7	Q9H4B7	Q9H4B7	TBB1_HUMAN	Tubulin beta-1 chain	451	Cytoplasm;Cytoskeleton;Direct protein sequencing;Disease variant;GTP-binding;Isopeptide bond;Magnesium;Metal-binding;Microtubule;Nucleotide-binding;Phosphoprotein;Reference proteome	microtubule cytoskeleton organization [GO:0000226]; microtubule polymerization [GO:0046785]; mitotic cell cycle [GO:0000278]; platelet aggregation [GO:0070527]; platelet formation [GO:0030220]; spindle assembly [GO:0051225]; thyroid gland development [GO:0030878]; thyroid hormone transport [GO:0070327]
LC-MS/MS	TUBB[1,8,7¡8b]	FALSE	Protein	FALSE	TUBB8	Q3ZCM7	Q3ZCM7	Q3ZCM7	TBB8_HUMAN	Tubulin beta-8 chain (Tubulin beta 8 class VIII)	444	Cytoplasm;Cytoskeleton;Disease variant;GTP-binding;Isopeptide bond;Magnesium;Metal-binding;Microtubule;Nucleotide-binding;Phosphoprotein;Reference proteome	microtubule cytoskeleton organization [GO:0000226]; mitotic cell cycle [GO:0000278]; oocyte maturation [GO:0001556]; spindle assembly involved in female meiosis [GO:0007056]
LC-MS/MS	TUBB[1,8,7¡8b]	FALSE	Protein	FALSE	TUBB8B	A6NNZ2	A6NNZ2	A6NNZ2	TBB8B_HUMAN	Tubulin beta 8B	444	Cytoplasm;Cytoskeleton;GTP-binding;Isopeptide bond;Magnesium;Metal-binding;Microtubule;Nucleotide-binding;Phosphoprotein;Reference proteome	microtubule cytoskeleton organization [GO:0000226]; mitotic cell cycle [GO:0000278]
LC-MS/MS	PRR36	FALSE	Protein	TRUE	PRR36	Q9H6K5	Q9H6K5	Q9H6K5	PRR36_HUMAN	Proline-rich protein 36	1346	Alternative splicing;Phosphoprotein;Reference proteome
LC-MS/MS	ARNT2	FALSE	Protein	TRUE	ARNT2	Q9HBZ2	Q9HBZ2	Q9HBZ2	ARNT2_HUMAN	Aryl hydrocarbon receptor nuclear translocator 2 (ARNT protein 2) (Class E basic helix-loop-helix protein 1) (bHLHe1)	717	Alternative splicing;DNA-binding;Methylation;Nucleus;Reference proteome;Repeat;Transcription;Transcription regulation	brain development [GO:0007420]; central nervous system development [GO:0007417]; in utero embryonic development [GO:0001701]; positive regulation of DNA-templated transcription [GO:0045893]; positive regulation of transcription by RNA polymerase II [GO:0045944]; regulation of DNA-templated transcription [GO:0006355]; regulation of transcription by RNA polymerase II [GO:0006357]; response to hypox…
LC-MS/MS	ABCB9	FALSE	Protein	TRUE	ABCB9	Q9NP78	Q9NP78	Q9NP78	ABCB9_HUMAN	ABC-type oligopeptide transporter ABCB9 (EC 7.4.2.6) (ATP-binding cassette sub-family B member 9) (ATP-binding cassette transporter 9) (ABC transporter 9 protein) (hABCB9) (TAP-like protein) (TAPL)	766	Alternative splicing;ATP-binding;Lysosome;Membrane;Nucleotide-binding;Peptide transport;Protein transport;Reference proteome;Translocase;Transmembrane;Transmembrane helix;Transport	peptide metabolic process [GO:0006518]; peptide transport [GO:0015833]; protein transport [GO:0015031]; transmembrane transport [GO:0055085]
LC-MS/MS	GPCPD1	FALSE	Protein	TRUE	GPCPD1	Q9NPB8	Q9NPB8	Q9NPB8	GPCP1_HUMAN	Glycerophosphocholine phosphodiesterase GPCPD1 (EC 3.1.4.2) (Glycerophosphodiester phosphodiesterase 5)	672	3D-structure;Cytoplasm;Hydrolase;Phosphoprotein;Reference proteome	glycerophospholipid catabolic process [GO:0046475]; skeletal muscle tissue development [GO:0007519]
LC-MS/MS	IFT46	FALSE	Protein	TRUE	IFT46	Q9NQC8	Q9NQC8	Q9NQC8	IFT46_HUMAN	Intraflagellar transport protein 46 homolog	304	Alternative splicing;Cell projection;Cilium;Cytoplasm;Cytoskeleton;Phosphoprotein;Reference proteome	cilium assembly [GO:0060271]; intraciliary anterograde transport [GO:0035720]; intraciliary transport [GO:0042073]; protein stabilization [GO:0050821]
LC-MS/MS	RAB[6A-B,39A]	FALSE	Protein	TRUE	RAB6B	Q9NRW1	Q9NRW1	Q9NRW1	RAB6B_HUMAN	Ras-related protein Rab-6B (EC 3.6.5.2)	208	3D-structure;Alternative splicing;Cytoplasmic vesicle;ER-Golgi transport;Golgi apparatus;GTP-binding;Hydrolase;Lipoprotein;Membrane;Methylation;Nucleotide-binding;Phosphoprotein;Prenylation;Protein transport;Reference proteome;Transport	Golgi organization [GO:0007030]; intra-Golgi vesicle-mediated transport [GO:0006891]; intracellular protein transport [GO:0006886]; neuron projection development [GO:0031175]; protein localization to Golgi membrane [GO:1903292]; retrograde transport, endosome to Golgi [GO:0042147]; retrograde vesicle-mediated transport, Golgi to endoplasmic reticulum [GO:0006890]
LC-MS/MS	RAB[6A-B,39A]	FALSE	Protein	FALSE	RAB6A	P20340	P20340	P20340	RAB6A_HUMAN	Ras-related protein Rab-6A (Rab-6)	208	3D-structure;Acetylation;Alternative splicing;Cytoplasmic vesicle;Direct protein sequencing;ER-Golgi transport;Golgi apparatus;GTP-binding;Host-virus interaction;Lipoprotein;Membrane;Methylation;Nucleotide-binding;Phosphoprotein;Prenylation;Protein transport;Reference proteome;Transport	antigen processing and presentation [GO:0019882]; early endosome to Golgi transport [GO:0034498]; intra-Golgi vesicle-mediated transport [GO:0006891]; intracellular protein transport [GO:0006886]; localization [GO:0051179]; minus-end-directed organelle transport along microtubule [GO:0072385]; neuron projection development [GO:0031175]; peptidyl-cysteine methylation [GO:0018125]; protein localiza…
LC-MS/MS	RAB[6A-B,39A]	FALSE	Protein	FALSE	RAB39A	Q14964	Q14964	Q14964	RB39A_HUMAN	Ras-related protein Rab-39A (Rab-39)	217	Autophagy;Cell membrane;Cytoplasmic vesicle;GTP-binding;Lipoprotein;Lysosome;Membrane;Methylation;Nucleotide-binding;Prenylation;Protein transport;Reference proteome;Transport	autophagy [GO:0006914]; phagosome acidification [GO:0090383]; phagosome-lysosome fusion [GO:0090385]; protein transport [GO:0015031]; Rab protein signal transduction [GO:0032482]; vesicle-mediated transport [GO:0016192]
LC-MS/MS	C1RL	FALSE	Protein	TRUE	C1RL	Q9NZP8	Q9NZP8	Q9NZP8	C1RL_HUMAN	Complement C1r subcomponent-like protein (C1r-LP) (C1r-like protein) (EC 3.4.21.-) (C1r-like serine protease analog protein) (CLSPa)	487	Complement pathway;Disulfide bond;Glycoprotein;Hydrolase;Immunity;Innate immunity;Protease;Reference proteome;Secreted;Serine protease;Signal;Sushi	complement activation, classical pathway [GO:0006958]; innate immune response [GO:0045087]; zymogen activation [GO:0031638]
LC-MS/MS	GULP1	FALSE	Protein	TRUE	GULP1	Q9UBP9	Q9UBP9	Q9UBP9	GULP1_HUMAN	PTB domain-containing engulfment adapter protein 1 (Cell death protein 6 homolog) (PTB domain adapter protein CED-6) (Protein GULP)	304	3D-structure;Alternative splicing;Apoptosis;Coiled coil;Cytoplasm;Lipid transport;Phagocytosis;Phosphoprotein;Reference proteome;Transport	apoptotic process [GO:0006915]; lipid transport [GO:0006869]; phagocytosis, engulfment [GO:0006911]
LC-MS/MS	BIN2	FALSE	Protein	TRUE	BIN2	Q9UBW5	Q9UBW5	Q9UBW5	BIN2_HUMAN	Bridging integrator 2 (Breast cancer-associated protein 1)	565	3D-structure;Alternative splicing;Cell junction;Cell membrane;Cell projection;Coiled coil;Cytoplasm;Membrane;Phosphoprotein;Reference proteome	cell chemotaxis [GO:0060326]; phagocytosis, engulfment [GO:0006911]; plasma membrane tubulation [GO:0097320]; podosome assembly [GO:0071800]
LC-MS/MS	ZMYM2	FALSE	Protein	TRUE	ZMYM2	Q9UBW7	Q9UBW7	Q9UBW7	ZMYM2_HUMAN	Zinc finger MYM-type protein 2 (Fused in myeloproliferative disorders protein) (Rearranged in atypical myeloproliferative disorder protein) (Zinc finger protein 198)	1377	Alternative splicing;Chromosomal rearrangement;Disease variant;Intellectual disability;Isopeptide bond;Metal-binding;Nucleus;Phosphoprotein;Reference proteome;Repeat;Transcription;Transcription regulation;Ubl conjugation;Zinc;Zinc-finger	negative regulation of DNA-templated transcription [GO:0045892]
LC-MS/MS	FETUB	FALSE	Protein	TRUE	FETUB	Q9UGM5	Q9UGM5	Q9UGM5	FETUB_HUMAN	Fetuin-B (16G2) (Fetuin-like protein IRL685) (Gugu)	382	3D-structure;Alternative splicing;Disulfide bond;Fertilization;Glycoprotein;Metalloenzyme inhibitor;Metalloprotease inhibitor;Phosphoprotein;Protease inhibitor;Reference proteome;Repeat;Secreted;Signal	binding of sperm to zona pellucida [GO:0007339]; negative regulation of endopeptidase activity [GO:0010951]; single fertilization [GO:0007338]
LC-MS/MS	PCYOX1	FALSE	Protein	TRUE	PCYOX1	Q9UHG3	Q9UHG3	Q9UHG3	PCYOX_HUMAN	Prenylcysteine oxidase 1 (EC 1.8.3.5) (Prenylcysteine lyase)	505	Alternative splicing;Direct protein sequencing;FAD;Flavoprotein;Glycoprotein;Lysosome;Oxidoreductase;Reference proteome;Signal	prenylated protein catabolic process [GO:0030327]; prenylcysteine catabolic process [GO:0030328]
LC-MS/MS	SERPINA10	FALSE	Protein	TRUE	SERPINA10	Q9UK55	Q9UK55	Q9UK55	ZPI_HUMAN	Protein Z-dependent protease inhibitor (PZ-dependent protease inhibitor) (PZI) (Serpin A10)	444	3D-structure;Blood coagulation;Direct protein sequencing;Glycoprotein;Hemostasis;Heparin-binding;Phosphoprotein;Protease inhibitor;Reference proteome;Secreted;Serine protease inhibitor;Signal	blood coagulation [GO:0007596]; liver regeneration [GO:0097421]
LC-MS/MS	JPT1	FALSE	Protein	TRUE	JPT1	Q9UK76	Q9UK76	Q9UK76	JUPI1_HUMAN	Jupiter microtubule associated homolog 1 (Androgen-regulated protein 2) (Hematological and neurological expressed 1 protein) [Cleaved into: Jupiter microtubule associated homolog 1, N-terminally processed]	154	Acetylation;Alternative splicing;Cytoplasm;Direct protein sequencing;Nucleus;Phosphoprotein;Reference proteome
LC-MS/MS	CORO1C	FALSE	Protein	TRUE	CORO1C	Q9ULV4	Q9ULV4	Q9ULV4	COR1C_HUMAN	Coronin-1C (Coronin-3) (hCRNN4)	474	3D-structure;Acetylation;Actin-binding;Alternative splicing;Cell membrane;Cell projection;Coiled coil;Cytoplasm;Cytoskeleton;Endosome;Membrane;Reference proteome;Repeat;Synapse;WD repeat	actin filament organization [GO:0007015]; activation of GTPase activity [GO:0090630]; corpus callosum development [GO:0022038]; endosomal transport [GO:0016197]; endosome fission [GO:0140285]; endosome membrane tubulation [GO:0097750]; establishment of protein localization [GO:0045184]; membrane fission [GO:0090148]; negative regulation of epithelial cell migration [GO:0010633]; negative regulati…
LC-MS/MS	TLN1	FALSE	Protein	TRUE	TLN1	Q9Y490	Q9Y490	Q9Y490	TLN1_HUMAN	Talin-1	2541	3D-structure;Acetylation;Alternative splicing;Cell junction;Cell membrane;Cell projection;Cytoplasm;Cytoskeleton;Direct protein sequencing;Host-virus interaction;Membrane;Phosphoprotein;Reference proteome	cell-cell adhesion [GO:0098609]; cell-cell junction assembly [GO:0007043]; cell-substrate junction assembly [GO:0007044]; cortical actin cytoskeleton organization [GO:0030866]; integrin activation [GO:0033622]; integrin-mediated signaling pathway [GO:0007229]; platelet aggregation [GO:0070527]; regulation of focal adhesion assembly [GO:0051893]
LC-MS/MS	PCDHB12	FALSE	Protein	TRUE	PCDHB12	Q9Y5F1	Q9Y5F1	Q9Y5F1	PCDBC_HUMAN	Protocadherin beta-12 (PCDH-beta-12)	795	Alternative splicing;Calcium;Cell adhesion;Cell membrane;Glycoprotein;Membrane;Reference proteome;Repeat;Signal;Transmembrane;Transmembrane helix	cell adhesion [GO:0007155]; homophilic cell adhesion via plasma membrane adhesion molecules [GO:0007156]; nervous system development [GO:0007399]
LC-MS/MS	FCGBP	FALSE	Protein	TRUE	FCGBP	Q9Y6R7	Q9Y6R7	Q9Y6R7	FCGBP_HUMAN	IgGFc-binding protein (Fcgamma-binding protein antigen) (FcgammaBP)	5405	Disulfide bond;Glycoprotein;Reference proteome;Repeat;Secreted;Signal
Bioplex	CKINE6	FALSE	cytokines	TRUE	CCL21	O00585	O00585	O00585	CCL21_HUMAN	C-C motif chemokine 21 (6Ckine) (Beta-chemokine exodus-2) (Secondary lymphoid-tissue chemokine) (SLC) (Small-inducible cytokine A21)	134	3D-structure;Chemotaxis;Cytokine;Direct protein sequencing;Disulfide bond;Inflammatory response;Reference proteome;Secreted;Signal	activation of GTPase activity [GO:0090630]; cell chemotaxis [GO:0060326]; cell maturation [GO:0048469]; cell-cell signaling [GO:0007267]; cellular response to chemokine [GO:1990869]; cellular response to interleukin-1 [GO:0071347]; cellular response to tumor necrosis factor [GO:0071356]; cellular response to type II interferon [GO:0071346]; chemokine (C-C motif) ligand 21 signaling pathway [GO:00…
Bioplex	BCA1	FALSE	cytokines	TRUE	CXCL13	O43927	O43927	O43927	CXL13_HUMAN	C-X-C motif chemokine 13 (Angie) (B cell-attracting chemokine 1) (BCA-1) (B lymphocyte chemoattractant) (CXC chemokine BLC) (Small-inducible cytokine B13)	109	3D-structure;Chemotaxis;Cytokine;Disulfide bond;Inflammatory response;Reference proteome;Secreted;Signal	activation of GTPase activity [GO:0090630]; antimicrobial humoral immune response mediated by antimicrobial peptide [GO:0061844]; B cell chemotaxis [GO:0035754]; cell surface receptor signaling pathway [GO:0007166]; cell-cell signaling [GO:0007267]; cellular response to lipopolysaccharide [GO:0071222]; chemokine-mediated signaling pathway [GO:0070098]; chronic inflammatory response [GO:0002544]; …
Bioplex	CTACK	FALSE	cytokines	TRUE	CCL27	Q9Y4X3	Q9Y4X3	Q9Y4X3	CCL27_HUMAN	C-C motif chemokine 27 (CC chemokine ILC) (Cutaneous T-cell-attracting chemokine) (CTACK) (ESkine) (IL-11 R-alpha-locus chemokine) (Skinkine) (Small-inducible cytokine A27)	112	3D-structure;Cytokine;Direct protein sequencing;Disulfide bond;Reference proteome;Secreted;Signal	cell-cell signaling [GO:0007267]; chemotaxis [GO:0006935]; immune response [GO:0006955]
Bioplex	ENA78	FALSE	cytokines	TRUE	CXCL5	P42830	P42830	P42830	CXCL5_HUMAN	C-X-C motif chemokine 5 (ENA-78(1-78)) (Epithelial-derived neutrophil-activating protein 78) (Neutrophil-activating peptide ENA-78) (Small-inducible cytokine B5) [Cleaved into: ENA-78(8-78); ENA-78(9-78)]	114	3D-structure;Cytokine;Direct protein sequencing;Disulfide bond;Reference proteome;Secreted;Signal	antimicrobial humoral immune response mediated by antimicrobial peptide [GO:0061844]; cell-cell signaling [GO:0007267]; cellular response to lipopolysaccharide [GO:0071222]; chemokine-mediated signaling pathway [GO:0070098]; chemotaxis [GO:0006935]; inflammatory response [GO:0006954]; neutrophil chemotaxis [GO:0030593]; positive regulation of cell population proliferation [GO:0008284]; signal tra…
Bioplex	Eotaxin	FALSE	cytokines	TRUE	CCL11	P51671	P51671	P51671	CCL11_HUMAN	Eotaxin (C-C motif chemokine 11) (Eosinophil chemotactic protein) (Small-inducible cytokine A11)	97	3D-structure;Chemotaxis;Cytokine;Direct protein sequencing;Disulfide bond;Glycoprotein;Inflammatory response;Reference proteome;Secreted;Signal	cell adhesion [GO:0007155]; cellular response to interleukin-1 [GO:0071347]; cellular response to tumor necrosis factor [GO:0071356]; cellular response to type II interferon [GO:0071346]; chemokine-mediated signaling pathway [GO:0070098]; chemotaxis [GO:0006935]; cytoskeleton organization [GO:0007010]; eosinophil chemotaxis [GO:0048245]; G protein-coupled receptor signaling pathway [GO:0007186]; …
Bioplex	Eotaxin2	FALSE	cytokines	TRUE	CCL24	O00175	O00175	O00175	CCL24_HUMAN	C-C motif chemokine 24 (CK-beta-6) (Eosinophil chemotactic protein 2) (Eotaxin-2) (Myeloid progenitor inhibitory factor 2) (MPIF-2) (Small-inducible cytokine A24)	119	3D-structure;Chemotaxis;Cytokine;Direct protein sequencing;Disulfide bond;Glycoprotein;Inflammatory response;Reference proteome;Secreted;Signal	cell-cell signaling [GO:0007267]; cellular response to interleukin-1 [GO:0071347]; cellular response to tumor necrosis factor [GO:0071356]; cellular response to type II interferon [GO:0071346]; chemokine-mediated signaling pathway [GO:0070098]; chemotaxis [GO:0006935]; cytoskeleton organization [GO:0007010]; eosinophil chemotaxis [GO:0048245]; G protein-coupled receptor signaling pathway [GO:0007…
Bioplex	Eotaxin3	FALSE	cytokines	TRUE	CCL26	Q9Y258	Q9Y258	Q9Y258	CCL26_HUMAN	C-C motif chemokine 26 (CC chemokine IMAC) (Eotaxin-3) (Macrophage inflammatory protein 4-alpha) (MIP-4-alpha) (Small-inducible cytokine A26) (Thymic stroma chemokine-1) (TSC-1)	94	3D-structure;Chemotaxis;Cytokine;Direct protein sequencing;Disulfide bond;Inflammatory response;Reference proteome;Secreted;Signal	cell-cell signaling [GO:0007267]; cellular response to interleukin-1 [GO:0071347]; cellular response to tumor necrosis factor [GO:0071356]; cellular response to type II interferon [GO:0071346]; chemokine-mediated signaling pathway [GO:0070098]; chemotaxis [GO:0006935]; eosinophil chemotaxis [GO:0048245]; G protein-coupled receptor signaling pathway [GO:0007186]; inflammatory response [GO:0006954]…
Bioplex	Fractalkine	FALSE	cytokines	TRUE	CX3CL1	P78423	P78423	P78423	X3CL1_HUMAN	Fractalkine (C-X3-C motif chemokine 1) (CX3C membrane-anchored chemokine) (Neurotactin) (Small-inducible cytokine D1) [Cleaved into: Processed fractalkine]	397	3D-structure;Cell adhesion;Cell membrane;Chemotaxis;Cytokine;Disulfide bond;Glycoprotein;Host-virus interaction;Inflammatory response;Membrane;Reference proteome;Secreted;Signal;Transmembrane;Transmembrane helix	angiogenesis involved in wound healing [GO:0060055]; autocrine signaling [GO:0035425]; cell adhesion [GO:0007155]; cell chemotaxis [GO:0060326]; cell-cell adhesion [GO:0098609]; cell-cell signaling [GO:0007267]; cellular response to interleukin-1 [GO:0071347]; cellular response to tumor necrosis factor [GO:0071356]; cellular response to type II interferon [GO:0071346]; chemokine-mediated signalin…
Bioplex	GCP2	FALSE	cytokines	TRUE	CXCL6	P80162	P80162	P80162	CXCL6_HUMAN	C-X-C motif chemokine 6 (Chemokine alpha 3) (CKA-3) (Granulocyte chemotactic protein 2) (GCP-2) (Small-inducible cytokine B6) [Cleaved into: Small-inducible cytokine B6, N-processed variant 1; Small-inducible cytokine B6, N-processed variant 2; Small-inducible cytokine B6, N-processed variant 3]	114	Antibiotic;Antimicrobial;Chemotaxis;Cytokine;Direct protein sequencing;Disulfide bond;Heparin-binding;Reference proteome;Secreted;Signal	antimicrobial humoral immune response mediated by antimicrobial peptide [GO:0061844]; cell-cell signaling [GO:0007267]; cellular response to lipopolysaccharide [GO:0071222]; chemokine-mediated signaling pathway [GO:0070098]; chemotaxis [GO:0006935]; defense response to bacterium [GO:0042742]; inflammatory response [GO:0006954]; leukocyte homeostasis [GO:0001776]; neutrophil activation [GO:0042119…
Bioplex	GMCSF	FALSE	cytokines	TRUE	CSF2	P04141	P04141	P04141	CSF2_HUMAN	Granulocyte-macrophage colony-stimulating factor (GM-CSF) (Colony-stimulating factor) (CSF) (Molgramostin) (Sargramostim)	144	3D-structure;Cytokine;Disulfide bond;Glycoprotein;Growth factor;Pharmaceutical;Reference proteome;Secreted;Signal	cell population proliferation [GO:0008283]; cellular response to granulocyte macrophage colony-stimulating factor stimulus [GO:0097011]; cellular response to lipopolysaccharide [GO:0071222]; dendritic cell differentiation [GO:0097028]; embryonic placenta development [GO:0001892]; epithelial fluid transport [GO:0042045]; granulocyte-macrophage colony-stimulating factor signaling pathway [GO:003815…
Bioplex	Groa	FALSE	cytokines	TRUE	CXCL1	P09341	P09341	P09341	GROA_HUMAN	Growth-regulated alpha protein (C-X-C motif chemokine 1) (GRO-alpha(1-73)) (Melanoma growth stimulatory activity) (MGSA) (Neutrophil-activating protein 3) (NAP-3) [Cleaved into: GRO-alpha(4-73); GRO-alpha(5-73); GRO-alpha(6-73)]	107	3D-structure;Cytokine;Direct protein sequencing;Disulfide bond;Growth factor;Inflammatory response;Reference proteome;Secreted;Signal	actin cytoskeleton organization [GO:0030036]; antimicrobial humoral immune response mediated by antimicrobial peptide [GO:0061844]; cellular response to lipopolysaccharide [GO:0071222]; chemokine-mediated signaling pathway [GO:0070098]; chemotaxis [GO:0006935]; G protein-coupled receptor signaling pathway [GO:0007186]; inflammatory response [GO:0006954]; intracellular signal transduction [GO:0035…
Bioplex	Grob	FALSE	cytokines	TRUE	CXCL2	P19875	P19875	P19875	CXCL2_HUMAN	C-X-C motif chemokine 2 (Growth-regulated protein beta) (Gro-beta) (Macrophage inflammatory protein 2-alpha) (MIP2-alpha) [Cleaved into: GRO-beta(5-73) (GRO-beta-T) (Hematopoietic synergistic factor) (HSF) (SB-251353)]	107	3D-structure;Chemotaxis;Cytokine;Direct protein sequencing;Disulfide bond;Inflammatory response;Pharmaceutical;Reference proteome;Secreted;Signal	antimicrobial humoral immune response mediated by antimicrobial peptide [GO:0061844]; cellular response to lipopolysaccharide [GO:0071222]; chemokine-mediated signaling pathway [GO:0070098]; chemotaxis [GO:0006935]; inflammatory response [GO:0006954]; neutrophil chemotaxis [GO:0030593]; response to molecule of bacterial origin [GO:0002237]
Bioplex	I309	FALSE	cytokines	TRUE	CCL1	P22362	P22362	P22362	CCL1_HUMAN	C-C motif chemokine 1 (Small-inducible cytokine A1) (T lymphocyte-secreted protein I-309)	96	3D-structure;Chemotaxis;Cytokine;Direct protein sequencing;Disulfide bond;Glycoprotein;Reference proteome;Secreted;Signal	cellular response to interleukin-1 [GO:0071347]; cellular response to tumor necrosis factor [GO:0071356]; cellular response to type II interferon [GO:0071346]; chemokine-mediated signaling pathway [GO:0070098]; chemotaxis [GO:0006935]; eosinophil chemotaxis [GO:0048245]; G protein-coupled receptor signaling pathway [GO:0007186]; inflammatory response [GO:0006954]; intracellular calcium ion homeos…
Bioplex	IFNg	FALSE	cytokines	TRUE	IFNG	P01579	P01579	P01579	IFNG_HUMAN	Interferon gamma (IFN-gamma) (Immune interferon)	166	3D-structure;Antiviral defense;Cleavage on pair of basic residues;Cytokine;Direct protein sequencing;Glycoprotein;Growth regulation;Pharmaceutical;Pyrrolidone carboxylic acid;Reference proteome;Secreted;Signal	adaptive immune response [GO:0002250]; apoptotic process [GO:0006915]; astrocyte activation [GO:0048143]; cell surface receptor signaling pathway [GO:0007166]; cellular response to virus [GO:0098586]; defense response to virus [GO:0051607]; extrinsic apoptotic signaling pathway [GO:0097191]; humoral immune response [GO:0006959]; macrophage activation involved in immune response [GO:0002281]; macr…
Bioplex	IL1beta	FALSE	cytokines	TRUE	IL1B	P01584	P01584	P01584	IL1B_HUMAN	Interleukin-1 beta (IL-1 beta) (Catabolin)	269	3D-structure;Cytokine;Cytoplasm;Direct protein sequencing;Inflammatory response;Lysosome;Mitogen;Pyrogen;Reference proteome;Secreted	apoptotic process [GO:0006915]; astrocyte activation [GO:0048143]; canonical NF-kappaB signal transduction [GO:0007249]; cell-cell signaling [GO:0007267]; cellular response to interleukin-17 [GO:0097398]; cellular response to lipopolysaccharide [GO:0071222]; cellular response to mechanical stimulus [GO:0071260]; cellular response to organic substance [GO:0071310]; cellular response to xenobiotic …
Bioplex	IL1ra	FALSE	cytokines	TRUE	IL1RN	P18510	P18510	P18510	IL1RA_HUMAN	Interleukin-1 receptor antagonist protein (IL-1RN) (IL-1ra) (IRAP) (ICIL-1RA) (IL1 inhibitor) (Anakinra)	177	3D-structure;Alternative splicing;Cytoplasm;Direct protein sequencing;Disulfide bond;Glycoprotein;Pharmaceutical;Reference proteome;Secreted;Signal	acute-phase response [GO:0006953]; immune response [GO:0006955]; inflammatory response to antigenic stimulus [GO:0002437]; insulin secretion [GO:0030073]; lipid metabolic process [GO:0006629]; negative regulation of heterotypic cell-cell adhesion [GO:0034115]; negative regulation of interleukin-1-mediated signaling pathway [GO:2000660]; response to glucocorticoid [GO:0051384]
Bioplex	IL2	FALSE	cytokines	TRUE	IL2	P60568	P60568	P60568	IL2_HUMAN	Interleukin-2 (IL-2) (T-cell growth factor) (TCGF) (Aldesleukin)	153	3D-structure;Adaptive immunity;Chromosomal rearrangement;Cytokine;Direct protein sequencing;Disulfide bond;Glycoprotein;Growth factor;Immunity;Pharmaceutical;Proto-oncogene;Reference proteome;Secreted;Signal	activated T cell proliferation [GO:0050798]; adaptive immune response [GO:0002250]; cell adhesion [GO:0007155]; cell-cell signaling [GO:0007267]; extrinsic apoptotic signaling pathway in absence of ligand [GO:0097192]; immune response [GO:0006955]; interleukin-2-mediated signaling pathway [GO:0038110]; leukocyte activation involved in immune response [GO:0002366]; natural killer cell activation […
Bioplex	IL4	FALSE	cytokines	TRUE	IL4	P05112	P05112	P05112	IL4_HUMAN	Interleukin-4 (IL-4) (B-cell stimulatory factor 1) (BSF-1) (Binetrakin) (Lymphocyte stimulatory factor 1) (Pitrakinra)	153	3D-structure;Alternative splicing;B-cell activation;Cytokine;Direct protein sequencing;Disulfide bond;Glycoprotein;Growth factor;Reference proteome;Secreted;Signal	activation of Janus kinase activity [GO:0042976]; B cell costimulation [GO:0031296]; B cell differentiation [GO:0030183]; cholesterol metabolic process [GO:0008203]; dendritic cell differentiation [GO:0097028]; extrinsic apoptotic signaling pathway in absence of ligand [GO:0097192]; immune response [GO:0006955]; innate immune response in mucosa [GO:0002227]; interleukin-4-mediated signaling pathw…
Bioplex	IL6	FALSE	cytokines	TRUE	IL6	P05231	P05231	P05231	IL6_HUMAN	Interleukin-6 (IL-6) (B-cell stimulatory factor 2) (BSF-2) (CTL differentiation factor) (CDF) (Hybridoma growth factor) (Interferon beta-2) (IFN-beta-2)	212	3D-structure;Acute phase;Cytokine;Direct protein sequencing;Disulfide bond;Glycoprotein;Growth factor;Phosphoprotein;Reference proteome;Secreted;Signal	acute-phase response [GO:0006953]; cellular response to hydrogen peroxide [GO:0070301]; cellular response to lipopolysaccharide [GO:0071222]; cellular response to virus [GO:0098586]; cytokine-mediated signaling pathway [GO:0019221]; defense response to Gram-negative bacterium [GO:0050829]; defense response to Gram-positive bacterium [GO:0050830]; defense response to virus [GO:0051607]; endocrine …
Bioplex	IL8	FALSE	cytokines	TRUE	CXCL8	P10145	P10145	P10145	IL8_HUMAN	Interleukin-8 (IL-8) (C-X-C motif chemokine 8) (Chemokine (C-X-C motif) ligand 8) (Emoctakin) (Granulocyte chemotactic protein 1) (GCP-1) (Monocyte-derived neutrophil chemotactic factor) (MDNCF) (Monocyte-derived neutrophil-activating peptide) (MONAP) (Neutrophil-activating protein 1) (NAP-1) (Protein 3-10C) (T-cell chemotactic factor) [Cleaved into: MDNCF-a (GCP/IL-8 protein IV) (IL8/NAP1 form I…	99	3D-structure;Chemotaxis;Citrullination;Cytokine;Direct protein sequencing;Disulfide bond;Inflammatory response;Reference proteome;Secreted;Signal	angiogenesis [GO:0001525]; antimicrobial humoral immune response mediated by antimicrobial peptide [GO:0061844]; calcium-mediated signaling [GO:0019722]; cellular response to fibroblast growth factor stimulus [GO:0044344]; cellular response to interleukin-1 [GO:0071347]; cellular response to lipopolysaccharide [GO:0071222]; cellular response to tumor necrosis factor [GO:0071356]; chemokine-mediat…
Bioplex	IL9	FALSE	cytokines	TRUE	IL9	P15248	P15248	P15248	IL9_HUMAN	Interleukin-9 (IL-9) (Cytokine P40) (T-cell growth factor P40)	144	3D-structure;Cytokine;Glycoprotein;Growth factor;Pyrrolidone carboxylic acid;Reference proteome;Secreted;Signal	B cell differentiation [GO:0030183]; B cell proliferation [GO:0042100]; immunoglobulin mediated immune response [GO:0016064]; inflammatory response [GO:0006954]; positive regulation of cell growth [GO:0030307]; positive regulation of cell population proliferation [GO:0008284]; positive regulation of interleukin-5 production [GO:0032754]; regulation of peptidyl-tyrosine phosphorylation [GO:0050730…
Bioplex	IL10	FALSE	cytokines	TRUE	IL10	P22301	P22301	P22301	IL10_HUMAN	Interleukin-10 (IL-10) (Cytokine synthesis inhibitory factor) (CSIF)	178	3D-structure;Cytokine;Direct protein sequencing;Disease variant;Disulfide bond;Glycoprotein;Reference proteome;Secreted;Signal	B cell differentiation [GO:0030183]; B cell proliferation [GO:0042100]; branching involved in labyrinthine layer morphogenesis [GO:0060670]; cellular response to estradiol stimulus [GO:0071392]; cellular response to hepatocyte growth factor stimulus [GO:0035729]; cellular response to lipopolysaccharide [GO:0071222]; chronic inflammatory response to antigenic stimulus [GO:0002439]; cytoplasmic seq…
Bioplex	IL16	FALSE	cytokines	TRUE	IL16	Q14005	Q14005	Q14005	IL16_HUMAN	Pro-interleukin-16 [Cleaved into: Interleukin-16 (IL-16) (Lymphocyte chemoattractant factor) (LCF)]	1332	3D-structure;Alternative promoter usage;Alternative splicing;Chemotaxis;Cytokine;Cytoplasm;Direct protein sequencing;Host-virus interaction;Nucleus;Phosphoprotein;Reference proteome;Repeat;Secreted;Transcription;Transcription regulation	immune response [GO:0006955]; induction of positive chemotaxis [GO:0050930]; leukocyte chemotaxis [GO:0030595]; positive regulation of inflammatory response [GO:0050729]; positive regulation of interleukin-1 alpha production [GO:0032730]; positive regulation of interleukin-12 production [GO:0032735]; positive regulation of interleukin-6 production [GO:0032755]; regulation of calcium ion transport…
Bioplex	IP10	FALSE	cytokines	TRUE	CXCL10	P02778	P02778	P02778	CXL10_HUMAN	C-X-C motif chemokine 10 (10 kDa interferon gamma-induced protein) (Gamma-IP10) (IP-10) (Small-inducible cytokine B10) [Cleaved into: CXCL10(1-73)]	98	3D-structure;Chemotaxis;Citrullination;Cytokine;Direct protein sequencing;Disulfide bond;Inflammatory response;Reference proteome;Secreted;Signal	adenylate cyclase-activating G protein-coupled receptor signaling pathway [GO:0007189]; antimicrobial humoral immune response mediated by antimicrobial peptide [GO:0061844]; antiviral innate immune response [GO:0140374]; blood circulation [GO:0008015]; cell surface receptor signaling pathway [GO:0007166]; cell-cell signaling [GO:0007267]; cellular response to heat [GO:0034605]; cellular response …
Bioplex	ITAC	FALSE	cytokines	TRUE	CXCL11	O14625	O14625	O14625	CXL11_HUMAN	C-X-C motif chemokine 11 (Beta-R1) (H174) (Interferon gamma-inducible protein 9) (IP-9) (Interferon-inducible T-cell alpha chemoattractant) (I-TAC) (Small-inducible cytokine B11)	94	3D-structure;Chemotaxis;Citrullination;Cytokine;Direct protein sequencing;Disulfide bond;Inflammatory response;Reference proteome;Secreted;Signal	adenylate cyclase-activating G protein-coupled receptor signaling pathway [GO:0007189]; antimicrobial humoral immune response mediated by antimicrobial peptide [GO:0061844]; cell-cell signaling [GO:0007267]; cellular response to lipopolysaccharide [GO:0071222]; chemokine-mediated signaling pathway [GO:0070098]; chemotaxis [GO:0006935]; inflammatory response [GO:0006954]; neutrophil chemotaxis [GO…
Bioplex	MCP1	FALSE	cytokines	TRUE	CCL2	P13500	P13500	P13500	CCL2_HUMAN	C-C motif chemokine 2 (HC11) (Monocyte chemoattractant protein 1) (Monocyte chemotactic and activating factor) (MCAF) (Monocyte chemotactic protein 1) (MCP-1) (Monocyte secretory protein JE) (Small-inducible cytokine A2)	99	3D-structure;Chemotaxis;Cytokine;Direct protein sequencing;Disulfide bond;Glycoprotein;Inflammatory response;Pyrrolidone carboxylic acid;Reference proteome;Secreted;Signal	angiogenesis [GO:0001525]; animal organ morphogenesis [GO:0009887]; astrocyte cell migration [GO:0043615]; cell adhesion [GO:0007155]; cell surface receptor signaling pathway [GO:0007166]; cellular homeostasis [GO:0019725]; cellular response to fibroblast growth factor stimulus [GO:0044344]; cellular response to interleukin-1 [GO:0071347]; cellular response to lipopolysaccharide [GO:0071222]; cel…
Bioplex	MCP2	FALSE	cytokines	TRUE	CCL8	P80075	P80075	P80075	CCL8_HUMAN	C-C motif chemokine 8 (HC14) (Monocyte chemoattractant protein 2) (Monocyte chemotactic protein 2) (MCP-2) (Small-inducible cytokine A8) [Cleaved into: MCP-2(6-76)]	99	3D-structure;Chemotaxis;Cytokine;Direct protein sequencing;Disulfide bond;Heparin-binding;Inflammatory response;Pyrrolidone carboxylic acid;Reference proteome;Secreted;Signal	calcium ion transport [GO:0006816]; cell-cell signaling [GO:0007267]; cellular response to interleukin-1 [GO:0071347]; cellular response to tumor necrosis factor [GO:0071356]; cellular response to type II interferon [GO:0071346]; chemokine-mediated signaling pathway [GO:0070098]; chemotaxis [GO:0006935]; eosinophil chemotaxis [GO:0048245]; exocytosis [GO:0006887]; G protein-coupled receptor signa…
Bioplex	MCP3	FALSE	cytokines	TRUE	CCL7	P80098	P80098	P80098	CCL7_HUMAN	C-C motif chemokine 7 (Monocyte chemoattractant protein 3) (Monocyte chemotactic protein 3) (MCP-3) (NC28) (Small-inducible cytokine A7)	99	3D-structure;Chemotaxis;Cytokine;Direct protein sequencing;Disulfide bond;Glycoprotein;Heparin-binding;Inflammatory response;Pyrrolidone carboxylic acid;Reference proteome;Secreted;Signal	cell-cell signaling [GO:0007267]; cellular response to interleukin-1 [GO:0071347]; cellular response to tumor necrosis factor [GO:0071356]; cellular response to type II interferon [GO:0071346]; chemokine-mediated signaling pathway [GO:0070098]; chemotaxis [GO:0006935]; cytoskeleton organization [GO:0007010]; eosinophil chemotaxis [GO:0048245]; G protein-coupled receptor signaling pathway [GO:0007…
Bioplex	MCP4	FALSE	cytokines	TRUE	CCL13	Q99616	Q99616	Q99616	CCL13_HUMAN	C-C motif chemokine 13 (CK-beta-10) (Monocyte chemoattractant protein 4) (Monocyte chemotactic protein 4) (MCP-4) (NCC-1) (Small-inducible cytokine A13) [Cleaved into: C-C motif chemokine 13, long chain; C-C motif chemokine 13, medium chain; C-C motif chemokine 13, short chain]	98	3D-structure;Chemotaxis;Cytokine;Direct protein sequencing;Disulfide bond;Inflammatory response;Pyrrolidone carboxylic acid;Reference proteome;Secreted;Signal	antimicrobial humoral immune response mediated by antimicrobial peptide [GO:0061844]; cell-cell signaling [GO:0007267]; cellular response to interleukin-1 [GO:0071347]; cellular response to tumor necrosis factor [GO:0071356]; cellular response to type II interferon [GO:0071346]; chemokine-mediated signaling pathway [GO:0070098]; chemotaxis [GO:0006935]; cytoskeleton organization [GO:0007010]; eos…
Bioplex	MDC	FALSE	cytokines	TRUE	CCL22	O00626	O00626	O00626	CCL22_HUMAN	C-C motif chemokine 22 (CC chemokine STCP-1) (MDC(1-69)) (Macrophage-derived chemokine) (Small-inducible cytokine A22) (Stimulated T-cell chemotactic protein 1) [Cleaved into: MDC(3-69); MDC(5-69); MDC(7-69)]	93	Chemotaxis;Cytokine;Direct protein sequencing;Disulfide bond;Reference proteome;Secreted;Signal	cell-cell signaling [GO:0007267]; cellular response to interleukin-1 [GO:0071347]; cellular response to tumor necrosis factor [GO:0071356]; cellular response to type II interferon [GO:0071346]; chemokine-mediated signaling pathway [GO:0070098]; chemotaxis [GO:0006935]; eosinophil chemotaxis [GO:0048245]; G protein-coupled receptor signaling pathway [GO:0007186]; immune response [GO:0006955]; infl…
Bioplex	MIF	FALSE	cytokines	TRUE	MIF	P14174	P14174	P14174	MIF_HUMAN	Macrophage migration inhibitory factor (MIF) (EC 5.3.2.1) (Glycosylation-inhibiting factor) (GIF) (L-dopachrome isomerase) (L-dopachrome tautomerase) (EC 5.3.3.12) (Phenylpyruvate tautomerase)	115	3D-structure;Acetylation;Cytokine;Cytoplasm;Direct protein sequencing;Immunity;Inflammatory response;Innate immunity;Isomerase;Reference proteome;Secreted	carboxylic acid metabolic process [GO:0019752]; cell surface receptor signaling pathway [GO:0007166]; cellular senescence [GO:0090398]; DNA damage response, signal transduction by p53 class mediator [GO:0030330]; inflammatory response [GO:0006954]; innate immune response [GO:0045087]; negative regulation of apoptotic process [GO:0043066]; negative regulation of cell migration [GO:0030336]; negati…
Bioplex	MIG	FALSE	cytokines	TRUE	CXCL9	Q07325	Q07325	Q07325	CXCL9_HUMAN	C-X-C motif chemokine 9 (Gamma-interferon-induced monokine) (Monokine induced by interferon-gamma) (HuMIG) (MIG) (Small-inducible cytokine B9)	125	Cytokine;Direct protein sequencing;Disulfide bond;Inflammatory response;Reference proteome;Secreted;Signal	adenylate cyclase-activating G protein-coupled receptor signaling pathway [GO:0007189]; antimicrobial humoral immune response mediated by antimicrobial peptide [GO:0061844]; cell-cell signaling [GO:0007267]; cellular defense response [GO:0006968]; cellular response to lipopolysaccharide [GO:0071222]; chemokine-mediated signaling pathway [GO:0070098]; chemotaxis [GO:0006935]; defense response [GO:…
Bioplex	MIP1alfa	FALSE	cytokines	TRUE	CCL3	P10147	P10147	P10147	CCL3_HUMAN	C-C motif chemokine 3 (G0/G1 switch regulatory protein 19-1) (Macrophage inflammatory protein 1-alpha) (MIP-1-alpha) (PAT 464.1) (SIS-beta) (Small-inducible cytokine A3) (Tonsillar lymphocyte LD78 alpha protein) [Cleaved into: MIP-1-alpha(4-69) (LD78-alpha(4-69))]	92	3D-structure;Chemotaxis;Cytokine;Direct protein sequencing;Disulfide bond;Inflammatory response;Reference proteome;Secreted;Signal	astrocyte cell migration [GO:0043615]; calcium ion transport [GO:0006816]; calcium-mediated signaling [GO:0019722]; cell activation [GO:0001775]; cell-cell signaling [GO:0007267]; cellular response to interleukin-1 [GO:0071347]; cellular response to tumor necrosis factor [GO:0071356]; cellular response to type II interferon [GO:0071346]; chemokine-mediated signaling pathway [GO:0070098]; chemotax…
Bioplex	MIP1delta	FALSE	cytokines	TRUE	CCL15	Q16663	Q16663	Q16663	CCL15_HUMAN	C-C motif chemokine 15 (Chemokine CC-2) (HCC-2) (Leukotactin-1) (LKN-1) (MIP-1 delta) (Macrophage inflammatory protein 5) (MIP-5) (Mrp-2b) (NCC-3) (Small-inducible cytokine A15) [Cleaved into: CCL15(22-92); CCL15(25-92); CCL15(29-92)]	113	3D-structure;Chemotaxis;Cytokine;Direct protein sequencing;Disulfide bond;Heparin-binding;Reference proteome;Secreted;Signal	cell-cell signaling [GO:0007267]; cellular response to interleukin-1 [GO:0071347]; cellular response to tumor necrosis factor [GO:0071356]; cellular response to type II interferon [GO:0071346]; chemokine-mediated signaling pathway [GO:0070098]; chemotaxis [GO:0006935]; eosinophil chemotaxis [GO:0048245]; G protein-coupled receptor signaling pathway [GO:0007186]; inflammatory response [GO:0006954]…
Bioplex	MIP3alfa	FALSE	cytokines	TRUE	CCL20	P78556	P78556	P78556	CCL20_HUMAN	C-C motif chemokine 20 (Beta-chemokine exodus-1) (CC chemokine LARC) (Liver and activation-regulated chemokine) (Macrophage inflammatory protein 3 alpha) (MIP-3-alpha) (Small-inducible cytokine A20) [Cleaved into: CCL20(1-67); CCL20(1-64); CCL20(2-70)]	96	3D-structure;Alternative splicing;Antibiotic;Antimicrobial;Chemotaxis;Cytokine;Direct protein sequencing;Disulfide bond;Inflammatory response;Reference proteome;Secreted;Signal	calcium-mediated signaling using intracellular calcium source [GO:0035584]; cell chemotaxis [GO:0060326]; cell-cell signaling [GO:0007267]; cellular response to interleukin-1 [GO:0071347]; cellular response to tumor necrosis factor [GO:0071356]; cellular response to type II interferon [GO:0071346]; chemokine-mediated signaling pathway [GO:0070098]; chemotaxis [GO:0006935]; defense response to bac…
Bioplex	MIP3beta	FALSE	cytokines	TRUE	CCL19	Q99731	Q99731	Q99731	CCL19_HUMAN	C-C motif chemokine 19 (Beta-chemokine exodus-3) (CK beta-11) (Epstein-Barr virus-induced molecule 1 ligand chemokine) (EBI1 ligand chemokine) (ELC) (Macrophage inflammatory protein 3 beta) (MIP-3-beta) (Small-inducible cytokine A19)	98	3D-structure;Chemotaxis;Cytokine;Direct protein sequencing;Disulfide bond;Inflammatory response;Reference proteome;Secreted;Signal	cell communication [GO:0007154]; cell maturation [GO:0048469]; cellular response to interleukin-1 [GO:0071347]; cellular response to tumor necrosis factor [GO:0071356]; cellular response to type II interferon [GO:0071346]; cellular response to virus [GO:0098586]; chemokine-mediated signaling pathway [GO:0070098]; dendritic cell chemotaxis [GO:0002407]; establishment of T cell polarity [GO:0001768…
Bioplex	MPIF1	FALSE	cytokines	TRUE	CCL23	P55773	P55773	P55773	CCL23_HUMAN	C-C motif chemokine 23 (CK-beta-8) (CKB-8) (Macrophage inflammatory protein 3) (MIP-3) (Myeloid progenitor inhibitory factor 1) (MPIF-1) (Small-inducible cytokine A23) [Cleaved into: CCL23(19-99); CCL23(22-99); CCL23(27-99); CCL23(30-99)]	120	3D-structure;Alternative splicing;Chemotaxis;Cytokine;Direct protein sequencing;Disulfide bond;Heparin-binding;Inflammatory response;Reference proteome;Secreted;Signal	cell-cell signaling [GO:0007267]; cellular response to interleukin-1 [GO:0071347]; cellular response to tumor necrosis factor [GO:0071356]; cellular response to type II interferon [GO:0071346]; chemokine-mediated signaling pathway [GO:0070098]; chemotaxis [GO:0006935]; eosinophil chemotaxis [GO:0048245]; G protein-coupled receptor signaling pathway [GO:0007186]; immune response [GO:0006955]; infl…
Bioplex	SCYB16	FALSE	cytokines	TRUE	CXCL16	Q9H2A7	Q9H2A7	Q9H2A7	CXL16_HUMAN	C-X-C motif chemokine 16 (Scavenger receptor for phosphatidylserine and oxidized low density lipoprotein) (SR-PSOX) (Small-inducible cytokine B16) (Transmembrane chemokine CXCL16)	254	Cell membrane;Chemotaxis;Cytokine;Disulfide bond;Glycoprotein;Membrane;Reference proteome;Secreted;Signal;Transmembrane;Transmembrane helix	chemotaxis [GO:0006935]; positive regulation of cell growth [GO:0030307]; positive regulation of cell migration [GO:0030335]; receptor-mediated endocytosis [GO:0006898]; response to cytokine [GO:0034097]; response to tumor necrosis factor [GO:0034612]; response to type II interferon [GO:0034341]; T cell chemotaxis [GO:0010818]
Bioplex	SDF1	FALSE	cytokines	TRUE	CXCL12	P48061	P48061	P48061	SDF1_HUMAN	Stromal cell-derived factor 1 (SDF-1) (hSDF-1) (C-X-C motif chemokine 12) (Intercrine reduced in hepatomas) (IRH) (hIRH) (Pre-B cell growth-stimulating factor) (PBSF) [Cleaved into: SDF-1-beta(3-72); SDF-1-alpha(3-67)]	93	3D-structure;Alternative splicing;Chemotaxis;Cytokine;Disulfide bond;Growth factor;Host-virus interaction;Reference proteome;Secreted;Signal	adult locomotory behavior [GO:0008344]; animal organ regeneration [GO:0031100]; axon guidance [GO:0007411]; blood circulation [GO:0008015]; cell adhesion [GO:0007155]; cell chemotaxis [GO:0060326]; cellular response to chemokine [GO:1990869]; chemokine (C-X-C motif) ligand 12 signaling pathway [GO:0038146]; chemokine-mediated signaling pathway [GO:0070098]; chemotaxis [GO:0006935]; defense respon…
Bioplex	TARC	FALSE	cytokines	TRUE	CCL17	Q92583	Q92583	Q92583	CCL17_HUMAN	C-C motif chemokine 17 (CC chemokine TARC) (Small-inducible cytokine A17) (Thymus and activation-regulated chemokine)	94	3D-structure;Chemotaxis;Cytokine;Direct protein sequencing;Disulfide bond;Inflammatory response;Reference proteome;Secreted;Signal	cell-cell signaling [GO:0007267]; cellular response to interleukin-1 [GO:0071347]; cellular response to tumor necrosis factor [GO:0071356]; cellular response to type II interferon [GO:0071346]; chemokine-mediated signaling pathway [GO:0070098]; chemotaxis [GO:0006935]; G protein-coupled receptor signaling pathway [GO:0007186]; inflammatory response [GO:0006954]; lymphocyte chemotaxis [GO:0048247]…
Bioplex	TECK	FALSE	cytokines	TRUE	CCL25	O15444	O15444	O15444	CCL25_HUMAN	C-C motif chemokine 25 (Chemokine TECK) (Small-inducible cytokine A25) (Thymus-expressed chemokine)	150	Alternative splicing;Chemotaxis;Cytokine;Disulfide bond;Inflammatory response;Reference proteome;Secreted;Signal	cell chemotaxis [GO:0060326]; cell surface receptor signaling pathway [GO:0007166]; cellular response to interleukin-1 [GO:0071347]; cellular response to tumor necrosis factor [GO:0071356]; cellular response to type II interferon [GO:0071346]; chemokine-mediated signaling pathway [GO:0070098]; chemotaxis [GO:0006935]; eosinophil chemotaxis [GO:0048245]; G protein-coupled receptor signaling pathwa…
Bioplex	TNFalfa	FALSE	cytokines	TRUE	TNF	P01375	P01375	P01375	TNFA_HUMAN	Tumor necrosis factor (Cachectin) (TNF-alpha) (Tumor necrosis factor ligand superfamily member 2) (TNF-a) [Cleaved into: Tumor necrosis factor, membrane form (N-terminal fragment) (NTF); Intracellular domain 1 (ICD1); Intracellular domain 2 (ICD2); C-domain 1; C-domain 2; Tumor necrosis factor, soluble form]	233	3D-structure;Cell membrane;Cytokine;Direct protein sequencing;Disulfide bond;Glycoprotein;Lipoprotein;Membrane;Myristate;Phosphoprotein;Reference proteome;Secreted;Signal-anchor;Transmembrane;Transmembrane helix	activation of cysteine-type endopeptidase activity involved in apoptotic process [GO:0006919]; antiviral innate immune response [GO:0140374]; astrocyte activation [GO:0048143]; calcium-mediated signaling [GO:0019722]; canonical NF-kappaB signal transduction [GO:0007249]; cellular response to amino acid stimulus [GO:0071230]; cellular response to amyloid-beta [GO:1904646]; cellular response to lip…
Bioplex	FGFb	FALSE	acute phase proteins	TRUE	FGF2	P09038	P09038	P09038	FGF2_HUMAN	Fibroblast growth factor 2 (FGF-2) (Basic fibroblast growth factor) (bFGF) (Heparin-binding growth factor 2) (HBGF-2)	288	3D-structure;Alternative initiation;Angiogenesis;Developmental protein;Differentiation;Direct protein sequencing;Growth factor;Heparin-binding;Isopeptide bond;Methylation;Mitogen;Nucleus;Phosphoprotein;Reference proteome;Secreted;Ubl conjugation	angiogenesis involved in coronary vascular morphogenesis [GO:0060978]; animal organ morphogenesis [GO:0009887]; branching involved in ureteric bud morphogenesis [GO:0001658]; canonical Wnt signaling pathway [GO:0060070]; cell differentiation [GO:0030154]; cell migration involved in sprouting angiogenesis [GO:0002042]; cellular response to mechanical stimulus [GO:0071260]; cerebellar granule cell …
Bioplex	PDGFbb	FALSE	acute phase proteins	TRUE	PDGFB	P01127	P01127	P01127	PDGFB_HUMAN	Platelet-derived growth factor subunit B (PDGF subunit B) (PDGF-2) (Platelet-derived growth factor B chain) (Platelet-derived growth factor beta polypeptide) (Proto-oncogene c-Sis) (Becaplermin)	241	3D-structure;Alternative promoter usage;Chromosomal rearrangement;Cleavage on pair of basic residues;Developmental protein;Direct protein sequencing;Disease variant;Disulfide bond;Glycoprotein;Growth factor;Mitogen;Pharmaceutical;Proto-oncogene;Reference proteome;Secreted;Signal	cell chemotaxis [GO:0060326]; cellular response to growth factor stimulus [GO:0071363]; cellular response to mycophenolic acid [GO:0071506]; cellular response to platelet-derived growth factor stimulus [GO:0036120]; embryonic placenta development [GO:0001892]; gene expression [GO:0010467]; heart development [GO:0007507]; interleukin-18-mediated signaling pathway [GO:0035655]; metanephric glomerul…
Bioplex	MIP1beta	FALSE	cytokines	TRUE	CCL4	P13236	P13236	P13236	CCL4_HUMAN	C-C motif chemokine 4 (G-26 T-lymphocyte-secreted protein) (HC21) (Lymphocyte activation gene 1 protein) (LAG-1) (MIP-1-beta(1-69)) (Macrophage inflammatory protein 1-beta) (MIP-1-beta) (PAT 744) (Protein H400) (SIS-gamma) (Small-inducible cytokine A4) (T-cell activation protein 2) (ACT-2) [Cleaved into: MIP-1-beta(3-69)]	92	3D-structure;Chemotaxis;Cytokine;Disulfide bond;Inflammatory response;Reference proteome;Secreted;Signal	cell adhesion [GO:0007155]; cell-cell signaling [GO:0007267]; cellular response to interleukin-1 [GO:0071347]; cellular response to tumor necrosis factor [GO:0071356]; cellular response to type II interferon [GO:0071346]; chemokine-mediated signaling pathway [GO:0070098]; eosinophil chemotaxis [GO:0048245]; establishment or maintenance of cell polarity [GO:0007163]; G protein-coupled receptor sig…
Bioplex	RANTES	FALSE	cytokines	TRUE	CCL5	P13501	P13501	P13501	CCL5_HUMAN	C-C motif chemokine 5 (EoCP) (Eosinophil chemotactic cytokine) (SIS-delta) (Small-inducible cytokine A5) (T cell-specific protein P228) (TCP228) (T-cell-specific protein RANTES) [Cleaved into: RANTES(3-68); RANTES(4-68)]	91	3D-structure;Chemotaxis;Cytokine;Direct protein sequencing;Disulfide bond;Glycoprotein;Inflammatory response;Oxidation;Reference proteome;Secreted;Signal	activation of phospholipase D activity [GO:0031584]; calcium ion transport [GO:0006816]; cell-cell signaling [GO:0007267]; cellular response to fibroblast growth factor stimulus [GO:0044344]; cellular response to interleukin-1 [GO:0071347]; cellular response to tumor necrosis factor [GO:0071356]; cellular response to type II interferon [GO:0071346]; cellular response to virus [GO:0098586]; chemok…
Bioplex	Ferritin	FALSE	cytokines	TRUE	FTH1	P02794	P02794	P02794	FRIH_HUMAN	Ferritin heavy chain (Ferritin H subunit) (EC 1.16.3.1) (Cell proliferation-inducing gene 15 protein) [Cleaved into: Ferritin heavy chain, N-terminally processed]	183	3D-structure;Acetylation;Cytoplasm;Iron;Iron storage;Metal-binding;Oxidoreductase;Phosphoprotein;Reference proteome	immune response [GO:0006955]; intracellular iron ion homeostasis [GO:0006879]; intracellular sequestering of iron ion [GO:0006880]; iron ion transport [GO:0006826]; negative regulation of cell population proliferation [GO:0008285]; negative regulation of fibroblast proliferation [GO:0048147]
Bioplex	Ferritin	FALSE	acute phase proteins	FALSE	FTL	P02792	P02792	P02792	FRIL_HUMAN	Ferritin light chain (Ferritin L subunit)	175	3D-structure;Acetylation;Cataract;Direct protein sequencing;Disease variant;Iron;Iron storage;Metal-binding;Neurodegeneration;Reference proteome	intracellular iron ion homeostasis [GO:0006879]; intracellular sequestering of iron ion [GO:0006880]; iron ion transport [GO:0006826]
Bioplex	Fibrinogen	TRUE	acute phase proteins	TRUE	FGA	P02671	P02671	P02671	FIBA_HUMAN	Fibrinogen alpha chain [Cleaved into: Fibrinopeptide A; Fibrinogen alpha chain]	866	3D-structure;Adaptive immunity;Alternative splicing;Amyloid;Amyloidosis;Blood coagulation;Calcium;Coiled coil;Direct protein sequencing;Disease variant;Disulfide bond;Glycoprotein;Hemostasis;Hydroxylation;Immunity;Innate immunity;Isopeptide bond;Metal-binding;Phosphoprotein;Reference proteome;Secreted;Signal	adaptive immune response [GO:0002250]; blood coagulation, common pathway [GO:0072377]; blood coagulation, fibrin clot formation [GO:0072378]; cell-matrix adhesion [GO:0007160]; fibrinolysis [GO:0042730]; induction of bacterial agglutination [GO:0043152]; innate immune response [GO:0045087]; negative regulation of endothelial cell apoptotic process [GO:2000352]; negative regulation of extrinsic ap…
Bioplex	Fibrinogen	TRUE	acute phase proteins	FALSE	FGB	P02675	P02675	P02675	FIBB_HUMAN	Fibrinogen beta chain [Cleaved into: Fibrinopeptide B; Fibrinogen beta chain]	491	3D-structure;Adaptive immunity;Blood coagulation;Coiled coil;Direct protein sequencing;Disease variant;Disulfide bond;Glycoprotein;Hemostasis;Immunity;Innate immunity;Pyrrolidone carboxylic acid;Reference proteome;Secreted;Signal	adaptive immune response [GO:0002250]; blood coagulation, fibrin clot formation [GO:0072378]; cell-matrix adhesion [GO:0007160]; cellular response to interleukin-1 [GO:0071347]; cellular response to leptin stimulus [GO:0044320]; fibrinolysis [GO:0042730]; induction of bacterial agglutination [GO:0043152]; innate immune response [GO:0045087]; negative regulation of endothelial cell apoptotic proce…
Bioplex	Fibrinogen	TRUE	acute phase proteins	FALSE	FGG	P02679	P02679	P02679	FIBG_HUMAN	Fibrinogen gamma chain	453	3D-structure;Alternative splicing;Blood coagulation;Calcium;Coiled coil;Direct protein sequencing;Disease variant;Disulfide bond;Glycoprotein;Hemostasis;Isopeptide bond;Metal-binding;Phosphoprotein;Reference proteome;Secreted;Signal;Sulfation	blood coagulation, fibrin clot formation [GO:0072378]; cell-matrix adhesion [GO:0007160]; cellular response to interleukin-1 [GO:0071347]; cellular response to interleukin-6 [GO:0071354]; fibrinolysis [GO:0042730]; negative regulation of endothelial cell apoptotic process [GO:2000352]; negative regulation of extrinsic apoptotic signaling pathway via death domain receptors [GO:1902042]; plasminoge…
Bioplex	Procalcitonin	FALSE	acute phase proteins	TRUE	CALCA	P06881	P06881	P06881	CALCA_HUMAN	Calcitonin gene-related peptide 1 (Alpha-type CGRP) (Calcitonin gene-related peptide I) (CGRP-I)	128	3D-structure;Alternative splicing;Amidation;Cleavage on pair of basic residues;Direct protein sequencing;Disulfide bond;Hormone;Reference proteome;Secreted;Signal	activation of adenylate cyclase activity [GO:0007190]; adenylate cyclase-activating G protein-coupled receptor signaling pathway [GO:0007189]; amylin receptor signaling pathway [GO:0097647]; calcitonin gene-related peptide receptor signaling pathway [GO:1990408]; cell-cell signaling [GO:0007267]; endothelial cell migration [GO:0043542]; endothelial cell proliferation [GO:0001935]; G protein-coupl…
Bioplex	SAA	TRUE	acute phase proteins	TRUE	SAA1	P0DJI8	P0DJI8	P0DJI8	SAA1_HUMAN	Serum amyloid A-1 protein (SAA) [Cleaved into: Amyloid protein A (Amyloid fibril protein AA); Serum amyloid protein A(2-104); Serum amyloid protein A(3-104); Serum amyloid protein A(2-103); Serum amyloid protein A(2-102); Serum amyloid protein A(4-101)]	122	3D-structure;Acute phase;Amyloid;Amyloidosis;Direct protein sequencing;HDL;Heparin-binding;Methylation;Reference proteome;Secreted;Signal	acute-phase response [GO:0006953]; lymphocyte chemotaxis [GO:0048247]; macrophage chemotaxis [GO:0048246]; negative regulation of inflammatory response [GO:0050728]; neutrophil chemotaxis [GO:0030593]; platelet activation [GO:0030168]; positive regulation of cell adhesion [GO:0045785]; positive regulation of cytokine production [GO:0001819]; positive regulation of cytosolic calcium ion concentrat…
Bioplex	SAA	TRUE	acute phase proteins	FALSE	SAA2	P0DJI9	P0DJI9	P0DJI9	SAA2_HUMAN	Serum amyloid A-2 protein (SAA2) [Cleaved into: Amyloid A2 protein (AA2)]	122	Acute phase;Alternative splicing;Amyloid;Amyloidosis;Direct protein sequencing;HDL;Reference proteome;Secreted;Signal	acute-phase response [GO:0006953]
Bioplex	SAA	TRUE	acute phase proteins	FALSE	SAA4	P35542	P35542	P35542	SAA4_HUMAN	Serum amyloid A-4 protein (Constitutively expressed serum amyloid A protein) (C-SAA)	130	Acute phase;Direct protein sequencing;Glycoprotein;HDL;Reference proteome;Secreted;Signal	acute-phase response [GO:0006953]
Bioplex	TPA	FALSE	acute phase proteins	TRUE	PLAT	P00750	P00750	P00750	TPA_HUMAN	Tissue-type plasminogen activator (t-PA) (t-plasminogen activator) (tPA) (EC 3.4.21.68) (Alteplase) (Reteplase) [Cleaved into: Tissue-type plasminogen activator chain A; Tissue-type plasminogen activator chain B]	562	3D-structure;Alternative splicing;Cleavage on pair of basic residues;Direct protein sequencing;Disulfide bond;EGF-like domain;Glycoprotein;Hydrolase;Kringle;Pharmaceutical;Plasminogen activation;Protease;Reference proteome;Repeat;Secreted;Serine protease;Signal;Zymogen	blood coagulation [GO:0007596]; fibrinolysis [GO:0042730]; negative regulation of fibrinolysis [GO:0051918]; negative regulation of plasminogen activation [GO:0010757]; negative regulation of proteolysis [GO:0045861]; plasminogen activation [GO:0031639]; platelet-derived growth factor receptor signaling pathway [GO:0048008]; prevention of polyspermy [GO:0060468]; protein modification process [GO:…
Bioplex	a2Macroglobulin	TRUE	acute phase proteins	TRUE	A2M	P01023	P01023	P01023	A2MG_HUMAN	Alpha-2-macroglobulin (Alpha-2-M) (C3 and PZP-like alpha-2-macroglobulin domain-containing protein 5)	1474	3D-structure;Bait region;Direct protein sequencing;Disulfide bond;Glycoprotein;Isopeptide bond;Protease inhibitor;Reference proteome;Secreted;Serine protease inhibitor;Signal;Thioester bond	acute inflammatory response to antigenic stimulus [GO:0002438]; acute-phase response [GO:0006953]; embryonic liver development [GO:1990402]; luteinization [GO:0001553]; negative regulation of complement activation, lectin pathway [GO:0001869]; response to carbon dioxide [GO:0010037]; response to glucocorticoid [GO:0051384]; response to nutrient [GO:0007584]; response to prostaglandin E [GO:003469…
Bioplex	CRP	TRUE	acute phase proteins	TRUE	CRP	P02741	P02741	P02741	CRP_HUMAN	C-reactive protein [Cleaved into: C-reactive protein(1-205)]	224	3D-structure;Acute phase;Alternative splicing;Calcium;Direct protein sequencing;Disulfide bond;Metal-binding;Pyrrolidone carboxylic acid;Reference proteome;Secreted;Signal	acute-phase response [GO:0006953]; defense response to Gram-positive bacterium [GO:0050830]; inflammatory response [GO:0006954]; innate immune response [GO:0045087]; negative regulation of lipid storage [GO:0010888]; negative regulation of macrophage derived foam cell differentiation [GO:0010745]; negative regulation of mononuclear cell proliferation [GO:0032945]; opsonization [GO:0008228]; posit…
Bioplex	SAP	TRUE	acute phase proteins	TRUE	APCS	P02743	P02743	P02743	SAMP_HUMAN	Serum amyloid P-component (SAP) (9.5S alpha-1-glycoprotein) [Cleaved into: Serum amyloid P-component(1-203)]	223	3D-structure;Amyloid;Calcium;Direct protein sequencing;Disulfide bond;Glycoprotein;Lectin;Metal-binding;Reference proteome;Secreted;Signal	acute-phase response [GO:0006953]; chaperone-mediated protein complex assembly [GO:0051131]; innate immune response [GO:0045087]; negative regulation by host of viral exo-alpha-sialidase activity [GO:0044869]; negative regulation by host of viral glycoprotein metabolic process [GO:0044871]; negative regulation of acute inflammatory response [GO:0002674]; negative regulation of exo-alpha-sialidase…

## Sheet: Table S1 (printable version)
Table S1. Identified proteins by method information based on UNIPROT
Method	Protein group	Gene	Both Methods	Type	UNIPROT	Entry Name	Protein name	Length	Keywords	Gene Ontology (biological process)
LC-MS/MS	IGLV4-69	IGLV4-69		Ig peptide	A0A075B6H9	LV469_HUMAN	Immunoglobulin lambda variable 4-69	119	Adaptive immunity;Cell membrane;Disulfide bond;Immunity;Immunoglobulin;Immunoglobulin domain;Membrane;Reference proteome;Secreted;Signal	adaptive immune response [GO:0002250]; immune response [GO:0006955]
LC-MS/MS	IGLV8-61	IGLV8-61		Ig peptide	A0A075B6I0	LV861_HUMAN	Immunoglobulin lambda variable 8-61	122	Adaptive immunity;Cell membrane;Disulfide bond;Immunity;Immunoglobulin;Immunoglobulin domain;Membrane;Reference proteome;Secreted;Signal	adaptive immune response [GO:0002250]; immune response [GO:0006955]
LC-MS/MS	IGLV7-46	IGLV7-46		Ig peptide	A0A075B6I9	LV746_HUMAN	Immunoglobulin lambda variable 7-46	117	Adaptive immunity;Cell membrane;Disulfide bond;Immunity;Immunoglobulin;Immunoglobulin domain;Membrane;Reference proteome;Secreted;Signal	adaptive immune response [GO:0002250]; immune response [GO:0006955]
LC-MS/MS	IGLV5-37	IGLV5-37		Ig peptide	A0A075B6J1	LV537_HUMAN	Immunoglobulin lambda variable 5-37	123	Adaptive immunity;Cell membrane;Disulfide bond;Immunity;Immunoglobulin;Immunoglobulin domain;Membrane;Reference proteome;Secreted;Signal	adaptive immune response [GO:0002250]; immune response [GO:0006955]
LC-MS/MS	IGLV2-18	IGLV2-18		Ig peptide	A0A075B6J9	LV218_HUMAN	Immunoglobulin lambda variable 2-18	118	Adaptive immunity;Cell membrane;Disulfide bond;Immunity;Immunoglobulin;Immunoglobulin domain;Membrane;Pyrrolidone carboxylic acid;Reference proteome;Secreted;Signal	adaptive immune response [GO:0002250]; immune response [GO:0006955]
LC-MS/MS	IGLV3-16	IGLV3-16		Ig peptide	A0A075B6K0	LV316_HUMAN	Immunoglobulin lambda variable 3-16	115	Adaptive immunity;Cell membrane;Disulfide bond;Immunity;Immunoglobulin;Immunoglobulin domain;Membrane;Reference proteome;Secreted;Signal	adaptive immune response [GO:0002250]; immune response [GO:0006955]
LC-MS/MS	IGLV3-12	IGLV3-12		Ig peptide	A0A075B6K2	LV312_HUMAN	Immunoglobulin lambda variable 3-12	115	Adaptive immunity;Cell membrane;Disulfide bond;Immunity;Immunoglobulin;Immunoglobulin domain;Membrane;Reference proteome;Secreted;Signal	adaptive immune response [GO:0002250]; immune response [GO:0006955]
LC-MS/MS	IGLV3-10	IGLV3-10		Ig peptide	A0A075B6K4	LV310_HUMAN	Immunoglobulin lambda variable 3-10	115	Adaptive immunity;Cell membrane;Disulfide bond;Immunity;Immunoglobulin;Immunoglobulin domain;Membrane;Reference proteome;Secreted;Signal	adaptive immune response [GO:0002250]; immune response [GO:0006955]
LC-MS/MS	IGLV3-9	IGLV3-9		Ig peptide	A0A075B6K5	LV39_HUMAN	Immunoglobulin lambda variable 3-9	115	Adaptive immunity;Cell membrane;Disulfide bond;Immunity;Immunoglobulin;Immunoglobulin domain;Membrane;Reference proteome;Secreted;Signal	adaptive immune response [GO:0002250]; immune response [GO:0006955]
LC-MS/MS	IGKV2[D]-28	IGKV2-28		Ig peptide	A0A075B6P5	KV228_HUMAN	Immunoglobulin kappa variable 2-28	120	Adaptive immunity;Cell membrane;Disulfide bond;Immunity;Immunoglobulin;Immunoglobulin domain;Membrane;Reference proteome;Secreted;Signal	adaptive immune response [GO:0002250]; immune response [GO:0006955]
LC-MS/MS		IGKV2D-28		Ig peptide	P01615	KVD28_HUMAN	Immunoglobulin kappa variable 2D-28	120	Adaptive immunity;Cell membrane;Direct protein sequencing;Disulfide bond;Immunity;Immunoglobulin;Immunoglobulin domain;Membrane;Reference proteome;Secreted;Signal	adaptive immune response [GO:0002250]; immune response [GO:0006955]
LC-MS/MS	IGHV3-64	IGHV3-64		Ig peptide	A0A075B6Q5	HV364_HUMAN	Immunoglobulin heavy variable 3-64	118	Adaptive immunity;Cell membrane;Disulfide bond;Immunity;Immunoglobulin;Immunoglobulin domain;Membrane;Reference proteome;Secreted;Signal	immunoglobulin mediated immune response [GO:0016064]
LC-MS/MS	IGHV4-4	IGHV4-4		Ig peptide	A0A075B6R2	HV404_HUMAN	Immunoglobulin heavy variable 4-4	117	Adaptive immunity;Cell membrane;Disulfide bond;Immunity;Immunoglobulin;Immunoglobulin domain;Membrane;Reference proteome;Secreted;Signal	immunoglobulin mediated immune response [GO:0016064]
LC-MS/MS	IGKV2[D]-29	IGKV2D-29		Ig peptide	A0A075B6S2	KVD29_HUMAN	Immunoglobulin kappa variable 2D-29	120	Adaptive immunity;Cell membrane;Disulfide bond;Immunity;Immunoglobulin;Immunoglobulin domain;Membrane;Reference proteome;Secreted;Signal	adaptive immune response [GO:0002250]; immune response [GO:0006955]
LC-MS/MS		IGKV2D-26		Ig peptide	A0A0A0MRZ7	KVD26_HUMAN	Immunoglobulin kappa variable 2D-26	120	Adaptive immunity;Cell membrane;Disulfide bond;Immunity;Immunoglobulin;Immunoglobulin domain;Membrane;Reference proteome;Secreted;Signal	adaptive immune response [GO:0002250]; immune response [GO:0006955]
LC-MS/MS	IGKV1-27	IGKV1-27		Ig peptide	A0A075B6S5	KV127_HUMAN	Immunoglobulin kappa variable 1-27	117	Adaptive immunity;Cell membrane;Disulfide bond;Immunity;Immunoglobulin;Immunoglobulin domain;Membrane;Reference proteome;Secreted;Signal	adaptive immune response [GO:0002250]; immune response [GO:0006955]
LC-MS/MS	IGKV2[D]-40	IGKV2-40		Ig peptide	A0A087WW87	KV240_HUMAN	Immunoglobulin kappa variable 2-40	121	Adaptive immunity;Cell membrane;Disulfide bond;Immunity;Immunoglobulin;Immunoglobulin domain;Membrane;Reference proteome;Secreted;Signal	adaptive immune response [GO:0002250]; immune response [GO:0006955]
LC-MS/MS		IGKV2D-40		Ig peptide	P01614	KVD40_HUMAN	Immunoglobulin kappa variable 2D-40	121	Adaptive immunity;Cell membrane;Direct protein sequencing;Disulfide bond;Immunity;Immunoglobulin;Immunoglobulin domain;Membrane;Reference proteome;Secreted;Signal	adaptive immune response [GO:0002250]; immune response [GO:0006955]
LC-MS/MS	IGHV3-49	IGHV3-49		Ig peptide	A0A0A0MS15	HV349_HUMAN	Immunoglobulin heavy variable 3-49	119	Adaptive immunity;Cell membrane;Disulfide bond;Immunity;Immunoglobulin;Immunoglobulin domain;Membrane;Reference proteome;Secreted;Signal	immunoglobulin mediated immune response [GO:0016064]
LC-MS/MS	IGKV6D-21	IGKV6D-21		Ig peptide	A0A0A0MT36	KVD21_HUMAN	Immunoglobulin kappa variable 6D-21	114	Adaptive immunity;Cell membrane;Disulfide bond;Immunity;Immunoglobulin;Immunoglobulin domain;Membrane;Reference proteome;Secreted;Signal	adaptive immune response [GO:0002250]; immune response [GO:0006955]
LC-MS/MS	IGLV1-36	IGLV1-36		Ig peptide	A0A0B4J1U3	LV136_HUMAN	Immunoglobulin lambda variable 1-36	117	3D-structure;Adaptive immunity;Cell membrane;Disulfide bond;Immunity;Immunoglobulin;Immunoglobulin domain;Membrane;Reference proteome;Secreted;Signal	adaptive immune response [GO:0002250]; immune response [GO:0006955]
LC-MS/MS	IGHV6-1	IGHV6-1		Ig peptide	A0A0B4J1U7	HV601_HUMAN	Immunoglobulin heavy variable 6-1	121	Adaptive immunity;Cell membrane;Disulfide bond;Immunity;Immunoglobulin;Immunoglobulin domain;Membrane;Reference proteome;Secreted;Signal	immunoglobulin mediated immune response [GO:0016064]
LC-MS/MS	IGHV3-15	IGHV3-15		Ig peptide	A0A0B4J1V0	HV315_HUMAN	Immunoglobulin heavy variable 3-15	119	Adaptive immunity;Cell membrane;Disulfide bond;Immunity;Immunoglobulin;Immunoglobulin domain;Membrane;Reference proteome;Secreted;Signal	immunoglobulin mediated immune response [GO:0016064]
LC-MS/MS	IGHV3-[11,21,48]	IGHV3-21		Ig peptide	A0A0B4J1V1	HV321_HUMAN	Immunoglobulin heavy variable 3-21	117	3D-structure;Adaptive immunity;Cell membrane;Disease variant;Disulfide bond;Immunity;Immunoglobulin;Immunoglobulin domain;Membrane;Reference proteome;Secreted;Signal	immunoglobulin mediated immune response [GO:0016064]
LC-MS/MS		IGHV3-48		Ig peptide	P01763	HV348_HUMAN	Immunoglobulin heavy variable 3-48	117	Adaptive immunity;Cell membrane;Direct protein sequencing;Disulfide bond;Immunity;Immunoglobulin;Immunoglobulin domain;Membrane;Reference proteome;Secreted;Signal	immune response [GO:0006955]; immunoglobulin mediated immune response [GO:0016064]
LC-MS/MS		IGHV3-11		Ig peptide	P01762	HV311_HUMAN	Immunoglobulin heavy variable 3-11	117	Adaptive immunity;Cell membrane;Direct protein sequencing;Disulfide bond;Immunity;Immunoglobulin;Immunoglobulin domain;Membrane;Pyrrolidone carboxylic acid;Reference proteome;Secreted;Signal	immune response [GO:0006955]; immunoglobulin mediated immune response [GO:0016064]
LC-MS/MS	IGHV2-26	IGHV2-26		Ig peptide	A0A0B4J1V2	HV226_HUMAN	Immunoglobulin heavy variable 2-26	119	Adaptive immunity;Cell membrane;Disulfide bond;Immunity;Immunoglobulin;Immunoglobulin domain;Membrane;Pyrrolidone carboxylic acid;Reference proteome;Secreted;Signal	immunoglobulin mediated immune response [GO:0016064]
LC-MS/MS	IGHV3-73	IGHV3-73		Ig peptide	A0A0B4J1V6	HV373_HUMAN	Immunoglobulin heavy variable 3-73	119	Adaptive immunity;Cell membrane;Disulfide bond;Immunity;Immunoglobulin;Immunoglobulin domain;Membrane;Reference proteome;Secreted;Signal	immunoglobulin mediated immune response [GO:0016064]
LC-MS/MS	IGHV3-74	IGHV3-74		Ig peptide	A0A0B4J1X5	HV374_HUMAN	Immunoglobulin heavy variable 3-74	117	Adaptive immunity;Cell membrane;Disulfide bond;Immunity;Immunoglobulin;Immunoglobulin domain;Membrane;Reference proteome;Secreted;Signal	immunoglobulin mediated immune response [GO:0016064]
LC-MS/MS	IGHV3-43	IGHV3-43		Ig peptide	A0A0B4J1X8	HV343_HUMAN	Immunoglobulin heavy variable 3-43	118	Adaptive immunity;Cell membrane;Disulfide bond;Immunity;Immunoglobulin;Immunoglobulin domain;Membrane;Reference proteome;Secreted;Signal	immunoglobulin mediated immune response [GO:0016064]
LC-MS/MS	IGLV9-49	IGLV9-49		Ig peptide	A0A0B4J1Y8	LV949_HUMAN	Immunoglobulin lambda variable 9-49	123	Adaptive immunity;Cell membrane;Disulfide bond;Immunity;Immunoglobulin;Immunoglobulin domain;Membrane;Phosphoprotein;Reference proteome;Secreted;Signal	adaptive immune response [GO:0002250]; immune response [GO:0006955]
LC-MS/MS	IGHV3-72	IGHV3-72		Ig peptide	A0A0B4J1Y9	HV372_HUMAN	Immunoglobulin heavy variable 3-72	119	Adaptive immunity;Cell membrane;Disulfide bond;Immunity;Immunoglobulin;Immunoglobulin domain;Membrane;Reference proteome;Secreted;Signal	immunoglobulin mediated immune response [GO:0016064]
LC-MS/MS	IGHV1-69D	IGHV1-69D		Ig peptide	A0A0B4J2H0	HV69D_HUMAN	Immunoglobulin heavy variable 1-69D	117	3D-structure;Adaptive immunity;Cell membrane;Disulfide bond;Immunity;Immunoglobulin;Immunoglobulin domain;Membrane;Pyrrolidone carboxylic acid;Reference proteome;Secreted;Signal	immunoglobulin mediated immune response [GO:0016064]
LC-MS/MS	IGKV6-21	IGKV6-21		Ig peptide	A0A0C4DH24	KV621_HUMAN	Immunoglobulin kappa variable 6-21	114	Adaptive immunity;Cell membrane;Disulfide bond;Immunity;Immunoglobulin;Immunoglobulin domain;Membrane;Reference proteome;Secreted;Signal	adaptive immune response [GO:0002250]; immune response [GO:0006955]
LC-MS/MS	IGHV1-3	IGHV1-3		Ig peptide	A0A0C4DH29	HV103_HUMAN	Immunoglobulin heavy variable 1-3	117	Adaptive immunity;Cell membrane;Disulfide bond;Immunity;Immunoglobulin;Immunoglobulin domain;Membrane;Reference proteome;Secreted;Signal	immunoglobulin mediated immune response [GO:0016064]
LC-MS/MS	IGHV1-18	IGHV1-18		Ig peptide	A0A0C4DH31	HV118_HUMAN	Immunoglobulin heavy variable 1-18	117	Adaptive immunity;Cell membrane;Disulfide bond;Immunity;Immunoglobulin;Immunoglobulin domain;Membrane;Reference proteome;Secreted;Signal	immunoglobulin mediated immune response [GO:0016064]
LC-MS/MS	IGHV3-20	IGHV3-20		Ig peptide	A0A0C4DH32	HV320_HUMAN	Immunoglobulin heavy variable 3-20	117	Adaptive immunity;Cell membrane;Disulfide bond;Immunity;Immunoglobulin;Immunoglobulin domain;Membrane;Reference proteome;Secreted;Signal	immunoglobulin mediated immune response [GO:0016064]
LC-MS/MS	IGHV1-24	IGHV1-24		Ig peptide	A0A0C4DH33	HV124_HUMAN	Immunoglobulin heavy variable 1-24	117	Adaptive immunity;Cell membrane;Disulfide bond;Immunity;Immunoglobulin;Immunoglobulin domain;Membrane;Reference proteome;Secreted;Signal	immunoglobulin mediated immune response [GO:0016064]
LC-MS/MS	IGHV4-28	IGHV4-28		Ig peptide	A0A0C4DH34	HV428_HUMAN	Immunoglobulin heavy variable 4-28	117	Adaptive immunity;Cell membrane;Disulfide bond;Immunity;Immunoglobulin;Immunoglobulin domain;Membrane;Reference proteome;Secreted;Signal	immunoglobulin mediated immune response [GO:0016064]
LC-MS/MS	IGHV5-51	IGHV5-51		Ig peptide	A0A0C4DH38	HV551_HUMAN	Immunoglobulin heavy variable 5-51	117	Adaptive immunity;Cell membrane;Disulfide bond;Immunity;Immunoglobulin;Immunoglobulin domain;Membrane;Reference proteome;Secreted;Signal	immunoglobulin mediated immune response [GO:0016064]
LC-MS/MS	IGHV1-58	IGHV1-58		Ig peptide	A0A0C4DH39	HV158_HUMAN	Immunoglobulin heavy variable 1-58	117	Adaptive immunity;Cell membrane;Disulfide bond;Immunity;Immunoglobulin;Immunoglobulin domain;Membrane;Reference proteome;Secreted;Signal	immunoglobulin mediated immune response [GO:0016064]
LC-MS/MS	IGHV3-[53,66]	IGHV3-66		Ig peptide	A0A0C4DH42	HV366_HUMAN	Immunoglobulin heavy variable 3-66	116	Adaptive immunity;Cell membrane;Disulfide bond;Immunity;Immunoglobulin;Immunoglobulin domain;Membrane;Reference proteome;Secreted;Signal	immunoglobulin mediated immune response [GO:0016064]
LC-MS/MS		IGHV3-53		Ig peptide	P01767	HV353_HUMAN	Immunoglobulin heavy variable 3-53	116	Adaptive immunity;Cell membrane;Direct protein sequencing;Disulfide bond;Immunity;Immunoglobulin;Immunoglobulin domain;Membrane;Reference proteome;Secreted;Signal	immune response [GO:0006955]; immunoglobulin mediated immune response [GO:0016064]
LC-MS/MS	IGHV2-70D	IGHV2-70D		Ig peptide	A0A0C4DH43	HV70D_HUMAN	Immunoglobulin heavy variable 2-70D	119	Adaptive immunity;Cell membrane;Disulfide bond;Immunity;Immunoglobulin;Immunoglobulin domain;Membrane;Pyrrolidone carboxylic acid;Reference proteome;Secreted;Signal	immunoglobulin mediated immune response [GO:0016064]
LC-MS/MS	IGKV1-[8,9]	IGKV1-8		Ig peptide	A0A0C4DH67	KV108_HUMAN	Immunoglobulin kappa variable 1-8	115	Adaptive immunity;Cell membrane;Disulfide bond;Immunity;Immunoglobulin;Immunoglobulin domain;Membrane;Reference proteome;Secreted;Signal	adaptive immune response [GO:0002250]; immune response [GO:0006955]
LC-MS/MS		IGKV1-9		Ig peptide	A0A0C4DH69	KV109_HUMAN	Immunoglobulin kappa variable 1-9	117	Adaptive immunity;Cell membrane;Disulfide bond;Immunity;Immunoglobulin;Immunoglobulin domain;Membrane;Reference proteome;Secreted;Signal	adaptive immune response [GO:0002250]; immune response [GO:0006955]
LC-MS/MS	IGKV2-24	IGKV2-24		Ig peptide	A0A0C4DH68	KV224_HUMAN	Immunoglobulin kappa variable 2-24	120	Adaptive immunity;Cell membrane;Disulfide bond;Immunity;Immunoglobulin;Immunoglobulin domain;Membrane;Reference proteome;Secreted;Signal	adaptive immune response [GO:0002250]; immune response [GO:0006955]
LC-MS/MS	IGHA2			Ig peptide	P0DOX2	IGA2_HUMAN	Immunoglobulin alpha-2 heavy chain	455	Adaptive immunity;Cell membrane;Direct protein sequencing;Disulfide bond;Glycoprotein;Immunity;Immunoglobulin;Immunoglobulin domain;Membrane;Repeat;Secreted	adaptive immune response [GO:0002250]
LC-MS/MS		IGHV7-4-1		Ig peptide	A0A0J9YVY3	HV741_HUMAN	Immunoglobulin heavy variable 7-4-1	117	Adaptive immunity;Cell membrane;Disulfide bond;Immunity;Immunoglobulin;Immunoglobulin domain;Membrane;Reference proteome;Secreted;Signal	immunoglobulin mediated immune response [GO:0016064]
LC-MS/MS		IGHA2		Ig peptide	P01877	IGHA2_HUMAN	Immunoglobulin heavy constant alpha 2	391	3D-structure;Adaptive immunity;Alternative splicing;Cell membrane;Direct protein sequencing;Disulfide bond;Glycoprotein;Immunity;Immunoglobulin;Immunoglobulin domain;Membrane;Reference proteome;Repeat;Secreted;Transmembrane;Transmembrane helix	adaptive immune response [GO:0002250]; antibacterial humoral response [GO:0019731]; B cell receptor signaling pathway [GO:0050853]; complement activation, classical pathway [GO:0006958]; glomerular filtration [GO:0003094]; immune response [GO:0006955]; positive regulation of respiratory burst [GO:0060267]; retina homeostasis [GO:0001895]
LC-MS/MS	IGHV3-64D	IGHV3-64D		Ig peptide	A0A0J9YX35	HV64D_HUMAN	Immunoglobulin heavy variable 3-64D	117	Adaptive immunity;Cell membrane;Disulfide bond;Immunity;Immunoglobulin;Immunoglobulin domain;Membrane;Reference proteome;Secreted;Signal	immunoglobulin mediated immune response [GO:0016064]
LC-MS/MS	IGHV5-10-1	IGHV5-10-1		Ig peptide	A0A0J9YXX1	HV5X1_HUMAN	Immunoglobulin heavy variable 5-10-1	117	Adaptive immunity;Cell membrane;Disulfide bond;Immunity;Immunoglobulin;Immunoglobulin domain;Membrane;Reference proteome;Secreted;Signal	immunoglobulin mediated immune response [GO:0016064]
LC-MS/MS	IGKV2-29	IGKV2-29		Ig peptide	A2NJV5	KV229_HUMAN	Immunoglobulin kappa variable 2-29	120	Adaptive immunity;Cell membrane;Disulfide bond;Immunity;Immunoglobulin;Immunoglobulin domain;Membrane;Reference proteome;Secreted;Signal	adaptive immune response [GO:0002250]; immune response [GO:0006955]
LC-MS/MS	ALB	ALB		Protein	P02768	ALBU_HUMAN	Albumin	609	3D-structure;Alternative splicing;Calcium;Cleavage on pair of basic residues;Copper;Direct protein sequencing;Disease variant;Disulfide bond;Glycation;Glycoprotein;Lipid-binding;Metal-binding;Methylation;Phosphoprotein;Reference proteome;Repeat;Secreted;Signal;Zinc	cellular response to starvation [GO:0009267]; maintenance of mitochondrion location [GO:0051659]; negative regulation of apoptotic process [GO:0043066]; negative regulation of programmed cell death [GO:0043069]; retina homeostasis [GO:0001895]
LC-MS/MS	KRT[1,2,6B,77]	KRT1		Protein	P04264	K2C1_HUMAN	Keratin, type II cytoskeletal 1	644	3D-structure;Cell membrane;Citrullination;Coiled coil;Cytoplasm;Direct protein sequencing;Disease variant;Ichthyosis;Intermediate filament;Keratin;Membrane;Methylation;Palmoplantar keratoderma;Phosphoprotein;Reference proteome	complement activation, lectin pathway [GO:0001867]; establishment of skin barrier [GO:0061436]; fibrinolysis [GO:0042730]; intermediate filament organization [GO:0045109]; keratinization [GO:0031424]; negative regulation of inflammatory response [GO:0050728]; peptide cross-linking [GO:0018149]; protein heterotetramerization [GO:0051290]; regulation of angiogenesis [GO:0045765]; response to oxidat…
LC-MS/MS		KRT6B		Protein	P04259	K2C6B_HUMAN	Keratin, type II cytoskeletal 6B	564	Acetylation;Coiled coil;Direct protein sequencing;Disease variant;Ectodermal dysplasia;Intermediate filament;Keratin;Palmoplantar keratoderma;Reference proteome	ectoderm development [GO:0007398]; intermediate filament organization [GO:0045109]; keratinization [GO:0031424]
LC-MS/MS		KRT77		Protein	Q7Z794	K2C1B_HUMAN	Keratin, type II cytoskeletal 1b	578	Citrullination;Coiled coil;Intermediate filament;Keratin;Methylation;Reference proteome	intermediate filament organization [GO:0045109]; keratinization [GO:0031424]
LC-MS/MS		KRT2		Protein	P35908	K22E_HUMAN	Keratin, type II cytoskeletal 2 epidermal	639	Coiled coil;Cytoplasm;Disease variant;Ichthyosis;Intermediate filament;Keratin;Methylation;Phosphoprotein;Reference proteome	epidermis development [GO:0008544]; intermediate filament organization [GO:0045109]; keratinization [GO:0031424]; keratinocyte activation [GO:0032980]; keratinocyte development [GO:0003334]; keratinocyte migration [GO:0051546]; keratinocyte proliferation [GO:0043616]; peptide cross-linking [GO:0018149]; positive regulation of epidermis development [GO:0045684]
LC-MS/MS	KRT[10-3;15,17,19,24-5;27-8;31-2;35-8]	KRT10		Protein	P13645	K1C10_HUMAN	Keratin, type I cytoskeletal 10	584	3D-structure;Coiled coil;Cytoplasm;Direct protein sequencing;Disease variant;Disulfide bond;Ichthyosis;Intermediate filament;Keratin;Phosphoprotein;Reference proteome;Secreted	epidermis development [GO:0008544]; epithelial cell differentiation [GO:0030855]; intermediate filament organization [GO:0045109]; keratinocyte differentiation [GO:0030216]; peptide cross-linking [GO:0018149]; positive regulation of epidermis development [GO:0045684]; protein heterotetramerization [GO:0051290]
LC-MS/MS		KRT19		Protein	P08727	K1C19_HUMAN	Keratin, type I cytoskeletal 19	400	Coiled coil;Direct protein sequencing;Host-virus interaction;Intermediate filament;Keratin;Methylation;Phosphoprotein;Reference proteome	cell differentiation involved in embryonic placenta development [GO:0060706]; epithelial cell differentiation [GO:0030855]; intermediate filament organization [GO:0045109]; Notch signaling pathway [GO:0007219]; response to estrogen [GO:0043627]; sarcomere organization [GO:0045214]
LC-MS/MS		KRT17		Protein	Q04695	K1C17_HUMAN	Keratin, type I cytoskeletal 17	432	Coiled coil;Cytoplasm;Disease variant;Ectodermal dysplasia;Intermediate filament;Isopeptide bond;Keratin;Palmoplantar keratoderma;Phosphoprotein;Reference proteome;Ubl conjugation	epithelial cell differentiation [GO:0030855]; hair follicle morphogenesis [GO:0031069]; intermediate filament organization [GO:0045109]; keratinization [GO:0031424]; positive regulation of cell growth [GO:0030307]; positive regulation of hair follicle development [GO:0051798]; positive regulation of translation [GO:0045727]
LC-MS/MS		KRT15		Protein	P19012	K1C15_HUMAN	Keratin, type I cytoskeletal 15	456	Alternative splicing;Coiled coil;Intermediate filament;Isopeptide bond;Keratin;Phosphoprotein;Reference proteome;Ubl conjugation	epidermis development [GO:0008544]; epithelial cell differentiation [GO:0030855]; intermediate filament organization [GO:0045109]
LC-MS/MS		KRT28		Protein	Q7Z3Y7	K1C28_HUMAN	Keratin, type I cytoskeletal 28	464	Coiled coil;Cytoplasm;Intermediate filament;Keratin;Reference proteome	epithelial cell differentiation [GO:0030855]; hair follicle morphogenesis [GO:0031069]; intermediate filament organization [GO:0045109]
LC-MS/MS		KRT31		Protein	Q15323	K1H1_HUMAN	Keratin, type I cuticular Ha1	416	Coiled coil;Intermediate filament;Keratin;Reference proteome	epidermis development [GO:0008544]; epithelial cell differentiation [GO:0030855]; intermediate filament organization [GO:0045109]
LC-MS/MS		KRT35		Protein	Q92764	KRT35_HUMAN	Keratin, type I cuticular Ha5	455	Coiled coil;Intermediate filament;Keratin;Reference proteome	anatomical structure morphogenesis [GO:0009653]; epithelial cell differentiation [GO:0030855]; intermediate filament organization [GO:0045109]
LC-MS/MS		KRT32		Protein	Q14532	K1H2_HUMAN	Keratin, type I cuticular Ha2	448	Coiled coil;Intermediate filament;Keratin;Reference proteome	epidermis development [GO:0008544]; epithelial cell differentiation [GO:0030855]; intermediate filament organization [GO:0045109]
LC-MS/MS		KRT37		Protein	O76014	KRT37_HUMAN	Keratin, type I cuticular Ha7	449	Coiled coil;Intermediate filament;Keratin;Reference proteome	epithelial cell differentiation [GO:0030855]; intermediate filament organization [GO:0045109]
LC-MS/MS		KRT25		Protein	Q7Z3Z0	K1C25_HUMAN	Keratin, type I cytoskeletal 25	450	Coiled coil;Cytoplasm;Disease variant;Hypotrichosis;Intermediate filament;Keratin;Phosphoprotein;Reference proteome	cytoskeleton organization [GO:0007010]; epithelial cell differentiation [GO:0030855]; hair cycle [GO:0042633]; hair follicle morphogenesis [GO:0031069]; intermediate filament organization [GO:0045109]
LC-MS/MS		KRT38		Protein	O76015	KRT38_HUMAN	Keratin, type I cuticular Ha8	456	Coiled coil;Intermediate filament;Keratin;Reference proteome	epithelial cell differentiation [GO:0030855]; intermediate filament organization [GO:0045109]
LC-MS/MS		KRT13		Protein	P13646	K1C13_HUMAN	Keratin, type I cytoskeletal 13	458	Alternative splicing;Coiled coil;Direct protein sequencing;Disease variant;Glycoprotein;Intermediate filament;Keratin;Methylation;Phosphoprotein;Reference proteome	cytoskeleton organization [GO:0007010]; epithelial cell differentiation [GO:0030855]; intermediate filament organization [GO:0045109]; regulation of translation in response to stress [GO:0043555]
LC-MS/MS		KRT27		Protein	Q7Z3Y8	K1C27_HUMAN	Keratin, type I cytoskeletal 27	459	Coiled coil;Cytoplasm;Intermediate filament;Keratin;Reference proteome	epithelial cell differentiation [GO:0030855]; hair follicle morphogenesis [GO:0031069]; intermediate filament organization [GO:0045109]
LC-MS/MS		KRT36		Protein	O76013	KRT36_HUMAN	Keratin, type I cuticular Ha6	467	Alternative splicing;Coiled coil;Intermediate filament;Keratin;Reference proteome	epithelial cell differentiation [GO:0030855]; intermediate filament organization [GO:0045109]; regulation of keratinocyte differentiation [GO:0045616]
LC-MS/MS		KRT12		Protein	Q99456	K1C12_HUMAN	Keratin, type I cytoskeletal 12	494	Coiled coil;Corneal dystrophy;Direct protein sequencing;Disease variant;Intermediate filament;Keratin;Reference proteome	cornea development in camera-type eye [GO:0061303]; epithelial cell differentiation [GO:0030855]; intermediate filament organization [GO:0045109]; morphogenesis of an epithelium [GO:0002009]; visual perception [GO:0007601]
LC-MS/MS		KRT24		Protein	Q2M2I5	K1C24_HUMAN	Keratin, type I cytoskeletal 24	525	Coiled coil;Intermediate filament;Keratin;Reference proteome	epithelial cell differentiation [GO:0030855]; intermediate filament organization [GO:0045109]
LC-MS/MS	KRT9	KRT9		Protein	P35527	K1C9_HUMAN	Keratin, type I cytoskeletal 9	623	Coiled coil;Direct protein sequencing;Disease variant;Intermediate filament;Keratin;Palmoplantar keratoderma;Phosphoprotein;Reference proteome	epidermis development [GO:0008544]; epithelial cell differentiation [GO:0030855]; intermediate filament organization [GO:0045109]; skin development [GO:0043588]; spermatogenesis [GO:0007283]
LC-MS/MS	PDLIM1	PDLIM1		Protein	O00151	PDLI1_HUMAN	PDZ and LIM domain protein 1	329	3D-structure;Acetylation;Cytoplasm;Cytoskeleton;Direct protein sequencing;LIM domain;Metal-binding;Phosphoprotein;Reference proteome;Zinc	actin cytoskeleton organization [GO:0030036]; establishment or maintenance of actin cytoskeleton polarity [GO:0030950]; fibroblast migration [GO:0010761]; heart development [GO:0007507]; maintenance of cell polarity [GO:0030011]; muscle structure development [GO:0061061]; regulation of transcription by RNA polymerase II [GO:0006357]; response to hypoxia [GO:0001666]; response to oxidative stress …
LC-MS/MS	MASP2	MASP2		Protein	O00187	MASP2_HUMAN	Mannan-binding lectin serine protease 2	686	3D-structure;Alternative splicing;Autocatalytic cleavage;Calcium;Complement pathway;Direct protein sequencing;Disease variant;Disulfide bond;EGF-like domain;Hydrolase;Hydroxylation;Immunity;Innate immunity;Metal-binding;Protease;Reference proteome;Repeat;Secreted;Serine protease;Signal;Sushi	complement activation, classical pathway [GO:0006958]; complement activation, lectin pathway [GO:0001867]; proteolysis [GO:0006508]
LC-MS/MS	MPHOSPH10	MPHOSPH10		Protein	O00566	MPP10_HUMAN	U3 small nucleolar ribonucleoprotein protein MPP10	681	3D-structure;Acetylation;Chromosome;Coiled coil;Isopeptide bond;Nucleus;Phosphoprotein;Reference proteome;Ribonucleoprotein;Ribosome biogenesis;rRNA processing;Ubl conjugation	maturation of SSU-rRNA [GO:0030490]; ribosomal small subunit biogenesis [GO:0042274]; RNA processing [GO:0006396]; RNA splicing [GO:0008380]; RNA splicing, via transesterification reactions [GO:0000375]
LC-MS/MS	APOL1	APOL1		Protein	O14791	APOL1_HUMAN	Apolipoprotein L1	398	3D-structure;Alternative splicing;Cholesterol metabolism;Direct protein sequencing;Disease variant;Glycoprotein;HDL;Lipid metabolism;Lipid transport;Phosphoprotein;Reference proteome;Secreted;Signal;Steroid metabolism;Sterol metabolism;Transport	chloride transmembrane transport [GO:1902476]; cholesterol metabolic process [GO:0008203]; cytolysis by host of symbiont cells [GO:0051838]; innate immune response [GO:0045087]; lipid transport [GO:0006869]; lipoprotein metabolic process [GO:0042157]
LC-MS/MS	TRIM66	TRIM66		Protein	O15016	TRI66_HUMAN	Tripartite motif-containing protein 66	1351	3D-structure;Alternative splicing;Bromodomain;Coiled coil;Metal-binding;Nucleus;Reference proteome;Repeat;Zinc;Zinc-finger
LC-MS/MS	CD5L	CD5L		Protein	O43866	CD5L_HUMAN	CD5 antigen-like	347	Apoptosis;Cytoplasm;Direct protein sequencing;Disulfide bond;Glycoprotein;Immunity;Inflammatory response;Reference proteome;Repeat;Secreted;Signal	apoptotic process [GO:0006915]; cellular defense response [GO:0006968]; immune system process [GO:0002376]; inflammatory response [GO:0006954]; positive regulation of complement-dependent cytotoxicity [GO:1903661]; regulation of complement activation [GO:0030449]; zymogen activation [GO:0031638]
LC-MS/MS	ERN1	ERN1		Protein	O75460	ERN1_HUMAN	Serine/threonine-protein kinase/endoribonuclease IRE1	977	3D-structure;ADP-ribosylation;Alternative splicing;Apoptosis;ATP-binding;Disulfide bond;Endoplasmic reticulum;Glycoprotein;Hydrolase;Kinase;Magnesium;Membrane;Metal-binding;Multifunctional enzyme;Nucleotide-binding;Phosphoprotein;Reference proteome;Serine/threonine-protein kinase;Signal;Transcription;Transcription regulation;Transferase;Transmembrane;Transmembrane helix;Unfolded protein response	cellular response to glucose stimulus [GO:0071333]; cellular response to hydrogen peroxide [GO:0070301]; cellular response to unfolded protein [GO:0034620]; cellular response to vascular endothelial growth factor stimulus [GO:0035924]; endothelial cell proliferation [GO:0001935]; insulin metabolic process [GO:1901142]; intrinsic apoptotic signaling pathway in response to endoplasmic reticulum str…
LC-MS/MS	FCN3	FCN3		Protein	O75636	FCN3_HUMAN	Ficolin-3	299	3D-structure;Alternative splicing;Calcium;Collagen;Complement activation lectin pathway;Direct protein sequencing;Disulfide bond;Glycoprotein;Hydroxylation;Immunity;Innate immunity;Lectin;Metal-binding;Reference proteome;Repeat;Secreted;Signal	cell surface pattern recognition receptor signaling pathway [GO:0002752]; complement activation [GO:0006956]; complement activation, lectin pathway [GO:0001867]; defense response to virus [GO:0051607]; negative regulation of RNA biosynthetic process [GO:1902679]; negative regulation of viral entry into host cell [GO:0046597]; positive regulation of opsonization [GO:1903028]; proteolysis [GO:00065…
LC-MS/MS	ATRN	ATRN		Protein	O75882	ATRN_HUMAN	Attractin	1429	Alternative splicing;Cell membrane;Direct protein sequencing;Disulfide bond;EGF-like domain;Glycoprotein;Inflammatory response;Kelch repeat;Laminin EGF-like domain;Lectin;Membrane;Receptor;Reference proteome;Repeat;Secreted;Signal;Transmembrane;Transmembrane helix	cerebellum development [GO:0021549]; inflammatory response [GO:0006954]; myelination [GO:0042552]; pigmentation [GO:0043473]; regulation of multicellular organism growth [GO:0040014]
LC-MS/MS	APOM	APOM		Protein	O95445	APOM_HUMAN	Apolipoprotein M	188	3D-structure;Alternative splicing;Direct protein sequencing;Disulfide bond;Glycoprotein;HDL;Lipid transport;Reference proteome;Secreted;Signal;Transport	cholesterol efflux [GO:0033344]; cholesterol homeostasis [GO:0042632]; high-density lipoprotein particle assembly [GO:0034380]; high-density lipoprotein particle clearance [GO:0034384]; high-density lipoprotein particle remodeling [GO:0034375]; lipoprotein metabolic process [GO:0042157]; negative regulation of plasma lipoprotein oxidation [GO:0034445]; reverse cholesterol transport [GO:0043691]
LC-MS/MS	CP	CP		Protein	P00450	CERU_HUMAN	Ceruloplasmin	1065	3D-structure;Copper;Copper transport;Direct protein sequencing;Disulfide bond;Glycoprotein;Ion transport;Metal-binding;Oxidoreductase;Phosphoprotein;Reference proteome;Repeat;Secreted;Signal;Transport	copper ion transport [GO:0006825]; intracellular iron ion homeostasis [GO:0006879]; iron ion transport [GO:0006826]
LC-MS/MS	F13A1	F13A1		Protein	P00488	F13A_HUMAN	Coagulation factor XIII A chain	732	3D-structure;Acetylation;Acyltransferase;Blood coagulation;Calcium;Cytoplasm;Direct protein sequencing;Disease variant;Glycoprotein;Hemostasis;Metal-binding;Reference proteome;Secreted;Transferase;Zymogen	blood coagulation [GO:0007596]; blood coagulation, fibrin clot formation [GO:0072378]; peptide cross-linking [GO:0018149]
LC-MS/MS	F2	F2		Protein	P00734	THRB_HUMAN	Prothrombin	622	3D-structure;Acute phase;Blood coagulation;Calcium;Cleavage on pair of basic residues;Direct protein sequencing;Disease variant;Disulfide bond;Gamma-carboxyglutamic acid;Glycoprotein;Hemostasis;Hydrolase;Kringle;Pharmaceutical;Protease;Reference proteome;Repeat;Secreted;Serine protease;Signal;Thrombophilia;Zymogen	acute-phase response [GO:0006953]; antimicrobial humoral immune response mediated by antimicrobial peptide [GO:0061844]; blood coagulation [GO:0007596]; cell surface receptor signaling pathway [GO:0007166]; cytolysis by host of symbiont cells [GO:0051838]; fibrinolysis [GO:0042730]; G protein-coupled receptor signaling pathway [GO:0007186]; ligand-gated ion channel signaling pathway [GO:1990806];…
LC-MS/MS	C1R	C1R		Protein	P00736	C1R_HUMAN	Complement C1r subcomponent	705	3D-structure;Complement pathway;Direct protein sequencing;Disease variant;Disulfide bond;EGF-like domain;Ehlers-Danlos syndrome;Glycoprotein;Hydrolase;Hydroxylation;Immunity;Innate immunity;Phosphoprotein;Protease;Reference proteome;Repeat;Secreted;Serine protease;Signal;Sushi	complement activation, classical pathway [GO:0006958]; immune response [GO:0006955]; innate immune response [GO:0045087]; zymogen activation [GO:0031638]
LC-MS/MS	HP	HP		Protein	P00738	HPT_HUMAN	Haptoglobin	406	3D-structure;Acute phase;Alternative splicing;Antibiotic;Antimicrobial;Antioxidant;Direct protein sequencing;Disease variant;Disulfide bond;Glycoprotein;Hemoglobin-binding;Immunity;Reference proteome;Repeat;Secreted;Serine protease homolog;Signal;Sushi	acute-phase response [GO:0006953]; defense response [GO:0006952]; defense response to bacterium [GO:0042742]; immune system process [GO:0002376]; negative regulation of hydrogen peroxide catabolic process [GO:2000296]; negative regulation of oxidoreductase activity [GO:0051354]; response to hydrogen peroxide [GO:0042542]
LC-MS/MS	HPR	HPR		Protein	P00739	HPTR_HUMAN	Haptoglobin-related protein	348	Alternative splicing;Disulfide bond;Hemoglobin-binding;Reference proteome;Secreted;Serine protease homolog;Signal;Sushi
LC-MS/MS	F9	F9		Protein	P00740	FA9_HUMAN	Coagulation factor IX	461	3D-structure;Alternative splicing;Blood coagulation;Calcium;Cleavage on pair of basic residues;Direct protein sequencing;Disease variant;Disulfide bond;EGF-like domain;Gamma-carboxyglutamic acid;Glycoprotein;Hemophilia;Hemostasis;Hydrolase;Hydroxylation;Magnesium;Metal-binding;Pharmaceutical;Phosphoprotein;Protease;Reference proteome;Repeat;Secreted;Serine protease;Signal;Sulfation;Thrombophilia;…	blood coagulation [GO:0007596]; proteolysis [GO:0006508]; zymogen activation [GO:0031638]
LC-MS/MS	F10	F10		Protein	P00742	FA10_HUMAN	Coagulation factor X	488	3D-structure;Blood coagulation;Calcium;Cleavage on pair of basic residues;Direct protein sequencing;Disease variant;Disulfide bond;EGF-like domain;Gamma-carboxyglutamic acid;Glycoprotein;Hemostasis;Hydrolase;Hydroxylation;Protease;Reference proteome;Repeat;Secreted;Serine protease;Signal;Zymogen	blood coagulation [GO:0007596]; positive regulation of cell migration [GO:0030335]; positive regulation of phosphatidylinositol 3-kinase signaling/protein kinase B signal transduction [GO:0051897]; proteolysis [GO:0006508]
LC-MS/MS	CFD	CFD		Protein	P00746	CFAD_HUMAN	Complement factor D	253	3D-structure;Complement alternate pathway;Direct protein sequencing;Disease variant;Disulfide bond;Hydrolase;Immunity;Innate immunity;Protease;Reference proteome;Secreted;Serine protease;Signal;Zymogen	complement activation [GO:0006956]; complement activation, alternative pathway [GO:0006957]; proteolysis [GO:0006508]; response to bacterium [GO:0009617]
LC-MS/MS	PLG	PLG		Protein	P00747	PLMN_HUMAN	Plasminogen	810	3D-structure;Blood coagulation;Cleavage on pair of basic residues;Direct protein sequencing;Disease variant;Disulfide bond;Fibrinolysis;Glycoprotein;Hemostasis;Hydrolase;Kringle;Phosphoprotein;Protease;Reference proteome;Repeat;Secreted;Serine protease;Signal;Thrombophilia;Tissue remodeling;Zymogen	biological process involved in interaction with symbiont [GO:0051702]; blood coagulation [GO:0007596]; extracellular matrix disassembly [GO:0022617]; fibrinolysis [GO:0042730]; negative regulation of cell population proliferation [GO:0008285]; negative regulation of cell-cell adhesion mediated by cadherin [GO:2000048]; negative regulation of cell-substrate adhesion [GO:0010812]; negative regulati…
LC-MS/MS		PLGLB1		Protein	Q02325	PLGB_HUMAN	Plasminogen-like protein B	96	Disulfide bond;Reference proteome;Secreted;Signal
LC-MS/MS		PLGLA		Protein	Q15195	PLGA_HUMAN	Plasminogen-like protein A	96	Disulfide bond;Reference proteome;Secreted;Signal
LC-MS/MS	F12	F12		Protein	P00748	FA12_HUMAN	Coagulation factor XII	615	3D-structure;Blood coagulation;Direct protein sequencing;Disease variant;Disulfide bond;EGF-like domain;Fibrinolysis;Glycoprotein;Hemostasis;Hydrolase;Kringle;Protease;Reference proteome;Repeat;Secreted;Serine protease;Signal;Zymogen	blood coagulation [GO:0007596]; blood coagulation, intrinsic pathway [GO:0007597]; Factor XII activation [GO:0002542]; fibrinolysis [GO:0042730]; innate immune response [GO:0045087]; plasma kallikrein-kinin cascade [GO:0002353]; positive regulation of blood coagulation [GO:0030194]; positive regulation of fibrinolysis [GO:0051919]; positive regulation of plasminogen activation [GO:0010756]; prote…
LC-MS/MS	CFB	CFB		Protein	P00751	CFAB_HUMAN	Complement factor B	764	3D-structure;Age-related macular degeneration;Alternative splicing;Cleavage on pair of basic residues;Complement alternate pathway;Direct protein sequencing;Disease variant;Disulfide bond;Glycation;Glycoprotein;Hemolytic uremic syndrome;Hydrolase;Immunity;Innate immunity;Protease;Reference proteome;Repeat;Secreted;Serine protease;Signal;Sushi;Zymogen	complement activation [GO:0006956]; complement activation, alternative pathway [GO:0006957]; proteolysis [GO:0006508]; response to bacterium [GO:0009617]
LC-MS/MS	CA1	CA1		Protein	P00915	CAH1_HUMAN	Carbonic anhydrase 1	261	3D-structure;Acetylation;Cytoplasm;Direct protein sequencing;Lyase;Metal-binding;Reference proteome;Zinc	one-carbon metabolic process [GO:0006730]
LC-MS/MS	CA2	CA2		Protein	P00918	CAH2_HUMAN	Carbonic anhydrase 2	260	3D-structure;Acetylation;Cell membrane;Cytoplasm;Direct protein sequencing;Disease variant;Lyase;Membrane;Metal-binding;Osteopetrosis;Phosphoprotein;Reference proteome;Zinc	angiotensin-activated signaling pathway [GO:0038166]; carbon dioxide transport [GO:0015670]; morphogenesis of an epithelium [GO:0002009]; neuron cellular homeostasis [GO:0070050]; one-carbon metabolic process [GO:0006730]; positive regulation of cellular pH reduction [GO:0032849]; positive regulation of dipeptide transmembrane transport [GO:2001150]; positive regulation of synaptic transmission, …
LC-MS/MS	SERPINC1	SERPINC1		Protein	P01008	ANT3_HUMAN	Antithrombin-III	464	3D-structure;Blood coagulation;Direct protein sequencing;Disease variant;Disulfide bond;Glycoprotein;Hemostasis;Heparin-binding;Phosphoprotein;Protease inhibitor;Reference proteome;Secreted;Serine protease inhibitor;Signal;Thrombophilia	blood coagulation [GO:0007596]; regulation of blood coagulation [GO:0030193]
LC-MS/MS	SERPINA1	SERPINA1		Protein	P01009	A1AT_HUMAN	Alpha-1-antitrypsin	418	3D-structure;Acute phase;Alternative splicing;Blood coagulation;Direct protein sequencing;Endoplasmic reticulum;Extracellular matrix;Glycoprotein;Hemostasis;Phosphoprotein;Protease inhibitor;Reference proteome;Secreted;Serine protease inhibitor;Signal	acute-phase response [GO:0006953]; blood coagulation [GO:0007596]
LC-MS/MS	SERPINA3	SERPINA3		Protein	P01011	AACT_HUMAN	Alpha-1-antichymotrypsin	423	3D-structure;Acute phase;Alternative splicing;Direct protein sequencing;Disease variant;Glycoprotein;Protease inhibitor;Reference proteome;Secreted;Serine protease inhibitor;Signal	acute-phase response [GO:0006953]; inflammatory response [GO:0006954]; maintenance of gastrointestinal epithelium [GO:0030277]; regulation of lipid metabolic process [GO:0019216]
LC-MS/MS	AGT	AGT		Protein	P01019	ANGT_HUMAN	Angiotensinogen	485	3D-structure;Direct protein sequencing;Disease variant;Disulfide bond;Glycoprotein;Reference proteome;Secreted;Signal;Vasoactive;Vasoconstrictor	angiotensin-activated signaling pathway [GO:0038166]; blood vessel remodeling [GO:0001974]; cell-cell signaling [GO:0007267]; G protein-coupled receptor signaling pathway [GO:0007186]; G protein-coupled receptor signaling pathway coupled to cGMP nucleotide second messenger [GO:0007199]; kidney development [GO:0001822]; low-density lipoprotein particle remodeling [GO:0034374]; maintenance of blood…
LC-MS/MS	A2M	A2M	X	Protein	P01023	A2MG_HUMAN	Alpha-2-macroglobulin	1474	3D-structure;Bait region;Direct protein sequencing;Disulfide bond;Glycoprotein;Isopeptide bond;Protease inhibitor;Reference proteome;Secreted;Serine protease inhibitor;Signal;Thioester bond	acute inflammatory response to antigenic stimulus [GO:0002438]; acute-phase response [GO:0006953]; embryonic liver development [GO:1990402]; luteinization [GO:0001553]; negative regulation of complement activation, lectin pathway [GO:0001869]; response to carbon dioxide [GO:0010037]; response to glucocorticoid [GO:0051384]; response to nutrient [GO:0007584]; response to prostaglandin E [GO:003469…
LC-MS/MS	C3	C3		Protein	P01024	CO3_HUMAN	Complement C3	1663	3D-structure;Age-related macular degeneration;Cleavage on pair of basic residues;Complement alternate pathway;Complement pathway;Direct protein sequencing;Disease variant;Disulfide bond;Fatty acid metabolism;Glycoprotein;Hemolytic uremic syndrome;Immunity;Inflammatory response;Innate immunity;Lipid metabolism;Phosphoprotein;Reference proteome;Secreted;Signal;Thioester bond	amyloid-beta clearance [GO:0097242]; cell surface receptor signaling pathway involved in cell-cell signaling [GO:1905114]; complement activation [GO:0006956]; complement activation, alternative pathway [GO:0006957]; complement activation, classical pathway [GO:0006958]; complement-dependent cytotoxicity [GO:0097278]; complement-mediated synapse pruning [GO:0150062]; fatty acid metabolic process […
LC-MS/MS		METTL18		Protein	O95568	MET18_HUMAN	Histidine protein methyltransferase 1 homolog	372	3D-structure;Cytoplasm;Methylation;Methyltransferase;Nucleus;Phosphoprotein;Reference proteome;S-adenosyl-L-methionine;Transferase	peptidyl-lysine monomethylation [GO:0018026]; regulation of ribosome biogenesis [GO:0090069]; regulation of rRNA processing [GO:2000232]; regulation of translation [GO:0006417]; regulation of translational elongation [GO:0006448]
LC-MS/MS	C5	C5		Protein	P01031	CO5_HUMAN	Complement C5	1676	3D-structure;Cleavage on pair of basic residues;Complement alternate pathway;Complement pathway;Cytolysis;Direct protein sequencing;Disulfide bond;Glycoprotein;Immunity;Inflammatory response;Innate immunity;Membrane attack complex;Reference proteome;Secreted;Signal	cell surface receptor signaling pathway [GO:0007166]; chemotaxis [GO:0006935]; complement activation, alternative pathway [GO:0006957]; complement activation, classical pathway [GO:0006958]; G protein-coupled receptor signaling pathway [GO:0007186]; inflammatory response [GO:0006954]; killing of cells of another organism [GO:0031640]; negative regulation of macrophage chemotaxis [GO:0010760]; pos…
LC-MS/MS	CST3	CST3		Protein	P01034	CYTC_HUMAN	Cystatin-C	146	3D-structure;Age-related macular degeneration;Amyloid;Amyloidosis;Direct protein sequencing;Disease variant;Disulfide bond;Glycoprotein;Phosphoprotein;Protease inhibitor;Reference proteome;Secreted;Signal;Thiol protease inhibitor	defense response [GO:0006952]; negative regulation of blood vessel remodeling [GO:0060313]; negative regulation of collagen catabolic process [GO:0010711]; negative regulation of elastin catabolic process [GO:0060311]; negative regulation of extracellular matrix disassembly [GO:0010716]; negative regulation of peptidase activity [GO:0010466]; negative regulation of proteolysis [GO:0045861]; regul…
LC-MS/MS	KNG1	KNG1		Protein	P01042	KNG1_HUMAN	Kininogen-1	644	3D-structure;Alternative splicing;Blood coagulation;Direct protein sequencing;Disease variant;Disulfide bond;Glycoprotein;Hemostasis;Hydroxylation;Inflammatory response;Phosphoprotein;Protease inhibitor;Pyrrolidone carboxylic acid;Reference proteome;Repeat;Secreted;Signal;Thiol protease inhibitor;Vasoactive;Vasodilator	blood coagulation [GO:0007596]; inflammatory response [GO:0006954]; negative regulation of blood coagulation [GO:0030195]; negative regulation of cell adhesion [GO:0007162]; negative regulation of proteolysis [GO:0045861]; positive regulation of apoptotic process [GO:0043065]; positive regulation of cytosolic calcium ion concentration [GO:0007204]; vasodilation [GO:0042311]
LC-MS/MS	IGF2	IGF2		Protein	P01344	IGF2_HUMAN	Insulin-like growth factor II	180	3D-structure;Alternative splicing;Carbohydrate metabolism;Cleavage on pair of basic residues;Direct protein sequencing;Disease variant;Disulfide bond;Dwarfism;Glucose metabolism;Glycoprotein;Growth factor;Hormone;Mitogen;Osteogenesis;Reference proteome;Secreted;Signal	animal organ morphogenesis [GO:0009887]; embryonic placenta development [GO:0001892]; embryonic placenta morphogenesis [GO:0060669]; exocrine pancreas development [GO:0031017]; glucose metabolic process [GO:0006006]; in utero embryonic development [GO:0001701]; insulin receptor signaling pathway [GO:0008286]; insulin receptor signaling pathway via phosphatidylinositol 3-kinase [GO:0038028]; insul…
LC-MS/MS	JCHAIN	JCHAIN		Ig peptide	P01591	IGJ_HUMAN	Immunoglobulin J chain	159	3D-structure;Direct protein sequencing;Disulfide bond;Glycoprotein;Pyrrolidone carboxylic acid;Reference proteome;Secreted;Signal	adaptive immune response [GO:0002250]; antibacterial humoral response [GO:0019731]; glomerular filtration [GO:0003094]; humoral immune response [GO:0006959]; immune response [GO:0006955]; innate immune response [GO:0045087]; positive regulation of respiratory burst [GO:0060267]; protein-containing complex assembly [GO:0065003]; retina homeostasis [GO:0001895]
LC-MS/MS	IGKV1D-33	IGKV1-33		Ig peptide	P01594	KV133_HUMAN	Immunoglobulin kappa variable 1-33	117	3D-structure;Adaptive immunity;Bence-Jones protein;Cell membrane;Direct protein sequencing;Disulfide bond;Immunity;Immunoglobulin;Immunoglobulin domain;Membrane;Reference proteome;Secreted;Signal	adaptive immune response [GO:0002250]; immune response [GO:0006955]
LC-MS/MS		IGKV1D-33		Ig peptide	P01593	KVD33_HUMAN	Immunoglobulin kappa variable 1D-33	117	3D-structure;Adaptive immunity;Cell membrane;Direct protein sequencing;Disulfide bond;Immunity;Immunoglobulin;Immunoglobulin domain;Membrane;Reference proteome;Secreted;Signal	adaptive immune response [GO:0002250]; immune response [GO:0006955]
LC-MS/MS	IGKV1-17	IGKV1-17		Ig peptide	P01599	KV117_HUMAN	Immunoglobulin kappa variable 1-17	117	Adaptive immunity;Cell membrane;Direct protein sequencing;Disulfide bond;Immunity;Immunoglobulin;Immunoglobulin domain;Membrane;Reference proteome;Secreted;Signal	adaptive immune response [GO:0002250]; immune response [GO:0006955]
LC-MS/MS	IGKV1D-16	IGKV1D-16		Ig peptide	P01601	KVD16_HUMAN	Immunoglobulin kappa variable 1D-16	117	Adaptive immunity;Cell membrane;Disulfide bond;Immunity;Immunoglobulin;Immunoglobulin domain;Membrane;Reference proteome;Secreted;Signal	adaptive immune response [GO:0002250]; immune response [GO:0006955]
LC-MS/MS	IGKV1-5	IGKV1-5		Ig peptide	P01602	KV105_HUMAN	Immunoglobulin kappa variable 1-5	117	Adaptive immunity;Cell membrane;Direct protein sequencing;Disulfide bond;Immunity;Immunoglobulin;Immunoglobulin domain;Membrane;Reference proteome;Secreted;Signal	adaptive immune response [GO:0002250]; immune response [GO:0006955]
LC-MS/MS	IGKV3[D]-20	IGKV3-20		Ig peptide	P01619	KV320_HUMAN	Immunoglobulin kappa variable 3-20	116	3D-structure;Adaptive immunity;Cell membrane;Direct protein sequencing;Disulfide bond;Immunity;Immunoglobulin;Immunoglobulin domain;Membrane;Reference proteome;Secreted;Signal	adaptive immune response [GO:0002250]; antibacterial humoral response [GO:0019731]; glomerular filtration [GO:0003094]; immune response [GO:0006955]
LC-MS/MS		IGKV3D-20		Ig peptide	A0A0C4DH25	KVD20_HUMAN	Immunoglobulin kappa variable 3D-20	116	Adaptive immunity;Cell membrane;Disulfide bond;Immunity;Immunoglobulin;Immunoglobulin domain;Membrane;Reference proteome;Secreted;Signal	adaptive immune response [GO:0002250]; immune response [GO:0006955]
LC-MS/MS	IGKV3[D]-15/7	IGKV3-15		Ig peptide	P01624	KV315_HUMAN	Immunoglobulin kappa variable 3-15	115	Adaptive immunity;Cell membrane;Direct protein sequencing;Disulfide bond;Immunity;Immunoglobulin;Immunoglobulin domain;Membrane;Reference proteome;Secreted;Signal	adaptive immune response [GO:0002250]; immune response [GO:0006955]
LC-MS/MS		IGKV3D-15		Ig peptide	A0A087WSY6	KVD15_HUMAN	Immunoglobulin kappa variable 3D-15	115	Adaptive immunity;Cell membrane;Disulfide bond;Immunity;Immunoglobulin;Immunoglobulin domain;Membrane;Reference proteome;Secreted;Signal	adaptive immune response [GO:0002250]; immune response [GO:0006955]
LC-MS/MS		IGKV3D-7		Ig peptide	A0A0C4DH55	KVD07_HUMAN	Immunoglobulin kappa variable 3D-7	119	Adaptive immunity;Cell membrane;Disulfide bond;Immunity;Immunoglobulin;Immunoglobulin domain;Membrane;Reference proteome;Secreted;Signal	adaptive immune response [GO:0002250]; immune response [GO:0006955]
LC-MS/MS	IGLV1-44	IGLV1-44		Ig peptide	P01699	LV144_HUMAN	Immunoglobulin lambda variable 1-44	117	Adaptive immunity;Cell membrane;Direct protein sequencing;Disulfide bond;Immunity;Immunoglobulin;Immunoglobulin domain;Membrane;Pyrrolidone carboxylic acid;Reference proteome;Secreted;Signal	adaptive immune response [GO:0002250]; immune response [GO:0006955]
LC-MS/MS	IGLV1-47	IGLV1-47		Ig peptide	P01700	LV147_HUMAN	Immunoglobulin lambda variable 1-47	117	3D-structure;Adaptive immunity;Cell membrane;Direct protein sequencing;Disulfide bond;Immunity;Immunoglobulin;Immunoglobulin domain;Membrane;Pyrrolidone carboxylic acid;Reference proteome;Secreted;Signal	adaptive immune response [GO:0002250]; immune response [GO:0006955]
LC-MS/MS	IGLV1-51	IGLV1-51		Ig peptide	P01701	LV151_HUMAN	Immunoglobulin lambda variable 1-51	117	Adaptive immunity;Cell membrane;Direct protein sequencing;Disulfide bond;Immunity;Immunoglobulin;Immunoglobulin domain;Membrane;Pyrrolidone carboxylic acid;Reference proteome;Secreted;Signal	adaptive immune response [GO:0002250]; immune response [GO:0006955]
LC-MS/MS	IGLV1-40	IGLV1-40		Ig peptide	P01703	LV140_HUMAN	Immunoglobulin lambda variable 1-40	118	Adaptive immunity;Cell membrane;Direct protein sequencing;Disulfide bond;Immunity;Immunoglobulin;Immunoglobulin domain;Membrane;Pyrrolidone carboxylic acid;Reference proteome;Secreted;Signal	adaptive immune response [GO:0002250]; immune response [GO:0006955]
LC-MS/MS	IGLV2-11	IGLV2-11		Ig peptide	P01706	LV211_HUMAN	Immunoglobulin lambda variable 2-11	119	Adaptive immunity;Cell membrane;Direct protein sequencing;Disulfide bond;Immunity;Immunoglobulin;Immunoglobulin domain;Membrane;Pyrrolidone carboxylic acid;Reference proteome;Secreted;Signal	adaptive immune response [GO:0002250]; immune response [GO:0006955]
LC-MS/MS	IGLV3-19	IGLV3-19		Ig peptide	P01714	LV319_HUMAN	Immunoglobulin lambda variable 3-19	112	3D-structure;Adaptive immunity;Cell membrane;Direct protein sequencing;Disulfide bond;Immunity;Immunoglobulin;Immunoglobulin domain;Membrane;Reference proteome;Secreted;Signal	adaptive immune response [GO:0002250]; immune response [GO:0006955]
LC-MS/MS	IGLV3-1	IGLV3-1		Ig peptide	P01715	LV301_HUMAN	Immunoglobulin lambda variable 3-1	115	Adaptive immunity;Cell membrane;Direct protein sequencing;Disulfide bond;Immunity;Immunoglobulin;Immunoglobulin domain;Membrane;Reference proteome;Secreted;Signal	adaptive immune response [GO:0002250]; immune response [GO:0006955]
LC-MS/MS	IGLV3-25	IGLV3-25		Ig peptide	P01717	LV325_HUMAN	Immunoglobulin lambda variable 3-25	112	Adaptive immunity;Cell membrane;Direct protein sequencing;Disulfide bond;Immunity;Immunoglobulin;Immunoglobulin domain;Membrane;Reference proteome;Secreted;Signal	adaptive immune response [GO:0002250]; immune response [GO:0006955]
LC-MS/MS	IGLV6-57	IGLV6-57		Ig peptide	P01721	LV657_HUMAN	Immunoglobulin lambda variable 6-57	117	3D-structure;Adaptive immunity;Cell membrane;Direct protein sequencing;Disulfide bond;Immunity;Immunoglobulin;Immunoglobulin domain;Membrane;Reference proteome;Secreted;Signal	adaptive immune response [GO:0002250]; immune response [GO:0006955]
LC-MS/MS	IGHV1-69	IGHV1-69		Ig peptide	P01742	HV169_HUMAN	Immunoglobulin heavy variable 1-69	117	Adaptive immunity;Cell membrane;Direct protein sequencing;Disulfide bond;Immunity;Immunoglobulin;Immunoglobulin domain;Membrane;Pyrrolidone carboxylic acid;Reference proteome;Secreted;Signal	immune response [GO:0006955]; immunoglobulin mediated immune response [GO:0016064]
LC-MS/MS	IGHV1-46	IGHV1-46		Ig peptide	P01743	HV146_HUMAN	Immunoglobulin heavy variable 1-46	117	Adaptive immunity;Cell membrane;Direct protein sequencing;Disulfide bond;Immunity;Immunoglobulin;Immunoglobulin domain;Membrane;Reference proteome;Secreted;Signal	immune response [GO:0006955]; immunoglobulin mediated immune response [GO:0016064]
LC-MS/MS	IGHV3-23	IGHV3-23		Ig peptide	P01764	HV323_HUMAN	Immunoglobulin heavy variable 3-23	117	3D-structure;Adaptive immunity;Cell membrane;Direct protein sequencing;Disulfide bond;Immunity;Immunoglobulin;Immunoglobulin domain;Membrane;Reference proteome;Secreted;Signal	immune response [GO:0006955]; immunoglobulin mediated immune response [GO:0016064]
LC-MS/MS	IGHV3-13	IGHV3-13		Ig peptide	P01766	HV313_HUMAN	Immunoglobulin heavy variable 3-13	116	Adaptive immunity;Cell membrane;Direct protein sequencing;Disulfide bond;Immunity;Immunoglobulin;Immunoglobulin domain;Membrane;Reference proteome;Secreted;Signal	immune response [GO:0006955]; immunoglobulin mediated immune response [GO:0016064]
LC-MS/MS	IGHV3-33	IGHV3-33		Ig peptide	P01772	HV333_HUMAN	Immunoglobulin heavy variable 3-33	117	3D-structure;Adaptive immunity;Cell membrane;Direct protein sequencing;Disulfide bond;Immunity;Immunoglobulin;Immunoglobulin domain;Membrane;Pyrrolidone carboxylic acid;Reference proteome;Secreted;Signal	immune response [GO:0006955]; immunoglobulin mediated immune response [GO:0016064]
LC-MS/MS	IGHV3-7	IGHV3-7		Ig peptide	P01780	HV307_HUMAN	Immunoglobulin heavy variable 3-7	117	3D-structure;Adaptive immunity;Cell membrane;Direct protein sequencing;Disulfide bond;Immunity;Immunoglobulin;Immunoglobulin domain;Membrane;Reference proteome;Secreted;Signal	immune response [GO:0006955]; immunoglobulin mediated immune response [GO:0016064]
LC-MS/MS	IGHV3-[9,43D]	IGHV3-9		Ig peptide	P01782	HV309_HUMAN	Immunoglobulin heavy variable 3-9	118	Adaptive immunity;Cell membrane;Direct protein sequencing;Disulfide bond;Immunity;Immunoglobulin;Immunoglobulin domain;Membrane;Reference proteome;Secreted;Signal	immune response [GO:0006955]; immunoglobulin mediated immune response [GO:0016064]
LC-MS/MS		IGHV3-43D		Ig peptide	P0DP04	HV43D_HUMAN	Immunoglobulin heavy variable 3-43D	118	Adaptive immunity;Cell membrane;Disulfide bond;Immunity;Immunoglobulin;Immunoglobulin domain;Membrane;Reference proteome;Secreted;Signal	immunoglobulin mediated immune response [GO:0016064]
LC-MS/MS	IGHV2-5	IGHV2-5		Ig peptide	P01817	HV205_HUMAN	Immunoglobulin heavy variable 2-5	119	Adaptive immunity;Cell membrane;Direct protein sequencing;Disulfide bond;Immunity;Immunoglobulin;Immunoglobulin domain;Membrane;Pyrrolidone carboxylic acid;Reference proteome;Secreted;Signal	immune response [GO:0006955]; immunoglobulin mediated immune response [GO:0016064]
LC-MS/MS	PIGR	PIGR		Protein	P01833	PIGR_HUMAN	Polymeric immunoglobulin receptor	764	3D-structure;Cell membrane;Direct protein sequencing;Disulfide bond;Glycoprotein;Immunoglobulin domain;Membrane;Phosphoprotein;Reference proteome;Repeat;Secreted;Signal;Transmembrane;Transmembrane helix	detection of chemical stimulus involved in sensory perception of bitter taste [GO:0001580]; epidermal growth factor receptor signaling pathway [GO:0007173]; Fc receptor signaling pathway [GO:0038093]; immunoglobulin transcytosis in epithelial cells mediated by polymeric immunoglobulin receptor [GO:0002415]; receptor clustering [GO:0043113]; retina homeostasis [GO:0001895]
LC-MS/MS	IGK[C]	IGKC		Ig peptide	P01834	IGKC_HUMAN	Immunoglobulin kappa constant	107	3D-structure;Adaptive immunity;Cell membrane;Direct protein sequencing;Disease variant;Disulfide bond;Immunity;Immunoglobulin;Immunoglobulin domain;Membrane;Reference proteome;Secreted	adaptive immune response [GO:0002250]; B cell receptor signaling pathway [GO:0050853]; immune response [GO:0006955]; immunoglobulin mediated immune response [GO:0016064]; retina homeostasis [GO:0001895]
LC-MS/MS				Ig peptide	P0DOX7	IGK_HUMAN	Immunoglobulin kappa light chain	214	3D-structure;Adaptive immunity;Cell membrane;Direct protein sequencing;Disulfide bond;Immunity;Immunoglobulin;Immunoglobulin domain;Membrane;Repeat;Secreted	adaptive immune response [GO:0002250]
LC-MS/MS	IGHG2	IGHG2		Ig peptide	P01859	IGHG2_HUMAN	Immunoglobulin heavy constant gamma 2	395	3D-structure;Adaptive immunity;Alternative splicing;Cell membrane;Direct protein sequencing;Disulfide bond;Glycoprotein;Immunity;Immunoglobulin;Immunoglobulin domain;Membrane;Reference proteome;Secreted;Transmembrane;Transmembrane helix	adaptive immune response [GO:0002250]; antibacterial humoral response [GO:0019731]; B cell receptor signaling pathway [GO:0050853]; complement activation, classical pathway [GO:0006958]
LC-MS/MS	IGHG3	IGHG3		Ig peptide	P01860	IGHG3_HUMAN	Immunoglobulin heavy constant gamma 3	446	3D-structure;Adaptive immunity;Alternative splicing;Cell membrane;Direct protein sequencing;Disulfide bond;Glycoprotein;Immunity;Immunoglobulin;Immunoglobulin domain;Membrane;Reference proteome;Repeat;Secreted;Transmembrane;Transmembrane helix	adaptive immune response [GO:0002250]; antibacterial humoral response [GO:0019731]; B cell receptor signaling pathway [GO:0050853]; complement activation, classical pathway [GO:0006958]; retina homeostasis [GO:0001895]
LC-MS/MS	IGHG4	IGHG4		Ig peptide	P01861	IGHG4_HUMAN	Immunoglobulin heavy constant gamma 4	396	3D-structure;Adaptive immunity;Alternative splicing;Cell membrane;Direct protein sequencing;Disulfide bond;Glycoprotein;Immunity;Immunoglobulin;Immunoglobulin domain;Membrane;Reference proteome;Secreted;Transmembrane;Transmembrane helix	adaptive immune response [GO:0002250]; antibacterial humoral response [GO:0019731]; B cell receptor signaling pathway [GO:0050853]; complement activation, classical pathway [GO:0006958]
LC-MS/MS	IG[H]M	IGHM		Ig peptide	P01871	IGHM_HUMAN	Immunoglobulin heavy constant mu	474	3D-structure;Adaptive immunity;Alternative splicing;Cell membrane;Direct protein sequencing;Disulfide bond;Glycoprotein;Immunity;Immunoglobulin;Immunoglobulin domain;Membrane;Reference proteome;Secreted;Transmembrane;Transmembrane helix	adaptive immune response [GO:0002250]; antibacterial humoral response [GO:0019731]; B cell receptor signaling pathway [GO:0050853]; complement activation, classical pathway [GO:0006958]; defense response to Gram-negative bacterium [GO:0050829]; innate immune response [GO:0045087]
LC-MS/MS				Ig peptide	P0DOX6	IGM_HUMAN	Immunoglobulin mu heavy chain	576	Adaptive immunity;Cell membrane;Direct protein sequencing;Disulfide bond;Glycoprotein;Immunity;Immunoglobulin;Immunoglobulin domain;Membrane;Pyrrolidone carboxylic acid;Repeat;Secreted	adaptive immune response [GO:0002250]
LC-MS/MS	IGHA1	IGHA1		Ig peptide	P01876	IGHA1_HUMAN	Immunoglobulin heavy constant alpha 1	398	3D-structure;Adaptive immunity;Alternative splicing;Cell membrane;Chromophore;Chromosomal rearrangement;Direct protein sequencing;Disulfide bond;Glycoprotein;Immunity;Immunoglobulin;Immunoglobulin domain;Membrane;Reference proteome;Secreted;Transmembrane;Transmembrane helix	adaptive immune response [GO:0002250]; antibacterial humoral response [GO:0019731]; B cell receptor signaling pathway [GO:0050853]; complement activation, classical pathway [GO:0006958]; glomerular filtration [GO:0003094]; immune response [GO:0006955]; positive regulation of respiratory burst [GO:0060267]; retina homeostasis [GO:0001895]
LC-MS/MS	IG[H]D	IGHD		Ig peptide	P01880	IGHD_HUMAN	Immunoglobulin heavy constant delta	430	3D-structure;Adaptive immunity;Alternative splicing;Cell membrane;Direct protein sequencing;Disulfide bond;Glycoprotein;Immunity;Immunoglobulin;Immunoglobulin domain;Membrane;Reference proteome;Secreted;Transmembrane;Transmembrane helix	adaptive immune response [GO:0002250]; B cell receptor signaling pathway [GO:0050853]; immune response [GO:0006955]; immunoglobulin mediated immune response [GO:0016064]; positive regulation of interleukin-1 production [GO:0032732]
LC-MS/MS				Ig peptide	P0DOX3	IGD_HUMAN	Immunoglobulin delta heavy chain	512	3D-structure;Adaptive immunity;Cell membrane;Direct protein sequencing;Disulfide bond;Glycoprotein;Immunity;Immunoglobulin;Immunoglobulin domain;Membrane;Secreted	adaptive immune response [GO:0002250]; monocyte activation [GO:0042117]; positive regulation of interleukin-1 beta production [GO:0032731]; positive regulation of interleukin-1 production [GO:0032732]; positive regulation of tumor necrosis factor production [GO:0032760]
LC-MS/MS	HB[D,E1]	HBD		Protein	P02042	HBD_HUMAN	Hemoglobin subunit delta	147	3D-structure;Acetylation;Direct protein sequencing;Heme;Iron;Metal-binding;Oxygen transport;Phosphoprotein;Reference proteome;Transport	carbon dioxide transport [GO:0015670]; cellular oxidant detoxification [GO:0098869]; hydrogen peroxide catabolic process [GO:0042744]; oxygen transport [GO:0015671]
LC-MS/MS		HBE1		Protein	P02100	HBE_HUMAN	Hemoglobin subunit epsilon	147	3D-structure;Direct protein sequencing;Heme;Iron;Metal-binding;Oxygen transport;Phosphoprotein;Reference proteome;Transport	carbon dioxide transport [GO:0015670]; cellular oxidant detoxification [GO:0098869]; hydrogen peroxide catabolic process [GO:0042744]; oxygen transport [GO:0015671]; response to organic cyclic compound [GO:0014070]
LC-MS/MS	APOA1	APOA1		Protein	P02647	APOA1_HUMAN	Apolipoprotein A-I	267	3D-structure;Amyloid;Amyloidosis;Atherosclerosis;Cholesterol metabolism;Direct protein sequencing;Disease variant;Glycation;Glycoprotein;HDL;Lipid metabolism;Lipid transport;Lipoprotein;Neuropathy;Oxidation;Palmitate;Phosphoprotein;Reference proteome;Repeat;Secreted;Signal;Steroid metabolism;Sterol metabolism;Transport	adrenal gland development [GO:0030325]; blood vessel endothelial cell migration [GO:0043534]; cholesterol biosynthetic process [GO:0006695]; cholesterol efflux [GO:0033344]; cholesterol homeostasis [GO:0042632]; cholesterol import [GO:0070508]; cholesterol metabolic process [GO:0008203]; cholesterol transport [GO:0030301]; endothelial cell proliferation [GO:0001935]; G protein-coupled receptor si…
LC-MS/MS	APOE	APOE		Protein	P02649	APOE_HUMAN	Apolipoprotein E	317	3D-structure;Alzheimer disease;Amyloidosis;Cholesterol metabolism;Chylomicron;Direct protein sequencing;Disease variant;Endosome;Extracellular matrix;Glycation;Glycoprotein;HDL;Heparin-binding;Host-virus interaction;Hyperlipidemia;Lipid metabolism;Lipid transport;Lipid-binding;Neurodegeneration;Oxidation;Phosphoprotein;Reference proteome;Repeat;Secreted;Signal;Steroid metabolism;Sterol metabolism…	AMPA glutamate receptor clustering [GO:0097113]; amyloid precursor protein metabolic process [GO:0042982]; artery morphogenesis [GO:0048844]; cGMP-mediated signaling [GO:0019934]; cholesterol catabolic process [GO:0006707]; cholesterol efflux [GO:0033344]; cholesterol homeostasis [GO:0042632]; cholesterol metabolic process [GO:0008203]; chylomicron remnant clearance [GO:0034382]; cytoskeleton org…
LC-MS/MS	APOA2	APOA2		Protein	P02652	APOA2_HUMAN	Apolipoprotein A-II	100	Cleavage on pair of basic residues;Direct protein sequencing;Disulfide bond;Glycoprotein;HDL;Host-virus interaction;Lipid transport;Oxidation;Phosphoprotein;Pyrrolidone carboxylic acid;Reference proteome;Secreted;Signal;Transport	animal organ regeneration [GO:0031100]; cholesterol efflux [GO:0033344]; cholesterol homeostasis [GO:0042632]; cholesterol metabolic process [GO:0008203]; cholesterol transport [GO:0030301]; diacylglycerol catabolic process [GO:0046340]; high-density lipoprotein particle assembly [GO:0034380]; high-density lipoprotein particle clearance [GO:0034384]; high-density lipoprotein particle remodeling […
LC-MS/MS	APOC1	APOC1		Protein	P02654	APOC1_HUMAN	Apolipoprotein C-I	83	3D-structure;Direct protein sequencing;Lipid transport;Reference proteome;Secreted;Signal;Transport;VLDL	cholesterol efflux [GO:0033344]; cholesterol metabolic process [GO:0008203]; chylomicron remnant clearance [GO:0034382]; high-density lipoprotein particle remodeling [GO:0034375]; lipid metabolic process [GO:0006629]; lipoprotein metabolic process [GO:0042157]; negative regulation of cholesterol transport [GO:0032375]; negative regulation of fatty acid biosynthetic process [GO:0045717]; negative …
LC-MS/MS	APOC2	APOC2		Protein	P02655	APOC2_HUMAN	Apolipoprotein C-II	101	3D-structure;Chylomicron;Direct protein sequencing;Disease variant;Glycoprotein;HDL;Hyperlipidemia;LDL;Lipid degradation;Lipid metabolism;Lipid transport;Reference proteome;Secreted;Sialic acid;Signal;Transport;VLDL	cholesterol efflux [GO:0033344]; cholesterol homeostasis [GO:0042632]; chylomicron remnant clearance [GO:0034382]; chylomicron remodeling [GO:0034371]; high-density lipoprotein particle clearance [GO:0034384]; lipid catabolic process [GO:0016042]; negative regulation of cholesterol transport [GO:0032375]; negative regulation of lipid metabolic process [GO:0045833]; negative regulation of receptor…
LC-MS/MS	APOC3	APOC3		Protein	P02656	APOC3_HUMAN	Apolipoprotein C-III	99	3D-structure;Chylomicron;Direct protein sequencing;Disease variant;Glycoprotein;Lipid degradation;Lipid metabolism;Lipid transport;Reference proteome;Secreted;Sialic acid;Signal;Transport;VLDL	cholesterol efflux [GO:0033344]; cholesterol homeostasis [GO:0042632]; chylomicron remnant clearance [GO:0034382]; G protein-coupled receptor signaling pathway [GO:0007186]; high-density lipoprotein particle remodeling [GO:0034375]; lipoprotein metabolic process [GO:0042157]; negative regulation of cholesterol import [GO:0060621]; negative regulation of fatty acid biosynthetic process [GO:0045717…
LC-MS/MS	FGA	FGA	X	Protein	P02671	FIBA_HUMAN	Fibrinogen alpha chain	866	3D-structure;Adaptive immunity;Alternative splicing;Amyloid;Amyloidosis;Blood coagulation;Calcium;Coiled coil;Direct protein sequencing;Disease variant;Disulfide bond;Glycoprotein;Hemostasis;Hydroxylation;Immunity;Innate immunity;Isopeptide bond;Metal-binding;Phosphoprotein;Reference proteome;Secreted;Signal	adaptive immune response [GO:0002250]; blood coagulation, common pathway [GO:0072377]; blood coagulation, fibrin clot formation [GO:0072378]; cell-matrix adhesion [GO:0007160]; fibrinolysis [GO:0042730]; induction of bacterial agglutination [GO:0043152]; innate immune response [GO:0045087]; negative regulation of endothelial cell apoptotic process [GO:2000352]; negative regulation of extrinsic ap…
LC-MS/MS	FGB	FGB	X	Protein	P02675	FIBB_HUMAN	Fibrinogen beta chain	491	3D-structure;Adaptive immunity;Blood coagulation;Coiled coil;Direct protein sequencing;Disease variant;Disulfide bond;Glycoprotein;Hemostasis;Immunity;Innate immunity;Pyrrolidone carboxylic acid;Reference proteome;Secreted;Signal	adaptive immune response [GO:0002250]; blood coagulation, fibrin clot formation [GO:0072378]; cell-matrix adhesion [GO:0007160]; cellular response to interleukin-1 [GO:0071347]; cellular response to leptin stimulus [GO:0044320]; fibrinolysis [GO:0042730]; induction of bacterial agglutination [GO:0043152]; innate immune response [GO:0045087]; negative regulation of endothelial cell apoptotic proce…
LC-MS/MS	FGG	FGG	X	Protein	P02679	FIBG_HUMAN	Fibrinogen gamma chain	453	3D-structure;Alternative splicing;Blood coagulation;Calcium;Coiled coil;Direct protein sequencing;Disease variant;Disulfide bond;Glycoprotein;Hemostasis;Isopeptide bond;Metal-binding;Phosphoprotein;Reference proteome;Secreted;Signal;Sulfation	blood coagulation, fibrin clot formation [GO:0072378]; cell-matrix adhesion [GO:0007160]; cellular response to interleukin-1 [GO:0071347]; cellular response to interleukin-6 [GO:0071354]; fibrinolysis [GO:0042730]; negative regulation of endothelial cell apoptotic process [GO:2000352]; negative regulation of extrinsic apoptotic signaling pathway via death domain receptors [GO:1902042]; plasminoge…
LC-MS/MS	CRP	CRP	X	Protein	P02741	CRP_HUMAN	C-reactive protein	224	3D-structure;Acute phase;Alternative splicing;Calcium;Direct protein sequencing;Disulfide bond;Metal-binding;Pyrrolidone carboxylic acid;Reference proteome;Secreted;Signal	acute-phase response [GO:0006953]; defense response to Gram-positive bacterium [GO:0050830]; inflammatory response [GO:0006954]; innate immune response [GO:0045087]; negative regulation of lipid storage [GO:0010888]; negative regulation of macrophage derived foam cell differentiation [GO:0010745]; negative regulation of mononuclear cell proliferation [GO:0032945]; opsonization [GO:0008228]; posit…
LC-MS/MS	APCS	APCS	X	Protein	P02743	SAMP_HUMAN	Serum amyloid P-component	223	3D-structure;Amyloid;Calcium;Direct protein sequencing;Disulfide bond;Glycoprotein;Lectin;Metal-binding;Reference proteome;Secreted;Signal	acute-phase response [GO:0006953]; chaperone-mediated protein complex assembly [GO:0051131]; innate immune response [GO:0045087]; negative regulation by host of viral exo-alpha-sialidase activity [GO:0044869]; negative regulation by host of viral glycoprotein metabolic process [GO:0044871]; negative regulation of acute inflammatory response [GO:0002674]; negative regulation of exo-alpha-sialidase…
LC-MS/MS	C1QA	C1QA		Protein	P02745	C1QA_HUMAN	Complement C1q subcomponent subunit A	245	3D-structure;Collagen;Complement pathway;Direct protein sequencing;Disulfide bond;Glycoprotein;Host-virus interaction;Hydroxylation;Immunity;Innate immunity;Reference proteome;Repeat;Secreted;Signal	astrocyte activation [GO:0048143]; cell-cell signaling [GO:0007267]; complement activation [GO:0006956]; complement activation, classical pathway [GO:0006958]; complement-mediated synapse pruning [GO:0150062]; innate immune response [GO:0045087]; microglial cell activation [GO:0001774]; neuron remodeling [GO:0016322]; synapse organization [GO:0050808]; synapse pruning [GO:0098883]; vertebrate eye…
LC-MS/MS	C1QB	C1QB		Protein	P02746	C1QB_HUMAN	Complement C1q subcomponent subunit B	253	3D-structure;Collagen;Complement pathway;Direct protein sequencing;Disease variant;Disulfide bond;Glycoprotein;Hydroxylation;Immunity;Innate immunity;Pyrrolidone carboxylic acid;Reference proteome;Repeat;Secreted;Signal	complement activation [GO:0006956]; complement activation, classical pathway [GO:0006958]; innate immune response [GO:0045087]; synapse pruning [GO:0098883]
LC-MS/MS	C1QC	C1QC		Protein	P02747	C1QC_HUMAN	Complement C1q subcomponent subunit C	245	3D-structure;Collagen;Complement pathway;Direct protein sequencing;Disease variant;Disulfide bond;Glycoprotein;Hydroxylation;Immunity;Innate immunity;Reference proteome;Repeat;Secreted;Signal	complement activation, classical pathway [GO:0006958]; immune response [GO:0006955]; innate immune response [GO:0045087]; negative regulation of granulocyte differentiation [GO:0030853]; negative regulation of macrophage differentiation [GO:0045650]; synapse pruning [GO:0098883]
LC-MS/MS	C9	C9		Protein	P02748	CO9_HUMAN	Complement component C9	559	3D-structure;Age-related macular degeneration;Complement alternate pathway;Complement pathway;Cytolysis;Direct protein sequencing;Disease variant;Disulfide bond;EGF-like domain;Glycoprotein;Immunity;Innate immunity;Membrane;Membrane attack complex;Phosphoprotein;Reference proteome;Secreted;Signal;Target cell membrane;Target membrane;Transmembrane;Transmembrane beta strand	cell killing [GO:0001906]; complement activation [GO:0006956]; complement activation, alternative pathway [GO:0006957]; complement activation, classical pathway [GO:0006958]; killing of cells of another organism [GO:0031640]; positive regulation of immune response [GO:0050778]; protein homooligomerization [GO:0051260]
LC-MS/MS	APOH	APOH		Protein	P02749	APOH_HUMAN	Beta-2-glycoprotein 1	345	3D-structure;Direct protein sequencing;Disulfide bond;Glycoprotein;Heparin-binding;Reference proteome;Repeat;Secreted;Signal;Sushi	blood coagulation, intrinsic pathway [GO:0007597]; negative regulation of angiogenesis [GO:0016525]; negative regulation of blood coagulation [GO:0030195]; negative regulation of endothelial cell migration [GO:0010596]; negative regulation of endothelial cell proliferation [GO:0001937]; negative regulation of fibrinolysis [GO:0051918]; negative regulation of myeloid cell apoptotic process [GO:003…
LC-MS/MS	LRG1	LRG1		Protein	P02750	A2GL_HUMAN	Leucine-rich alpha-2-glycoprotein	347	3D-structure;Direct protein sequencing;Disulfide bond;Glycoprotein;Leucine-rich repeat;Reference proteome;Repeat;Secreted;Signal	brown fat cell differentiation [GO:0050873]; keratinocyte migration [GO:0051546]; leukocyte adhesion to vascular endothelial cell [GO:0061756]; positive regulation of angiogenesis [GO:0045766]; positive regulation of endothelial cell proliferation [GO:0001938]; positive regulation of epithelial cell proliferation involved in wound healing [GO:0060054]; positive regulation of epithelial to mesench…
[truncated: 374 more rows]

## Sheet: Table S2. Number of clusters...
Table S2. Number of clusters generated for the analysis by comparison, assay and type of algorithm.
	2+3+4 Kmeans	Monti’s Kmeans	Total
	Raw Data	Raw Data
SCOPD and Control data
LC-MS/MS	9	2	11
Immune-based Multiplex	9	2	11
Both	9	2	11
Total	27	6	33
AECOPD and SCOPD data
LC-MS/MS	9	2	11
[truncated: 4 more rows]

## Sheet: Table S3. Significant ...
Table S3. Significant Differential Abundant Proteins/Peptides (DAPs) between both clusters obtained by Kmeans (Cluster A – “exacerbator-like profile” vs. Cluster B – “SCOPD-like profile”)
[truncated: 55 more rows]
